# Supplementary material for: Expression Profiles of Differentially Expressed Circular RNAs and circRNA–miRNA–mRNA Regulatory Networks in SH-SY5Y Cells Infected with Coxsackievirus B5
Source: Hindawi journal article supplement (doi:10.1155/2022/9298149), 2022-10-10
Supplement: f1 [file 9298149.f1.pdf]

**Table S1. Identifie of total circRNAs**

| <b>circRNA_ID</b> | <b>strand</b> | <b>gene_id</b>        | <b>samples</b> |
|-------------------|---------------|-----------------------|----------------|
| hsa_circ_0004663  | +             | ENSG00000047644;      | Con_5Y1        |
| hsa_circ_0006727  | +             | ENSG00000077713;      | Con_5Y1        |
| hsa_circ_0091506  | +             | ENSG00000156697;      | Con_5Y1        |
| hsa_circ_0007717  | +             | ENSG00000176896;      | Con_5Y1        |
| hsa_circ_0090739  | -             | ENSG00000086758;      | Con_5Y1        |
| hsa_circ_0002227  | -             | ENSG00000085224;      | Con_5Y1        |
| hsa_circ_0030130  | +             | ENSG00000102780;      | Con_5Y1        |
| hsa_circ_0030567  | -             | ENSG00000125257;      | Con_5Y1        |
| hsa_circ_0030722  | +             | ENSG00000134882;      | Con_5Y1        |
| hsa_circ_0027861  | +             | ENSG00000136021;      | Con_5Y1        |
| hsa_circ_0028021  | +             | ENSG00000111785;      | Con_5Y1        |
| hsa_circ_0008081  | -             | ENSG00000110880;      | Con_5Y1        |
| hsa_circ_0028146  | +             | ENSG00000139437;      | Con_5Y1        |
| hsa_circ_0028319  | -             | ENSG00000198270;      | Con_5Y1        |
| hsa_circ_0029051  | -             | ENSG00000284934;ENSG0 | Con_5Y1        |
| hsa_circ_0025506  | +             | ENSG00000013588;      | Con_5Y1        |
| hsa_circ_0029553  | -             | ENSG00000176915;      | Con_5Y1        |
| hsa_circ_0000385  | +             | ENSG00000123106;      | Con_5Y1        |
| hsa_circ_0025785  | -             | ENSG00000110888;      | Con_5Y1        |
| hsa_circ_0026616  | -             | ENSG00000094914;      | Con_5Y1        |
| hsa_circ_0002419  | +             | ENSG00000067798;      | Con_5Y1        |
| hsa_circ_0027707  | -             | ENSG00000070961;      | Con_5Y1        |
| hsa_circ_0005127  | +             | ENSG00000076043;      | Con_5Y1        |
| hsa_circ_0024473  | +             | ENSG00000095139;      | Con_5Y1        |
| hsa_circ_0008960  | +             | ENSG00000172273;      | Con_5Y1        |
| hsa_circ_0021500  | +             | ENSG00000185238;      | Con_5Y1        |
| hsa_circ_0021728  | +             | ENSG00000026508;      | Con_5Y1        |
| hsa_circ_0020915  | -             | ENSG00000110713;      | Con_5Y1        |
| hsa_circ_0002464  | -             | ENSG00000110713;      | Con_5Y1        |
| hsa_circ_0004899  | +             | ENSG00000198561;      | Con_5Y1        |
| hsa_circ_0002440  | -             | ENSG00000175376;      | Con_5Y1        |
| hsa_circ_0023031  | +             | ENSG00000173715;      | Con_5Y1        |
| hsa_circ_0001968  | +             | ENSG00000110075;      | Con_5Y1        |
| hsa_circ_0023555  | -             | ENSG00000168014;      | Con_5Y1        |
| hsa_circ_0023940  | -             | ENSG00000073921;      | Con_5Y1        |
| hsa_circ_0024016  | +             | ENSG00000166004;      | Con_5Y1        |
| hsa_circ_0019777  | +             | ENSG00000148842;      | Con_5Y1        |
| hsa_circ_0017469  | +             | ENSG00000047056;      | Con_5Y1        |
| hsa_circ_0020078  | +             | ENSG00000151553;      | Con_5Y1        |
| hsa_circ_0017709  | -             | ENSG00000151461;      | Con_5Y1        |
| hsa_circ_0020336  | +             | ENSG00000019995;      | Con_5Y1        |
| hsa_circ_0008885  | -             | ENSG00000175029;      | Con_5Y1        |
| hsa_circ_0006279  | +             | ENSG00000120539;      | Con_5Y1        |
| hsa_circ_0007403  | -             | ENSG00000134470;      | Con_5Y1        |
| hsa_circ_0003658  | +             | ENSG00000138311;      | Con_5Y1        |
| hsa_circ_0018544  | +             | ENSG00000060339;      | Con_5Y1        |
| hsa_circ_0018557  | +             | ENSG00000060339;      | Con_5Y1        |
| hsa_circ_0018659  | +             | ENSG00000107719;      | Con_5Y1        |
| hsa_circ_0007797  | +             | ENSG00000035403;      | Con_5Y1        |
| hsa_circ_0019116  | +             | ENSG00000107854;      | Con_5Y1        |
| hsa_circ_0008332  | +             | ENSG00000107854;      | Con_5Y1        |
| hsa_circ_0019120  | +             | ENSG00000095564;      | Con_5Y1        |
| hsa_circ_0004896  | -             | ENSG00000171311;      | Con_5Y1        |
| hsa_circ_0019421  | +             | ENSG00000198018;      | Con_5Y1        |
| hsa_circ_0007871  | -             | ENSG00000167193;      | Con_5Y1        |
| hsa_circ_0042268  | -             | ENSG00000171953;      | Con_5Y1        |

|                  |   |                  |         |
|------------------|---|------------------|---------|
| hsa_circ_0042418 | - | ENSG00000108599; | Con_5Y1 |
| hsa_circ_0004719 | - | ENSG00000108599; | Con_5Y1 |
| hsa_circ_0041147 | - | ENSG00000181031; | Con_5Y1 |
| hsa_circ_0003481 | - | ENSG00000109118; | Con_5Y1 |
| hsa_circ_0004329 | - | ENSG00000108578; | Con_5Y1 |
| hsa_circ_0008283 | + | ENSG00000276234; | Con_5Y1 |
| hsa_circ_0043379 | - | ENSG00000276293; | Con_5Y1 |
| hsa_circ_0043975 | + | ENSG00000188554; | Con_5Y1 |
| hsa_circ_0000785 | - | ENSG00000008294; | Con_5Y1 |
| hsa_circ_0044699 | + | ENSG00000166263; | Con_5Y1 |
| hsa_circ_0044792 | + | ENSG00000108384; | Con_5Y1 |
| hsa_circ_0044812 | - | ENSG00000108395; | Con_5Y1 |
| hsa_circ_0044875 | + | ENSG00000062716; | Con_5Y1 |
| hsa_circ_0000798 | + | ENSG00000171634; | Con_5Y1 |
| hsa_circ_0045834 | + | ENSG00000092931; | Con_5Y1 |
| hsa_circ_0005294 | + | ENSG00000170037; | Con_5Y1 |
| hsa_circ_0046178 | - | ENSG00000182446; | Con_5Y1 |
| hsa_circ_0005221 | - | ENSG00000182446; | Con_5Y1 |
| hsa_circ_0046200 | - | ENSG00000182446; | Con_5Y1 |
| hsa_circ_0046496 | + | ENSG00000141556; | Con_5Y1 |
| hsa_circ_0002078 | + | ENSG00000103222; | Con_5Y1 |
| hsa_circ_0037353 | - | ENSG00000063854; | Con_5Y1 |
| hsa_circ_0006315 | + | ENSG00000205629; | Con_5Y1 |
| hsa_circ_0037558 | + | ENSG00000167978; | Con_5Y1 |
| hsa_circ_0007175 | + | ENSG00000213918; | Con_5Y1 |
| hsa_circ_0039245 | - | ENSG00000129636; | Con_5Y1 |
| hsa_circ_0039353 | + | ENSG00000177200; | Con_5Y1 |
| hsa_circ_0004656 | + | ENSG00000103064; | Con_5Y1 |
| hsa_circ_0040132 | + | ENSG00000090857; | Con_5Y1 |
| hsa_circ_0040937 | + | ENSG00000197912; | Con_5Y1 |
| hsa_circ_0007550 | + | ENSG00000183475; | Con_5Y1 |
| hsa_circ_0008425 | - | ENSG00000185418; | Con_5Y1 |
| hsa_circ_0035058 | + | ENSG00000137770; | Con_5Y1 |
| hsa_circ_0035060 | + | ENSG00000137770; | Con_5Y1 |
| hsa_circ_0035086 | - | ENSG00000104133; | Con_5Y1 |
| hsa_circ_0035209 | - | ENSG00000104064; | Con_5Y1 |
| hsa_circ_0004432 | - | ENSG00000157483; | Con_5Y1 |
| hsa_circ_0000615 | + | ENSG00000180357; | Con_5Y1 |
| hsa_circ_0036103 | - | ENSG00000137831; | Con_5Y1 |
| hsa_circ_0036295 | - | ENSG00000179151; | Con_5Y1 |
| hsa_circ_0036587 | - | ENSG00000064726; | Con_5Y1 |
| hsa_circ_0036998 | + | ENSG00000173575; | Con_5Y1 |
| hsa_circ_0006592 | + | ENSG00000022976; | Con_5Y1 |
| hsa_circ_0008754 | - | ENSG00000185024; | Con_5Y1 |
| hsa_circ_0031113 | - | ENSG00000129566; | Con_5Y1 |
| hsa_circ_0031427 | + | ENSG00000092108; | Con_5Y1 |
| hsa_circ_0031871 | - | ENSG00000151748; | Con_5Y1 |
| hsa_circ_0032115 | + | ENSG00000020426; | Con_5Y1 |
| hsa_circ_0049260 | + | ENSG00000065989; | Con_5Y1 |
| hsa_circ_0049265 | + | ENSG00000065989; | Con_5Y1 |
| hsa_circ_0004853 | + | ENSG00000123146; | Con_5Y1 |
| hsa_circ_0049874 | + | ENSG00000196684; | Con_5Y1 |
| hsa_circ_0008942 | + | ENSG00000099331; | Con_5Y1 |
| hsa_circ_0050534 | + | ENSG00000126261; | Con_5Y1 |
| hsa_circ_0051526 | - | ENSG00000125746; | Con_5Y1 |
| hsa_circ_0052233 | + | ENSG00000133247; | Con_5Y1 |
| hsa_circ_0048800 | - | ENSG00000031823; | Con_5Y1 |
| hsa_circ_0047016 | + | ENSG00000101639; | Con_5Y1 |

|                  |   |                       |         |
|------------------|---|-----------------------|---------|
| hsa_circ_0046657 | + | ENSG00000101557;      | Con_5Y1 |
| hsa_circ_0002608 | + | ENSG00000101752;      | Con_5Y1 |
| hsa_circ_0046704 | - | ENSG00000101574;      | Con_5Y1 |
| hsa_circ_0047690 | + | ENSG00000082212;      | Con_5Y1 |
| hsa_circ_0000850 | + | ENSG00000082212;      | Con_5Y1 |
| hsa_circ_0047719 | + | ENSG00000101751;      | Con_5Y1 |
| hsa_circ_0047719 | + | ENSG00000101751;      | Con_5Y1 |
| hsa_circ_0047723 | + | ENSG00000101751;      | Con_5Y1 |
| hsa_circ_0005140 | - | ENSG00000101493;      | Con_5Y1 |
| hsa_circ_0048011 | + | ENSG00000166377;      | Con_5Y1 |
| hsa_circ_0048021 | + | ENSG00000166377;      | Con_5Y1 |
| hsa_circ_0046841 | + | ENSG00000101745;      | Con_5Y1 |
| hsa_circ_0046883 | - | ENSG00000154845;      | Con_5Y1 |
| hsa_circ_0062220 | - | ENSG00000070371;      | Con_5Y1 |
| hsa_circ_0062279 | + | ENSG00000093010;      | Con_5Y1 |
| hsa_circ_0062547 | - | ENSG00000228315;ENSG0 | Con_5Y1 |
| hsa_circ_0062926 | - | ENSG00000241878;      | Con_5Y1 |
| hsa_circ_0063681 | - | ENSG00000100271;      | Con_5Y1 |
| hsa_circ_0063776 | + | ENSG00000197182;      | Con_5Y1 |
| hsa_circ_0060237 | - | ENSG00000080839;      | Con_5Y1 |
| hsa_circ_0002182 | + | ENSG00000124198;      | Con_5Y1 |
| hsa_circ_0006359 | + | ENSG00000197818;      | Con_5Y1 |
| hsa_circ_0059402 | + | ENSG00000286235;ENSG0 | Con_5Y1 |
| hsa_circ_0061694 | + | ENSG00000157540;      | Con_5Y1 |
| hsa_circ_0061740 | - | ENSG00000185658;      | Con_5Y1 |
| hsa_circ_0081749 | - | ENSG00000105821;      | Con_5Y1 |
| hsa_circ_0003331 | - | ENSG00000091127;      | Con_5Y1 |
| hsa_circ_0081892 | - | ENSG00000164597;      | Con_5Y1 |
| hsa_circ_0082335 | + | ENSG00000128607;      | Con_5Y1 |
| hsa_circ_0002014 | - | ENSG00000146842;      | Con_5Y1 |
| hsa_circ_0003746 | + | ENSG00000122786;      | Con_5Y1 |
| hsa_circ_0079126 | - | ENSG00000164880;      | Con_5Y1 |
| hsa_circ_0083055 | - | ENSG00000055609;      | Con_5Y1 |
| hsa_circ_0002097 | - | ENSG00000105928;      | Con_5Y1 |
| hsa_circ_0006365 | + | ENSG00000169902;      | Con_5Y1 |
| hsa_circ_0080496 | - | ENSG00000106635;      | Con_5Y1 |
| hsa_circ_0077483 | - | ENSG00000112249;      | Con_5Y1 |
| hsa_circ_0007138 | - | ENSG00000152894;      | Con_5Y1 |
| hsa_circ_0077824 | - | ENSG00000146376;      | Con_5Y1 |
| hsa_circ_0077824 | - | ENSG00000146376;      | Con_5Y1 |
| hsa_circ_0006407 | - | ENSG00000164483;      | Con_5Y1 |
| hsa_circ_0077957 | - | ENSG00000135525;      | Con_5Y1 |
| hsa_circ_0078226 | - | ENSG00000131023;      | Con_5Y1 |
| hsa_circ_0078765 | + | ENSG00000130023;      | Con_5Y1 |
| hsa_circ_0075740 | - | ENSG00000124789;      | Con_5Y1 |
| hsa_circ_0075748 | - | ENSG00000137177;      | Con_5Y1 |
| hsa_circ_0075878 | + | ENSG00000079691;      | Con_5Y1 |
| hsa_circ_0075496 | + | ENSG00000137275;      | Con_5Y1 |
| hsa_circ_0077082 | + | ENSG00000112701;      | Con_5Y1 |
| hsa_circ_0077183 | - | ENSG00000005700;      | Con_5Y1 |
| hsa_circ_0007806 | - | ENSG00000072364;      | Con_5Y1 |
| hsa_circ_0074102 | + | ENSG00000120733;      | Con_5Y1 |
| hsa_circ_0074863 | + | ENSG00000113645;      | Con_5Y1 |
| hsa_circ_0007958 | + | ENSG00000113643;      | Con_5Y1 |
| hsa_circ_0074881 | + | ENSG00000113643;      | Con_5Y1 |
| hsa_circ_0075071 | + | ENSG00000164466;      | Con_5Y1 |
| hsa_circ_0008631 | - | ENSG00000087206;      | Con_5Y1 |
| hsa_circ_0004138 | - | ENSG00000246596;      | Con_5Y1 |

|                  |   |                       |         |
|------------------|---|-----------------------|---------|
| hsa_circ_0072275 | - | ENSG00000113569;      | Con_5Y1 |
| hsa_circ_0001483 | - | ENSG00000067248;      | Con_5Y1 |
| hsa_circ_0071660 | + | ENSG00000112877;      | Con_5Y1 |
| hsa_circ_0001498 | - | ENSG00000164253;      | Con_5Y1 |
| hsa_circ_0073163 | + | ENSG00000039319;      | Con_5Y1 |
| hsa_circ_0005187 | + | n/a                   | Con_5Y1 |
| hsa_circ_0003875 | + | ENSG00000138802;      | Con_5Y1 |
| hsa_circ_0070648 | + | ENSG00000138802;      | Con_5Y1 |
| hsa_circ_0068839 | - | ENSG00000159692;      | Con_5Y1 |
| hsa_circ_0071206 | - | ENSG00000198589;      | Con_5Y1 |
| hsa_circ_0069031 | - | ENSG00000132406;      | Con_5Y1 |
| hsa_circ_0070482 | + | ENSG00000138698;      | Con_5Y1 |
| hsa_circ_0003640 | + | ENSG00000164024;      | Con_5Y1 |
| hsa_circ_0064306 | + | ENSG00000197548;      | Con_5Y1 |
| hsa_circ_0066826 | + | ENSG00000114573;      | Con_5Y1 |
| hsa_circ_0002243 | - | ENSG00000163785;      | Con_5Y1 |
| hsa_circ_0001341 | + | ENSG00000114054;      | Con_5Y1 |
| hsa_circ_0067492 | + | ENSG00000174564;      | Con_5Y1 |
| hsa_circ_0067621 | - | ENSG00000114127;      | Con_5Y1 |
| hsa_circ_0067689 | + | ENSG00000163754;      | Con_5Y1 |
| hsa_circ_0008929 | + | ENSG00000163655;      | Con_5Y1 |
| hsa_circ_0006614 | + | ENSG00000163872;      | Con_5Y1 |
| hsa_circ_0001374 | + | ENSG00000152492;      | Con_5Y1 |
| hsa_circ_0004555 | + | n/a                   | Con_5Y1 |
| hsa_circ_0064576 | + | ENSG00000174738;      | Con_5Y1 |
| hsa_circ_0066078 | - | ENSG00000163939;      | Con_5Y1 |
| hsa_circ_0066414 | + | ENSG00000144724;      | Con_5Y1 |
| hsa_circ_0007176 | - | ENSG00000144231;      | Con_5Y1 |
| hsa_circ_0003525 | - | ENSG00000136715;      | Con_5Y1 |
| hsa_circ_0056433 | + | ENSG00000136731;      | Con_5Y1 |
| hsa_circ_0056734 | + | ENSG00000157827;      | Con_5Y1 |
| hsa_circ_0001081 | + | ENSG00000115827;      | Con_5Y1 |
| hsa_circ_0057128 | - | ENSG00000172845;      | Con_5Y1 |
| hsa_circ_0057301 | + | ENSG00000163002;      | Con_5Y1 |
| hsa_circ_0002541 | - | ENSG00000162971;      | Con_5Y1 |
| hsa_circ_0003337 | + | ENSG00000055044;      | Con_5Y1 |
| hsa_circ_0058213 | + | ENSG00000163466;      | Con_5Y1 |
| hsa_circ_0001102 | - | ENSG00000286239;ENSG0 | Con_5Y1 |
| hsa_circ_0053882 | + | ENSG00000018699;      | Con_5Y1 |
| hsa_circ_0054086 | - | ENSG00000008869;      | Con_5Y1 |
| hsa_circ_0054190 | - | ENSG00000011566;      | Con_5Y1 |
| hsa_circ_0054214 | - | ENSG00000011566;      | Con_5Y1 |
| hsa_circ_0004447 | + | ENSG00000171132;      | Con_5Y1 |
| hsa_circ_0054608 | - | ENSG00000085760;      | Con_5Y1 |
| hsa_circ_0054626 | - | ENSG00000275052;      | Con_5Y1 |
| hsa_circ_0054895 | - | ENSG00000082898;      | Con_5Y1 |
| hsa_circ_0005504 | - | ENSG00000198380;      | Con_5Y1 |
| hsa_circ_0055412 | - | ENSG00000042493;      | Con_5Y1 |
| hsa_circ_0001052 | - | ENSG00000135945;      | Con_5Y1 |
| hsa_circ_0002623 | + | ENSG00000173218;      | Con_5Y1 |
| hsa_circ_0009995 | + | ENSG00000048707;      | Con_5Y1 |
| hsa_circ_0014151 | - | ENSG00000143393;      | Con_5Y1 |
| hsa_circ_0014644 | - | ENSG00000132680;      | Con_5Y1 |
| hsa_circ_0000020 | + | ENSG00000197312;      | Con_5Y1 |
| hsa_circ_0010109 | + | ENSG00000065526;      | Con_5Y1 |
| hsa_circ_0015444 | + | ENSG00000057252;      | Con_5Y1 |
| hsa_circ_0015491 | + | ENSG00000135837;      | Con_5Y1 |
| hsa_circ_0008071 | - | ENSG00000075151;      | Con_5Y1 |

|                    |   |                       |         |
|--------------------|---|-----------------------|---------|
| hsa_circ_0016414   | + | ENSG00000162769;      | Con_5Y1 |
| hsa_circ_0016707   | - | ENSG00000183814;      | Con_5Y1 |
| hsa_circ_0016873   | - | ENSG00000119280;      | Con_5Y1 |
| hsa_circ_0017160   | + | ENSG00000116984;      | Con_5Y1 |
| hsa_circ_0009376   | + | ENSG00000157916;      | Con_5Y1 |
| hsa_circ_0017263   | - | ENSG00000035687;      | Con_5Y1 |
| hsa_circ_0010972   | + | ENSG00000130695;      | Con_5Y1 |
| hsa_circ_0011120   | - | ENSG00000158161;      | Con_5Y1 |
| hsa_circ_0004320   | + | ENSG00000197056;      | Con_5Y1 |
| hsa_circ_0006595   | + | ENSG00000126091;ENSG0 | Con_5Y1 |
| hsa_circ_0012550   | - | ENSG00000134744;      | Con_5Y1 |
| hsa_circ_0088404   | + | ENSG00000011454;      | Con_5Y1 |
| hsa_circ_0088417   | - | ENSG00000165209;      | Con_5Y1 |
| hsa_circ_0088530   | - | ENSG00000173611;      | Con_5Y1 |
| hsa_circ_0088600   | - | ENSG00000119487;      | Con_5Y1 |
| hsa_circ_0004403   | + | ENSG00000136828;      | Con_5Y1 |
| hsa_circ_0088661   | + | ENSG00000148356;      | Con_5Y1 |
| hsa_circ_0089721   | + | ENSG00000181090;      | Con_5Y1 |
| hsa_circ_0007784   | - | ENSG00000171889;      | Con_5Y1 |
| hsa_circ_0087024   | - | ENSG00000137075;      | Con_5Y1 |
| hsa_circ_0002921   | - | ENSG00000107362;      | Con_5Y1 |
| hsa_circ_0087232   | + | ENSG00000099139;      | Con_5Y1 |
| hsa_circ_0004725   | - | ENSG00000135018;      | Con_5Y1 |
| hsa_circ_0087396   | + | ENSG00000135040;      | Con_5Y1 |
| hsa_circ_0008171   | - | ENSG00000104517;      | Con_5Y1 |
| hsa_circ_0007374   | - | ENSG00000155096;      | Con_5Y1 |
| hsa_circ_0002330   | - | ENSG00000153317;      | Con_5Y1 |
| hsa_circ_0085719   | - | ENSG00000123908;      | Con_5Y1 |
| hsa_circ_0085778   | + | ENSG00000105339;      | Con_5Y1 |
| hsa_circ_0083458   | + | ENSG00000078674;      | Con_5Y1 |
| hsa_circ_0083263   | + | ENSG00000283239;ENSG0 | Con_5Y1 |
| hsa_circ_0083826   | + | ENSG00000147421;      | Con_5Y1 |
| hsa_circ_0083995   | - | ENSG00000147548;      | Con_5Y1 |
| hsa_circ_0084266   | - | ENSG00000253729;      | Con_5Y1 |
| hsa_circ_0084501   | - | ENSG00000023287;      | Con_5Y1 |
| hsa_circ_0084677   | + | ENSG00000104218;      | Con_5Y1 |
| hsa_circ_0084868   | - | ENSG00000104320;      | Con_5Y1 |
| hsa_circ_0084935   | + | ENSG00000156162;      | Con_5Y1 |
| hsa_circ_0001814   | + | ENSG00000164941;      | Con_5Y1 |
| hsa_circ_0085081   | + | ENSG00000132549;      | Con_5Y1 |
| novel_circ_0018625 | - | n/a                   | Con_5Y1 |
| novel_circ_0018665 | + | ENSG00000101911;      | Con_5Y1 |
| novel_circ_0018687 | - | ENSG00000213468;      | Con_5Y1 |
| novel_circ_0018791 | + | ENSG00000130741;      | Con_5Y1 |
| novel_circ_0002827 | + | ENSG00000068650;      | Con_5Y1 |
| novel_circ_0002899 | - | ENSG00000132953;      | Con_5Y1 |
| novel_circ_0002962 | - | ENSG00000139514;      | Con_5Y1 |
| novel_circ_0003015 | - | ENSG00000120690;      | Con_5Y1 |
| novel_circ_0003185 | - | ENSG00000005810;      | Con_5Y1 |
| novel_circ_0003211 | - | ENSG00000125257;      | Con_5Y1 |
| novel_circ_0001827 | - | ENSG00000111670;      | Con_5Y1 |
| novel_circ_0001888 | - | ENSG00000075856;      | Con_5Y1 |
| novel_circ_0001912 | + | ENSG00000122970;      | Con_5Y1 |
| novel_circ_0001914 | + | ENSG00000122970;      | Con_5Y1 |
| novel_circ_0001938 | + | ENSG00000204852;      | Con_5Y1 |
| novel_circ_0001941 | + | ENSG00000082805;      | Con_5Y1 |
| novel_circ_0002057 | - | ENSG00000089154;      | Con_5Y1 |
| novel_circ_0002104 | - | ENSG00000111011;      | Con_5Y1 |

|                    |   |                       |         |
|--------------------|---|-----------------------|---------|
| novel_circ_0002118 | + | ENSG00000184445;      | Con_5Y1 |
| novel_circ_0002148 | - | ENSG00000139697;      | Con_5Y1 |
| novel_circ_0002184 | - | ENSG00000196498;      | Con_5Y1 |
| novel_circ_0002193 | - | ENSG00000150990;      | Con_5Y1 |
| novel_circ_0002207 | - | ENSG00000111450;      | Con_5Y1 |
| novel_circ_0002215 | + | ENSG00000183495;      | Con_5Y1 |
| novel_circ_0002242 | + | ENSG00000171681;      | Con_5Y1 |
| novel_circ_0002245 | + | ENSG00000023697;      | Con_5Y1 |
| novel_circ_0002260 | + | ENSG00000052126;      | Con_5Y1 |
| novel_circ_0002279 | + | ENSG00000139163;      | Con_5Y1 |
| novel_circ_0002355 | + | ENSG00000013573;      | Con_5Y1 |
| novel_circ_0002410 | - | ENSG00000129317;      | Con_5Y1 |
| novel_circ_0002433 | + | ENSG00000257261;      | Con_5Y1 |
| novel_circ_0002461 | + | ENSG00000123352;      | Con_5Y1 |
| novel_circ_0002492 | + | ENSG00000050426;      | Con_5Y1 |
| novel_circ_0002615 | + | ENSG00000111581;      | Con_5Y1 |
| novel_circ_0002630 | + | ENSG00000135679;      | Con_5Y1 |
| novel_circ_0002658 | - | ENSG00000133858;      | Con_5Y1 |
| novel_circ_0002705 | - | ENSG00000058272;      | Con_5Y1 |
| novel_circ_0000996 | - | ENSG00000133812;      | Con_5Y1 |
| novel_circ_0001003 | + | ENSG00000137693;      | Con_5Y1 |
| novel_circ_0001035 | - | ENSG00000152404;      | Con_5Y1 |
| novel_circ_0001055 | - | ENSG00000149308;      | Con_5Y1 |
| novel_circ_0001094 | - | ENSG00000086848;      | Con_5Y1 |
| novel_circ_0001111 | - | ENSG00000110328;      | Con_5Y1 |
| novel_circ_0001124 | + | ENSG00000118058;      | Con_5Y1 |
| novel_circ_0001180 | + | ENSG00000245498;      | Con_5Y1 |
| novel_circ_0001241 | - | ENSG00000011405;      | Con_5Y1 |
| novel_circ_0001333 | + | ENSG00000135387;      | Con_5Y1 |
| novel_circ_0001358 | + | ENSG00000026508;      | Con_5Y1 |
| novel_circ_0001406 | + | ENSG00000151348;      | Con_5Y1 |
| novel_circ_0001423 | + | ENSG00000175224;      | Con_5Y1 |
| novel_circ_0001484 | + | ENSG00000256591;      | Con_5Y1 |
| novel_circ_0001501 | - | ENSG00000255717;      | Con_5Y1 |
| novel_circ_0001515 | - | ENSG00000110076;      | Con_5Y1 |
| novel_circ_0001790 | + | ENSG00000166037;      | Con_5Y1 |
| novel_circ_0000051 | - | ENSG00000120029;      | Con_5Y1 |
| novel_circ_0000080 | + | ENSG00000148843;      | Con_5Y1 |
| novel_circ_0000103 | + | ENSG00000108055;      | Con_5Y1 |
| novel_circ_0000121 | + | ENSG00000151532;      | Con_5Y1 |
| novel_circ_0000133 | + | n/a                   | Con_5Y1 |
| novel_circ_0000190 | - | ENSG00000107581;      | Con_5Y1 |
| novel_circ_0000198 | - | ENSG00000151461;      | Con_5Y1 |
| novel_circ_0000309 | + | ENSG00000203780;      | Con_5Y1 |
| novel_circ_0000352 | + | ENSG00000065328;      | Con_5Y1 |
| novel_circ_0000425 | + | ENSG00000269897;ENSG0 | Con_5Y1 |
| novel_circ_0000482 | + | ENSG00000095787;      | Con_5Y1 |
| novel_circ_0000483 | + | ENSG00000095787;      | Con_5Y1 |
| novel_circ_0000501 | - | ENSG00000165322;      | Con_5Y1 |
| novel_circ_0000518 | + | ENSG00000216937;      | Con_5Y1 |
| novel_circ_0000533 | - | ENSG00000148498;      | Con_5Y1 |
| novel_circ_0000567 | - | ENSG00000165406;      | Con_5Y1 |
| novel_circ_0000645 | - | ENSG00000057608;      | Con_5Y1 |
| novel_circ_0000701 | - | ENSG00000138346;      | Con_5Y1 |
| novel_circ_0000707 | - | ENSG00000138346;      | Con_5Y1 |
| novel_circ_0000714 | + | ENSG00000138336;      | Con_5Y1 |
| novel_circ_0000778 | - | ENSG00000122882;      | Con_5Y1 |
| novel_circ_0000833 | - | ENSG00000107929;      | Con_5Y1 |

|                    |   |                       |         |
|--------------------|---|-----------------------|---------|
| novel_circ_0000845 | - | ENSG00000182771;      | Con_5Y1 |
| novel_circ_0000856 | - | ENSG00000062650;      | Con_5Y1 |
| novel_circ_0000915 | + | ENSG00000138160;      | Con_5Y1 |
| novel_circ_0000950 | - | ENSG00000059573;      | Con_5Y1 |
| novel_circ_0005327 | + | ENSG00000132383;      | Con_5Y1 |
| novel_circ_0005393 | - | ENSG00000007202;      | Con_5Y1 |
| novel_circ_0005454 | + | ENSG00000196712;      | Con_5Y1 |
| novel_circ_0005523 | + | ENSG00000276234;      | Con_5Y1 |
| novel_circ_0005566 | - | ENSG00000074755;      | Con_5Y1 |
| novel_circ_0005598 | - | ENSG00000108799;      | Con_5Y1 |
| novel_circ_0005748 | + | ENSG00000011260;      | Con_5Y1 |
| novel_circ_0005925 | + | ENSG00000198909;      | Con_5Y1 |
| novel_circ_0005977 | - | ENSG00000154240;      | Con_5Y1 |
| novel_circ_0006053 | + | ENSG00000073350;      | Con_5Y1 |
| novel_circ_0006087 | + | ENSG00000078687;      | Con_5Y1 |
| novel_circ_0004630 | + | ENSG00000186260;      | Con_5Y1 |
| novel_circ_0004644 | - | ENSG00000166783;      | Con_5Y1 |
| novel_circ_0004681 | - | ENSG00000063854;      | Con_5Y1 |
| novel_circ_0004699 | + | ENSG00000103528;      | Con_5Y1 |
| novel_circ_0004888 | + | ENSG00000102910;      | Con_5Y1 |
| novel_circ_0004894 | + | ENSG00000102910;      | Con_5Y1 |
| novel_circ_0004903 | + | ENSG00000155393;      | Con_5Y1 |
| novel_circ_0004930 | + | ENSG00000087253;      | Con_5Y1 |
| novel_circ_0004941 | - | ENSG00000135736;      | Con_5Y1 |
| novel_circ_0004950 | - | ENSG00000125107;      | Con_5Y1 |
| novel_circ_0004966 | - | ENSG00000159720;      | Con_5Y1 |
| novel_circ_0005153 | - | ENSG00000103248;      | Con_5Y1 |
| novel_circ_0005154 | - | ENSG00000103248;      | Con_5Y1 |
| novel_circ_0005165 | - | ENSG00000103257;      | Con_5Y1 |
| novel_circ_0005189 | + | ENSG00000158545;      | Con_5Y1 |
| novel_circ_0005223 | + | ENSG00000197912;      | Con_5Y1 |
| novel_circ_0003954 | + | ENSG00000184254;      | Con_5Y1 |
| novel_circ_0003969 | - | ENSG00000273749;      | Con_5Y1 |
| novel_circ_0004072 | + | ENSG00000137815;      | Con_5Y1 |
| novel_circ_0004080 | - | ENSG00000166887;      | Con_5Y1 |
| novel_circ_0004132 | - | ENSG00000104133;      | Con_5Y1 |
| novel_circ_0004143 | - | ENSG00000166200;      | Con_5Y1 |
| novel_circ_0004153 | - | ENSG00000166262;      | Con_5Y1 |
| novel_circ_0004203 | - | ENSG00000285253;ENSG0 | Con_5Y1 |
| novel_circ_0004310 | - | ENSG00000075131;      | Con_5Y1 |
| novel_circ_0004316 | + | ENSG00000174442;      | Con_5Y1 |
| novel_circ_0004479 | + | ENSG00000086666;      | Con_5Y1 |
| novel_circ_0004498 | - | ENSG00000064726;      | Con_5Y1 |
| novel_circ_0004521 | + | ENSG00000170776;      | Con_5Y1 |
| novel_circ_0004546 | + | ENSG00000166965;      | Con_5Y1 |
| novel_circ_0004558 | + | ENSG00000173575;      | Con_5Y1 |
| novel_circ_0003351 | + | ENSG00000100664;      | Con_5Y1 |
| novel_circ_0003393 | - | ENSG00000165819;      | Con_5Y1 |
| novel_circ_0003408 | - | ENSG00000100802;      | Con_5Y1 |
| novel_circ_0003453 | - | ENSG00000092148;      | Con_5Y1 |
| novel_circ_0003481 | - | ENSG00000129515;      | Con_5Y1 |
| novel_circ_0003501 | - | ENSG00000151332;      | Con_5Y1 |
| novel_circ_0003577 | - | ENSG00000087299;      | Con_5Y1 |
| novel_circ_0003687 | + | ENSG00000054654;      | Con_5Y1 |
| novel_circ_0003774 | + | ENSG00000100767;      | Con_5Y1 |
| novel_circ_0003785 | + | ENSG00000258653;ENSG0 | Con_5Y1 |
| novel_circ_0003792 | + | ENSG00000119596;      | Con_5Y1 |
| novel_circ_0003878 | - | ENSG00000100796;      | Con_5Y1 |

|                    |   |                       |         |
|--------------------|---|-----------------------|---------|
| novel_circ_0003888 | + | ENSG00000165934;      | Con_5Y1 |
| novel_circ_0006735 | - | ENSG00000267059;ENSG0 | Con_5Y1 |
| novel_circ_0006851 | - | ENSG00000121289;      | Con_5Y1 |
| novel_circ_0007015 | + | ENSG00000105464;      | Con_5Y1 |
| novel_circ_0007100 | + | n/a                   | Con_5Y1 |
| novel_circ_0007137 | - | ENSG00000070423;      | Con_5Y1 |
| novel_circ_0007160 | - | ENSG00000167785;      | Con_5Y1 |
| novel_circ_0006298 | + | ENSG00000141449;      | Con_5Y1 |
| novel_circ_0006309 | + | ENSG00000167088;      | Con_5Y1 |
| novel_circ_0006338 | + | ENSG00000101773;      | Con_5Y1 |
| novel_circ_0006378 | + | ENSG00000101596;      | Con_5Y1 |
| novel_circ_0006484 | + | ENSG00000082212;      | Con_5Y1 |
| novel_circ_0009712 | + | ENSG00000099940;      | Con_5Y1 |
| novel_circ_0009835 | - | ENSG00000233080;      | Con_5Y1 |
| novel_circ_0009931 | - | ENSG00000100271;      | Con_5Y1 |
| novel_circ_0010001 | - | ENSG00000128159;      | Con_5Y1 |
| novel_circ_0010003 | + | ENSG00000025770;      | Con_5Y1 |
| novel_circ_0009159 | - | ENSG00000101391;      | Con_5Y1 |
| novel_circ_0009232 | + | ENSG00000025293;      | Con_5Y1 |
| novel_circ_0009273 | + | ENSG00000088888;      | Con_5Y1 |
| novel_circ_0009383 | + | ENSG00000197818;      | Con_5Y1 |
| novel_circ_0009385 | + | ENSG00000197818;      | Con_5Y1 |
| novel_circ_0009530 | - | ENSG00000156299;      | Con_5Y1 |
| novel_circ_0009548 | + | ENSG00000142166;      | Con_5Y1 |
| novel_circ_0009651 | + | ENSG00000160218;      | Con_5Y1 |
| novel_circ_0009683 | + | ENSG00000160299;      | Con_5Y1 |
| novel_circ_0015819 | - | ENSG00000239521;      | Con_5Y1 |
| novel_circ_0015878 | + | ENSG00000005483;      | Con_5Y1 |
| novel_circ_0016053 | + | ENSG00000146963;ENSG0 | Con_5Y1 |
| novel_circ_0016054 | + | ENSG00000146963;ENSG0 | Con_5Y1 |
| novel_circ_0016185 | - | ENSG00000146918;      | Con_5Y1 |
| novel_circ_0016215 | + | ENSG00000136261;      | Con_5Y1 |
| novel_circ_0016273 | - | ENSG00000164548;      | Con_5Y1 |
| novel_circ_0016307 | - | ENSG00000070882;      | Con_5Y1 |
| novel_circ_0016393 | + | ENSG00000011426;      | Con_5Y1 |
| novel_circ_0016464 | + | ENSG00000075618;      | Con_5Y1 |
| novel_circ_0016599 | - | ENSG00000009954;      | Con_5Y1 |
| novel_circ_0016645 | + | ENSG00000187257;      | Con_5Y1 |
| novel_circ_0014938 | - | ENSG00000112249;      | Con_5Y1 |
| novel_circ_0014978 | + | ENSG00000183137;      | Con_5Y1 |
| novel_circ_0014979 | - | ENSG00000135596;      | Con_5Y1 |
| novel_circ_0015072 | - | ENSG00000152894;      | Con_5Y1 |
| novel_circ_0015146 | + | ENSG00000112149;      | Con_5Y1 |
| novel_circ_0015227 | + | ENSG00000008083;      | Con_5Y1 |
| novel_circ_0015286 | + | ENSG00000164674;      | Con_5Y1 |
| novel_circ_0015308 | + | ENSG00000085511;      | Con_5Y1 |
| novel_circ_0015448 | - | n/a                   | Con_5Y1 |
| novel_circ_0015452 | + | ENSG00000237649;      | Con_5Y1 |
| novel_circ_0015466 | + | ENSG00000065060;      | Con_5Y1 |
| novel_circ_0015468 | + | ENSG00000023892;      | Con_5Y1 |
| novel_circ_0015544 | - | ENSG00000124571;      | Con_5Y1 |
| novel_circ_0015575 | - | ENSG00000001084;      | Con_5Y1 |
| novel_circ_0015685 | - | n/a                   | Con_5Y1 |
| novel_circ_0015698 | + | ENSG00000083123;      | Con_5Y1 |
| novel_circ_0013968 | + | ENSG00000145495;      | Con_5Y1 |
| novel_circ_0013971 | + | ENSG00000145495;      | Con_5Y1 |
| novel_circ_0014004 | - | ENSG00000129595;      | Con_5Y1 |
| novel_circ_0014019 | + | ENSG00000172795;      | Con_5Y1 |



|                    |   |                       |         |
|--------------------|---|-----------------------|---------|
| novel_circ_0014077 | + | ENSG00000164902;      | Con_5Y1 |
| novel_circ_0014286 | - | ENSG00000133706;      | Con_5Y1 |
| novel_circ_0014355 | + | ENSG00000249738;      | Con_5Y1 |
| novel_circ_0014356 | + | ENSG00000113312;      | Con_5Y1 |
| novel_circ_0014367 | + | ENSG00000038274;      | Con_5Y1 |
| novel_circ_0014411 | + | ENSG00000113194;      | Con_5Y1 |
| novel_circ_0014427 | + | ENSG00000197451;      | Con_5Y1 |
| novel_circ_0014453 | + | ENSG00000161011;      | Con_5Y1 |
| novel_circ_0014489 | - | ENSG00000113360;      | Con_5Y1 |
| novel_circ_0014601 | - | ENSG00000067248;      | Con_5Y1 |
| novel_circ_0014622 | + | ENSG00000062194;      | Con_5Y1 |
| novel_circ_0014721 | + | ENSG00000145734;      | Con_5Y1 |
| novel_circ_0014771 | + | ENSG00000250802;      | Con_5Y1 |
| novel_circ_0014867 | + | ENSG00000071539;      | Con_5Y1 |
| novel_circ_0013140 | + | ENSG00000138792;      | Con_5Y1 |
| novel_circ_0013199 | - | ENSG00000164073;      | Con_5Y1 |
| novel_circ_0013205 | + | ENSG00000138709;      | Con_5Y1 |
| novel_circ_0013265 | - | ENSG00000109452;      | Con_5Y1 |
| novel_circ_0013398 | + | ENSG00000109466;      | Con_5Y1 |
| novel_circ_0013487 | + | ENSG00000109794;      | Con_5Y1 |
| novel_circ_0013597 | + | ENSG00000197386;      | Con_5Y1 |
| novel_circ_0013608 | - | ENSG00000181826;      | Con_5Y1 |
| novel_circ_0013628 | - | ENSG00000121892;      | Con_5Y1 |
| novel_circ_0013645 | + | ENSG00000078177;      | Con_5Y1 |
| novel_circ_0013763 | - | ENSG00000084092;      | Con_5Y1 |
| novel_circ_0013882 | + | ENSG00000138678;      | Con_5Y1 |
| novel_circ_0013908 | + | ENSG00000170502;      | Con_5Y1 |
| novel_circ_0013911 | + | ENSG00000118762;      | Con_5Y1 |
| novel_circ_0011780 | - | ENSG00000066422;      | Con_5Y1 |
| novel_circ_0011843 | - | ENSG00000144559;      | Con_5Y1 |
| novel_circ_0011900 | - | ENSG00000169087;      | Con_5Y1 |
| novel_circ_0011923 | - | ENSG00000082781;      | Con_5Y1 |
| novel_circ_0012077 | - | ENSG00000051382;      | Con_5Y1 |
| novel_circ_0012103 | - | ENSG00000175054;      | Con_5Y1 |
| novel_circ_0012105 | + | ENSG00000120756;      | Con_5Y1 |
| novel_circ_0012212 | + | ENSG00000113810;      | Con_5Y1 |
| novel_circ_0012255 | - | ENSG00000154310;      | Con_5Y1 |
| novel_circ_0012261 | - | ENSG00000131374;      | Con_5Y1 |
| novel_circ_0012296 | - | ENSG00000131374;      | Con_5Y1 |
| novel_circ_0012308 | + | ENSG00000171109;      | Con_5Y1 |
| novel_circ_0012334 | - | ENSG00000078070;      | Con_5Y1 |
| novel_circ_0012365 | + | ENSG00000156931;      | Con_5Y1 |
| novel_circ_0012389 | + | ENSG00000163904;      | Con_5Y1 |
| novel_circ_0012447 | - | ENSG00000273331;ENSG0 | Con_5Y1 |
| novel_circ_0012523 | - | ENSG00000077097;      | Con_5Y1 |
| novel_circ_0012535 | - | ENSG00000033867;      | Con_5Y1 |
| novel_circ_0012546 | - | ENSG00000235493;      | Con_5Y1 |
| novel_circ_0012602 | + | ENSG00000182973;      | Con_5Y1 |
| novel_circ_0012688 | + | ENSG00000114857;      | Con_5Y1 |
| novel_circ_0012741 | + | ENSG00000227398;      | Con_5Y1 |
| novel_circ_0012796 | - | ENSG00000047849;      | Con_5Y1 |
| novel_circ_0012852 | + | ENSG00000164080;      | Con_5Y1 |
| novel_circ_0012944 | - | ENSG00000189283;      | Con_5Y1 |
| novel_circ_0013006 | - | ENSG00000144736;      | Con_5Y1 |
| novel_circ_0013027 | + | ENSG00000134077;      | Con_5Y1 |
| novel_circ_0013036 | + | ENSG00000168137;      | Con_5Y1 |
| novel_circ_0013043 | + | ENSG00000114026;      | Con_5Y1 |
| novel_circ_0013044 | - | ENSG00000134072;      | Con_5Y1 |

|                    |   |                       |         |
|--------------------|---|-----------------------|---------|
| novel_circ_0013059 | - | ENSG00000057019;      | Con_5Y1 |
| novel_circ_0010026 | + | ENSG00000071054;      | Con_5Y1 |
| novel_circ_0010032 | + | ENSG00000135974;      | Con_5Y1 |
| novel_circ_0010056 | + | ENSG00000163006;      | Con_5Y1 |
| novel_circ_0010179 | + | ENSG00000136731;      | Con_5Y1 |
| novel_circ_0010248 | + | ENSG00000115705;      | Con_5Y1 |
| novel_circ_0010342 | - | ENSG00000196151;      | Con_5Y1 |
| novel_circ_0010345 | - | ENSG00000123636;      | Con_5Y1 |
| novel_circ_0010359 | - | ENSG00000115290;      | Con_5Y1 |
| novel_circ_0010468 | - | ENSG00000115966;      | Con_5Y1 |
| novel_circ_0010528 | + | ENSG00000138448;      | Con_5Y1 |
| novel_circ_0010541 | + | ENSG00000064933;      | Con_5Y1 |
| novel_circ_0010669 | + | ENSG00000119004;      | Con_5Y1 |
| novel_circ_0010736 | + | n/a                   | Con_5Y1 |
| novel_circ_0010738 | + | ENSG00000079246;      | Con_5Y1 |
| novel_circ_0010788 | + | n/a                   | Con_5Y1 |
| novel_circ_0010898 | + | ENSG00000204120;      | Con_5Y1 |
| novel_circ_0011157 | + | ENSG00000171853;      | Con_5Y1 |
| novel_circ_0011365 | - | ENSG00000068878;      | Con_5Y1 |
| novel_circ_0011500 | + | ENSG00000115504;      | Con_5Y1 |
| novel_circ_0011540 | - | ENSG00000243667;ENSG0 | Con_5Y1 |
| novel_circ_0011613 | + | ENSG00000116127;      | Con_5Y1 |
| novel_circ_0011642 | + | ENSG00000115459;      | Con_5Y1 |
| novel_circ_0011702 | - | ENSG00000151694;      | Con_5Y1 |
| novel_circ_0007176 | - | ENSG00000156876;      | Con_5Y1 |
| novel_circ_0007217 | + | ENSG00000031698;      | Con_5Y1 |
| novel_circ_0007309 | + | ENSG00000048707;      | Con_5Y1 |
| novel_circ_0007310 | + | ENSG00000048707;      | Con_5Y1 |
| novel_circ_0007369 | - | ENSG00000143418;      | Con_5Y1 |
| novel_circ_0007400 | + | ENSG00000142621;      | Con_5Y1 |
| novel_circ_0007584 | + | ENSG00000117523;      | Con_5Y1 |
| novel_circ_0007696 | + | ENSG00000135837;      | Con_5Y1 |
| novel_circ_0007733 | + | ENSG00000116668;      | Con_5Y1 |
| novel_circ_0007868 | - | ENSG00000127483;      | Con_5Y1 |
| novel_circ_0007970 | - | ENSG00000136628;      | Con_5Y1 |
| novel_circ_0007983 | + | ENSG00000117791;      | Con_5Y1 |
| novel_circ_0008096 | - | ENSG00000069248;      | Con_5Y1 |
| novel_circ_0008123 | - | ENSG00000135766;      | Con_5Y1 |
| novel_circ_0008186 | - | ENSG00000162885;      | Con_5Y1 |
| novel_circ_0008198 | - | ENSG00000119285;      | Con_5Y1 |
| novel_circ_0008223 | + | n/a                   | Con_5Y1 |
| novel_circ_0008275 | - | ENSG00000162851;      | Con_5Y1 |
| novel_circ_0008302 | + | ENSG00000117682;      | Con_5Y1 |
| novel_circ_0008445 | - | ENSG00000092853;      | Con_5Y1 |
| novel_circ_0008591 | + | ENSG00000162368;      | Con_5Y1 |
| novel_circ_0008640 | - | ENSG00000078618;      | Con_5Y1 |
| novel_circ_0008654 | - | ENSG00000134744;      | Con_5Y1 |
| novel_circ_0008754 | + | ENSG00000162607;      | Con_5Y1 |
| novel_circ_0008815 | + | ENSG00000116754;      | Con_5Y1 |
| novel_circ_0008854 | - | ENSG00000077254;      | Con_5Y1 |
| novel_circ_0008957 | - | ENSG00000122482;      | Con_5Y1 |
| novel_circ_0008960 | + | ENSG00000189195;      | Con_5Y1 |
| novel_circ_0008993 | + | ENSG00000122483;      | Con_5Y1 |
| novel_circ_0017752 | + | ENSG00000119509;      | Con_5Y1 |
| novel_circ_0017814 | + | ENSG00000157654;ENSG0 | Con_5Y1 |
| novel_circ_0017953 | - | ENSG00000119414;      | Con_5Y1 |
| novel_circ_0017957 | + | ENSG00000165219;      | Con_5Y1 |
| novel_circ_0018041 | - | ENSG00000107290;      | Con_5Y1 |

|                    |   |                       |                 |
|--------------------|---|-----------------------|-----------------|
| novel_circ_0018212 | + | n/a                   | Con_5Y1         |
| novel_circ_0018302 | + | ENSG00000165304;      | Con_5Y1         |
| novel_circ_0018457 | - | ENSG00000135052;      | Con_5Y1         |
| novel_circ_0016992 | - | ENSG00000154359;      | Con_5Y1         |
| novel_circ_0017309 | - | ENSG00000129696;      | Con_5Y1         |
| novel_circ_0017389 | + | ENSG00000164808;      | Con_5Y1         |
| novel_circ_0017392 | - | ENSG00000253729;      | Con_5Y1         |
| novel_circ_0017570 | - | ENSG00000276418;      | Con_5Y1         |
| novel_circ_0017607 | - | ENSG00000251136;      | Con_5Y1         |
| novel_circ_0017666 | - | ENSG00000164944;      | Con_5Y1         |
| novel_circ_0017699 | + | ENSG00000173273;      | Con_5Y1         |
| novel_circ_0017703 | + | ENSG00000147649;      | Con_5Y1         |
| novel_circ_0017705 | + | ENSG00000147649;      | Con_5Y1         |
| novel_circ_0017720 | - | ENSG00000104375;      | Con_5Y1         |
| novel_circ_0017744 | + | ENSG00000132549;      | Con_5Y1         |
| hsa_circ_0003450   | - | ENSG00000123562;      | Con_5Y1,Con_5Y2 |
| hsa_circ_0001913   | - | ENSG00000147010;      | Con_5Y1,Con_5Y2 |
| hsa_circ_0000509   | + | ENSG00000185896;      | Con_5Y1,Con_5Y2 |
| hsa_circ_0025002   | + | ENSG00000006831;      | Con_5Y1,Con_5Y2 |
| hsa_circ_0026153   | + | ENSG00000123352;      | Con_5Y1,Con_5Y2 |
| hsa_circ_0025219   | - | ENSG00000285238;ENSG0 | Con_5Y1,Con_5Y2 |
| hsa_circ_0025359   | + | ENSG00000065970;      | Con_5Y1,Con_5Y2 |
| hsa_circ_0020875   | - | ENSG00000110713;      | Con_5Y1,Con_5Y2 |
| hsa_circ_0004410   | - | ENSG00000110713;      | Con_5Y1,Con_5Y2 |
| hsa_circ_0023229   | + | ENSG00000110075;      | Con_5Y1,Con_5Y2 |
| hsa_circ_0023655   | + | ENSG00000158636;      | Con_5Y1,Con_5Y2 |
| hsa_circ_0003546   | - | ENSG00000184014;      | Con_5Y1,Con_5Y2 |
| hsa_circ_0006820   | + | ENSG00000204152;ENSG0 | Con_5Y1,Con_5Y2 |
| hsa_circ_0003168   | + | ENSG00000155256;      | Con_5Y1,Con_5Y2 |
| hsa_circ_0042835   | + | ENSG00000108582;      | Con_5Y1,Con_5Y2 |
| hsa_circ_0007990   | - | ENSG00000161395;      | Con_5Y1,Con_5Y2 |
| hsa_circ_0043816   | - | ENSG00000168610;      | Con_5Y1,Con_5Y2 |
| hsa_circ_0044273   | + | ENSG00000141279;      | Con_5Y1,Con_5Y2 |
| hsa_circ_0045440   | + | ENSG00000171634;      | Con_5Y1,Con_5Y2 |
| hsa_circ_0041872   | + | ENSG00000181222;      | Con_5Y1,Con_5Y2 |
| hsa_circ_0045788   | - | ENSG00000129646;      | Con_5Y1,Con_5Y2 |
| hsa_circ_0002988   | + | ENSG00000038532;      | Con_5Y1,Con_5Y2 |
| hsa_circ_0037875   | - | ENSG00000153066;      | Con_5Y1,Con_5Y2 |
| hsa_circ_0003645   | + | ENSG00000103544;      | Con_5Y1,Con_5Y2 |
| hsa_circ_0038737   | - | ENSG00000077235;      | Con_5Y1,Con_5Y2 |
| hsa_circ_0040078   | + | ENSG00000102908;      | Con_5Y1,Con_5Y2 |
| hsa_circ_0003398   | - | ENSG00000128731;      | Con_5Y1,Con_5Y2 |
| hsa_circ_0000606   | - | ENSG00000128915;      | Con_5Y1,Con_5Y2 |
| hsa_circ_0000614   | + | ENSG00000028528;      | Con_5Y1,Con_5Y2 |
| hsa_circ_0035897   | - | ENSG00000074603;      | Con_5Y1,Con_5Y2 |
| hsa_circ_0007837   | + | ENSG00000140525;      | Con_5Y1,Con_5Y2 |
| hsa_circ_0031194   | - | ENSG00000100888;      | Con_5Y1,Con_5Y2 |
| hsa_circ_0008568   | - | ENSG00000258704;      | Con_5Y1,Con_5Y2 |
| hsa_circ_0007976   | + | ENSG00000100644;      | Con_5Y1,Con_5Y2 |
| hsa_circ_0032384   | + | ENSG00000100731;      | Con_5Y1,Con_5Y2 |
| hsa_circ_0008762   | + | ENSG00000105364;      | Con_5Y1,Con_5Y2 |
| hsa_circ_0006392   | + | ENSG00000141905;      | Con_5Y1,Con_5Y2 |
| hsa_circ_0050532   | + | ENSG00000126261;      | Con_5Y1,Con_5Y2 |
| hsa_circ_0051123   | + | ENSG00000090006;      | Con_5Y1,Con_5Y2 |
| hsa_circ_0005800   | + | ENSG00000104880;ENSG0 | Con_5Y1,Con_5Y2 |
| hsa_circ_0047803   | + | ENSG00000172175;      | Con_5Y1,Con_5Y2 |
| hsa_circ_0048027   | + | ENSG00000060069;      | Con_5Y1,Con_5Y2 |
| hsa_circ_0059334   | + | ENSG00000088888;      | Con_5Y1,Con_5Y2 |

|                    |   |                       |                 |
|--------------------|---|-----------------------|-----------------|
| hsa_circ_0060517   | + | ENSG00000101104;      | Con_5Y1,Con_5Y2 |
| hsa_circ_0060937   | - | ENSG00000019186;      | Con_5Y1,Con_5Y2 |
| hsa_circ_0001740   | + | ENSG00000128534;      | Con_5Y1,Con_5Y2 |
| hsa_circ_0079546   | + | ENSG00000105866;      | Con_5Y1,Con_5Y2 |
| hsa_circ_0001717   | + | ENSG00000106665;      | Con_5Y1,Con_5Y2 |
| hsa_circ_0008163   | + | ENSG00000130429;ENSG0 | Con_5Y1,Con_5Y2 |
| hsa_circ_0002037   | - | ENSG00000124571;      | Con_5Y1,Con_5Y2 |
| hsa_circ_0073942   | - | ENSG00000113575;      | Con_5Y1,Con_5Y2 |
| hsa_circ_0007402   | + | ENSG00000131503;ENSG0 | Con_5Y1,Con_5Y2 |
| hsa_circ_0074332   | - | ENSG00000171720;      | Con_5Y1,Con_5Y2 |
| hsa_circ_0074704   | + | ENSG00000155506;      | Con_5Y1,Con_5Y2 |
| hsa_circ_0072892   | + | ENSG00000145734;      | Con_5Y1,Con_5Y2 |
| hsa_circ_0007860   | + | ENSG00000138780;      | Con_5Y1,Con_5Y2 |
| hsa_circ_0069977   | + | ENSG00000163738;      | Con_5Y1,Con_5Y2 |
| hsa_circ_0007096   | + | ENSG00000138768;      | Con_5Y1,Con_5Y2 |
| hsa_circ_0070253   | - | ENSG00000138674;      | Con_5Y1,Con_5Y2 |
| hsa_circ_0003626   | - | ENSG00000118007;      | Con_5Y1,Con_5Y2 |
| hsa_circ_0068142   | + | ENSG00000058063;      | Con_5Y1,Con_5Y2 |
| hsa_circ_0064557   | - | ENSG00000182568;      | Con_5Y1,Con_5Y2 |
| hsa_circ_0068647   | - | ENSG00000163960;      | Con_5Y1,Con_5Y2 |
| hsa_circ_0002639   | - | ENSG00000144635;      | Con_5Y1,Con_5Y2 |
| hsa_circ_0065378   | - | ENSG00000164050;      | Con_5Y1,Con_5Y2 |
| hsa_circ_0066271   | + | ENSG00000163681;      | Con_5Y1,Con_5Y2 |
| hsa_circ_0066406   | + | ENSG00000144724;      | Con_5Y1,Con_5Y2 |
| hsa_circ_0056244   | + | ENSG00000088179;      | Con_5Y1,Con_5Y2 |
| hsa_circ_0002428   | + | ENSG00000115419;      | Con_5Y1,Con_5Y2 |
| hsa_circ_0057908   | - | ENSG00000023228;      | Con_5Y1,Con_5Y2 |
| hsa_circ_0058923   | - | ENSG00000130414;      | Con_5Y1,Con_5Y2 |
| hsa_circ_0053439   | + | ENSG00000115760;      | Con_5Y1,Con_5Y2 |
| hsa_circ_0054990   | - | ENSG00000198369;      | Con_5Y1,Con_5Y2 |
| hsa_circ_0002863   | - | ENSG00000198380;      | Con_5Y1,Con_5Y2 |
| hsa_circ_0006955   | + | ENSG00000130939;      | Con_5Y1,Con_5Y2 |
| hsa_circ_0000017   | - | ENSG00000171824;      | Con_5Y1,Con_5Y2 |
| hsa_circ_0002233   | - | ENSG00000196505;      | Con_5Y1,Con_5Y2 |
| hsa_circ_0014022   | + | ENSG00000143374;      | Con_5Y1,Con_5Y2 |
| hsa_circ_0006352   | + | ENSG00000143379;      | Con_5Y1,Con_5Y2 |
| hsa_circ_0000130   | + | ENSG00000143376;      | Con_5Y1,Con_5Y2 |
| hsa_circ_0010113   | + | ENSG00000065526;      | Con_5Y1,Con_5Y2 |
| hsa_circ_0016408   | + | ENSG00000162769;      | Con_5Y1,Con_5Y2 |
| hsa_circ_0011162   | - | ENSG00000120656;      | Con_5Y1,Con_5Y2 |
| hsa_circ_0003099   | + | ENSG00000066135;      | Con_5Y1,Con_5Y2 |
| hsa_circ_0009135   | - | ENSG00000131697;      | Con_5Y1,Con_5Y2 |
| hsa_circ_0004607   | - | ENSG00000153904;      | Con_5Y1,Con_5Y2 |
| hsa_circ_0088284   | - | ENSG00000136861;      | Con_5Y1,Con_5Y2 |
| hsa_circ_0086296   | + | ENSG00000147854;      | Con_5Y1,Con_5Y2 |
| hsa_circ_0009125   | + | ENSG00000130956;      | Con_5Y1,Con_5Y2 |
| hsa_circ_0008921   | - | ENSG00000155096;      | Con_5Y1,Con_5Y2 |
| hsa_circ_0085447   | + | ENSG00000156787;      | Con_5Y1,Con_5Y2 |
| hsa_circ_0007779   | - | ENSG00000189376;ENSG0 | Con_5Y1,Con_5Y2 |
| hsa_circ_0085694   | - | ENSG00000167632;      | Con_5Y1,Con_5Y2 |
| hsa_circ_0084941   | + | ENSG00000164941;      | Con_5Y1,Con_5Y2 |
| novel_circ_0018765 | - | ENSG00000102098;      | Con_5Y1,Con_5Y2 |
| novel_circ_0018869 | + | ENSG00000165591;      | Con_5Y1,Con_5Y2 |
| novel_circ_0002012 | - | ENSG00000089060;      | Con_5Y1,Con_5Y2 |
| novel_circ_0002105 | - | ENSG00000111011;      | Con_5Y1,Con_5Y2 |
| novel_circ_0002765 | - | ENSG00000180263;      | Con_5Y1,Con_5Y2 |
| novel_circ_0001103 | - | ENSG00000110328;      | Con_5Y1,Con_5Y2 |
| novel_circ_0001149 | + | ENSG00000110395;      | Con_5Y1,Con_5Y2 |

|                    |   |                       |                 |
|--------------------|---|-----------------------|-----------------|
| novel_circ_0001482 | - | ENSG00000149532;      | Con_5Y1,Con_5Y2 |
| novel_circ_0000428 | - | ENSG00000150867;      | Con_5Y1,Con_5Y2 |
| novel_circ_0006163 | - | ENSG00000176155;      | Con_5Y1,Con_5Y2 |
| novel_circ_0005183 | + | ENSG00000158545;      | Con_5Y1,Con_5Y2 |
| novel_circ_0003939 | - | ENSG00000140470;      | Con_5Y1,Con_5Y2 |
| novel_circ_0003953 | + | n/a                   | Con_5Y1,Con_5Y2 |
| novel_circ_0004003 | + | ENSG00000285077;ENSG0 | Con_5Y1,Con_5Y2 |
| novel_circ_0004064 | - | ENSG00000128908;      | Con_5Y1,Con_5Y2 |
| novel_circ_0004073 | + | ENSG00000137815;      | Con_5Y1,Con_5Y2 |
| novel_circ_0004126 | + | ENSG00000104131;      | Con_5Y1,Con_5Y2 |
| novel_circ_0004190 | - | ENSG00000128833;      | Con_5Y1,Con_5Y2 |
| novel_circ_0004246 | + | ENSG00000140455;      | Con_5Y1,Con_5Y2 |
| novel_circ_0004465 | + | ENSG00000140403;      | Con_5Y1,Con_5Y2 |
| novel_circ_0007058 | + | n/a                   | Con_5Y1,Con_5Y2 |
| novel_circ_0006475 | - | ENSG00000172361;      | Con_5Y1,Con_5Y2 |
| novel_circ_0006595 | + | ENSG00000166377;      | Con_5Y1,Con_5Y2 |
| novel_circ_0009774 | - | ENSG00000180957;      | Con_5Y1,Con_5Y2 |
| novel_circ_0009943 | + | ENSG00000248405;ENSG0 | Con_5Y1,Con_5Y2 |
| novel_circ_0009071 | - | ENSG00000089048;      | Con_5Y1,Con_5Y2 |
| novel_circ_0015866 | - | ENSG00000164815;      | Con_5Y1,Con_5Y2 |
| novel_circ_0016176 | + | ENSG00000009335;      | Con_5Y1,Con_5Y2 |
| novel_circ_0016701 | + | ENSG00000105793;      | Con_5Y1,Con_5Y2 |
| novel_circ_0015097 | + | ENSG00000118507;      | Con_5Y1,Con_5Y2 |
| novel_circ_0015386 | - | ENSG00000124795;      | Con_5Y1,Con_5Y2 |
| novel_circ_0015788 | - | ENSG00000146263;      | Con_5Y1,Con_5Y2 |
| novel_circ_0014921 | - | ENSG00000153922;      | Con_5Y1,Con_5Y2 |
| novel_circ_0013318 | - | ENSG00000198589;      | Con_5Y1,Con_5Y2 |
| novel_circ_0013632 | - | ENSG00000121892;      | Con_5Y1,Con_5Y2 |
| novel_circ_0011804 | + | ENSG00000177707;      | Con_5Y1,Con_5Y2 |
| novel_circ_0011921 | - | ENSG00000082781;      | Con_5Y1,Con_5Y2 |
| novel_circ_0012324 | + | ENSG00000131374;      | Con_5Y1,Con_5Y2 |
| novel_circ_0012702 | + | ENSG00000179152;      | Con_5Y1,Con_5Y2 |
| novel_circ_0012855 | + | ENSG00000164081;      | Con_5Y1,Con_5Y2 |
| novel_circ_0010266 | + | ENSG00000080345;      | Con_5Y1,Con_5Y2 |
| novel_circ_0010839 | + | ENSG00000144468;      | Con_5Y1,Con_5Y2 |
| novel_circ_0011014 | - | ENSG00000138101;      | Con_5Y1,Con_5Y2 |
| novel_circ_0011183 | - | ENSG00000171055;      | Con_5Y1,Con_5Y2 |
| novel_circ_0011221 | - | ENSG00000115904;      | Con_5Y1,Con_5Y2 |
| novel_circ_0011430 | - | ENSG00000115464;      | Con_5Y1,Con_5Y2 |
| novel_circ_0011624 | - | ENSG00000159374;      | Con_5Y1,Con_5Y2 |
| novel_circ_0011647 | + | ENSG00000168883;      | Con_5Y1,Con_5Y2 |
| novel_circ_0007351 | - | ENSG00000143401;      | Con_5Y1,Con_5Y2 |
| novel_circ_0007355 | + | ENSG00000117360;      | Con_5Y1,Con_5Y2 |
| novel_circ_0007547 | - | ENSG00000152382;      | Con_5Y1,Con_5Y2 |
| novel_circ_0007686 | + | ENSG00000162782;      | Con_5Y1,Con_5Y2 |
| novel_circ_0007764 | + | ENSG00000116747;      | Con_5Y1,Con_5Y2 |
| novel_circ_0007869 | - | ENSG00000127483;      | Con_5Y1,Con_5Y2 |
| novel_circ_0008222 | + | ENSG00000174371;      | Con_5Y1,Con_5Y2 |
| novel_circ_0008663 | - | ENSG00000134744;      | Con_5Y1,Con_5Y2 |
| novel_circ_0008998 | + | ENSG00000122483;      | Con_5Y1,Con_5Y2 |
| novel_circ_0018094 | + | ENSG00000177239;      | Con_5Y1,Con_5Y2 |
| novel_circ_0018185 | + | ENSG00000099810;      | Con_5Y1,Con_5Y2 |
| novel_circ_0016825 | - | ENSG00000104517;      | Con_5Y1,Con_5Y2 |
| novel_circ_0016842 | - | ENSG00000155096;      | Con_5Y1,Con_5Y2 |
| novel_circ_0016872 | + | ENSG00000164830;      | Con_5Y1,Con_5Y2 |
| novel_circ_0017357 | - | ENSG00000120925;      | Con_5Y1,Con_5Y2 |
| novel_circ_0017506 | + | ENSG00000104218;      | Con_5Y1,Con_5Y2 |
| novel_circ_0017533 | - | ENSG00000066777;      | Con_5Y1,Con_5Y2 |

|                    |   |                       |                   |
|--------------------|---|-----------------------|-------------------|
| novel_circ_0017735 | + | ENSG00000132549;      | Con_5Y1,Con_5Y2   |
| hsa_circ_0030012   | - | ENSG00000102710;      | Con_5Y1,Con_5Y2,C |
| hsa_circ_0006620   | + | ENSG00000136156;      | Con_5Y1,Con_5Y2,C |
| hsa_circ_0008803   | + | ENSG00000022840;      | Con_5Y1,Con_5Y2,C |
| hsa_circ_0002770   | + | ENSG00000135679;      | Con_5Y1,Con_5Y2,C |
| hsa_circ_0003541   | + | ENSG00000149289;      | Con_5Y1,Con_5Y2,C |
| hsa_circ_0022614   | + | ENSG00000072518;      | Con_5Y1,Con_5Y2,C |
| hsa_circ_0005611   | + | ENSG00000173715;      | Con_5Y1,Con_5Y2,C |
| hsa_circ_0000214   | + | ENSG00000181192;      | Con_5Y1,Con_5Y2,C |
| hsa_circ_0042231   | + | ENSG00000133030;      | Con_5Y1,Con_5Y2,C |
| hsa_circ_0042493   | + | ENSG00000109046;      | Con_5Y1,Con_5Y2,C |
| hsa_circ_0004621   | + | ENSG00000029725;      | Con_5Y1,Con_5Y2,C |
| hsa_circ_0000678   | + | ENSG00000103222;      | Con_5Y1,Con_5Y2,C |
| hsa_circ_0038374   | + | ENSG00000174628;      | Con_5Y1,Con_5Y2,C |
| hsa_circ_0034982   | - | ENSG00000067369;      | Con_5Y1,Con_5Y2,C |
| hsa_circ_0003867   | + | ENSG00000028528;      | Con_5Y1,Con_5Y2,C |
| hsa_circ_0004008   | + | ENSG00000100731;      | Con_5Y1,Con_5Y2,C |
| hsa_circ_0008187   | + | ENSG00000119685;      | Con_5Y1,Con_5Y2,C |
| hsa_circ_0032939   | - | ENSG00000100784;      | Con_5Y1,Con_5Y2,C |
| hsa_circ_0008287   | + | ENSG00000076650;      | Con_5Y1,Con_5Y2,C |
| hsa_circ_0047964   | + | ENSG00000215421;      | Con_5Y1,Con_5Y2,C |
| hsa_circ_0059545   | + | ENSG00000101310;      | Con_5Y1,Con_5Y2,C |
| hsa_circ_0008117   | + | ENSG00000124191;      | Con_5Y1,Con_5Y2,C |
| hsa_circ_0005113   | + | ENSG00000009335;      | Con_5Y1,Con_5Y2,C |
| hsa_circ_0004299   | + | ENSG00000284292;ENSG0 | Con_5Y1,Con_5Y2,C |
| hsa_circ_0077520   | - | ENSG00000085382;      | Con_5Y1,Con_5Y2,C |
| hsa_circ_0003105   | - | ENSG00000152894;      | Con_5Y1,Con_5Y2,C |
| hsa_circ_0003016   | + | ENSG00000112584;      | Con_5Y1,Con_5Y2,C |
| hsa_circ_0074323   | - | ENSG00000131504;      | Con_5Y1,Con_5Y2,C |
| hsa_circ_0001097   | + | ENSG00000115020;      | Con_5Y1,Con_5Y2,C |
| hsa_circ_0003990   | + | ENSG00000057935;      | Con_5Y1,Con_5Y2,C |
| hsa_circ_0011245   | - | ENSG00000134644;      | Con_5Y1,Con_5Y2,C |
| hsa_circ_0002467   | + | ENSG00000121774;      | Con_5Y1,Con_5Y2,C |
| hsa_circ_0004073   | + | ENSG00000181090;      | Con_5Y1,Con_5Y2,C |
| hsa_circ_0084665   | + | ENSG00000104218;      | Con_5Y1,Con_5Y2,C |
| novel_circ_0018874 | - | ENSG00000131089;      | Con_5Y1,Con_5Y2,C |
| novel_circ_0000101 | + | ENSG00000138166;      | Con_5Y1,Con_5Y2,C |
| novel_circ_0000361 | - | ENSG00000165752;      | Con_5Y1,Con_5Y2,C |
| novel_circ_0006182 | + | ENSG00000141568;      | Con_5Y1,Con_5Y2,C |
| novel_circ_0004659 | - | ENSG00000187535;      | Con_5Y1,Con_5Y2,C |
| novel_circ_0004760 | + | ENSG00000090905;      | Con_5Y1,Con_5Y2,C |
| novel_circ_0004400 | + | ENSG00000067141;      | Con_5Y1,Con_5Y2,C |
| novel_circ_0006726 | + | ENSG00000123143;      | Con_5Y1,Con_5Y2,C |
| novel_circ_0006823 | - | ENSG00000104969;      | Con_5Y1,Con_5Y2,C |
| novel_circ_0006362 | - | ENSG00000141447;      | Con_5Y1,Con_5Y2,C |
| novel_circ_0006617 | + | ENSG00000168502;      | Con_5Y1,Con_5Y2,C |
| novel_circ_0009711 | + | ENSG00000099917;      | Con_5Y1,Con_5Y2,C |
| novel_circ_0015874 | + | ENSG00000005483;      | Con_5Y1,Con_5Y2,C |
| novel_circ_0016480 | - | ENSG00000188191;      | Con_5Y1,Con_5Y2,C |
| novel_circ_0014210 | - | ENSG00000120725;      | Con_5Y1,Con_5Y2,C |
| novel_circ_0014436 | + | ENSG00000176783;      | Con_5Y1,Con_5Y2,C |
| novel_circ_0013461 | - | n/a                   | Con_5Y1,Con_5Y2,C |
| novel_circ_0012013 | - | ENSG00000274810;      | Con_5Y1,Con_5Y2,C |
| novel_circ_0012700 | - | ENSG00000144455;      | Con_5Y1,Con_5Y2,C |
| novel_circ_0010796 | + | ENSG00000239498;      | Con_5Y1,Con_5Y2,C |
| novel_circ_0008738 | + | ENSG00000132849;      | Con_5Y1,Con_5Y2,C |
| hsa_circ_0091546   | - | ENSG00000213468;      | Con_5Y1,Con_5Y3   |
| hsa_circ_0008760   | + | ENSG00000152520;      | Con_5Y1,Con_5Y3   |

|                    |   |                       |                 |
|--------------------|---|-----------------------|-----------------|
| hsa_circ_0002748   | - | ENSG00000123066;      | Con_5Y1,Con_5Y3 |
| hsa_circ_0028587   | - | ENSG00000123066;      | Con_5Y1,Con_5Y3 |
| hsa_circ_0008087   | + | ENSG00000153179;      | Con_5Y1,Con_5Y3 |
| hsa_circ_0024236   | + | ENSG00000149311;      | Con_5Y1,Con_5Y3 |
| hsa_circ_0003900   | - | ENSG00000167986;      | Con_5Y1,Con_5Y3 |
| hsa_circ_0005282   | - | ENSG00000110090;      | Con_5Y1,Con_5Y3 |
| hsa_circ_0006534   | - | ENSG00000136758;      | Con_5Y1,Con_5Y3 |
| hsa_circ_0002498   | - | ENSG00000107959;      | Con_5Y1,Con_5Y3 |
| hsa_circ_0002487   | - | ENSG00000148498;      | Con_5Y1,Con_5Y3 |
| hsa_circ_0003023   | - | ENSG00000151240;      | Con_5Y1,Con_5Y3 |
| hsa_circ_0006148   | + | ENSG00000156671;      | Con_5Y1,Con_5Y3 |
| hsa_circ_0000744   | - | ENSG00000141027;      | Con_5Y1,Con_5Y3 |
| hsa_circ_0042977   | + | ENSG00000178691;      | Con_5Y1,Con_5Y3 |
| hsa_circ_0043282   | + | ENSG00000276234;      | Con_5Y1,Con_5Y3 |
| hsa_circ_0045218   | - | ENSG00000108588;      | Con_5Y1,Con_5Y3 |
| hsa_circ_0006264   | + | ENSG00000173821;      | Con_5Y1,Con_5Y3 |
| hsa_circ_0040528   | - | ENSG00000103091;      | Con_5Y1,Con_5Y3 |
| hsa_circ_0040905   | + | ENSG00000176715;      | Con_5Y1,Con_5Y3 |
| hsa_circ_0041011   | - | ENSG00000187741;      | Con_5Y1,Con_5Y3 |
| hsa_circ_0034694   | + | ENSG00000285920;ENSG0 | Con_5Y1,Con_5Y3 |
| hsa_circ_0035929   | - | ENSG00000174485;      | Con_5Y1,Con_5Y3 |
| hsa_circ_0007836   | + | ENSG00000132003;      | Con_5Y1,Con_5Y3 |
| hsa_circ_0005617   | + | ENSG00000198089;      | Con_5Y1,Con_5Y3 |
| hsa_circ_0007130   | + | ENSG00000025293;      | Con_5Y1,Con_5Y3 |
| hsa_circ_0002660   | + | ENSG00000159128;      | Con_5Y1,Con_5Y3 |
| hsa_circ_0008795   | - | ENSG00000159131;      | Con_5Y1,Con_5Y3 |
| hsa_circ_0061722   | - | ENSG00000185658;      | Con_5Y1,Con_5Y3 |
| hsa_circ_0079628   | + | ENSG00000105926;      | Con_5Y1,Con_5Y3 |
| hsa_circ_0077535   | - | ENSG00000057663;      | Con_5Y1,Con_5Y3 |
| hsa_circ_0001647   | + | ENSG00000152818;      | Con_5Y1,Con_5Y3 |
| hsa_circ_0076558   | - | ENSG00000124571;      | Con_5Y1,Con_5Y3 |
| hsa_circ_0073904   | - | ENSG00000072364;      | Con_5Y1,Con_5Y3 |
| hsa_circ_0006694   | + | ENSG00000145907;      | Con_5Y1,Con_5Y3 |
| hsa_circ_0003868   | - | ENSG00000135074;      | Con_5Y1,Con_5Y3 |
| hsa_circ_0006970   | + | ENSG00000113460;      | Con_5Y1,Con_5Y3 |
| hsa_circ_0072758   | + | ENSG00000134057;      | Con_5Y1,Con_5Y3 |
| hsa_circ_0007080   | + | ENSG00000158234;      | Con_5Y1,Con_5Y3 |
| hsa_circ_0068435   | - | ENSG00000244405;      | Con_5Y1,Con_5Y3 |
| hsa_circ_0066434   | + | ENSG00000163635;ENSG0 | Con_5Y1,Con_5Y3 |
| hsa_circ_0005995   | + | ENSG00000143379;      | Con_5Y1,Con_5Y3 |
| hsa_circ_0016905   | + | ENSG00000270106;      | Con_5Y1,Con_5Y3 |
| hsa_circ_0005057   | - | ENSG00000116514;      | Con_5Y1,Con_5Y3 |
| hsa_circ_0004877   | - | ENSG00000085832;      | Con_5Y1,Con_5Y3 |
| hsa_circ_0012742   | - | ENSG00000162601;      | Con_5Y1,Con_5Y3 |
| hsa_circ_0012942   | - | ENSG00000118454;      | Con_5Y1,Con_5Y3 |
| hsa_circ_0003762   | + | ENSG00000086061;      | Con_5Y1,Con_5Y3 |
| hsa_circ_0087248   | + | ENSG00000197969;      | Con_5Y1,Con_5Y3 |
| hsa_circ_0008577   | + | ENSG00000158079;      | Con_5Y1,Con_5Y3 |
| novel_circ_0002873 | + | ENSG00000121741;      | Con_5Y1,Con_5Y3 |
| novel_circ_0002640 | + | ENSG00000166226;      | Con_5Y1,Con_5Y3 |
| novel_circ_0002775 | + | ENSG00000139350;      | Con_5Y1,Con_5Y3 |
| novel_circ_0001315 | + | ENSG00000149100;      | Con_5Y1,Con_5Y3 |
| novel_circ_0001670 | - | ENSG00000048649;      | Con_5Y1,Con_5Y3 |
| novel_circ_0001766 | + | ENSG00000182919;ENSG0 | Con_5Y1,Con_5Y3 |
| novel_circ_0000404 | - | ENSG00000241058;      | Con_5Y1,Con_5Y3 |
| novel_circ_0000432 | - | n/a                   | Con_5Y1,Con_5Y3 |
| novel_circ_0000914 | + | ENSG00000138160;      | Con_5Y1,Con_5Y3 |
| novel_circ_0000992 | - | ENSG00000107554;      | Con_5Y1,Con_5Y3 |

|                    |   |                       |                 |
|--------------------|---|-----------------------|-----------------|
| novel_circ_0005377 | + | ENSG00000007168;      | Con_5Y1,Con_5Y3 |
| novel_circ_0005751 | + | ENSG00000261879;      | Con_5Y1,Con_5Y3 |
| novel_circ_0006011 | + | ENSG00000141337;      | Con_5Y1,Con_5Y3 |
| novel_circ_0005113 | - | ENSG00000153774;      | Con_5Y1,Con_5Y3 |
| novel_circ_0005114 | - | ENSG00000153774;      | Con_5Y1,Con_5Y3 |
| novel_circ_0003526 | + | ENSG00000258526;      | Con_5Y1,Con_5Y3 |
| novel_circ_0003889 | + | ENSG00000066455;      | Con_5Y1,Con_5Y3 |
| novel_circ_0009389 | - | ENSG00000101126;      | Con_5Y1,Con_5Y3 |
| novel_circ_0016102 | - | ENSG00000133624;      | Con_5Y1,Con_5Y3 |
| novel_circ_0016674 | - | ENSG00000003147;      | Con_5Y1,Con_5Y3 |
| novel_circ_0014116 | + | ENSG00000113522;ENSG0 | Con_5Y1,Con_5Y3 |
| novel_circ_0014153 | + | ENSG00000145833;      | Con_5Y1,Con_5Y3 |
| novel_circ_0013627 | - | ENSG00000121892;      | Con_5Y1,Con_5Y3 |
| novel_circ_0013675 | - | ENSG00000145220;      | Con_5Y1,Con_5Y3 |
| novel_circ_0013730 | + | ENSG00000145216;ENSG0 | Con_5Y1,Con_5Y3 |
| novel_circ_0011906 | + | ENSG00000065485;      | Con_5Y1,Con_5Y3 |
| novel_circ_0012254 | - | ENSG00000154310;      | Con_5Y1,Con_5Y3 |
| novel_circ_0010028 | + | ENSG00000170417;      | Con_5Y1,Con_5Y3 |
| novel_circ_0010170 | - | ENSG00000144233;      | Con_5Y1,Con_5Y3 |
| novel_circ_0010231 | + | ENSG00000144224;      | Con_5Y1,Con_5Y3 |
| novel_circ_0010666 | + | ENSG00000144426;      | Con_5Y1,Con_5Y3 |
| novel_circ_0010897 | + | ENSG00000204120;      | Con_5Y1,Con_5Y3 |
| novel_circ_0007300 | + | ENSG00000083444;      | Con_5Y1,Con_5Y3 |
| novel_circ_0007437 | - | ENSG00000116539;      | Con_5Y1,Con_5Y3 |
| novel_circ_0007542 | - | ENSG00000215908;      | Con_5Y1,Con_5Y3 |
| novel_circ_0007739 | + | n/a                   | Con_5Y1,Con_5Y3 |
| novel_circ_0008742 | + | ENSG00000132849;      | Con_5Y1,Con_5Y3 |
| novel_circ_0016946 | + | ENSG00000156787;      | Con_5Y1,Con_5Y3 |
| novel_circ_0016971 | + | ENSG00000104549;      | Con_5Y1,Con_5Y3 |
| novel_circ_0017216 | + | ENSG00000104611;      | Con_5Y1,Con_5Y3 |
| novel_circ_0017628 | + | ENSG00000214954;      | Con_5Y1,Con_5Y3 |
| hsa_circ_0002724   | - | ENSG00000086758;      | Con_5Y2         |
| hsa_circ_0091092   | - | ENSG00000085224;      | Con_5Y2         |
| hsa_circ_0004790   | - | ENSG00000185989;      | Con_5Y2         |
| hsa_circ_0000465   | + | ENSG00000121741;      | Con_5Y2         |
| hsa_circ_0008007   | - | ENSG00000132953;      | Con_5Y2         |
| hsa_circ_0029684   | - | ENSG00000132953;      | Con_5Y2         |
| hsa_circ_0005874   | + | ENSG00000132952;      | Con_5Y2         |
| hsa_circ_0029929   | + | ENSG00000139618;      | Con_5Y2         |
| hsa_circ_0030200   | + | ENSG00000136141;      | Con_5Y2         |
| hsa_circ_0030340   | - | ENSG00000136100;      | Con_5Y2         |
| hsa_circ_0030425   | - | ENSG00000136111;      | Con_5Y2         |
| hsa_circ_0030547   | + | ENSG00000102471;      | Con_5Y2         |
| hsa_circ_0027905   | - | ENSG00000111670;      | Con_5Y2         |
| hsa_circ_0028048   | - | ENSG00000110851;      | Con_5Y2         |
| hsa_circ_0028608   | + | ENSG00000174989;      | Con_5Y2         |
| hsa_circ_0003902   | - | ENSG00000122966;      | Con_5Y2         |
| hsa_circ_0006615   | - | ENSG00000051825;      | Con_5Y2         |
| hsa_circ_0029320   | - | ENSG00000196498;      | Con_5Y2         |
| hsa_circ_0024996   | + | ENSG00000082805;      | Con_5Y2         |
| hsa_circ_0004021   | + | ENSG00000185684;      | Con_5Y2         |
| hsa_circ_0025850   | + | ENSG00000087470;      | Con_5Y2         |
| hsa_circ_0006018   | + | ENSG00000189079;      | Con_5Y2         |
| hsa_circ_0027471   | + | ENSG00000111581;      | Con_5Y2         |
| hsa_circ_0027478   | + | ENSG00000111581;      | Con_5Y2         |
| hsa_circ_0027479   | + | ENSG00000111581;      | Con_5Y2         |
| hsa_circ_0000424   | - | ENSG00000058272;      | Con_5Y2         |
| hsa_circ_0003251   | + | ENSG00000060237;      | Con_5Y2         |



|                  |   |                  |         |
|------------------|---|------------------|---------|
| hsa_circ_0024986 | - | ENSG00000002016; | Con_5Y2 |
| hsa_circ_0024477 | + | ENSG00000095139; | Con_5Y2 |
| hsa_circ_0003015 | + | ENSG00000187079; | Con_5Y2 |
| hsa_circ_0024917 | - | ENSG00000151503; | Con_5Y2 |
| hsa_circ_0021386 | - | ENSG00000011405; | Con_5Y2 |
| hsa_circ_0000279 | - | ENSG00000110756; | Con_5Y2 |
| hsa_circ_0021572 | + | ENSG00000060749; | Con_5Y2 |
| hsa_circ_0020917 | - | ENSG00000110713; | Con_5Y2 |
| hsa_circ_0021929 | - | ENSG00000175216; | Con_5Y2 |
| hsa_circ_0022306 | - | ENSG00000167986; | Con_5Y2 |
| hsa_circ_0022378 | - | ENSG00000149485; | Con_5Y2 |
| hsa_circ_0009159 | + | ENSG00000168005; | Con_5Y2 |
| hsa_circ_0023232 | + | ENSG00000110075; | Con_5Y2 |
| hsa_circ_0004411 | - | ENSG00000110090; | Con_5Y2 |
| hsa_circ_0007722 | - | ENSG00000186635; | Con_5Y2 |
| hsa_circ_0007169 | - | ENSG00000168014; | Con_5Y2 |
| hsa_circ_0000342 | - | ENSG00000149269; | Con_5Y2 |
| hsa_circ_0007767 | - | ENSG00000159063; | Con_5Y2 |
| hsa_circ_0007455 | + | ENSG00000074266; | Con_5Y2 |
| hsa_circ_0020052 | + | ENSG00000148737; | Con_5Y2 |
| hsa_circ_0020250 | - | ENSG00000107669; | Con_5Y2 |
| hsa_circ_0020310 | + | ENSG00000107902; | Con_5Y2 |
| hsa_circ_0020311 | + | ENSG00000107902; | Con_5Y2 |
| hsa_circ_0007825 | - | ENSG00000258539; | Con_5Y2 |
| hsa_circ_0020460 | + | ENSG00000150760; | Con_5Y2 |
| hsa_circ_0001963 | + | ENSG00000148459; | Con_5Y2 |
| hsa_circ_0018019 | - | ENSG00000107890; | Con_5Y2 |
| hsa_circ_0018038 | + | ENSG00000120539; | Con_5Y2 |
| hsa_circ_0005144 | - | ENSG00000171988; | Con_5Y2 |
| hsa_circ_0018761 | + | ENSG00000156026; | Con_5Y2 |
| hsa_circ_0018887 | + | ENSG00000035403; | Con_5Y2 |
| hsa_circ_0019003 | - | ENSG00000062650; | Con_5Y2 |
| hsa_circ_0006293 | + | ENSG00000198060; | Con_5Y2 |
| hsa_circ_0019208 | - | ENSG00000138119; | Con_5Y2 |
| hsa_circ_0000732 | - | ENSG00000074660; | Con_5Y2 |
| hsa_circ_0042419 | - | ENSG00000108599; | Con_5Y2 |
| hsa_circ_0042426 | + | ENSG00000128487; | Con_5Y2 |
| hsa_circ_0004192 | - | ENSG00000070366; | Con_5Y2 |
| hsa_circ_0042838 | + | ENSG00000108582; | Con_5Y2 |
| hsa_circ_0042888 | + | ENSG00000196712; | Con_5Y2 |
| hsa_circ_0043333 | + | ENSG00000274211; | Con_5Y2 |
| hsa_circ_0043462 | + | ENSG00000141736; | Con_5Y2 |
| hsa_circ_0002899 | - | ENSG00000074755; | Con_5Y2 |
| hsa_circ_0041551 | - | ENSG00000185722; | Con_5Y2 |
| hsa_circ_0008601 | - | ENSG00000108883; | Con_5Y2 |
| hsa_circ_0044836 | + | ENSG00000153982; | Con_5Y2 |
| hsa_circ_0045047 | - | ENSG00000108506; | Con_5Y2 |
| hsa_circ_0045409 | - | ENSG00000198265; | Con_5Y2 |
| hsa_circ_0045462 | + | ENSG00000171634; | Con_5Y2 |
| hsa_circ_0008557 | - | ENSG00000161533; | Con_5Y2 |
| hsa_circ_0008891 | + | ENSG00000163597; | Con_5Y2 |
| hsa_circ_0006122 | + | ENSG00000141519; | Con_5Y2 |
| hsa_circ_0046131 | - | ENSG00000157637; | Con_5Y2 |
| hsa_circ_0006462 | - | ENSG00000182446; | Con_5Y2 |
| hsa_circ_0002445 | - | ENSG00000059145; | Con_5Y2 |
| hsa_circ_0038063 | + | ENSG00000072864; | Con_5Y2 |
| hsa_circ_0038247 | - | ENSG00000157106; | Con_5Y2 |
| hsa_circ_0038748 | - | ENSG00000077235; | Con_5Y2 |

|                  |   |                       |         |
|------------------|---|-----------------------|---------|
| hsa_circ_0037563 | + | ENSG00000167978;      | Con_5Y2 |
| hsa_circ_0006982 | - | ENSG00000125107;      | Con_5Y2 |
| hsa_circ_0039914 | + | ENSG00000167264;      | Con_5Y2 |
| hsa_circ_0005615 | + | ENSG00000072736;      | Con_5Y2 |
| hsa_circ_0039945 | + | ENSG00000103064;      | Con_5Y2 |
| hsa_circ_0040082 | - | ENSG00000181019;      | Con_5Y2 |
| hsa_circ_0040191 | - | ENSG00000090861;      | Con_5Y2 |
| hsa_circ_0002505 | - | ENSG00000166747;      | Con_5Y2 |
| hsa_circ_0040498 | - | ENSG00000168411;      | Con_5Y2 |
| hsa_circ_0006418 | - | ENSG00000185418;      | Con_5Y2 |
| hsa_circ_0034065 | + | ENSG00000273749;      | Con_5Y2 |
| hsa_circ_0007659 | + | ENSG00000166922;      | Con_5Y2 |
| hsa_circ_0034557 | + | ENSG00000128829;      | Con_5Y2 |
| hsa_circ_0034604 | + | ENSG00000137812;      | Con_5Y2 |
| hsa_circ_0034967 | + | ENSG00000137822;      | Con_5Y2 |
| hsa_circ_0035055 | + | ENSG00000137770;      | Con_5Y2 |
| hsa_circ_0035572 | - | ENSG00000128915;      | Con_5Y2 |
| hsa_circ_0006487 | - | ENSG00000074603;      | Con_5Y2 |
| hsa_circ_0000640 | - | ENSG00000140386;      | Con_5Y2 |
| hsa_circ_0005889 | + | ENSG00000073417;      | Con_5Y2 |
| hsa_circ_0003679 | + | ENSG00000140526;      | Con_5Y2 |
| hsa_circ_0036926 | - | ENSG00000284946;ENSG0 | Con_5Y2 |
| hsa_circ_0000654 | + | ENSG00000173575;ENSG0 | Con_5Y2 |
| hsa_circ_0003831 | + | ENSG00000078304;      | Con_5Y2 |
| hsa_circ_0003589 | + | ENSG00000197102;      | Con_5Y2 |
| hsa_circ_0004399 | - | ENSG00000070367;      | Con_5Y2 |
| hsa_circ_0032125 | + | ENSG00000027075;      | Con_5Y2 |
| hsa_circ_0032248 | + | ENSG00000033170;      | Con_5Y2 |
| hsa_circ_0032349 | + | ENSG00000029364;      | Con_5Y2 |
| hsa_circ_0032708 | + | ENSG00000119685;      | Con_5Y2 |
| hsa_circ_0032931 | - | ENSG00000165914;      | Con_5Y2 |
| hsa_circ_0033155 | + | ENSG00000066629;      | Con_5Y2 |
| hsa_circ_0049899 | + | ENSG00000127511;      | Con_5Y2 |
| hsa_circ_0000909 | + | ENSG00000099331;      | Con_5Y2 |
| hsa_circ_0002600 | + | ENSG00000105700;      | Con_5Y2 |
| hsa_circ_0008135 | - | ENSG00000051128;      | Con_5Y2 |
| hsa_circ_0005126 | - | ENSG00000105717;      | Con_5Y2 |
| hsa_circ_0008186 | + | ENSG00000104885;      | Con_5Y2 |
| hsa_circ_0050462 | + | ENSG00000257103;      | Con_5Y2 |
| hsa_circ_0008033 | + | ENSG00000105220;      | Con_5Y2 |
| hsa_circ_0003090 | - | ENSG00000011422;      | Con_5Y2 |
| hsa_circ_0051427 | + | ENSG00000104856;      | Con_5Y2 |
| hsa_circ_0051493 | - | ENSG00000012061;      | Con_5Y2 |
| hsa_circ_0048987 | + | ENSG00000032444;      | Con_5Y2 |
| hsa_circ_0008741 | + | ENSG00000101752;      | Con_5Y2 |
| hsa_circ_0047348 | - | ENSG00000118276;      | Con_5Y2 |
| hsa_circ_0047891 | + | ENSG00000081913;      | Con_5Y2 |
| hsa_circ_0005815 | - | ENSG00000141759;      | Con_5Y2 |
| hsa_circ_0046843 | + | ENSG00000101745;      | Con_5Y2 |
| hsa_circ_0006707 | - | ENSG00000154845;      | Con_5Y2 |
| hsa_circ_0001212 | - | ENSG00000228315;ENSG0 | Con_5Y2 |
| hsa_circ_0004208 | + | ENSG00000099956;      | Con_5Y2 |
| hsa_circ_0062608 | + | ENSG00000100014;ENSG0 | Con_5Y2 |
| hsa_circ_0062638 | - | ENSG00000100068;      | Con_5Y2 |
| hsa_circ_0062656 | + | ENSG00000100077;      | Con_5Y2 |
| hsa_circ_0062675 | - | ENSG00000100109;      | Con_5Y2 |
| hsa_circ_0006303 | + | ENSG00000100330;      | Con_5Y2 |
| hsa_circ_0006331 | - | ENSG00000184708;      | Con_5Y2 |

|                  |   |                       |         |
|------------------|---|-----------------------|---------|
| hsa_circ_0063153 | - | ENSG00000100345;      | Con_5Y2 |
| hsa_circ_0001230 | - | ENSG00000100201;      | Con_5Y2 |
| hsa_circ_0063605 | + | ENSG00000100147;      | Con_5Y2 |
| hsa_circ_0001243 | - | n/a                   | Con_5Y2 |
| hsa_circ_0059304 | + | ENSG00000088812;      | Con_5Y2 |
| hsa_circ_0005163 | + | ENSG00000025293;      | Con_5Y2 |
| hsa_circ_0007050 | + | ENSG00000132792;      | Con_5Y2 |
| hsa_circ_0060456 | + | ENSG00000101057;      | Con_5Y2 |
| hsa_circ_0002615 | - | ENSG00000132824;      | Con_5Y2 |
| hsa_circ_0060516 | + | ENSG00000101104;      | Con_5Y2 |
| hsa_circ_0059365 | - | ENSG00000089057;      | Con_5Y2 |
| hsa_circ_0060730 | + | ENSG00000124207;      | Con_5Y2 |
| hsa_circ_0002536 | + | ENSG00000124207;      | Con_5Y2 |
| hsa_circ_0009105 | + | ENSG00000125885;ENSG0 | Con_5Y2 |
| hsa_circ_0006854 | - | ENSG00000130699;      | Con_5Y2 |
| hsa_circ_0008725 | + | ENSG00000159128;      | Con_5Y2 |
| hsa_circ_0061757 | - | ENSG00000185658;      | Con_5Y2 |
| hsa_circ_0007126 | - | ENSG00000160294;      | Con_5Y2 |
| hsa_circ_0081536 | + | ENSG00000146828;      | Con_5Y2 |
| hsa_circ_0007459 | - | ENSG00000091127;      | Con_5Y2 |
| hsa_circ_0081891 | - | ENSG00000164597;      | Con_5Y2 |
| hsa_circ_0082648 | + | ENSG00000157741;      | Con_5Y2 |
| hsa_circ_0082922 | + | ENSG00000133612;      | Con_5Y2 |
| hsa_circ_0005860 | - | ENSG00000286192;ENSG0 | Con_5Y2 |
| hsa_circ_0079572 | + | ENSG00000122550;      | Con_5Y2 |
| hsa_circ_0004869 | + | ENSG00000106263;      | Con_5Y2 |
| hsa_circ_0001956 | + | ENSG00000122547;      | Con_5Y2 |
| hsa_circ_0079336 | + | ENSG00000106346;      | Con_5Y2 |
| hsa_circ_0005619 | + | ENSG00000263001;      | Con_5Y2 |
| hsa_circ_0079074 | + | ENSG00000164828;      | Con_5Y2 |
| hsa_circ_0006991 | + | ENSG00000164465;      | Con_5Y2 |
| hsa_circ_0077825 | - | ENSG00000146376;      | Con_5Y2 |
| hsa_circ_0077851 | - | ENSG00000112282;      | Con_5Y2 |
| hsa_circ_0005753 | + | ENSG00000055208;      | Con_5Y2 |
| hsa_circ_0078208 | - | ENSG00000131013;      | Con_5Y2 |
| hsa_circ_0078297 | + | ENSG00000120254;      | Con_5Y2 |
| hsa_circ_0005472 | - | ENSG00000285441;ENSG0 | Con_5Y2 |
| hsa_circ_0004662 | - | ENSG00000285441;ENSG0 | Con_5Y2 |
| hsa_circ_0075805 | + | ENSG00000112242;      | Con_5Y2 |
| hsa_circ_0076055 | + | ENSG00000065060;      | Con_5Y2 |
| hsa_circ_0076056 | + | ENSG00000065060;      | Con_5Y2 |
| hsa_circ_0076150 | - | ENSG00000096060;      | Con_5Y2 |
| hsa_circ_0004035 | + | ENSG00000170734;      | Con_5Y2 |
| hsa_circ_0075522 | + | ENSG00000153046;      | Con_5Y2 |
| hsa_circ_0077416 | - | ENSG00000112234;      | Con_5Y2 |
| hsa_circ_0006072 | + | ENSG00000151422;      | Con_5Y2 |
| hsa_circ_0005631 | + | ENSG00000038382;      | Con_5Y2 |
| hsa_circ_0071903 | + | ENSG00000038382;      | Con_5Y2 |
| hsa_circ_0074665 | + | ENSG00000145907;      | Con_5Y2 |
| hsa_circ_0074744 | - | ENSG00000082516;      | Con_5Y2 |
| hsa_circ_0006386 | - | ENSG00000120137;      | Con_5Y2 |
| hsa_circ_0075026 | - | ENSG00000072803;      | Con_5Y2 |
| hsa_circ_0072056 | - | ENSG00000113360;      | Con_5Y2 |
| hsa_circ_0072263 | - | ENSG00000113569;      | Con_5Y2 |
| hsa_circ_0072629 | + | ENSG00000086200;      | Con_5Y2 |
| hsa_circ_0072756 | + | ENSG00000145740;      | Con_5Y2 |
| hsa_circ_0073131 | - | ENSG00000152413;      | Con_5Y2 |
| hsa_circ_0073329 | + | ENSG00000164199;      | Con_5Y2 |

|                  |   |                       |         |
|------------------|---|-----------------------|---------|
| hsa_circ_0007668 | - | ENSG00000138785;      | Con_5Y2 |
| hsa_circ_0070574 | - | ENSG00000138785;      | Con_5Y2 |
| hsa_circ_0070649 | + | ENSG00000138802;      | Con_5Y2 |
| hsa_circ_0070916 | + | ENSG00000142731;      | Con_5Y2 |
| hsa_circ_0068842 | + | ENSG00000090316;      | Con_5Y2 |
| hsa_circ_0071198 | - | ENSG00000198589;      | Con_5Y2 |
| hsa_circ_0071228 | - | ENSG00000198589;      | Con_5Y2 |
| hsa_circ_0069397 | - | ENSG00000047365;      | Con_5Y2 |
| hsa_circ_0069032 | - | ENSG00000145220;      | Con_5Y2 |
| hsa_circ_0069651 | - | ENSG00000170448;      | Con_5Y2 |
| hsa_circ_0070111 | + | ENSG00000138759;      | Con_5Y2 |
| hsa_circ_0070132 | + | ENSG00000138759;      | Con_5Y2 |
| hsa_circ_0070303 | - | ENSG00000163625;      | Con_5Y2 |
| hsa_circ_0070388 | - | ENSG00000145332;      | Con_5Y2 |
| hsa_circ_0006387 | + | ENSG00000138641;      | Con_5Y2 |
| hsa_circ_0070440 | - | ENSG00000138640;      | Con_5Y2 |
| hsa_circ_0069191 | - | ENSG00000109667;      | Con_5Y2 |
| hsa_circ_0066701 | + | ENSG00000182504;      | Con_5Y2 |
| hsa_circ_0066986 | - | ENSG00000114030;      | Con_5Y2 |
| hsa_circ_0064360 | - | ENSG00000132155;      | Con_5Y2 |
| hsa_circ_0067347 | + | ENSG00000114670;      | Con_5Y2 |
| hsa_circ_0067900 | - | ENSG00000173889;      | Con_5Y2 |
| hsa_circ_0068355 | + | ENSG00000156931;      | Con_5Y2 |
| hsa_circ_0005286 | - | ENSG00000244405;      | Con_5Y2 |
| hsa_circ_0002381 | + | ENSG00000076242;      | Con_5Y2 |
| hsa_circ_0065140 | - | ENSG00000181555;      | Con_5Y2 |
| hsa_circ_0003311 | + | ENSG00000135968;      | Con_5Y2 |
| hsa_circ_0056199 | + | ENSG00000115091;      | Con_5Y2 |
| hsa_circ_0056709 | + | ENSG00000080345;      | Con_5Y2 |
| hsa_circ_0056714 | + | ENSG00000080345;      | Con_5Y2 |
| hsa_circ_0057050 | + | ENSG00000115827;      | Con_5Y2 |
| hsa_circ_0057510 | + | ENSG00000138386;      | Con_5Y2 |
| hsa_circ_0005395 | + | ENSG00000144426;      | Con_5Y2 |
| hsa_circ_0006734 | + | ENSG00000144426;      | Con_5Y2 |
| hsa_circ_0058175 | + | ENSG00000079246;      | Con_5Y2 |
| hsa_circ_0004783 | - | ENSG00000135913;      | Con_5Y2 |
| hsa_circ_0005355 | - | ENSG00000085449;      | Con_5Y2 |
| hsa_circ_0058518 | + | ENSG00000173744;      | Con_5Y2 |
| hsa_circ_0058691 | + | ENSG00000144535;      | Con_5Y2 |
| hsa_circ_0058699 | + | ENSG00000144535;      | Con_5Y2 |
| hsa_circ_0003585 | + | ENSG00000085978;      | Con_5Y2 |
| hsa_circ_0006014 | - | ENSG00000132323;      | Con_5Y2 |
| hsa_circ_0004461 | + | ENSG00000065802;      | Con_5Y2 |
| hsa_circ_0007159 | + | ENSG00000168397;      | Con_5Y2 |
| hsa_circ_0053297 | + | ENSG00000243943;ENSG0 | Con_5Y2 |
| hsa_circ_0053860 | + | ENSG00000018699;      | Con_5Y2 |
| hsa_circ_0052471 | + | ENSG00000171853;      | Con_5Y2 |
| hsa_circ_0054278 | + | ENSG00000057935;      | Con_5Y2 |
| hsa_circ_0054338 | - | ENSG00000138095;      | Con_5Y2 |
| hsa_circ_0054472 | + | ENSG00000095002;      | Con_5Y2 |
| hsa_circ_0006587 | - | ENSG00000115464;      | Con_5Y2 |
| hsa_circ_0054915 | + | ENSG00000115504;      | Con_5Y2 |
| hsa_circ_0008804 | + | ENSG00000115548;      | Con_5Y2 |
| hsa_circ_0013587 | + | ENSG00000198799;      | Con_5Y2 |
| hsa_circ_0003247 | - | ENSG00000116539;      | Con_5Y2 |
| hsa_circ_0014737 | - | ENSG00000116604;      | Con_5Y2 |
| hsa_circ_0006507 | - | ENSG00000116406;      | Con_5Y2 |
| hsa_circ_0016049 | - | ENSG00000117139;      | Con_5Y2 |

|                    |   |                       |         |
|--------------------|---|-----------------------|---------|
| hsa_circ_0003527   | - | ENSG00000117222;      | Con_5Y2 |
| hsa_circ_0000180   | + | ENSG00000143476;      | Con_5Y2 |
| hsa_circ_0010530   | - | ENSG00000090686;      | Con_5Y2 |
| hsa_circ_0016759   | + | ENSG00000143740;      | Con_5Y2 |
| hsa_circ_0016991   | - | ENSG00000135749;      | Con_5Y2 |
| hsa_circ_0002135   | + | ENSG00000130695;      | Con_5Y2 |
| hsa_circ_0002868   | + | ENSG00000130695;      | Con_5Y2 |
| hsa_circ_0008614   | + | ENSG00000117682;      | Con_5Y2 |
| hsa_circ_0011153   | + | ENSG00000180098;      | Con_5Y2 |
| hsa_circ_0011192   | + | ENSG00000060656;      | Con_5Y2 |
| hsa_circ_0009057   | + | ENSG00000121766;      | Con_5Y2 |
| hsa_circ_0003880   | + | ENSG00000025800;      | Con_5Y2 |
| hsa_circ_0011537   | + | ENSG00000146463;      | Con_5Y2 |
| hsa_circ_0003986   | + | ENSG00000134698;      | Con_5Y2 |
| hsa_circ_0004093   | + | ENSG00000116871;      | Con_5Y2 |
| hsa_circ_0003529   | + | ENSG00000174574;      | Con_5Y2 |
| hsa_circ_0008844   | + | ENSG00000168389;      | Con_5Y2 |
| hsa_circ_0012360   | - | ENSG00000159658;      | Con_5Y2 |
| hsa_circ_0012494   | + | ENSG00000157077;      | Con_5Y2 |
| hsa_circ_0007301   | + | ENSG00000172456;      | Con_5Y2 |
| hsa_circ_0009531   | - | ENSG00000162408;      | Con_5Y2 |
| hsa_circ_0013007   | + | ENSG00000180488;      | Con_5Y2 |
| hsa_circ_0000088   | + | ENSG00000180488;      | Con_5Y2 |
| hsa_circ_0009624   | - | ENSG00000074800;      | Con_5Y2 |
| hsa_circ_0013213   | - | ENSG00000137936;      | Con_5Y2 |
| hsa_circ_0004504   | - | ENSG00000106771;      | Con_5Y2 |
| hsa_circ_0088062   | - | ENSG00000106868;      | Con_5Y2 |
| hsa_circ_0088190   | + | ENSG00000157693;      | Con_5Y2 |
| hsa_circ_0088296   | - | ENSG00000095261;      | Con_5Y2 |
| hsa_circ_0088549   | - | ENSG00000119414;      | Con_5Y2 |
| hsa_circ_0088708   | - | ENSG00000160408;ENSG0 | Con_5Y2 |
| hsa_circ_0089196   | + | ENSG00000130723;      | Con_5Y2 |
| hsa_circ_0089237   | + | ENSG00000130714;      | Con_5Y2 |
| hsa_circ_0089252   | - | ENSG00000107263;      | Con_5Y2 |
| hsa_circ_0089606   | + | ENSG00000127191;      | Con_5Y2 |
| hsa_circ_0086226   | - | ENSG00000080608;      | Con_5Y2 |
| hsa_circ_0086709   | - | ENSG00000137073;      | Con_5Y2 |
| hsa_circ_0086739   | - | ENSG00000137073;      | Con_5Y2 |
| hsa_circ_0086754   | + | ENSG00000164978;      | Con_5Y2 |
| hsa_circ_0087009   | - | ENSG00000159921;      | Con_5Y2 |
| hsa_circ_0087023   | - | ENSG00000137075;      | Con_5Y2 |
| hsa_circ_0003486   | + | ENSG00000147854;      | Con_5Y2 |
| hsa_circ_0087427   | + | ENSG00000106723;      | Con_5Y2 |
| hsa_circ_0007416   | - | ENSG00000127081;      | Con_5Y2 |
| hsa_circ_0087601   | + | ENSG00000182150;      | Con_5Y2 |
| hsa_circ_0009164   | + | ENSG00000164934;      | Con_5Y2 |
| hsa_circ_0007116   | + | ENSG00000105339;      | Con_5Y2 |
| hsa_circ_0005256   | - | ENSG00000171045;      | Con_5Y2 |
| hsa_circ_0005042   | + | ENSG00000147459;      | Con_5Y2 |
| hsa_circ_0083772   | + | ENSG00000168077;      | Con_5Y2 |
| hsa_circ_0006175   | + | ENSG00000147421;      | Con_5Y2 |
| hsa_circ_0084304   | - | ENSG00000253729;      | Con_5Y2 |
| novel_circ_0018630 | + | ENSG00000147224;      | Con_5Y2 |
| novel_circ_0018730 | - | ENSG00000181544;      | Con_5Y2 |
| novel_circ_0018761 | + | ENSG00000169891;      | Con_5Y2 |
| novel_circ_0018796 | + | ENSG00000101868;      | Con_5Y2 |
| novel_circ_0018861 | - | ENSG00000086758;      | Con_5Y2 |
| novel_circ_0018867 | + | ENSG00000227486;      | Con_5Y2 |

|                    |   |                       |         |
|--------------------|---|-----------------------|---------|
| novel_circ_0002803 | + | ENSG00000134900;      | Con_5Y2 |
| novel_circ_0002828 | + | ENSG00000068650;      | Con_5Y2 |
| novel_circ_0002869 | - | ENSG00000132950;      | Con_5Y2 |
| novel_circ_0002893 | + | ENSG00000032742;      | Con_5Y2 |
| novel_circ_0002970 | - | ENSG00000120694;      | Con_5Y2 |
| novel_circ_0003013 | - | ENSG00000120690;      | Con_5Y2 |
| novel_circ_0003051 | + | ENSG00000179630;      | Con_5Y2 |
| novel_circ_0003064 | - | ENSG00000123200;      | Con_5Y2 |
| novel_circ_0003096 | + | ENSG00000102531;      | Con_5Y2 |
| novel_circ_0003151 | - | ENSG00000139734;      | Con_5Y2 |
| novel_circ_0003172 | - | ENSG00000136111;      | Con_5Y2 |
| novel_circ_0003233 | + | ENSG00000102580;      | Con_5Y2 |
| novel_circ_0003269 | + | ENSG00000125304;      | Con_5Y2 |
| novel_circ_0001821 | + | ENSG00000120800;      | Con_5Y2 |
| novel_circ_0001858 | + | ENSG00000198431;      | Con_5Y2 |
| novel_circ_0001903 | + | ENSG00000076555;      | Con_5Y2 |
| novel_circ_0001905 | + | ENSG00000151148;      | Con_5Y2 |
| novel_circ_0001917 | + | ENSG00000122970;      | Con_5Y2 |
| novel_circ_0001936 | - | ENSG00000196850;      | Con_5Y2 |
| novel_circ_0002025 | - | ENSG00000123066;      | Con_5Y2 |
| novel_circ_0002025 | - | ENSG00000123066;      | Con_5Y2 |
| novel_circ_0002029 | - | ENSG00000123066;      | Con_5Y2 |
| novel_circ_0002073 | + | ENSG00000175970;      | Con_5Y2 |
| novel_circ_0002090 | + | ENSG00000256546;      | Con_5Y2 |
| novel_circ_0002216 | + | ENSG00000183495;      | Con_5Y2 |
| novel_circ_0002239 | - | ENSG00000273079;      | Con_5Y2 |
| novel_circ_0002276 | - | ENSG00000111731;      | Con_5Y2 |
| novel_circ_0002281 | - | ENSG00000133703;      | Con_5Y2 |
| novel_circ_0002310 | + | ENSG00000111203;      | Con_5Y2 |
| novel_circ_0002380 | - | ENSG00000073614;      | Con_5Y2 |
| novel_circ_0002456 | + | ENSG00000123352;      | Con_5Y2 |
| novel_circ_0002526 | + | ENSG00000111540;      | Con_5Y2 |
| novel_circ_0002643 | + | ENSG00000127328;      | Con_5Y2 |
| novel_circ_0002657 | - | ENSG00000133858;      | Con_5Y2 |
| novel_circ_0002726 | - | ENSG00000198707;      | Con_5Y2 |
| novel_circ_0001067 | + | ENSG00000149311;      | Con_5Y2 |
| novel_circ_0001098 | + | ENSG00000150768;      | Con_5Y2 |
| novel_circ_0001121 | + | ENSG00000167257;      | Con_5Y2 |
| novel_circ_0001160 | + | ENSG00000196914;      | Con_5Y2 |
| novel_circ_0001161 | + | ENSG00000196914;      | Con_5Y2 |
| novel_circ_0001167 | + | ENSG00000149403;      | Con_5Y2 |
| novel_circ_0001175 | + | ENSG00000285509;ENSG0 | Con_5Y2 |
| novel_circ_0001240 | - | ENSG00000011405;      | Con_5Y2 |
| novel_circ_0001244 | - | ENSG00000011405;      | Con_5Y2 |
| novel_circ_0001246 | + | ENSG00000070081;      | Con_5Y2 |
| novel_circ_0001271 | + | ENSG00000151117;      | Con_5Y2 |
| novel_circ_0001291 | + | ENSG00000053918;      | Con_5Y2 |
| novel_circ_0001314 | + | ENSG00000149100;      | Con_5Y2 |
| novel_circ_0001323 | + | ENSG00000176148;      | Con_5Y2 |
| novel_circ_0001326 | - | ENSG00000176102;      | Con_5Y2 |
| novel_circ_0001373 | - | ENSG00000110713;      | Con_5Y2 |
| novel_circ_0001380 | - | ENSG00000110713;      | Con_5Y2 |
| novel_circ_0001411 | + | ENSG00000151348;      | Con_5Y2 |
| novel_circ_0001425 | - | ENSG00000175216;      | Con_5Y2 |
| novel_circ_0001442 | - | ENSG00000109920;      | Con_5Y2 |
| novel_circ_0001475 | - | ENSG00000167992;      | Con_5Y2 |
| novel_circ_0001518 | + | ENSG00000014216;      | Con_5Y2 |
| novel_circ_0001535 | + | ENSG00000173933;ENSG0 | Con_5Y2 |

|                    |   |                       |         |
|--------------------|---|-----------------------|---------|
| novel_circ_0001574 | + | ENSG00000110075;      | Con_5Y2 |
| novel_circ_0001590 | + | ENSG00000162341;      | Con_5Y2 |
| novel_circ_0001695 | + | ENSG00000165494;      | Con_5Y2 |
| novel_circ_0001735 | - | ENSG00000166436;      | Con_5Y2 |
| novel_circ_0001765 | + | ENSG00000182919;ENSG0 | Con_5Y2 |
| novel_circ_0000093 | + | ENSG00000148700;      | Con_5Y2 |
| novel_circ_0000144 | - | ENSG00000099204;      | Con_5Y2 |
| novel_circ_0000163 | + | ENSG00000107518;      | Con_5Y2 |
| novel_circ_0000175 | - | ENSG00000107560;      | Con_5Y2 |
| novel_circ_0000189 | + | ENSG00000107581;      | Con_5Y2 |
| novel_circ_0000192 | - | ENSG00000107581;      | Con_5Y2 |
| novel_circ_0000214 | - | ENSG00000197771;      | Con_5Y2 |
| novel_circ_0000351 | + | ENSG00000065328;      | Con_5Y2 |
| novel_circ_0000379 | - | ENSG00000152464;ENSG0 | Con_5Y2 |
| novel_circ_0000381 | - | ENSG00000152465;      | Con_5Y2 |
| novel_circ_0000419 | - | ENSG00000136770;      | Con_5Y2 |
| novel_circ_0000438 | + | ENSG00000148459;      | Con_5Y2 |
| novel_circ_0000534 | - | ENSG00000148498;      | Con_5Y2 |
| novel_circ_0000540 | - | ENSG00000148498;      | Con_5Y2 |
| novel_circ_0000656 | - | ENSG00000108091;      | Con_5Y2 |
| novel_circ_0000689 | + | ENSG00000096746;      | Con_5Y2 |
| novel_circ_0000693 | - | ENSG00000204130;      | Con_5Y2 |
| novel_circ_0000698 | - | ENSG00000204130;      | Con_5Y2 |
| novel_circ_0000713 | + | ENSG00000138336;      | Con_5Y2 |
| novel_circ_0000740 | + | ENSG00000165732;      | Con_5Y2 |
| novel_circ_0000753 | - | ENSG00000079332;      | Con_5Y2 |
| novel_circ_0000780 | - | ENSG00000156042;      | Con_5Y2 |
| novel_circ_0000864 | - | ENSG00000138138;      | Con_5Y2 |
| novel_circ_0000908 | - | ENSG00000119912;      | Con_5Y2 |
| novel_circ_0000913 | + | ENSG00000138160;      | Con_5Y2 |
| novel_circ_0000930 | - | ENSG00000148690;      | Con_5Y2 |
| novel_circ_0000937 | + | ENSG00000108239;      | Con_5Y2 |
| novel_circ_0000962 | - | ENSG00000077147;      | Con_5Y2 |
| novel_circ_0000987 | + | ENSG00000023839;      | Con_5Y2 |
| novel_circ_0005339 | - | ENSG00000108599;      | Con_5Y2 |
| novel_circ_0005369 | - | ENSG00000070366;      | Con_5Y2 |
| novel_circ_0005390 | - | ENSG00000004142;      | Con_5Y2 |
| novel_circ_0005480 | + | ENSG00000006125;      | Con_5Y2 |
| novel_circ_0005506 | - | ENSG00000278540;      | Con_5Y2 |
| novel_circ_0005554 | + | ENSG00000094804;      | Con_5Y2 |
| novel_circ_0005555 | + | n/a                   | Con_5Y2 |
| novel_circ_0005563 | - | ENSG00000131747;      | Con_5Y2 |
| novel_circ_0005586 | - | ENSG00000168610;      | Con_5Y2 |
| novel_circ_0005607 | - | ENSG00000132388;      | Con_5Y2 |
| novel_circ_0005632 | - | ENSG00000182963;      | Con_5Y2 |
| novel_circ_0005707 | - | ENSG00000198740;      | Con_5Y2 |
| novel_circ_0005787 | - | ENSG00000121058;      | Con_5Y2 |
| novel_circ_0005812 | - | ENSG00000108395;      | Con_5Y2 |
| novel_circ_0005881 | - | ENSG00000136492;      | Con_5Y2 |
| novel_circ_0005935 | - | ENSG00000136478;      | Con_5Y2 |
| novel_circ_0005982 | - | ENSG00000154240;      | Con_5Y2 |
| novel_circ_0006012 | + | ENSG00000141337;      | Con_5Y2 |
| novel_circ_0006016 | + | ENSG00000108946;      | Con_5Y2 |
| novel_circ_0006021 | - | ENSG00000227036;      | Con_5Y2 |
| novel_circ_0006030 | - | ENSG00000133195;      | Con_5Y2 |
| novel_circ_0006032 | - | ENSG00000133195;      | Con_5Y2 |
| novel_circ_0006061 | - | ENSG00000167699;      | Con_5Y2 |
| novel_circ_0006063 | - | ENSG00000167881;      | Con_5Y2 |

|                    |   |                       |         |
|--------------------|---|-----------------------|---------|
| novel_circ_0006070 | - | ENSG00000129667;      | Con_5Y2 |
| novel_circ_0006111 | + | ENSG00000173821;      | Con_5Y2 |
| novel_circ_0006167 | - | ENSG00000176155;      | Con_5Y2 |
| novel_circ_0004625 | - | ENSG00000059145;      | Con_5Y2 |
| novel_circ_0004697 | + | ENSG00000167186;      | Con_5Y2 |
| novel_circ_0004701 | + | ENSG00000103534;      | Con_5Y2 |
| novel_circ_0004706 | - | ENSG00000103550;      | Con_5Y2 |
| novel_circ_0004716 | + | ENSG00000103197;      | Con_5Y2 |
| novel_circ_0004762 | + | ENSG00000090905;      | Con_5Y2 |
| novel_circ_0004800 | - | n/a                   | Con_5Y2 |
| novel_circ_0004830 | + | ENSG00000103351;      | Con_5Y2 |
| novel_circ_0004865 | - | ENSG00000069329;      | Con_5Y2 |
| novel_circ_0004919 | + | ENSG00000103479;      | Con_5Y2 |
| novel_circ_0004929 | + | ENSG00000140718;      | Con_5Y2 |
| novel_circ_0005004 | + | ENSG00000141076;      | Con_5Y2 |
| novel_circ_0005012 | - | ENSG00000132604;      | Con_5Y2 |
| novel_circ_0005022 | - | ENSG00000127585;      | Con_5Y2 |
| novel_circ_0005056 | + | ENSG00000189091;      | Con_5Y2 |
| novel_circ_0005057 | + | ENSG00000189091;      | Con_5Y2 |
| novel_circ_0005084 | - | ENSG00000090863;      | Con_5Y2 |
| novel_circ_0005136 | + | ENSG00000103150;      | Con_5Y2 |
| novel_circ_0003937 | - | ENSG00000140470;      | Con_5Y2 |
| novel_circ_0003950 | - | ENSG00000140471;      | Con_5Y2 |
| novel_circ_0003990 | - | ENSG00000128731;      | Con_5Y2 |
| novel_circ_0004019 | - | ENSG00000021776;      | Con_5Y2 |
| novel_circ_0004051 | + | ENSG00000137812;      | Con_5Y2 |
| novel_circ_0004129 | - | ENSG00000104133;      | Con_5Y2 |
| novel_circ_0004144 | - | ENSG00000166200;      | Con_5Y2 |
| novel_circ_0004173 | - | ENSG00000138600;      | Con_5Y2 |
| novel_circ_0004193 | - | ENSG00000047346;      | Con_5Y2 |
| novel_circ_0004220 | - | ENSG00000140299;      | Con_5Y2 |
| novel_circ_0004265 | - | ENSG00000169118;ENSG0 | Con_5Y2 |
| novel_circ_0004283 | - | ENSG00000074603;      | Con_5Y2 |
| novel_circ_0004473 | + | ENSG00000169684;      | Con_5Y2 |
| novel_circ_0004562 | + | ENSG00000173575;      | Con_5Y2 |
| novel_circ_0004564 | + | ENSG00000173575;      | Con_5Y2 |
| novel_circ_0004573 | + | ENSG00000140563;      | Con_5Y2 |
| novel_circ_0004582 | - | ENSG00000251209;      | Con_5Y2 |
| novel_circ_0004586 | - | ENSG00000103852;      | Con_5Y2 |
| novel_circ_0003322 | + | ENSG00000197102;      | Con_5Y2 |
| novel_circ_0003332 | + | ENSG00000196663;      | Con_5Y2 |
| novel_circ_0003381 | + | ENSG00000129484;      | Con_5Y2 |
| novel_circ_0003382 | + | ENSG00000129484;      | Con_5Y2 |
| novel_circ_0003406 | - | ENSG00000092036;      | Con_5Y2 |
| novel_circ_0003449 | - | ENSG00000092148;      | Con_5Y2 |
| novel_circ_0003536 | + | ENSG00000187790;      | Con_5Y2 |
| novel_circ_0003538 | - | ENSG00000129534;      | Con_5Y2 |
| novel_circ_0003539 | - | ENSG00000129534;      | Con_5Y2 |
| novel_circ_0003540 | - | ENSG00000129534;      | Con_5Y2 |
| novel_circ_0003567 | - | ENSG00000100485;      | Con_5Y2 |
| novel_circ_0003590 | - | ENSG00000100503;      | Con_5Y2 |
| novel_circ_0003683 | - | n/a                   | Con_5Y2 |
| novel_circ_0003695 | - | ENSG00000125952;      | Con_5Y2 |
| novel_circ_0003718 | + | ENSG00000182185;      | Con_5Y2 |
| novel_circ_0003724 | + | ENSG00000100626;      | Con_5Y2 |
| novel_circ_0003864 | - | ENSG00000165914;      | Con_5Y2 |
| novel_circ_0003882 | - | ENSG00000100815;      | Con_5Y2 |
| novel_circ_0006725 | - | ENSG00000123136;      | Con_5Y2 |



|                    |   |                       |         |
|--------------------|---|-----------------------|---------|
| novel_circ_0006736 | - | ENSG00000171903;      | Con_5Y2 |
| novel_circ_0006757 | + | ENSG00000099331;      | Con_5Y2 |
| novel_circ_0006786 | + | ENSG00000167491;      | Con_5Y2 |
| novel_circ_0006844 | - | ENSG00000105186;      | Con_5Y2 |
| novel_circ_0006854 | - | ENSG00000121289;      | Con_5Y2 |
| novel_circ_0006912 | + | ENSG00000105738;      | Con_5Y2 |
| novel_circ_0006938 | - | ENSG00000123815;      | Con_5Y2 |
| novel_circ_0006943 | + | ENSG00000167600;      | Con_5Y2 |
| novel_circ_0007095 | - | ENSG00000080031;      | Con_5Y2 |
| novel_circ_0007101 | - | ENSG00000130254;      | Con_5Y2 |
| novel_circ_0007110 | + | ENSG00000160633;      | Con_5Y2 |
| novel_circ_0006232 | + | n/a                   | Con_5Y2 |
| novel_circ_0006241 | - | ENSG00000134278;      | Con_5Y2 |
| novel_circ_0006310 | - | ENSG00000079134;      | Con_5Y2 |
| novel_circ_0006340 | + | ENSG00000101773;      | Con_5Y2 |
| novel_circ_0006381 | + | ENSG00000101596;      | Con_5Y2 |
| novel_circ_0006428 | - | ENSG00000152234;      | Con_5Y2 |
| novel_circ_0006453 | - | ENSG00000141627;      | Con_5Y2 |
| novel_circ_0006473 | - | ENSG00000167306;      | Con_5Y2 |
| novel_circ_0006495 | + | ENSG00000101751;      | Con_5Y2 |
| novel_circ_0006517 | - | ENSG00000066926;      | Con_5Y2 |
| novel_circ_0009741 | + | ENSG00000100014;ENSG0 | Con_5Y2 |
| novel_circ_0009749 | + | ENSG00000100028;ENSG0 | Con_5Y2 |
| novel_circ_0009837 | - | ENSG00000233080;      | Con_5Y2 |
| novel_circ_0009892 | + | ENSG00000196236;      | Con_5Y2 |
| novel_circ_0009907 | + | ENSG00000100393;      | Con_5Y2 |
| novel_circ_0009945 | + | ENSG00000248405;ENSG0 | Con_5Y2 |
| novel_circ_0009974 | - | ENSG00000075275;      | Con_5Y2 |
| novel_circ_0009086 | + | ENSG00000149474;      | Con_5Y2 |
| novel_circ_0009202 | + | ENSG00000126001;      | Con_5Y2 |
| novel_circ_0009262 | + | ENSG00000101413;      | Con_5Y2 |
| novel_circ_0009330 | - | ENSG00000101040;      | Con_5Y2 |
| novel_circ_0009334 | - | ENSG00000101040;      | Con_5Y2 |
| novel_circ_0009377 | - | ENSG00000124201;      | Con_5Y2 |
| novel_circ_0009419 | - | ENSG00000101144;      | Con_5Y2 |
| novel_circ_0009434 | + | ENSG00000286235;ENSG0 | Con_5Y2 |
| novel_circ_0009536 | - | ENSG00000142207;      | Con_5Y2 |
| novel_circ_0009578 | + | ENSG00000159259;      | Con_5Y2 |
| novel_circ_0015823 | + | ENSG00000272752;      | Con_5Y2 |
| novel_circ_0015881 | - | ENSG00000135250;      | Con_5Y2 |
| novel_circ_0015937 | - | ENSG00000184903;      | Con_5Y2 |
| novel_circ_0016032 | + | ENSG00000155561;      | Con_5Y2 |
| novel_circ_0016034 | + | ENSG00000155561;      | Con_5Y2 |
| novel_circ_0016170 | + | ENSG00000009335;      | Con_5Y2 |
| novel_circ_0016308 | - | ENSG00000070882;      | Con_5Y2 |
| novel_circ_0016310 | - | ENSG00000070882;      | Con_5Y2 |
| novel_circ_0016399 | + | ENSG00000065883;      | Con_5Y2 |
| novel_circ_0016628 | + | ENSG00000135205;      | Con_5Y2 |
| novel_circ_0016640 | + | ENSG00000127947;      | Con_5Y2 |
| novel_circ_0016648 | + | ENSG00000187257;      | Con_5Y2 |
| novel_circ_0016653 | + | ENSG00000006576;      | Con_5Y2 |
| novel_circ_0016700 | + | ENSG00000105792;      | Con_5Y2 |
| novel_circ_0016717 | + | ENSG00000127914;      | Con_5Y2 |
| novel_circ_0016720 | + | ENSG00000127914;      | Con_5Y2 |
| novel_circ_0016781 | - | ENSG00000198742;      | Con_5Y2 |
| novel_circ_0015051 | + | ENSG00000111907;      | Con_5Y2 |
| novel_circ_0015151 | + | ENSG00000112419;      | Con_5Y2 |
| novel_circ_0015152 | + | ENSG00000135521;      | Con_5Y2 |

|                    |   |                       |         |
|--------------------|---|-----------------------|---------|
| novel_circ_0015198 | + | ENSG00000120254;      | Con_5Y2 |
| novel_circ_0015251 | + | ENSG00000175048;      | Con_5Y2 |
| novel_circ_0015294 | - | ENSG00000092820;      | Con_5Y2 |
| novel_circ_0015327 | + | ENSG00000130396;      | Con_5Y2 |
| novel_circ_0015335 | + | ENSG00000130396;      | Con_5Y2 |
| novel_circ_0015402 | + | ENSG00000250903;      | Con_5Y2 |
| novel_circ_0015437 | - | ENSG00000204463;      | Con_5Y2 |
| novel_circ_0015447 | + | ENSG00000258388;ENSG0 | Con_5Y2 |
| novel_circ_0015449 | - | ENSG00000137266;      | Con_5Y2 |
| novel_circ_0015450 | - | ENSG00000137266;      | Con_5Y2 |
| novel_circ_0015477 | - | ENSG00000096063;      | Con_5Y2 |
| novel_circ_0015492 | - | ENSG00000112079;      | Con_5Y2 |
| novel_circ_0015499 | + | ENSG00000156639;      | Con_5Y2 |
| novel_circ_0015602 | + | ENSG00000112200;      | Con_5Y2 |
| novel_circ_0015636 | + | ENSG00000082269;      | Con_5Y2 |
| novel_circ_0015761 | + | ENSG00000146281;      | Con_5Y2 |
| novel_circ_0014002 | - | ENSG00000186952;      | Con_5Y2 |
| novel_circ_0014068 | + | ENSG00000151292;      | Con_5Y2 |
| novel_circ_0014185 | - | ENSG00000094880;      | Con_5Y2 |
| novel_circ_0014233 | + | ENSG00000254996;ENSG0 | Con_5Y2 |
| novel_circ_0014291 | + | ENSG00000091009;ENSG0 | Con_5Y2 |
| novel_circ_0014298 | + | ENSG00000154124;      | Con_5Y2 |
| novel_circ_0014334 | + | ENSG00000155506;      | Con_5Y2 |
| novel_circ_0014336 | + | ENSG00000155508;      | Con_5Y2 |
| novel_circ_0014370 | - | ENSG00000145555;      | Con_5Y2 |
| novel_circ_0014553 | + | ENSG00000063438;ENSG0 | Con_5Y2 |
| novel_circ_0014687 | + | ENSG00000112851;      | Con_5Y2 |
| novel_circ_0014810 | - | ENSG00000164300;      | Con_5Y2 |
| novel_circ_0013088 | - | ENSG00000109323;      | Con_5Y2 |
| novel_circ_0013117 | - | ENSG00000138801;      | Con_5Y2 |
| novel_circ_0013201 | + | ENSG00000164074;      | Con_5Y2 |
| novel_circ_0013231 | - | n/a                   | Con_5Y2 |
| novel_circ_0013252 | + | ENSG00000164134;      | Con_5Y2 |
| novel_circ_0013437 | - | ENSG00000137601;      | Con_5Y2 |
| novel_circ_0013550 | - | ENSG00000091490;      | Con_5Y2 |
| novel_circ_0013592 | + | ENSG00000169851;      | Con_5Y2 |
| novel_circ_0013758 | - | ENSG00000128059;      | Con_5Y2 |
| novel_circ_0013761 | + | ENSG00000174780;      | Con_5Y2 |
| novel_circ_0013770 | + | ENSG00000248049;      | Con_5Y2 |
| novel_circ_0013773 | + | ENSG00000170871;      | Con_5Y2 |
| novel_circ_0013879 | - | ENSG00000163312;      | Con_5Y2 |
| novel_circ_0013925 | + | ENSG00000163104;      | Con_5Y2 |
| novel_circ_0011770 | + | ENSG00000114354;      | Con_5Y2 |
| novel_circ_0011862 | - | n/a                   | Con_5Y2 |
| novel_circ_0011884 | - | ENSG00000051341;      | Con_5Y2 |
| novel_circ_0011898 | - | ENSG00000114030;      | Con_5Y2 |
| novel_circ_0011966 | - | ENSG00000175792;      | Con_5Y2 |
| novel_circ_0012018 | - | ENSG00000163781;      | Con_5Y2 |
| novel_circ_0012024 | - | ENSG00000163785;      | Con_5Y2 |
| novel_circ_0012034 | - | ENSG00000118007;      | Con_5Y2 |
| novel_circ_0012122 | - | ENSG00000071794;      | Con_5Y2 |
| novel_circ_0012123 | - | ENSG00000071794;      | Con_5Y2 |
| novel_circ_0012124 | - | ENSG00000071794;      | Con_5Y2 |
| novel_circ_0012149 | + | ENSG00000144895;      | Con_5Y2 |
| novel_circ_0012225 | - | n/a                   | Con_5Y2 |
| novel_circ_0012251 | - | ENSG00000173889;      | Con_5Y2 |
| novel_circ_0012320 | + | ENSG00000058056;      | Con_5Y2 |
| novel_circ_0012330 | + | ENSG00000058063;      | Con_5Y2 |

|                    |   |                       |         |
|--------------------|---|-----------------------|---------|
| novel_circ_0012337 | - | ENSG00000053524;      | Con_5Y2 |
| novel_circ_0012364 | + | ENSG00000114867;      | Con_5Y2 |
| novel_circ_0012383 | + | ENSG00000073803;      | Con_5Y2 |
| novel_circ_0012420 | - | ENSG00000133657;      | Con_5Y2 |
| novel_circ_0012436 | - | ENSG00000061938;      | Con_5Y2 |
| novel_circ_0012446 | + | ENSG00000273331;ENSG0 | Con_5Y2 |
| novel_circ_0012534 | - | ENSG00000033867;      | Con_5Y2 |
| novel_circ_0012554 | + | ENSG00000163513;      | Con_5Y2 |
| novel_circ_0012576 | + | ENSG00000152642;      | Con_5Y2 |
| novel_circ_0012587 | + | ENSG00000153551;      | Con_5Y2 |
| novel_circ_0012687 | + | ENSG00000114857;      | Con_5Y2 |
| novel_circ_0012774 | - | ENSG00000173473;      | Con_5Y2 |
| novel_circ_0012777 | - | ENSG00000173473;      | Con_5Y2 |
| novel_circ_0012841 | + | ENSG00000114353;      | Con_5Y2 |
| novel_circ_0012975 | - | ENSG00000151276;      | Con_5Y2 |
| novel_circ_0013025 | - | ENSG00000196220;ENSG0 | Con_5Y2 |
| novel_circ_0013046 | + | ENSG00000241553;      | Con_5Y2 |
| novel_circ_0010015 | - | ENSG00000204634;      | Con_5Y2 |
| novel_circ_0010088 | - | ENSG00000153107;      | Con_5Y2 |
| novel_circ_0010093 | + | ENSG00000144152;      | Con_5Y2 |
| novel_circ_0010120 | + | n/a                   | Con_5Y2 |
| novel_circ_0010121 | + | ENSG00000088179;      | Con_5Y2 |
| novel_circ_0010258 | + | ENSG00000080345;      | Con_5Y2 |
| novel_circ_0010270 | + | ENSG00000080345;      | Con_5Y2 |
| novel_circ_0010357 | + | ENSG00000136560;      | Con_5Y2 |
| novel_circ_0010432 | + | ENSG00000115827;      | Con_5Y2 |
| novel_circ_0010493 | + | ENSG00000138434;      | Con_5Y2 |
| novel_circ_0010502 | - | ENSG00000061676;      | Con_5Y2 |
| novel_circ_0010508 | - | ENSG00000061676;      | Con_5Y2 |
| novel_circ_0010610 | - | ENSG00000115942;      | Con_5Y2 |
| novel_circ_0010678 | + | ENSG00000138443;      | Con_5Y2 |
| novel_circ_0010795 | + | ENSG00000239498;      | Con_5Y2 |
| novel_circ_0010826 | - | ENSG00000036257;      | Con_5Y2 |
| novel_circ_0010876 | + | ENSG00000135931;      | Con_5Y2 |
| novel_circ_0010892 | + | ENSG00000204120;      | Con_5Y2 |
| novel_circ_0010913 | + | ENSG00000119771;      | Con_5Y2 |
| novel_circ_0010966 | - | ENSG00000122085;      | Con_5Y2 |
| novel_circ_0011031 | + | ENSG00000115163;      | Con_5Y2 |
| novel_circ_0011055 | - | ENSG00000171103;      | Con_5Y2 |
| novel_circ_0011147 | + | ENSG00000115760;      | Con_5Y2 |
| novel_circ_0011184 | - | ENSG00000115808;      | Con_5Y2 |
| novel_circ_0011191 | - | ENSG00000055332;      | Con_5Y2 |
| novel_circ_0011206 | + | ENSG00000232973;      | Con_5Y2 |
| novel_circ_0011227 | - | ENSG00000011566;      | Con_5Y2 |
| novel_circ_0011400 | + | ENSG00000162929;      | Con_5Y2 |
| novel_circ_0011412 | + | ENSG00000173209;      | Con_5Y2 |
| novel_circ_0011425 | - | ENSG00000115464;      | Con_5Y2 |
| novel_circ_0011453 | - | ENSG00000082898;      | Con_5Y2 |
| novel_circ_0011474 | - | ENSG00000082898;      | Con_5Y2 |
| novel_circ_0011564 | - | ENSG00000115998;      | Con_5Y2 |
| novel_circ_0011650 | + | ENSG00000168883;      | Con_5Y2 |
| novel_circ_0007190 | + | ENSG00000130939;      | Con_5Y2 |
| novel_circ_0007461 | - | ENSG00000116580;      | Con_5Y2 |
| novel_circ_0007462 | - | ENSG00000116580;      | Con_5Y2 |
| novel_circ_0007466 | - | ENSG00000116580;      | Con_5Y2 |
| novel_circ_0007486 | + | ENSG00000197312;      | Con_5Y2 |
| novel_circ_0007531 | - | ENSG00000248333;      | Con_5Y2 |
| novel_circ_0007535 | - | ENSG00000143183;      | Con_5Y2 |

|                    |   |                       |         |
|--------------------|---|-----------------------|---------|
| novel_circ_0007586 | + | ENSG00000117523;      | Con_5Y2 |
| novel_circ_0007619 | - | ENSG00000135870;      | Con_5Y2 |
| novel_circ_0007663 | + | ENSG00000074964;      | Con_5Y2 |
| novel_circ_0007669 | + | ENSG00000186283;      | Con_5Y2 |
| novel_circ_0007802 | - | ENSG00000118193;      | Con_5Y2 |
| novel_circ_0007805 | - | ENSG00000118193;      | Con_5Y2 |
| novel_circ_0007920 | + | ENSG00000162769;      | Con_5Y2 |
| novel_circ_0007956 | - | ENSG00000090686;      | Con_5Y2 |
| novel_circ_0008000 | - | ENSG00000162923;      | Con_5Y2 |
| novel_circ_0008095 | - | ENSG00000069248;      | Con_5Y2 |
| novel_circ_0008177 | - | ENSG00000054267;      | Con_5Y2 |
| novel_circ_0008199 | + | ENSG00000116984;      | Con_5Y2 |
| novel_circ_0008413 | + | ENSG00000160094;      | Con_5Y2 |
| novel_circ_0008464 | - | ENSG00000163877;      | Con_5Y2 |
| novel_circ_0008653 | - | ENSG00000134744;      | Con_5Y2 |
| novel_circ_0008721 | + | ENSG00000134709;      | Con_5Y2 |
| novel_circ_0008748 | - | ENSG00000116237;      | Con_5Y2 |
| novel_circ_0008758 | - | ENSG00000116641;      | Con_5Y2 |
| novel_circ_0008797 | + | ENSG00000198160;      | Con_5Y2 |
| novel_circ_0008848 | - | ENSG00000077254;      | Con_5Y2 |
| novel_circ_0008994 | + | ENSG00000122483;      | Con_5Y2 |
| novel_circ_0017784 | + | ENSG00000148143;      | Con_5Y2 |
| novel_circ_0017792 | + | ENSG00000119318;      | Con_5Y2 |
| novel_circ_0017855 | - | ENSG00000119314;      | Con_5Y2 |
| novel_circ_0017911 | + | ENSG00000011454;      | Con_5Y2 |
| novel_circ_0017926 | - | ENSG00000165209;      | Con_5Y2 |
| novel_circ_0017947 | - | ENSG00000173611;      | Con_5Y2 |
| novel_circ_0018002 | + | ENSG00000095319;      | Con_5Y2 |
| novel_circ_0018025 | + | ENSG00000130723;      | Con_5Y2 |
| novel_circ_0018043 | - | ENSG00000107290;      | Con_5Y2 |
| novel_circ_0018053 | - | ENSG00000148300;      | Con_5Y2 |
| novel_circ_0018064 | + | ENSG00000186350;      | Con_5Y2 |
| novel_circ_0018087 | - | ENSG00000148396;      | Con_5Y2 |
| novel_circ_0018090 | - | ENSG00000148400;      | Con_5Y2 |
| novel_circ_0018104 | + | ENSG00000181090;      | Con_5Y2 |
| novel_circ_0018199 | + | ENSG00000096872;      | Con_5Y2 |
| novel_circ_0018305 | + | ENSG00000165304;      | Con_5Y2 |
| novel_circ_0018343 | + | ENSG00000120158;      | Con_5Y2 |
| novel_circ_0018365 | + | ENSG00000165072;      | Con_5Y2 |
| novel_circ_0018368 | + | ENSG00000165072;      | Con_5Y2 |
| novel_circ_0018369 | + | ENSG00000198887;      | Con_5Y2 |
| novel_circ_0018406 | + | ENSG00000172159;      | Con_5Y2 |
| novel_circ_0018496 | + | ENSG00000165238;      | Con_5Y2 |
| novel_circ_0018504 | + | ENSG00000048828;      | Con_5Y2 |
| novel_circ_0018545 | + | ENSG00000182150;      | Con_5Y2 |
| novel_circ_0018583 | + | ENSG00000197816;ENSG0 | Con_5Y2 |
| novel_circ_0016800 | - | ENSG00000034677;      | Con_5Y2 |
| novel_circ_0016921 | - | ENSG00000136982;      | Con_5Y2 |
| novel_circ_0017036 | + | ENSG00000129292;      | Con_5Y2 |
| novel_circ_0017071 | - | ENSG00000123908;      | Con_5Y2 |
| novel_circ_0017132 | - | ENSG00000171045;      | Con_5Y2 |
| novel_circ_0017144 | + | ENSG00000179832;      | Con_5Y2 |
| novel_circ_0017205 | + | ENSG00000104728;ENSG0 | Con_5Y2 |
| novel_circ_0017215 | + | ENSG00000104611;      | Con_5Y2 |
| novel_circ_0017245 | + | ENSG00000221914;      | Con_5Y2 |
| novel_circ_0017266 | - | ENSG00000104299;      | Con_5Y2 |
| novel_circ_0017277 | - | ENSG00000251191;      | Con_5Y2 |
| novel_circ_0017313 | - | ENSG00000104221;      | Con_5Y2 |

|                    |   |                       |                 |
|--------------------|---|-----------------------|-----------------|
| novel_circ_0017435 | - | ENSG00000023287;      | Con_5Y2         |
| novel_circ_0017457 | - | n/a                   | Con_5Y2         |
| novel_circ_0017490 | + | ENSG00000066855;      | Con_5Y2         |
| novel_circ_0017521 | + | ENSG00000104218;      | Con_5Y2         |
| novel_circ_0017557 | + | ENSG00000121039;      | Con_5Y2         |
| novel_circ_0017565 | + | ENSG00000104381;      | Con_5Y2         |
| novel_circ_0017599 | + | ENSG00000085719;      | Con_5Y2         |
| novel_circ_0017658 | - | ENSG00000265817;ENSG0 | Con_5Y2         |
| novel_circ_0017659 | - | ENSG00000265817;ENSG0 | Con_5Y2         |
| novel_circ_0017672 | + | ENSG00000104413;      | Con_5Y2         |
| novel_circ_0017684 | + | ENSG00000156170;      | Con_5Y2         |
| hsa_circ_0000503   | + | ENSG00000102606;      | Con_5Y2,Con_5Y3 |
| hsa_circ_0003852   | - | ENSG00000150456;      | Con_5Y2,Con_5Y3 |
| hsa_circ_0004627   | + | ENSG00000120800;      | Con_5Y2,Con_5Y3 |
| hsa_circ_0005824   | - | ENSG00000064115;      | Con_5Y2,Con_5Y3 |
| hsa_circ_0024470   | - | ENSG00000118096;      | Con_5Y2,Con_5Y3 |
| hsa_circ_0002294   | - | ENSG00000110367;      | Con_5Y2,Con_5Y3 |
| hsa_circ_0002332   | + | ENSG00000149554;      | Con_5Y2,Con_5Y3 |
| hsa_circ_0002038   | + | ENSG00000110075;      | Con_5Y2,Con_5Y3 |
| hsa_circ_0021155   | - | ENSG00000166471;      | Con_5Y2,Con_5Y3 |
| hsa_circ_0008115   | + | ENSG00000148459;      | Con_5Y2,Con_5Y3 |
| hsa_circ_0017476   | + | ENSG00000067057;      | Con_5Y2,Con_5Y3 |
| hsa_circ_0018600   | + | ENSG00000156502;      | Con_5Y2,Con_5Y3 |
| hsa_circ_0000247   | + | ENSG00000156026;      | Con_5Y2,Con_5Y3 |
| hsa_circ_0005392   | - | ENSG00000138119;      | Con_5Y2,Con_5Y3 |
| hsa_circ_0006371   | + | ENSG00000196233;      | Con_5Y2,Con_5Y3 |
| hsa_circ_0042253   | - | ENSG00000141030;      | Con_5Y2,Con_5Y3 |
| hsa_circ_0006964   | - | ENSG00000131747;      | Con_5Y2,Con_5Y3 |
| hsa_circ_0004006   | + | ENSG00000170921;      | Con_5Y2,Con_5Y3 |
| hsa_circ_0006761   | + | ENSG00000173821;      | Con_5Y2,Con_5Y3 |
| hsa_circ_0046598   | - | ENSG00000175711;      | Con_5Y2,Con_5Y3 |
| hsa_circ_0000676   | + | ENSG00000103222;      | Con_5Y2,Con_5Y3 |
| hsa_circ_0038872   | + | ENSG00000196296;      | Con_5Y2,Con_5Y3 |
| hsa_circ_0002970   | + | ENSG00000103888;      | Con_5Y2,Con_5Y3 |
| hsa_circ_0004200   | - | ENSG00000247809;      | Con_5Y2,Con_5Y3 |
| hsa_circ_0005670   | + | ENSG00000151413;      | Con_5Y2,Con_5Y3 |
| hsa_circ_0007695   | - | ENSG00000100485;      | Con_5Y2,Con_5Y3 |
| hsa_circ_0049370   | + | ENSG00000127616;      | Con_5Y2,Con_5Y3 |
| hsa_circ_0000881   | + | ENSG00000160633;      | Con_5Y2,Con_5Y3 |
| hsa_circ_0049024   | - | ENSG00000104980;      | Con_5Y2,Con_5Y3 |
| hsa_circ_0062802   | - | ENSG00000100325;      | Con_5Y2,Con_5Y3 |
| hsa_circ_0060068   | - | ENSG00000101019;      | Con_5Y2,Con_5Y3 |
| hsa_circ_0060300   | + | ENSG00000197122;      | Con_5Y2,Con_5Y3 |
| hsa_circ_0007207   | - | ENSG00000156304;      | Con_5Y2,Con_5Y3 |
| hsa_circ_0061687   | - | ENSG00000157538;      | Con_5Y2,Con_5Y3 |
| hsa_circ_0005419   | + | ENSG00000228409;      | Con_5Y2,Con_5Y3 |
| hsa_circ_0075551   | + | ENSG00000124782;      | Con_5Y2,Con_5Y3 |
| hsa_circ_0077101   | + | ENSG00000196586;      | Con_5Y2,Con_5Y3 |
| hsa_circ_0071224   | - | ENSG00000198589;      | Con_5Y2,Con_5Y3 |
| hsa_circ_0069420   | + | ENSG00000065882;      | Con_5Y2,Con_5Y3 |
| hsa_circ_0069649   | - | ENSG00000170448;      | Con_5Y2,Con_5Y3 |
| hsa_circ_0070040   | - | ENSG00000138750;      | Con_5Y2,Con_5Y3 |
| hsa_circ_0007358   | - | ENSG00000074416;      | Con_5Y2,Con_5Y3 |
| hsa_circ_0007818   | - | ENSG00000240303;ENSG0 | Con_5Y2,Con_5Y3 |
| hsa_circ_0064460   | + | ENSG00000177463;      | Con_5Y2,Con_5Y3 |
| hsa_circ_0002622   | - | ENSG00000173889;      | Con_5Y2,Con_5Y3 |
| hsa_circ_0003975   | + | ENSG00000114346;      | Con_5Y2,Con_5Y3 |
| hsa_circ_0008997   | - | ENSG00000173473;      | Con_5Y2,Con_5Y3 |

|                    |   |                       |                 |
|--------------------|---|-----------------------|-----------------|
| hsa_circ_0066535   | - | ENSG00000285708;ENSG0 | Con_5Y2,Con_5Y3 |
| hsa_circ_0056469   | + | ENSG00000136002;      | Con_5Y2,Con_5Y3 |
| hsa_circ_0056586   | + | ENSG00000048991;      | Con_5Y2,Con_5Y3 |
| hsa_circ_0058055   | - | ENSG00000138376;      | Con_5Y2,Con_5Y3 |
| hsa_circ_0053083   | + | ENSG00000138029;      | Con_5Y2,Con_5Y3 |
| hsa_circ_0008559   | + | ENSG00000171132;      | Con_5Y2,Con_5Y3 |
| hsa_circ_0054547   | - | ENSG00000068878;      | Con_5Y2,Con_5Y3 |
| hsa_circ_0014132   | + | ENSG00000143398;      | Con_5Y2,Con_5Y3 |
| hsa_circ_0000162   | + | ENSG00000116191;      | Con_5Y2,Con_5Y3 |
| hsa_circ_0015928   | + | ENSG00000198700;      | Con_5Y2,Con_5Y3 |
| hsa_circ_0011173   | + | ENSG00000159023;      | Con_5Y2,Con_5Y3 |
| hsa_circ_0012152   | + | ENSG00000187147;      | Con_5Y2,Con_5Y3 |
| hsa_circ_0012779   | + | ENSG00000132849;      | Con_5Y2,Con_5Y3 |
| hsa_circ_0003697   | - | ENSG00000136813;      | Con_5Y2,Con_5Y3 |
| hsa_circ_0085311   | + | ENSG00000164830;      | Con_5Y2,Con_5Y3 |
| hsa_circ_0003183   | + | ENSG00000104388;      | Con_5Y2,Con_5Y3 |
| novel_circ_0018866 | + | n/a                   | Con_5Y2,Con_5Y3 |
| novel_circ_0002113 | + | ENSG00000184445;      | Con_5Y2,Con_5Y3 |
| novel_circ_0002735 | - | ENSG00000049130;      | Con_5Y2,Con_5Y3 |
| novel_circ_0002746 | - | ENSG00000139318;      | Con_5Y2,Con_5Y3 |
| novel_circ_0002777 | + | ENSG00000120802;      | Con_5Y2,Con_5Y3 |
| novel_circ_0001042 | - | ENSG00000110660;      | Con_5Y2,Con_5Y3 |
| novel_circ_0001105 | - | ENSG00000048028;      | Con_5Y2,Con_5Y3 |
| novel_circ_0001119 | + | ENSG00000167257;      | Con_5Y2,Con_5Y3 |
| novel_circ_0001512 | + | ENSG00000168439;      | Con_5Y2,Con_5Y3 |
| novel_circ_0005975 | - | ENSG00000154240;      | Con_5Y2,Con_5Y3 |
| novel_circ_0006015 | + | ENSG00000108946;      | Con_5Y2,Con_5Y3 |
| novel_circ_0006044 | + | ENSG00000170190;      | Con_5Y2,Con_5Y3 |
| novel_circ_0004703 | + | ENSG00000103534;      | Con_5Y2,Con_5Y3 |
| novel_circ_0005009 | + | ENSG00000168807;      | Con_5Y2,Con_5Y3 |
| novel_circ_0004058 | - | ENSG00000128908;      | Con_5Y2,Con_5Y3 |
| novel_circ_0006906 | - | ENSG00000245680;ENSG0 | Con_5Y2,Con_5Y3 |
| novel_circ_0006400 | - | ENSG00000153339;      | Con_5Y2,Con_5Y3 |
| novel_circ_0009349 | + | ENSG00000124198;      | Con_5Y2,Con_5Y3 |
| novel_circ_0009443 | - | ENSG00000130699;      | Con_5Y2,Con_5Y3 |
| novel_circ_0009682 | + | ENSG00000160299;      | Con_5Y2,Con_5Y3 |
| novel_circ_0015737 | - | ENSG00000135316;      | Con_5Y2,Con_5Y3 |
| novel_circ_0013150 | - | ENSG00000145349;      | Con_5Y2,Con_5Y3 |
| novel_circ_0013661 | - | ENSG00000163697;      | Con_5Y2,Con_5Y3 |
| novel_circ_0013870 | - | ENSG00000189308;      | Con_5Y2,Con_5Y3 |
| novel_circ_0012915 | - | ENSG00000174839;      | Con_5Y2,Con_5Y3 |
| novel_circ_0010188 | - | ENSG00000152102;      | Con_5Y2,Con_5Y3 |
| novel_circ_0011622 | - | ENSG00000114993;      | Con_5Y2,Con_5Y3 |
| novel_circ_0011714 | + | ENSG00000121152;      | Con_5Y2,Con_5Y3 |
| novel_circ_0011758 | - | ENSG00000135945;      | Con_5Y2,Con_5Y3 |
| novel_circ_0007359 | + | ENSG00000163125;      | Con_5Y2,Con_5Y3 |
| novel_circ_0007384 | + | ENSG00000159352;      | Con_5Y2,Con_5Y3 |
| novel_circ_0007419 | + | ENSG00000116138;      | Con_5Y2,Con_5Y3 |
| novel_circ_0008323 | + | ENSG00000130766;      | Con_5Y2,Con_5Y3 |
| novel_circ_0018062 | + | ENSG00000186350;      | Con_5Y2,Con_5Y3 |
| novel_circ_0018262 | - | ENSG00000137073;      | Con_5Y2,Con_5Y3 |
| novel_circ_0018274 | - | ENSG00000186638;      | Con_5Y2,Con_5Y3 |
| novel_circ_0016813 | - | ENSG00000070756;      | Con_5Y2,Con_5Y3 |
| novel_circ_0017496 | - | ENSG00000185697;      | Con_5Y2,Con_5Y3 |
| novel_circ_0017502 | + | ENSG00000104218;      | Con_5Y2,Con_5Y3 |
| novel_circ_0017662 | - | ENSG00000164944;      | Con_5Y2,Con_5Y3 |
| hsa_circ_0091366   | + | ENSG00000131725;      | Con_5Y3         |
| hsa_circ_0089902   | + | ENSG00000046651;      | Con_5Y3         |

|                  |   |                       |         |
|------------------|---|-----------------------|---------|
| hsa_circ_0090360 | - | ENSG00000065923;      | Con_5Y3 |
| hsa_circ_0002532 | + | n/a                   | Con_5Y3 |
| hsa_circ_0008420 | + | ENSG00000175198;      | Con_5Y3 |
| hsa_circ_0029617 | - | ENSG00000121390;      | Con_5Y3 |
| hsa_circ_0030585 | - | ENSG00000125257;      | Con_5Y3 |
| hsa_circ_0002349 | - | ENSG00000120860;      | Con_5Y3 |
| hsa_circ_0002957 | - | ENSG00000084112;      | Con_5Y3 |
| hsa_circ_0029146 | + | ENSG00000130783;      | Con_5Y3 |
| hsa_circ_0029160 | - | ENSG00000150967;      | Con_5Y3 |
| hsa_circ_0029463 | + | ENSG00000183495;      | Con_5Y3 |
| hsa_circ_0025582 | + | ENSG00000257046;ENSG0 | Con_5Y3 |
| hsa_circ_0025705 | - | ENSG00000064115;      | Con_5Y3 |
| hsa_circ_0025034 | - | ENSG00000111206;      | Con_5Y3 |
| hsa_circ_0025783 | - | ENSG00000110888;      | Con_5Y3 |
| hsa_circ_0026276 | + | ENSG00000066084;      | Con_5Y3 |
| hsa_circ_0027352 | + | ENSG00000135655;      | Con_5Y3 |
| hsa_circ_0020914 | - | ENSG00000110713;      | Con_5Y3 |
| hsa_circ_0004637 | - | ENSG00000110713;      | Con_5Y3 |
| hsa_circ_0003555 | - | ENSG00000175216;      | Con_5Y3 |
| hsa_circ_0004988 | - | ENSG00000166889;      | Con_5Y3 |
| hsa_circ_0023059 | + | ENSG00000173120;      | Con_5Y3 |
| hsa_circ_0008648 | + | ENSG00000166025;      | Con_5Y3 |
| hsa_circ_0019614 | - | ENSG00000198408;      | Con_5Y3 |
| hsa_circ_0019764 | - | ENSG00000138175;      | Con_5Y3 |
| hsa_circ_0020150 | - | ENSG00000107581;      | Con_5Y3 |
| hsa_circ_0000267 | - | ENSG00000189319;ENSG0 | Con_5Y3 |
| hsa_circ_0004583 | - | ENSG00000175029;      | Con_5Y3 |
| hsa_circ_0017555 | - | ENSG00000196372;      | Con_5Y3 |
| hsa_circ_0017599 | + | ENSG00000134452;      | Con_5Y3 |
| hsa_circ_0017605 | + | ENSG00000134453;      | Con_5Y3 |
| hsa_circ_0008629 | + | ENSG00000138134;      | Con_5Y3 |
| hsa_circ_0003505 | - | ENSG00000124422;      | Con_5Y3 |
| hsa_circ_0043427 | - | ENSG00000125686;      | Con_5Y3 |
| hsa_circ_0043509 | + | ENSG00000108349;      | Con_5Y3 |
| hsa_circ_0041539 | - | ENSG00000185722;      | Con_5Y3 |
| hsa_circ_0003899 | + | ENSG00000067596;      | Con_5Y3 |
| hsa_circ_0044796 | + | ENSG00000108384;      | Con_5Y3 |
| hsa_circ_0045012 | - | ENSG00000136492;      | Con_5Y3 |
| hsa_circ_0007534 | + | ENSG00000198231;      | Con_5Y3 |
| hsa_circ_0041822 | - | ENSG00000215041;      | Con_5Y3 |
| hsa_circ_0045559 | + | ENSG00000109062;      | Con_5Y3 |
| hsa_circ_0045774 | - | ENSG00000182473;      | Con_5Y3 |
| hsa_circ_0046395 | - | ENSG00000141551;      | Con_5Y3 |
| hsa_circ_0046521 | + | ENSG00000141556;      | Con_5Y3 |
| hsa_circ_0046596 | + | ENSG00000141556;      | Con_5Y3 |
| hsa_circ_0042072 | + | ENSG00000154914;      | Con_5Y3 |
| hsa_circ_0037830 | + | ENSG00000038532;      | Con_5Y3 |
| hsa_circ_0007865 | - | ENSG00000063854;      | Con_5Y3 |
| hsa_circ_0004049 | + | ENSG00000174628;      | Con_5Y3 |
| hsa_circ_0038929 | + | ENSG00000079616;      | Con_5Y3 |
| hsa_circ_0003617 | - | ENSG00000103126;      | Con_5Y3 |
| hsa_circ_0039402 | + | ENSG00000140718;      | Con_5Y3 |
| hsa_circ_0039921 | + | ENSG00000167264;      | Con_5Y3 |
| hsa_circ_0040480 | - | ENSG00000168411;      | Con_5Y3 |
| hsa_circ_0040919 | + | ENSG00000170100;      | Con_5Y3 |
| hsa_circ_0003784 | - | ENSG00000104133;      | Con_5Y3 |
| hsa_circ_0003879 | + | ENSG00000138592;      | Con_5Y3 |
| hsa_circ_0003916 | + | ENSG00000033800;      | Con_5Y3 |

|                  |   |                       |         |
|------------------|---|-----------------------|---------|
| hsa_circ_0000641 | - | ENSG00000140391;      | Con_5Y3 |
| hsa_circ_0003590 | + | ENSG00000041357;      | Con_5Y3 |
| hsa_circ_0036984 | + | ENSG00000173575;      | Con_5Y3 |
| hsa_circ_0004110 | + | ENSG00000126777;      | Con_5Y3 |
| hsa_circ_0005205 | + | ENSG00000100644;      | Con_5Y3 |
| hsa_circ_0032135 | + | ENSG00000100644;      | Con_5Y3 |
| hsa_circ_0032201 | + | ENSG00000100714;      | Con_5Y3 |
| hsa_circ_0032529 | + | ENSG00000258653;ENSG0 | Con_5Y3 |
| hsa_circ_0006706 | - | ENSG00000100596;      | Con_5Y3 |
| hsa_circ_0005682 | - | ENSG00000011114;      | Con_5Y3 |
| hsa_circ_0049267 | - | ENSG00000079999;      | Con_5Y3 |
| hsa_circ_0000910 | + | ENSG00000099331;      | Con_5Y3 |
| hsa_circ_0005063 | - | ENSG00000064607;      | Con_5Y3 |
| hsa_circ_0050590 | + | ENSG00000105699;      | Con_5Y3 |
| hsa_circ_0050803 | + | ENSG00000105738;      | Con_5Y3 |
| hsa_circ_0050899 | + | ENSG00000130402;      | Con_5Y3 |
| hsa_circ_0002837 | - | ENSG00000105329;      | Con_5Y3 |
| hsa_circ_0006240 | + | ENSG00000167670;      | Con_5Y3 |
| hsa_circ_0007568 | + | ENSG00000104805;      | Con_5Y3 |
| hsa_circ_0048113 | - | ENSG00000175221;      | Con_5Y3 |
| hsa_circ_0046941 | + | ENSG00000141404;      | Con_5Y3 |
| hsa_circ_0006937 | - | ENSG00000141385;      | Con_5Y3 |
| hsa_circ_0046977 | - | ENSG00000101624;      | Con_5Y3 |
| hsa_circ_0047133 | + | ENSG00000101773;      | Con_5Y3 |
| hsa_circ_0047288 | - | ENSG00000141447;      | Con_5Y3 |
| hsa_circ_0047315 | - | ENSG00000141380;      | Con_5Y3 |
| hsa_circ_0046733 | + | ENSG00000101596;      | Con_5Y3 |
| hsa_circ_0003552 | + | ENSG00000075643;      | Con_5Y3 |
| hsa_circ_0062685 | - | ENSG00000180957;      | Con_5Y3 |
| hsa_circ_0003468 | - | ENSG00000100325;      | Con_5Y3 |
| hsa_circ_0062983 | + | ENSG00000100225;      | Con_5Y3 |
| hsa_circ_0063206 | + | ENSG00000100083;      | Con_5Y3 |
| hsa_circ_0002811 | + | ENSG00000239900;      | Con_5Y3 |
| hsa_circ_0002610 | - | ENSG00000100266;      | Con_5Y3 |
| hsa_circ_0002246 | + | ENSG00000130638;      | Con_5Y3 |
| hsa_circ_0063781 | + | ENSG00000186951;      | Con_5Y3 |
| hsa_circ_0059660 | - | ENSG00000100997;      | Con_5Y3 |
| hsa_circ_0060518 | + | ENSG00000101104;      | Con_5Y3 |
| hsa_circ_0060816 | + | ENSG00000197818;      | Con_5Y3 |
| hsa_circ_0004871 | + | ENSG00000149657;      | Con_5Y3 |
| hsa_circ_0061570 | + | ENSG00000205726;      | Con_5Y3 |
| hsa_circ_0008021 | + | ENSG00000160209;      | Con_5Y3 |
| hsa_circ_0008254 | - | ENSG00000135250;      | Con_5Y3 |
| hsa_circ_0081861 | + | ENSG00000135249;      | Con_5Y3 |
| hsa_circ_0082490 | - | ENSG00000080802;      | Con_5Y3 |
| hsa_circ_0082707 | - | ENSG00000157800;      | Con_5Y3 |
| hsa_circ_0007123 | - | ENSG00000055609;      | Con_5Y3 |
| hsa_circ_0002852 | + | ENSG00000136261;      | Con_5Y3 |
| hsa_circ_0001688 | + | ENSG00000105926;      | Con_5Y3 |
| hsa_circ_0079739 | + | ENSG00000254959;ENSG0 | Con_5Y3 |
| hsa_circ_0004150 | + | ENSG00000146757;      | Con_5Y3 |
| hsa_circ_0005493 | + | ENSG00000196367;      | Con_5Y3 |
| hsa_circ_0075617 | + | ENSG00000153157;ENSG0 | Con_5Y3 |
| hsa_circ_0077817 | - | ENSG00000152894;      | Con_5Y3 |
| hsa_circ_0078017 | - | ENSG00000135597;      | Con_5Y3 |
| hsa_circ_0078367 | + | ENSG00000213079;      | Con_5Y3 |
| hsa_circ_0005685 | + | ENSG00000146426;      | Con_5Y3 |
| hsa_circ_0002971 | + | ENSG00000130340;      | Con_5Y3 |



|                  |   |                       |         |
|------------------|---|-----------------------|---------|
| hsa_circ_0075705 | - | ENSG00000124789;      | Con_5Y3 |
| hsa_circ_0075456 | + | ENSG00000124535;      | Con_5Y3 |
| hsa_circ_0003886 | + | ENSG00000137275;      | Con_5Y3 |
| hsa_circ_0077141 | - | ENSG00000146247;      | Con_5Y3 |
| hsa_circ_0077237 | - | ENSG00000135317;      | Con_5Y3 |
| hsa_circ_0075356 | + | ENSG00000113300;      | Con_5Y3 |
| hsa_circ_0072282 | - | ENSG00000113569;      | Con_5Y3 |
| hsa_circ_0002121 | - | ENSG00000083720;      | Con_5Y3 |
| hsa_circ_0004230 | + | ENSG00000086200;      | Con_5Y3 |
| hsa_circ_0072925 | + | ENSG00000083312;      | Con_5Y3 |
| hsa_circ_0007662 | + | ENSG00000164134;      | Con_5Y3 |
| hsa_circ_0071279 | + | ENSG00000164144;      | Con_5Y3 |
| hsa_circ_0071311 | + | ENSG00000121210;      | Con_5Y3 |
| hsa_circ_0006234 | + | ENSG00000109762;      | Con_5Y3 |
| hsa_circ_0068890 | + | ENSG00000109685;      | Con_5Y3 |
| hsa_circ_0068793 | + | ENSG00000174227;      | Con_5Y3 |
| hsa_circ_0069117 | + | ENSG00000132405;      | Con_5Y3 |
| hsa_circ_0066636 | + | ENSG00000036054;      | Con_5Y3 |
| hsa_circ_0066970 | + | ENSG00000145088;      | Con_5Y3 |
| hsa_circ_0005028 | + | ENSG00000154743;      | Con_5Y3 |
| hsa_circ_0004046 | + | ENSG00000177463;      | Con_5Y3 |
| hsa_circ_0064491 | - | ENSG00000131373;      | Con_5Y3 |
| hsa_circ_0067835 | - | ENSG00000068885;      | Con_5Y3 |
| hsa_circ_0067841 | + | ENSG00000113810;      | Con_5Y3 |
| hsa_circ_0065263 | - | ENSG00000173473;      | Con_5Y3 |
| hsa_circ_0065932 | + | ENSG00000164080;      | Con_5Y3 |
| hsa_circ_0055934 | - | ENSG00000115652;      | Con_5Y3 |
| hsa_circ_0001075 | + | ENSG00000135999;      | Con_5Y3 |
| hsa_circ_0056731 | - | ENSG00000283228;ENSG0 | Con_5Y3 |
| hsa_circ_0056957 | - | ENSG00000138399;      | Con_5Y3 |
| hsa_circ_0057551 | + | ENSG00000196950;      | Con_5Y3 |
| hsa_circ_0057741 | - | ENSG00000155744;      | Con_5Y3 |
| hsa_circ_0003747 | + | ENSG00000138380;      | Con_5Y3 |
| hsa_circ_0054428 | - | ENSG00000068784;      | Con_5Y3 |
| hsa_circ_0054963 | + | ENSG00000119844;      | Con_5Y3 |
| hsa_circ_0055055 | - | ENSG00000198380;      | Con_5Y3 |
| hsa_circ_0000970 | + | ENSG00000151692;      | Con_5Y3 |
| hsa_circ_0055820 | - | ENSG00000115514;      | Con_5Y3 |
| hsa_circ_0004437 | + | ENSG00000163125;      | Con_5Y3 |
| hsa_circ_0007277 | + | ENSG00000143164;      | Con_5Y3 |
| hsa_circ_0015157 | - | ENSG00000143156;      | Con_5Y3 |
| hsa_circ_0005794 | + | ENSG00000076321;      | Con_5Y3 |
| hsa_circ_0015285 | + | ENSG00000117593;      | Con_5Y3 |
| hsa_circ_0003777 | - | ENSG00000127481;      | Con_5Y3 |
| hsa_circ_0002815 | + | ENSG00000058668;      | Con_5Y3 |
| hsa_circ_0010466 | - | ENSG00000075151;      | Con_5Y3 |
| hsa_circ_0006962 | - | ENSG00000162923;      | Con_5Y3 |
| hsa_circ_0002577 | - | ENSG00000162923;      | Con_5Y3 |
| hsa_circ_0016750 | - | ENSG00000143776;      | Con_5Y3 |
| hsa_circ_0016960 | - | ENSG00000135749;      | Con_5Y3 |
| hsa_circ_0011401 | + | ENSG00000116478;      | Con_5Y3 |
| hsa_circ_0004013 | - | ENSG00000116514;      | Con_5Y3 |
| hsa_circ_0004660 | - | ENSG00000142687;      | Con_5Y3 |
| hsa_circ_0003494 | - | ENSG00000085840;      | Con_5Y3 |
| hsa_circ_0009530 | - | ENSG00000162408;      | Con_5Y3 |
| hsa_circ_0003114 | - | ENSG00000162408;      | Con_5Y3 |
| hsa_circ_0088041 | - | ENSG00000106868;      | Con_5Y3 |
| hsa_circ_0088087 | + | ENSG00000119471;      | Con_5Y3 |

|                    |   |                       |         |
|--------------------|---|-----------------------|---------|
| hsa_circ_0086645   | + | ENSG00000086102;      | Con_5Y3 |
| hsa_circ_0005739   | + | ENSG00000136938;      | Con_5Y3 |
| hsa_circ_0001818   | - | ENSG00000104517;      | Con_5Y3 |
| hsa_circ_0001825   | - | ENSG00000066827;      | Con_5Y3 |
| hsa_circ_0085703   | - | ENSG00000167632;      | Con_5Y3 |
| hsa_circ_0083258   | + | ENSG00000283239;ENSG0 | Con_5Y3 |
| novel_circ_0018624 | - | ENSG00000133131;      | Con_5Y3 |
| novel_circ_0018757 | + | ENSG00000086712;      | Con_5Y3 |
| novel_circ_0018832 | - | ENSG00000069509;      | Con_5Y3 |
| novel_circ_0018855 | - | ENSG00000072501;      | Con_5Y3 |
| novel_circ_0003110 | - | ENSG00000102753;      | Con_5Y3 |
| novel_circ_0001805 | - | n/a                   | Con_5Y3 |
| novel_circ_0001830 | + | ENSG00000136048;      | Con_5Y3 |
| novel_circ_0001995 | - | ENSG00000173064;      | Con_5Y3 |
| novel_circ_0002031 | - | ENSG00000111412;      | Con_5Y3 |
| novel_circ_0002079 | + | ENSG00000170633;      | Con_5Y3 |
| novel_circ_0002128 | + | ENSG00000130783;      | Con_5Y3 |
| novel_circ_0002129 | + | ENSG00000130783;      | Con_5Y3 |
| novel_circ_0002130 | + | ENSG00000130783;      | Con_5Y3 |
| novel_circ_0002134 | - | n/a                   | Con_5Y3 |
| novel_circ_0002272 | + | ENSG00000111726;      | Con_5Y3 |
| novel_circ_0002443 | + | ENSG00000152556;      | Con_5Y3 |
| novel_circ_0002446 | - | ENSG00000174233;      | Con_5Y3 |
| novel_circ_0002484 | + | ENSG00000161813;      | Con_5Y3 |
| novel_circ_0002519 | + | ENSG00000256417;      | Con_5Y3 |
| novel_circ_0002610 | + | n/a                   | Con_5Y3 |
| novel_circ_0001043 | - | ENSG00000110321;      | Con_5Y3 |
| novel_circ_0001091 | + | ENSG00000170145;      | Con_5Y3 |
| novel_circ_0001270 | - | ENSG00000151116;      | Con_5Y3 |
| novel_circ_0001292 | - | ENSG00000121621;      | Con_5Y3 |
| novel_circ_0001308 | - | ENSG00000205531;      | Con_5Y3 |
| novel_circ_0001359 | + | ENSG00000026508;      | Con_5Y3 |
| novel_circ_0001471 | - | ENSG00000167987;      | Con_5Y3 |
| novel_circ_0001548 | + | ENSG00000110717;      | Con_5Y3 |
| novel_circ_0000022 | - | ENSG00000186862;      | Con_5Y3 |
| novel_circ_0000044 | - | ENSG00000198408;      | Con_5Y3 |
| novel_circ_0000168 | - | ENSG00000187164;      | Con_5Y3 |
| novel_circ_0000308 | - | ENSG00000089876;      | Con_5Y3 |
| novel_circ_0000340 | + | ENSG00000132334;      | Con_5Y3 |
| novel_circ_0000368 | + | ENSG00000152455;      | Con_5Y3 |
| novel_circ_0000466 | - | ENSG00000169126;      | Con_5Y3 |
| novel_circ_0000728 | + | ENSG00000060339;      | Con_5Y3 |
| novel_circ_0000730 | + | ENSG00000060339;      | Con_5Y3 |
| novel_circ_0000779 | - | ENSG00000122882;      | Con_5Y3 |
| novel_circ_0000804 | + | ENSG00000156110;      | Con_5Y3 |
| novel_circ_0000876 | + | ENSG00000138182;      | Con_5Y3 |
| novel_circ_0000890 | + | ENSG00000095564;      | Con_5Y3 |
| novel_circ_0005273 | - | ENSG00000272636;      | Con_5Y3 |
| novel_circ_0005516 | - | ENSG00000278540;      | Con_5Y3 |
| novel_circ_0005591 | + | ENSG00000033627;      | Con_5Y3 |
| novel_circ_0005824 | + | ENSG00000108406;      | Con_5Y3 |
| novel_circ_0005903 | - | ENSG00000108510;      | Con_5Y3 |
| novel_circ_0005911 | - | ENSG00000141252;      | Con_5Y3 |
| novel_circ_0005944 | + | ENSG00000258890;      | Con_5Y3 |
| novel_circ_0006171 | - | ENSG00000141551;      | Con_5Y3 |
| novel_circ_0004890 | + | ENSG00000102910;      | Con_5Y3 |
| novel_circ_0004936 | - | ENSG00000125124;      | Con_5Y3 |
| novel_circ_0005150 | - | ENSG00000131148;      | Con_5Y3 |

|                    |   |                       |         |
|--------------------|---|-----------------------|---------|
| novel_circ_0005222 | + | ENSG00000197912;      | Con_5Y3 |
| novel_circ_0005225 | + | ENSG00000185324;      | Con_5Y3 |
| novel_circ_0004074 | + | ENSG00000137815;      | Con_5Y3 |
| novel_circ_0004084 | + | ENSG00000159433;      | Con_5Y3 |
| novel_circ_0004106 | + | ENSG00000092470;      | Con_5Y3 |
| novel_circ_0004131 | - | ENSG00000104133;      | Con_5Y3 |
| novel_circ_0004360 | + | ENSG00000137807;      | Con_5Y3 |
| novel_circ_0004416 | - | ENSG00000169375;      | Con_5Y3 |
| novel_circ_0004468 | + | ENSG00000136381;      | Con_5Y3 |
| novel_circ_0003333 | + | ENSG00000089902;      | Con_5Y3 |
| novel_circ_0003616 | - | ENSG00000237356;      | Con_5Y3 |
| novel_circ_0003623 | - | ENSG00000198554;      | Con_5Y3 |
| novel_circ_0003686 | + | ENSG00000054654;      | Con_5Y3 |
| novel_circ_0003802 | + | ENSG00000119685;      | Con_5Y3 |
| novel_circ_0003907 | + | ENSG00000090060;      | Con_5Y3 |
| novel_circ_0003932 | - | ENSG00000205476;      | Con_5Y3 |
| novel_circ_0006748 | + | ENSG00000127511;      | Con_5Y3 |
| novel_circ_0006777 | - | ENSG00000064607;      | Con_5Y3 |
| novel_circ_0006826 | + | ENSG00000172009;      | Con_5Y3 |
| novel_circ_0006893 | - | n/a                   | Con_5Y3 |
| novel_circ_0006913 | - | ENSG00000011332;      | Con_5Y3 |
| novel_circ_0007038 | - | ENSG00000074219;      | Con_5Y3 |
| novel_circ_0007045 | - | ENSG00000268006;      | Con_5Y3 |
| novel_circ_0007130 | - | ENSG00000031823;      | Con_5Y3 |
| novel_circ_0006236 | - | ENSG00000141385;      | Con_5Y3 |
| novel_circ_0006437 | - | ENSG00000078043;      | Con_5Y3 |
| novel_circ_0006543 | + | ENSG00000141664;      | Con_5Y3 |
| novel_circ_0006625 | + | ENSG00000017797;      | Con_5Y3 |
| novel_circ_0009805 | + | ENSG00000100330;      | Con_5Y3 |
| novel_circ_0009904 | + | ENSG00000100393;      | Con_5Y3 |
| novel_circ_0009910 | - | ENSG00000100401;      | Con_5Y3 |
| novel_circ_0009950 | + | ENSG00000100376;      | Con_5Y3 |
| novel_circ_0009426 | - | ENSG00000101160;      | Con_5Y3 |
| novel_circ_0009556 | - | ENSG00000142188;      | Con_5Y3 |
| novel_circ_0015828 | - | ENSG00000196411;      | Con_5Y3 |
| novel_circ_0015902 | - | ENSG00000091127;      | Con_5Y3 |
| novel_circ_0016192 | - | ENSG00000117868;      | Con_5Y3 |
| novel_circ_0016322 | - | ENSG00000078399;ENSG0 | Con_5Y3 |
| novel_circ_0016388 | - | ENSG00000228878;      | Con_5Y3 |
| novel_circ_0016630 | + | ENSG00000135205;      | Con_5Y3 |
| novel_circ_0016646 | + | ENSG00000187257;      | Con_5Y3 |
| novel_circ_0016654 | + | ENSG00000006576;      | Con_5Y3 |
| novel_circ_0016718 | + | ENSG00000127914;      | Con_5Y3 |
| novel_circ_0016725 | - | ENSG00000001631;ENSG0 | Con_5Y3 |
| novel_circ_0014953 | + | ENSG00000112297;      | Con_5Y3 |
| novel_circ_0015011 | - | ENSG00000153975;      | Con_5Y3 |
| novel_circ_0015406 | + | ENSG00000112312;      | Con_5Y3 |
| novel_circ_0015518 | + | ENSG00000024048;      | Con_5Y3 |
| novel_circ_0015765 | - | ENSG00000112159;      | Con_5Y3 |
| novel_circ_0013972 | + | ENSG00000145495;      | Con_5Y3 |
| novel_circ_0014155 | + | ENSG00000145833;      | Con_5Y3 |
| novel_circ_0014189 | + | ENSG00000120733;      | Con_5Y3 |
| novel_circ_0014214 | + | ENSG00000015479;ENSG0 | Con_5Y3 |
| novel_circ_0014235 | - | ENSG00000131504;      | Con_5Y3 |
| novel_circ_0014275 | - | n/a                   | Con_5Y3 |
| novel_circ_0014321 | + | ENSG00000145907;      | Con_5Y3 |
| novel_circ_0014329 | + | ENSG00000155506;      | Con_5Y3 |
| novel_circ_0014343 | + | ENSG00000055163;      | Con_5Y3 |

|                    |   |                       |         |
|--------------------|---|-----------------------|---------|
| novel_circ_0014365 | + | ENSG00000113328;      | Con_5Y3 |
| novel_circ_0014490 | - | ENSG00000113360;      | Con_5Y3 |
| novel_circ_0014610 | + | ENSG00000039123;      | Con_5Y3 |
| novel_circ_0014615 | - | ENSG00000134352;      | Con_5Y3 |
| novel_circ_0014659 | + | ENSG00000112877;      | Con_5Y3 |
| novel_circ_0014673 | + | ENSG00000113597;      | Con_5Y3 |
| novel_circ_0014754 | - | ENSG00000198780;      | Con_5Y3 |
| novel_circ_0014785 | - | ENSG00000132842;      | Con_5Y3 |
| novel_circ_0014797 | - | ENSG00000132837;      | Con_5Y3 |
| novel_circ_0014828 | + | ENSG00000113318;      | Con_5Y3 |
| novel_circ_0014876 | - | ENSG00000113391;      | Con_5Y3 |
| novel_circ_0013087 | - | ENSG00000109323;      | Con_5Y3 |
| novel_circ_0013198 | - | ENSG00000164073;      | Con_5Y3 |
| novel_circ_0013239 | + | ENSG00000163945;      | Con_5Y3 |
| novel_circ_0013392 | - | ENSG00000170088;      | Con_5Y3 |
| novel_circ_0013478 | - | ENSG00000164323;      | Con_5Y3 |
| novel_circ_0013551 | - | ENSG00000091490;      | Con_5Y3 |
| novel_circ_0013830 | + | ENSG00000138758;      | Con_5Y3 |
| novel_circ_0013838 | - | ENSG00000118816;      | Con_5Y3 |
| novel_circ_0011771 | + | ENSG00000114354;      | Con_5Y3 |
| novel_circ_0011817 | + | ENSG00000197548;      | Con_5Y3 |
| novel_circ_0011824 | - | ENSG00000206530;ENSG0 | Con_5Y3 |
| novel_circ_0011885 | - | ENSG00000051341;      | Con_5Y3 |
| novel_circ_0012070 | - | ENSG00000114107;      | Con_5Y3 |
| novel_circ_0012205 | + | ENSG00000168827;      | Con_5Y3 |
| novel_circ_0012214 | + | ENSG00000113810;      | Con_5Y3 |
| novel_circ_0012240 | - | ENSG00000173889;      | Con_5Y3 |
| novel_circ_0012462 | + | ENSG00000180370;      | Con_5Y3 |
| novel_circ_0012600 | + | ENSG00000182973;      | Con_5Y3 |
| novel_circ_0012670 | + | ENSG00000114742;      | Con_5Y3 |
| novel_circ_0012683 | - | ENSG00000168038;      | Con_5Y3 |
| novel_circ_0012911 | + | n/a                   | Con_5Y3 |
| novel_circ_0012976 | - | ENSG00000151276;      | Con_5Y3 |
| novel_circ_0013032 | + | ENSG00000169379;      | Con_5Y3 |
| novel_circ_0013040 | + | ENSG00000163719;      | Con_5Y3 |
| novel_circ_0010147 | - | ENSG00000074054;      | Con_5Y3 |
| novel_circ_0010317 | + | ENSG00000115159;      | Con_5Y3 |
| novel_circ_0010631 | + | ENSG00000055044;      | Con_5Y3 |
| novel_circ_0010781 | + | n/a                   | Con_5Y3 |
| novel_circ_0010832 | - | ENSG00000036257;      | Con_5Y3 |
| novel_circ_0010852 | - | ENSG00000153827;      | Con_5Y3 |
| novel_circ_0010921 | - | ENSG00000119778;      | Con_5Y3 |
| novel_circ_0010996 | + | ENSG00000084676;      | Con_5Y3 |
| novel_circ_0011010 | - | ENSG00000119772;      | Con_5Y3 |
| novel_circ_0011242 | + | ENSG00000057935;      | Con_5Y3 |
| novel_circ_0011354 | + | ENSG00000162869;      | Con_5Y3 |
| novel_circ_0011521 | + | ENSG00000169764;      | Con_5Y3 |
| novel_circ_0011659 | - | ENSG00000132305;      | Con_5Y3 |
| novel_circ_0011740 | - | ENSG00000135951;      | Con_5Y3 |
| novel_circ_0007396 | + | ENSG00000142621;      | Con_5Y3 |
| novel_circ_0007628 | + | ENSG00000152061;      | Con_5Y3 |
| novel_circ_0007678 | + | ENSG00000057252;      | Con_5Y3 |
| novel_circ_0007765 | + | ENSG00000116747;      | Con_5Y3 |
| novel_circ_0007769 | + | ENSG00000134371;      | Con_5Y3 |
| novel_circ_0007828 | + | ENSG00000077157;      | Con_5Y3 |
| novel_circ_0008011 | + | ENSG00000185842;      | Con_5Y3 |
| novel_circ_0008104 | + | ENSG00000004487;ENSG0 | Con_5Y3 |
| novel_circ_0008293 | - | ENSG00000117614;      | Con_5Y3 |

|                    |   |                       |          |
|--------------------|---|-----------------------|----------|
| novel_circ_0008327 | + | ENSG00000204138;      | Con_5Y3  |
| novel_circ_0008368 | - | ENSG00000134644;      | Con_5Y3  |
| novel_circ_0008446 | - | ENSG00000162591;      | Con_5Y3  |
| novel_circ_0008497 | + | ENSG00000084073;      | Con_5Y3  |
| novel_circ_0008794 | + | ENSG00000198160;      | Con_5Y3  |
| novel_circ_0008987 | - | ENSG00000067208;      | Con_5Y3  |
| novel_circ_0017888 | - | ENSG00000119396;      | Con_5Y3  |
| novel_circ_0017913 | + | ENSG00000011454;      | Con_5Y3  |
| novel_circ_0018088 | - | ENSG00000148396;      | Con_5Y3  |
| novel_circ_0018312 | + | ENSG00000165304;      | Con_5Y3  |
| novel_circ_0016847 | - | ENSG00000155096;      | Con_5Y3  |
| novel_circ_0016947 | + | ENSG00000156787;      | Con_5Y3  |
| novel_circ_0017138 | - | ENSG00000254812;      | Con_5Y3  |
| novel_circ_0017176 | + | ENSG00000155975;      | Con_5Y3  |
| novel_circ_0017232 | + | ENSG00000147454;      | Con_5Y3  |
| novel_circ_0017270 | + | ENSG00000147421;      | Con_5Y3  |
| novel_circ_0017424 | + | ENSG00000169139;      | Con_5Y3  |
| novel_circ_0017529 | - | ENSG00000066777;      | Con_5Y3  |
| novel_circ_0017543 | - | ENSG00000140396;      | Con_5Y3  |
| novel_circ_0017586 | + | ENSG00000133739;      | Con_5Y3  |
| novel_circ_0017588 | + | ENSG00000185015;      | Con_5Y3  |
| hsa_circ_0089978   | - | ENSG00000102098;      | CVB5_5Y1 |
| hsa_circ_0090183   | + | ENSG00000250349;ENSG0 | CVB5_5Y1 |
| hsa_circ_0091113   | - | ENSG00000102158;      | CVB5_5Y1 |
| hsa_circ_0008744   | + | ENSG00000134900;      | CVB5_5Y1 |
| hsa_circ_0031011   | - | ENSG00000150401;      | CVB5_5Y1 |
| hsa_circ_0030065   | + | ENSG00000172766;      | CVB5_5Y1 |
| hsa_circ_0030409   | + | ENSG00000083535;      | CVB5_5Y1 |
| hsa_circ_0030741   | + | ENSG00000125304;      | CVB5_5Y1 |
| hsa_circ_0029222   | - | ENSG00000139697;      | CVB5_5Y1 |
| hsa_circ_0000460   | + | ENSG00000185344;      | CVB5_5Y1 |
| hsa_circ_0029568   | - | ENSG00000090615;      | CVB5_5Y1 |
| hsa_circ_0026326   | + | ENSG00000196876;      | CVB5_5Y1 |
| hsa_circ_0004296   | - | ENSG00000134954;      | CVB5_5Y1 |
| hsa_circ_0020766   | - | ENSG00000078902;      | CVB5_5Y1 |
| hsa_circ_0004960   | - | ENSG00000110713;      | CVB5_5Y1 |
| hsa_circ_0022054   | - | ENSG00000109920;      | CVB5_5Y1 |
| hsa_circ_0023180   | + | ENSG00000162337;      | CVB5_5Y1 |
| hsa_circ_0008391   | + | ENSG00000110075;      | CVB5_5Y1 |
| hsa_circ_0023559   | - | ENSG00000168014;      | CVB5_5Y1 |
| hsa_circ_0023928   | - | ENSG00000073921;      | CVB5_5Y1 |
| hsa_circ_0020022   | + | ENSG00000108055;      | CVB5_5Y1 |
| hsa_circ_0004676   | + | ENSG00000181192;      | CVB5_5Y1 |
| hsa_circ_0018440   | - | ENSG00000151150;      | CVB5_5Y1 |
| hsa_circ_0018581   | + | ENSG00000165732;      | CVB5_5Y1 |
| hsa_circ_0018620   | + | ENSG00000156515;      | CVB5_5Y1 |
| hsa_circ_0005828   | - | ENSG00000062650;      | CVB5_5Y1 |
| hsa_circ_0004202   | - | ENSG00000107929;      | CVB5_5Y1 |
| hsa_circ_0004224   | - | ENSG00000107864;      | CVB5_5Y1 |
| hsa_circ_0004445   | - | ENSG00000167193;      | CVB5_5Y1 |
| hsa_circ_0044767   | - | ENSG00000011143;      | CVB5_5Y1 |
| hsa_circ_0044956   | - | ENSG00000170832;      | CVB5_5Y1 |
| hsa_circ_0045309   | + | ENSG00000258890;      | CVB5_5Y1 |
| hsa_circ_0003646   | + | ENSG00000167889;      | CVB5_5Y1 |
| hsa_circ_0045938   | - | ENSG00000055483;      | CVB5_5Y1 |
| hsa_circ_0039635   | - | ENSG00000125107;      | CVB5_5Y1 |
| hsa_circ_0040364   | - | ENSG00000040199;      | CVB5_5Y1 |
| hsa_circ_0034699   | - | ENSG00000137806;      | CVB5_5Y1 |

|                  |   |                       |          |
|------------------|---|-----------------------|----------|
| hsa_circ_0002891 | + | ENSG00000167004;      | CVB5_5Y1 |
| hsa_circ_0008693 | - | ENSG00000092439;      | CVB5_5Y1 |
| hsa_circ_0004456 | - | ENSG00000129003;      | CVB5_5Y1 |
| hsa_circ_0037007 | + | ENSG00000173575;      | CVB5_5Y1 |
| hsa_circ_0031638 | - | ENSG00000198604;      | CVB5_5Y1 |
| hsa_circ_0049475 | + | ENSG00000130175;      | CVB5_5Y1 |
| hsa_circ_0049891 | + | ENSG00000105072;      | CVB5_5Y1 |
| hsa_circ_0000928 | + | ENSG00000167595;      | CVB5_5Y1 |
| hsa_circ_0051220 | + | ENSG00000142046;ENSG0 | CVB5_5Y1 |
| hsa_circ_0003999 | + | ENSG00000008382;      | CVB5_5Y1 |
| hsa_circ_0002979 | + | ENSG00000213892;      | CVB5_5Y1 |
| hsa_circ_0004551 | - | ENSG00000105355;      | CVB5_5Y1 |
| hsa_circ_0052189 | - | ENSG00000105048;      | CVB5_5Y1 |
| hsa_circ_0048780 | - | ENSG00000196365;      | CVB5_5Y1 |
| hsa_circ_0048965 | - | ENSG00000171105;      | CVB5_5Y1 |
| hsa_circ_0047748 | + | ENSG00000091157;      | CVB5_5Y1 |
| hsa_circ_0062937 | - | ENSG00000183530;      | CVB5_5Y1 |
| hsa_circ_0063328 | - | ENSG00000100201;      | CVB5_5Y1 |
| hsa_circ_0002406 | + | ENSG00000054611;      | CVB5_5Y1 |
| hsa_circ_0059577 | + | ENSG00000088970;      | CVB5_5Y1 |
| hsa_circ_0006922 | + | ENSG00000171456;      | CVB5_5Y1 |
| hsa_circ_0007051 | + | ENSG00000101447;      | CVB5_5Y1 |
| hsa_circ_0060896 | - | ENSG00000054793;      | CVB5_5Y1 |
| hsa_circ_0061025 | - | ENSG00000130699;      | CVB5_5Y1 |
| hsa_circ_0081856 | - | ENSG00000091127;      | CVB5_5Y1 |
| hsa_circ_0082447 | + | ENSG00000131558;      | CVB5_5Y1 |
| hsa_circ_0082865 | + | ENSG00000204946;      | CVB5_5Y1 |
| hsa_circ_0005096 | + | ENSG00000136243;      | CVB5_5Y1 |
| hsa_circ_0005366 | + | ENSG00000164543;      | CVB5_5Y1 |
| hsa_circ_0078143 | - | ENSG00000146414;      | CVB5_5Y1 |
| hsa_circ_0075680 | - | ENSG00000047579;      | CVB5_5Y1 |
| hsa_circ_0075728 | - | ENSG00000124789;      | CVB5_5Y1 |
| hsa_circ_0004209 | - | ENSG00000213676;      | CVB5_5Y1 |
| hsa_circ_0074893 | + | ENSG00000113643;      | CVB5_5Y1 |
| hsa_circ_0075332 | - | ENSG00000197226;      | CVB5_5Y1 |
| hsa_circ_0075388 | - | ENSG00000204628;      | CVB5_5Y1 |
| hsa_circ_0070605 | + | ENSG00000164022;      | CVB5_5Y1 |
| hsa_circ_0005669 | + | ENSG00000109466;      | CVB5_5Y1 |
| hsa_circ_0068896 | + | ENSG00000109685;      | CVB5_5Y1 |
| hsa_circ_0070051 | + | ENSG00000138771;      | CVB5_5Y1 |
| hsa_circ_0070057 | + | ENSG00000138758;      | CVB5_5Y1 |
| hsa_circ_0002515 | - | ENSG00000196526;      | CVB5_5Y1 |
| hsa_circ_0070261 | - | ENSG00000189308;      | CVB5_5Y1 |
| hsa_circ_0004577 | + | ENSG00000118762;      | CVB5_5Y1 |
| hsa_circ_0001425 | - | ENSG00000138642;      | CVB5_5Y1 |
| hsa_circ_0006132 | + | ENSG00000173193;      | CVB5_5Y1 |
| hsa_circ_0064346 | + | ENSG00000154743;      | CVB5_5Y1 |
| hsa_circ_0007210 | - | ENSG00000241288;      | CVB5_5Y1 |
| hsa_circ_0068255 | - | ENSG00000175193;ENSG0 | CVB5_5Y1 |
| hsa_circ_0068259 | - | ENSG00000114770;      | CVB5_5Y1 |
| hsa_circ_0003636 | - | ENSG00000160746;      | CVB5_5Y1 |
| hsa_circ_0065926 | + | ENSG00000164080;      | CVB5_5Y1 |
| hsa_circ_0056290 | - | ENSG00000074054;      | CVB5_5Y1 |
| hsa_circ_0007814 | - | ENSG00000121988;      | CVB5_5Y1 |
| hsa_circ_0008459 | - | ENSG00000144445;      | CVB5_5Y1 |
| hsa_circ_0004526 | + | ENSG00000162804;      | CVB5_5Y1 |
| hsa_circ_0054499 | - | ENSG00000138081;      | CVB5_5Y1 |
| hsa_circ_0055471 | - | ENSG00000068654;      | CVB5_5Y1 |

|                    |   |                       |          |
|--------------------|---|-----------------------|----------|
| hsa_circ_0009689   | + | ENSG00000130939;      | CVB5_5Y1 |
| hsa_circ_0013646   | - | ENSG00000009307;      | CVB5_5Y1 |
| hsa_circ_0004222   | + | ENSG00000048707;      | CVB5_5Y1 |
| hsa_circ_0010039   | - | ENSG00000132906;      | CVB5_5Y1 |
| hsa_circ_0014684   | + | ENSG00000260238;ENSG0 | CVB5_5Y1 |
| hsa_circ_0007921   | + | ENSG00000197965;      | CVB5_5Y1 |
| hsa_circ_0006924   | + | ENSG00000135837;      | CVB5_5Y1 |
| hsa_circ_0011361   | + | ENSG00000084652;      | CVB5_5Y1 |
| hsa_circ_0011692   | - | ENSG00000196182;      | CVB5_5Y1 |
| hsa_circ_0000082   | + | ENSG00000185483;      | CVB5_5Y1 |
| hsa_circ_0013107   | + | ENSG00000065243;      | CVB5_5Y1 |
| hsa_circ_0013200   | + | ENSG00000122483;      | CVB5_5Y1 |
| hsa_circ_0088613   | + | ENSG00000196814;      | CVB5_5Y1 |
| hsa_circ_0086397   | + | ENSG00000164975;      | CVB5_5Y1 |
| hsa_circ_0086241   | - | ENSG00000080298;      | CVB5_5Y1 |
| hsa_circ_0003624   | + | ENSG00000107341;      | CVB5_5Y1 |
| hsa_circ_0003084   | + | ENSG00000107036;      | CVB5_5Y1 |
| hsa_circ_0087400   | - | ENSG00000135052;      | CVB5_5Y1 |
| hsa_circ_0005411   | + | ENSG00000012232;      | CVB5_5Y1 |
| hsa_circ_0001803   | + | ENSG00000254087;      | CVB5_5Y1 |
| hsa_circ_0084867   | - | ENSG00000104320;      | CVB5_5Y1 |
| novel_circ_0018775 | - | ENSG00000147010;      | CVB5_5Y1 |
| novel_circ_0018805 | + | ENSG00000101868;      | CVB5_5Y1 |
| novel_circ_0018895 | - | ENSG00000085224;      | CVB5_5Y1 |
| novel_circ_0018932 | + | ENSG00000146950;      | CVB5_5Y1 |
| novel_circ_0002850 | - | ENSG00000183087;      | CVB5_5Y1 |
| novel_circ_0002971 | - | ENSG00000120694;      | CVB5_5Y1 |
| novel_circ_0002973 | - | ENSG00000120694;      | CVB5_5Y1 |
| novel_circ_0003073 | - | ENSG00000123200;      | CVB5_5Y1 |
| novel_circ_0003120 | + | ENSG00000176124;      | CVB5_5Y1 |
| novel_circ_0002058 | - | ENSG00000089154;      | CVB5_5Y1 |
| novel_circ_0002425 | - | ENSG00000111371;      | CVB5_5Y1 |
| novel_circ_0002451 | - | ENSG00000139636;      | CVB5_5Y1 |
| novel_circ_0002517 | + | ENSG00000197111;ENSG0 | CVB5_5Y1 |
| novel_circ_0002654 | + | ENSG00000127329;      | CVB5_5Y1 |
| novel_circ_0002727 | - | ENSG00000198707;      | CVB5_5Y1 |
| novel_circ_0002743 | - | ENSG00000049130;      | CVB5_5Y1 |
| novel_circ_0001026 | + | ENSG00000133805;      | CVB5_5Y1 |
| novel_circ_0001037 | - | ENSG00000152404;      | CVB5_5Y1 |
| novel_circ_0001269 | - | ENSG00000151116;      | CVB5_5Y1 |
| novel_circ_0001414 | - | ENSG00000135365;      | CVB5_5Y1 |
| novel_circ_0001593 | + | ENSG00000110092;      | CVB5_5Y1 |
| novel_circ_0001607 | - | ENSG00000162105;      | CVB5_5Y1 |
| novel_circ_0001656 | - | ENSG00000149269;      | CVB5_5Y1 |
| novel_circ_0001758 | + | ENSG00000166004;      | CVB5_5Y1 |
| novel_circ_0001771 | + | ENSG00000284057;ENSG0 | CVB5_5Y1 |
| novel_circ_0000380 | - | ENSG00000152465;      | CVB5_5Y1 |
| novel_circ_0000678 | + | ENSG00000096717;      | CVB5_5Y1 |
| novel_circ_0000963 | - | ENSG00000077147;      | CVB5_5Y1 |
| novel_circ_0005355 | - | ENSG00000124422;      | CVB5_5Y1 |
| novel_circ_0005438 | + | ENSG00000176208;      | CVB5_5Y1 |
| novel_circ_0005553 | - | ENSG00000074755;      | CVB5_5Y1 |
| novel_circ_0005699 | + | ENSG00000082641;      | CVB5_5Y1 |
| novel_circ_0005744 | - | ENSG00000011258;      | CVB5_5Y1 |
| novel_circ_0005761 | + | ENSG00000029725;      | CVB5_5Y1 |
| novel_circ_0005797 | + | ENSG00000108384;      | CVB5_5Y1 |
| novel_circ_0005818 | - | ENSG00000108395;      | CVB5_5Y1 |
| novel_circ_0005971 | - | ENSG00000198920;      | CVB5_5Y1 |

|                    |   |                       |          |
|--------------------|---|-----------------------|----------|
| novel_circ_0005991 | - | ENSG00000198265;      | CVB5_5Y1 |
| novel_circ_0006048 | + | ENSG00000125450;      | CVB5_5Y1 |
| novel_circ_0006051 | + | ENSG00000073350;      | CVB5_5Y1 |
| novel_circ_0006054 | - | ENSG00000108469;      | CVB5_5Y1 |
| novel_circ_0006149 | + | ENSG00000185298;      | CVB5_5Y1 |
| novel_circ_0006168 | - | ENSG00000176155;      | CVB5_5Y1 |
| novel_circ_0004627 | - | ENSG00000059145;      | CVB5_5Y1 |
| novel_circ_0004639 | + | ENSG00000103429;      | CVB5_5Y1 |
| novel_circ_0004715 | - | ENSG00000007392;      | CVB5_5Y1 |
| novel_circ_0004720 | + | ENSG00000102897;      | CVB5_5Y1 |
| novel_circ_0004753 | - | ENSG00000083093;      | CVB5_5Y1 |
| novel_circ_0004866 | - | ENSG00000069345;      | CVB5_5Y1 |
| novel_circ_0005152 | - | ENSG00000103248;      | CVB5_5Y1 |
| novel_circ_0005198 | - | ENSG00000187555;      | CVB5_5Y1 |
| novel_circ_0004125 | + | ENSG00000104131;      | CVB5_5Y1 |
| novel_circ_0004135 | + | ENSG00000171763;      | CVB5_5Y1 |
| novel_circ_0004192 | - | ENSG00000047346;      | CVB5_5Y1 |
| novel_circ_0004422 | - | ENSG00000260269;      | CVB5_5Y1 |
| novel_circ_0004477 | + | ENSG00000166557;      | CVB5_5Y1 |
| novel_circ_0003357 | + | ENSG00000126214;      | CVB5_5Y1 |
| novel_circ_0003615 | - | ENSG00000237356;      | CVB5_5Y1 |
| novel_circ_0003762 | + | ENSG00000119707;      | CVB5_5Y1 |
| novel_circ_0003851 | + | ENSG00000100722;      | CVB5_5Y1 |
| novel_circ_0006689 | - | ENSG00000197933;      | CVB5_5Y1 |
| novel_circ_0006712 | + | ENSG00000104957;      | CVB5_5Y1 |
| novel_circ_0006731 | - | ENSG00000141867;      | CVB5_5Y1 |
| novel_circ_0006820 | - | ENSG00000176619;      | CVB5_5Y1 |
| novel_circ_0007070 | - | ENSG00000105426;      | CVB5_5Y1 |
| novel_circ_0007092 | - | ENSG00000105048;      | CVB5_5Y1 |
| novel_circ_0007148 | + | n/a                   | CVB5_5Y1 |
| novel_circ_0007149 | - | ENSG00000142449;      | CVB5_5Y1 |
| novel_circ_0006581 | + | ENSG00000130856;      | CVB5_5Y1 |
| novel_circ_0009735 | + | ENSG00000099991;      | CVB5_5Y1 |
| novel_circ_0009836 | - | ENSG00000233080;      | CVB5_5Y1 |
| novel_circ_0009847 | - | ENSG00000100065;      | CVB5_5Y1 |
| novel_circ_0009873 | + | ENSG00000100226;      | CVB5_5Y1 |
| novel_circ_0009884 | + | ENSG00000284431;ENSG0 | CVB5_5Y1 |
| novel_circ_0009989 | + | ENSG00000224271;      | CVB5_5Y1 |
| novel_circ_0009128 | - | ENSG00000282826;      | CVB5_5Y1 |
| novel_circ_0009459 | + | ENSG00000101187;      | CVB5_5Y1 |
| novel_circ_0009470 | - | ENSG00000101210;      | CVB5_5Y1 |
| novel_circ_0009490 | + | ENSG00000155313;      | CVB5_5Y1 |
| novel_circ_0009673 | - | ENSG00000160294;      | CVB5_5Y1 |
| novel_circ_0015832 | - | ENSG00000106397;      | CVB5_5Y1 |
| novel_circ_0015851 | - | ENSG00000161040;      | CVB5_5Y1 |
| novel_circ_0016035 | + | ENSG00000155561;      | CVB5_5Y1 |
| novel_circ_0016087 | + | ENSG00000055130;      | CVB5_5Y1 |
| novel_circ_0016245 | - | ENSG00000286192;ENSG0 | CVB5_5Y1 |
| novel_circ_0016620 | - | ENSG00000127952;      | CVB5_5Y1 |
| novel_circ_0014964 | - | ENSG00000025796;      | CVB5_5Y1 |
| novel_circ_0014974 | + | ENSG00000153157;ENSG0 | CVB5_5Y1 |
| novel_circ_0015073 | - | ENSG00000152894;      | CVB5_5Y1 |
| novel_circ_0015218 | - | ENSG00000155906;      | CVB5_5Y1 |
| novel_circ_0015290 | + | ENSG00000164674;      | CVB5_5Y1 |
| novel_circ_0015329 | + | ENSG00000130396;      | CVB5_5Y1 |
| novel_circ_0015357 | + | ENSG00000112584;      | CVB5_5Y1 |
| novel_circ_0015485 | - | ENSG00000246982;      | CVB5_5Y1 |
| novel_circ_0015488 | + | ENSG00000112078;      | CVB5_5Y1 |



|                    |   |                       |          |
|--------------------|---|-----------------------|----------|
| novel_circ_0015576 | - | ENSG00000001084;      | CVB5_5Y1 |
| novel_circ_0015606 | + | ENSG00000112208;      | CVB5_5Y1 |
| novel_circ_0015616 | + | ENSG00000145982;      | CVB5_5Y1 |
| novel_circ_0015655 | - | ENSG00000119899;      | CVB5_5Y1 |
| novel_circ_0015799 | - | ENSG00000132423;      | CVB5_5Y1 |
| novel_circ_0013979 | + | ENSG00000164236;      | CVB5_5Y1 |
| novel_circ_0014024 | + | ENSG00000047188;      | CVB5_5Y1 |
| novel_circ_0014152 | + | ENSG00000145833;      | CVB5_5Y1 |
| novel_circ_0014156 | + | ENSG00000145833;      | CVB5_5Y1 |
| novel_circ_0014158 | + | ENSG00000132570;      | CVB5_5Y1 |
| novel_circ_0014160 | + | ENSG00000132570;      | CVB5_5Y1 |
| novel_circ_0014423 | + | ENSG00000165671;      | CVB5_5Y1 |
| novel_circ_0014428 | + | ENSG00000197451;      | CVB5_5Y1 |
| novel_circ_0014566 | + | ENSG00000172262;      | CVB5_5Y1 |
| novel_circ_0014648 | + | ENSG00000086200;      | CVB5_5Y1 |
| novel_circ_0014847 | + | ENSG00000152348;      | CVB5_5Y1 |
| novel_circ_0014866 | + | ENSG00000071539;      | CVB5_5Y1 |
| novel_circ_0013082 | - | ENSG00000109323;      | CVB5_5Y1 |
| novel_circ_0013090 | - | ENSG00000164038;      | CVB5_5Y1 |
| novel_circ_0013343 | - | ENSG00000198589;      | CVB5_5Y1 |
| novel_circ_0013623 | - | ENSG00000109814;      | CVB5_5Y1 |
| novel_circ_0013785 | - | ENSG00000132463;      | CVB5_5Y1 |
| novel_circ_0013839 | - | ENSG00000196526;      | CVB5_5Y1 |
| novel_circ_0011825 | - | ENSG00000285943;ENSG0 | CVB5_5Y1 |
| novel_circ_0012126 | - | ENSG00000018408;      | CVB5_5Y1 |
| novel_circ_0012235 | + | ENSG00000008952;      | CVB5_5Y1 |
| novel_circ_0012276 | + | ENSG00000114346;      | CVB5_5Y1 |
| novel_circ_0012287 | + | ENSG00000177694;      | CVB5_5Y1 |
| novel_circ_0012288 | - | ENSG00000131374;      | CVB5_5Y1 |
| novel_circ_0012435 | + | ENSG00000242086;      | CVB5_5Y1 |
| novel_circ_0012520 | + | ENSG00000174738;      | CVB5_5Y1 |
| novel_circ_0012639 | + | ENSG00000170248;      | CVB5_5Y1 |
| novel_circ_0012980 | + | ENSG00000144741;      | CVB5_5Y1 |
| novel_circ_0013045 | + | ENSG00000080200;      | CVB5_5Y1 |
| novel_circ_0010239 | - | ENSG00000115866;      | CVB5_5Y1 |
| novel_circ_0010346 | + | ENSG00000136536;      | CVB5_5Y1 |
| novel_circ_0010578 | - | ENSG00000197121;      | CVB5_5Y1 |
| novel_circ_0010605 | - | ENSG00000013441;      | CVB5_5Y1 |
| novel_circ_0010765 | + | ENSG00000135924;      | CVB5_5Y1 |
| novel_circ_0010871 | + | ENSG00000173692;      | CVB5_5Y1 |
| novel_circ_0010873 | + | ENSG00000173692;      | CVB5_5Y1 |
| novel_circ_0010886 | + | ENSG00000144535;      | CVB5_5Y1 |
| novel_circ_0010938 | - | ENSG00000068024;      | CVB5_5Y1 |
| novel_circ_0011162 | + | ENSG00000234171;      | CVB5_5Y1 |
| novel_circ_0011210 | - | ENSG00000119787;      | CVB5_5Y1 |
| novel_circ_0011317 | - | ENSG00000068784;      | CVB5_5Y1 |
| novel_circ_0011376 | - | ENSG00000085760;      | CVB5_5Y1 |
| novel_circ_0011426 | - | ENSG00000115464;      | CVB5_5Y1 |
| novel_circ_0011440 | - | ENSG00000115464;      | CVB5_5Y1 |
| novel_circ_0011463 | - | ENSG00000082898;      | CVB5_5Y1 |
| novel_circ_0007204 | - | ENSG00000085491;      | CVB5_5Y1 |
| novel_circ_0007210 | + | ENSG00000116266;      | CVB5_5Y1 |
| novel_circ_0007327 | - | ENSG00000221978;      | CVB5_5Y1 |
| novel_circ_0007360 | + | ENSG00000163125;      | CVB5_5Y1 |
| novel_circ_0007463 | - | ENSG00000116580;      | CVB5_5Y1 |
| novel_circ_0007623 | - | ENSG00000179051;      | CVB5_5Y1 |
| novel_circ_0007735 | - | ENSG00000047410;      | CVB5_5Y1 |
| novel_circ_0007976 | + | ENSG00000067704;      | CVB5_5Y1 |

|                    |   |                       |                  |
|--------------------|---|-----------------------|------------------|
| novel_circ_0007980 | + | ENSG00000116141;      | CVB5_5Y1         |
| novel_circ_0008044 | + | ENSG00000185842;      | CVB5_5Y1         |
| novel_circ_0008085 | - | ENSG00000154370;      | CVB5_5Y1         |
| novel_circ_0008094 | - | ENSG00000069248;      | CVB5_5Y1         |
| novel_circ_0008161 | - | ENSG00000135749;      | CVB5_5Y1         |
| novel_circ_0008166 | + | ENSG00000143674;      | CVB5_5Y1         |
| novel_circ_0008192 | - | ENSG00000162885;      | CVB5_5Y1         |
| novel_circ_0008219 | - | ENSG00000091483;      | CVB5_5Y1         |
| novel_circ_0008465 | - | ENSG00000134697;      | CVB5_5Y1         |
| novel_circ_0008575 | - | ENSG00000159658;      | CVB5_5Y1         |
| novel_circ_0008730 | + | ENSG00000132849;      | CVB5_5Y1         |
| novel_circ_0008871 | + | ENSG00000116288;      | CVB5_5Y1         |
| novel_circ_0009037 | - | ENSG00000171603;      | CVB5_5Y1         |
| novel_circ_0017867 | + | ENSG00000157693;      | CVB5_5Y1         |
| novel_circ_0017928 | - | ENSG00000119522;      | CVB5_5Y1         |
| novel_circ_0018093 | - | ENSG00000127191;      | CVB5_5Y1         |
| novel_circ_0018148 | + | ENSG00000137145;      | CVB5_5Y1         |
| novel_circ_0018450 | + | ENSG00000135040;      | CVB5_5Y1         |
| novel_circ_0018528 | - | ENSG00000158169;      | CVB5_5Y1         |
| novel_circ_0018547 | + | ENSG00000285269;ENSG0 | CVB5_5Y1         |
| novel_circ_0018559 | + | ENSG00000130956;      | CVB5_5Y1         |
| novel_circ_0017042 | - | ENSG00000066827;      | CVB5_5Y1         |
| novel_circ_0017119 | - | ENSG00000169398;      | CVB5_5Y1         |
| novel_circ_0017279 | + | ENSG00000104660;      | CVB5_5Y1         |
| novel_circ_0017294 | + | ENSG00000104691;      | CVB5_5Y1         |
| novel_circ_0017504 | + | ENSG00000104218;      | CVB5_5Y1         |
| novel_circ_0017595 | - | ENSG00000176623;      | CVB5_5Y1         |
| novel_circ_0017619 | + | n/a                   | CVB5_5Y1         |
| novel_circ_0017646 | + | ENSG00000164953;      | CVB5_5Y1         |
| hsa_circ_0026285   | + | ENSG00000123268;      | CVB5_5Y1,Con_5Y1 |
| hsa_circ_0007689   | + | ENSG00000166224;      | CVB5_5Y1,Con_5Y1 |
| hsa_circ_0041411   | - | ENSG00000127804;      | CVB5_5Y1,Con_5Y1 |
| hsa_circ_0041694   | - | ENSG00000108559;      | CVB5_5Y1,Con_5Y1 |
| hsa_circ_0044709   | + | ENSG00000153933;      | CVB5_5Y1,Con_5Y1 |
| hsa_circ_0038696   | + | ENSG00000205629;      | CVB5_5Y1,Con_5Y1 |
| hsa_circ_0037561   | + | ENSG00000167978;      | CVB5_5Y1,Con_5Y1 |
| hsa_circ_0003564   | + | ENSG00000103351;      | CVB5_5Y1,Con_5Y1 |
| hsa_circ_0005559   | - | ENSG00000169410;      | CVB5_5Y1,Con_5Y1 |
| hsa_circ_0003512   | + | ENSG00000140153;      | CVB5_5Y1,Con_5Y1 |
| hsa_circ_0051428   | + | ENSG00000104856;      | CVB5_5Y1,Con_5Y1 |
| hsa_circ_0082304   | + | ENSG00000106459;      | CVB5_5Y1,Con_5Y1 |
| hsa_circ_0003649   | + | ENSG00000009335;      | CVB5_5Y1,Con_5Y1 |
| hsa_circ_0079607   | - | ENSG00000164548;      | CVB5_5Y1,Con_5Y1 |
| hsa_circ_0005004   | + | ENSG00000105953;      | CVB5_5Y1,Con_5Y1 |
| hsa_circ_0004826   | + | ENSG00000152818;      | CVB5_5Y1,Con_5Y1 |
| hsa_circ_0075504   | - | ENSG00000137266;      | CVB5_5Y1,Con_5Y1 |
| hsa_circ_0074736   | - | ENSG00000082516;      | CVB5_5Y1,Con_5Y1 |
| hsa_circ_0004473   | + | ENSG00000165671;      | CVB5_5Y1,Con_5Y1 |
| hsa_circ_0066814   | - | ENSG00000163611;ENSG0 | CVB5_5Y1,Con_5Y1 |
| hsa_circ_0064340   | + | ENSG00000154743;      | CVB5_5Y1,Con_5Y1 |
| hsa_circ_0057130   | - | ENSG00000138430;      | CVB5_5Y1,Con_5Y1 |
| hsa_circ_0054178   | - | ENSG00000115904;      | CVB5_5Y1,Con_5Y1 |
| hsa_circ_0015980   | + | ENSG00000077157;      | CVB5_5Y1,Con_5Y1 |
| hsa_circ_0088474   | - | ENSG00000119522;      | CVB5_5Y1,Con_5Y1 |
| hsa_circ_0002883   | - | ENSG00000136935;      | CVB5_5Y1,Con_5Y1 |
| hsa_circ_0089195   | + | ENSG00000130723;      | CVB5_5Y1,Con_5Y1 |
| hsa_circ_0089372   | + | ENSG00000160323;      | CVB5_5Y1,Con_5Y1 |
| hsa_circ_0084193   | + | ENSG00000164808;      | CVB5_5Y1,Con_5Y1 |

|                    |   |                       |                   |
|--------------------|---|-----------------------|-------------------|
| novel_circ_0002891 | + | ENSG00000032742;      | CVB5_5Y1,Con_5Y1  |
| novel_circ_0003213 | - | ENSG00000125257;      | CVB5_5Y1,Con_5Y1  |
| novel_circ_0002127 | + | ENSG00000130783;      | CVB5_5Y1,Con_5Y1  |
| novel_circ_0001342 | - | ENSG00000166016;      | CVB5_5Y1,Con_5Y1  |
| novel_circ_0001447 | - | ENSG00000030066;      | CVB5_5Y1,Con_5Y1  |
| novel_circ_0001537 | + | ENSG00000173715;      | CVB5_5Y1,Con_5Y1  |
| novel_circ_0000509 | - | ENSG00000165322;      | CVB5_5Y1,Con_5Y1  |
| novel_circ_0000514 | - | ENSG00000170759;      | CVB5_5Y1,Con_5Y1  |
| novel_circ_0000924 | - | ENSG00000138119;      | CVB5_5Y1,Con_5Y1  |
| novel_circ_0004737 | - | ENSG00000167969;      | CVB5_5Y1,Con_5Y1  |
| novel_circ_0006650 | + | ENSG00000065989;      | CVB5_5Y1,Con_5Y1  |
| novel_circ_0007024 | - | ENSG00000105355;      | CVB5_5Y1,Con_5Y1  |
| novel_circ_0009479 | + | ENSG00000101161;      | CVB5_5Y1,Con_5Y1  |
| novel_circ_0016651 | + | ENSG00000187257;      | CVB5_5Y1,Con_5Y1  |
| novel_circ_0013579 | + | n/a                   | CVB5_5Y1,Con_5Y1  |
| novel_circ_0012456 | - | ENSG00000163961;      | CVB5_5Y1,Con_5Y1  |
| novel_circ_0012714 | - | ENSG00000163814;      | CVB5_5Y1,Con_5Y1  |
| novel_circ_0010820 | - | ENSG00000152056;ENSG0 | CVB5_5Y1,Con_5Y1  |
| novel_circ_0011118 | + | ENSG00000115760;      | CVB5_5Y1,Con_5Y1  |
| novel_circ_0011258 | - | ENSG00000115970;      | CVB5_5Y1,Con_5Y1  |
| novel_circ_0011265 | + | ENSG00000152527;      | CVB5_5Y1,Con_5Y1  |
| novel_circ_0007287 | + | ENSG00000198162;      | CVB5_5Y1,Con_5Y1  |
| novel_circ_0008251 | - | ENSG00000153187;      | CVB5_5Y1,Con_5Y1  |
| novel_circ_0008795 | + | ENSG00000198160;      | CVB5_5Y1,Con_5Y1  |
| novel_circ_0017890 | + | ENSG00000136848;      | CVB5_5Y1,Con_5Y1  |
| novel_circ_0018139 | + | ENSG00000044459;      | CVB5_5Y1,Con_5Y1  |
| novel_circ_0018322 | + | ENSG00000137054;      | CVB5_5Y1,Con_5Y1  |
| novel_circ_0016858 | - | ENSG00000164933;ENSG0 | CVB5_5Y1,Con_5Y1  |
| novel_circ_0017307 | - | ENSG00000172728;      | CVB5_5Y1,Con_5Y1  |
| hsa_circ_0005534   | + | ENSG00000082805;      | CVB5_5Y1,Con_5Y1, |
| hsa_circ_0024251   | + | ENSG00000178105;      | CVB5_5Y1,Con_5Y1, |
| hsa_circ_0002778   | - | ENSG00000166788;      | CVB5_5Y1,Con_5Y1, |
| hsa_circ_0003970   | + | ENSG00000150760;      | CVB5_5Y1,Con_5Y1, |
| hsa_circ_0007503   | + | ENSG00000095787;      | CVB5_5Y1,Con_5Y1, |
| hsa_circ_0002637   | - | ENSG00000197879;      | CVB5_5Y1,Con_5Y1, |
| hsa_circ_0043898   | - | ENSG00000108799;      | CVB5_5Y1,Con_5Y1, |
| hsa_circ_0000786   | + | ENSG00000153933;      | CVB5_5Y1,Con_5Y1, |
| hsa_circ_0051401   | + | ENSG00000142273;      | CVB5_5Y1,Con_5Y1, |
| hsa_circ_0003912   | - | ENSG00000105516;      | CVB5_5Y1,Con_5Y1, |
| hsa_circ_0061776   | + | ENSG00000182240;      | CVB5_5Y1,Con_5Y1, |
| hsa_circ_0079431   | + | ENSG00000106443;      | CVB5_5Y1,Con_5Y1, |
| hsa_circ_0003027   | + | ENSG00000133612;      | CVB5_5Y1,Con_5Y1, |
| hsa_circ_0078373   | + | ENSG00000213079;      | CVB5_5Y1,Con_5Y1, |
| hsa_circ_0002906   | + | ENSG00000024048;      | CVB5_5Y1,Con_5Y1, |
| hsa_circ_0001610   | - | ENSG00000146072;      | CVB5_5Y1,Con_5Y1, |
| hsa_circ_0074104   | + | ENSG00000120733;      | CVB5_5Y1,Con_5Y1, |
| hsa_circ_0058988   | - | ENSG00000115687;      | CVB5_5Y1,Con_5Y1, |
| hsa_circ_0012344   | - | ENSG00000079277;      | CVB5_5Y1,Con_5Y1, |
| hsa_circ_0001856   | - | ENSG00000137075;      | CVB5_5Y1,Con_5Y1, |
| hsa_circ_0008842   | - | ENSG00000165244;      | CVB5_5Y1,Con_5Y1, |
| hsa_circ_0006863   | + | ENSG00000104671;      | CVB5_5Y1,Con_5Y1, |
| novel_circ_0002389 | + | ENSG00000120647;      | CVB5_5Y1,Con_5Y1, |
| novel_circ_0002599 | - | ENSG00000285238;ENSG0 | CVB5_5Y1,Con_5Y1, |
| novel_circ_0001135 | + | ENSG00000170242;      | CVB5_5Y1,Con_5Y1, |
| novel_circ_0000970 | - | ENSG00000052749;      | CVB5_5Y1,Con_5Y1, |
| novel_circ_0006907 | - | ENSG00000245680;      | CVB5_5Y1,Con_5Y1, |
| novel_circ_0011541 | - | ENSG00000273398;ENSG0 | CVB5_5Y1,Con_5Y1, |
| novel_circ_0007684 | + | ENSG00000162779;      | CVB5_5Y1,Con_5Y1, |

|                    |   |                       |                   |
|--------------------|---|-----------------------|-------------------|
| novel_circ_0018480 | - | ENSG00000169071;      | CVB5_5Y1,Con_5Y1, |
| novel_circ_0016855 | - | ENSG00000247081;      | CVB5_5Y1,Con_5Y1, |
| hsa_circ_0006128   | + | ENSG00000139154;      | CVB5_5Y1,Con_5Y1, |
| hsa_circ_0006599   | - | ENSG00000073614;      | CVB5_5Y1,Con_5Y1, |
| hsa_circ_0008802   | - | ENSG00000110911;      | CVB5_5Y1,Con_5Y1, |
| hsa_circ_0004282   | - | ENSG00000094916;      | CVB5_5Y1,Con_5Y1, |
| hsa_circ_0027261   | + | ENSG00000166986;      | CVB5_5Y1,Con_5Y1, |
| hsa_circ_0020203   | + | ENSG00000107651;      | CVB5_5Y1,Con_5Y1, |
| hsa_circ_0018054   | + | ENSG00000095787;      | CVB5_5Y1,Con_5Y1, |
| hsa_circ_0000706   | - | ENSG00000135720;      | CVB5_5Y1,Con_5Y1, |
| hsa_circ_0008926   | + | ENSG00000285920;ENSG0 | CVB5_5Y1,Con_5Y1, |
| hsa_circ_0003448   | + | ENSG00000258653;ENSG0 | CVB5_5Y1,Con_5Y1, |
| hsa_circ_0049613   | + | ENSG00000105613;      | CVB5_5Y1,Con_5Y1, |
| hsa_circ_0008174   | + | ENSG00000100393;      | CVB5_5Y1,Con_5Y1, |
| hsa_circ_0003359   | - | ENSG00000100425;      | CVB5_5Y1,Con_5Y1, |
| hsa_circ_0082633   | - | ENSG00000105939;      | CVB5_5Y1,Con_5Y1, |
| hsa_circ_0081258   | + | ENSG00000196367;      | CVB5_5Y1,Con_5Y1, |
| hsa_circ_0077084   | + | ENSG00000112701;      | CVB5_5Y1,Con_5Y1, |
| hsa_circ_0072264   | - | ENSG00000113569;      | CVB5_5Y1,Con_5Y1, |
| hsa_circ_0070959   | - | ENSG00000151466;      | CVB5_5Y1,Con_5Y1, |
| hsa_circ_0001356   | + | ENSG00000113810;      | CVB5_5Y1,Con_5Y1, |
| hsa_circ_0005093   | - | n/a                   | CVB5_5Y1,Con_5Y1, |
| hsa_circ_0065252   | - | ENSG00000173473;      | CVB5_5Y1,Con_5Y1, |
| hsa_circ_0066178   | - | ENSG00000163931;      | CVB5_5Y1,Con_5Y1, |
| hsa_circ_0058764   | + | ENSG00000077044;      | CVB5_5Y1,Con_5Y1, |
| hsa_circ_0004964   | + | ENSG00000176407;      | CVB5_5Y1,Con_5Y1, |
| hsa_circ_0008660   | + | ENSG00000120948;ENSG0 | CVB5_5Y1,Con_5Y1, |
| hsa_circ_0007167   | + | ENSG00000058668;      | CVB5_5Y1,Con_5Y1, |
| hsa_circ_0005886   | - | ENSG00000067208;      | CVB5_5Y1,Con_5Y1, |
| hsa_circ_0088095   | + | ENSG00000119471;      | CVB5_5Y1,Con_5Y1, |
| hsa_circ_0088425   | - | ENSG00000165209;      | CVB5_5Y1,Con_5Y1, |
| hsa_circ_0086536   | + | ENSG00000188352;      | CVB5_5Y1,Con_5Y1, |
| novel_circ_0006091 | + | ENSG00000087157;      | CVB5_5Y1,Con_5Y1, |
| novel_circ_0006150 | + | ENSG00000185298;      | CVB5_5Y1,Con_5Y1, |
| novel_circ_0004680 | - | ENSG00000063854;      | CVB5_5Y1,Con_5Y1, |
| novel_circ_0004840 | - | ENSG00000005339;      | CVB5_5Y1,Con_5Y1, |
| novel_circ_0005207 | + | ENSG00000170100;      | CVB5_5Y1,Con_5Y1, |
| novel_circ_0006764 | + | ENSG00000099308;      | CVB5_5Y1,Con_5Y1, |
| novel_circ_0006802 | + | ENSG00000160352;      | CVB5_5Y1,Con_5Y1, |
| novel_circ_0009930 | - | ENSG00000100271;      | CVB5_5Y1,Con_5Y1, |
| novel_circ_0014165 | - | ENSG00000113648;      | CVB5_5Y1,Con_5Y1, |
| novel_circ_0012739 | - | ENSG00000181555;      | CVB5_5Y1,Con_5Y1, |
| novel_circ_0010312 | - | ENSG00000226383;      | CVB5_5Y1,Con_5Y1, |
| novel_circ_0007747 | - | ENSG00000255275;ENSG0 | CVB5_5Y1,Con_5Y1, |
| novel_circ_0008765 | - | ENSG00000142856;      | CVB5_5Y1,Con_5Y1, |
| hsa_circ_0030408   | + | ENSG00000083535;      | CVB5_5Y1,Con_5Y1, |
| hsa_circ_0008940   | + | ENSG00000196935;      | CVB5_5Y1,Con_5Y1, |
| hsa_circ_0000298   | - | ENSG00000149182;      | CVB5_5Y1,Con_5Y1, |
| hsa_circ_0022025   | - | ENSG00000109919;      | CVB5_5Y1,Con_5Y1, |
| hsa_circ_0008856   | + | ENSG00000108219;      | CVB5_5Y1,Con_5Y1, |
| hsa_circ_0036158   | - | ENSG00000066933;      | CVB5_5Y1,Con_5Y1, |
| hsa_circ_0049457   | - | ENSG00000205517;      | CVB5_5Y1,Con_5Y1, |
| hsa_circ_0007749   | + | ENSG00000101773;      | CVB5_5Y1,Con_5Y1, |
| hsa_circ_0008212   | + | ENSG00000124226;      | CVB5_5Y1,Con_5Y1, |
| hsa_circ_0077083   | + | ENSG00000112701;      | CVB5_5Y1,Con_5Y1, |
| hsa_circ_0003506   | + | ENSG00000055163;      | CVB5_5Y1,Con_5Y1, |
| hsa_circ_0067620   | - | ENSG00000114127;      | CVB5_5Y1,Con_5Y1, |
| hsa_circ_0006905   | + | ENSG00000251503;      | CVB5_5Y1,Con_5Y1, |

|                    |   |                  |                   |
|--------------------|---|------------------|-------------------|
| hsa_circ_0002263   | + | ENSG00000104218; | CVB5_5Y1,Con_5Y1, |
| novel_circ_0002097 | - | ENSG00000130779; | CVB5_5Y1,Con_5Y1, |
| novel_circ_0000843 | + | ENSG00000107771; | CVB5_5Y1,Con_5Y1, |
| novel_circ_0009695 | + | ENSG00000099968; | CVB5_5Y1,Con_5Y1, |
| novel_circ_0009757 | + | ENSG00000100077; | CVB5_5Y1,Con_5Y1, |
| novel_circ_0013388 | + | ENSG00000109756; | CVB5_5Y1,Con_5Y1, |
| novel_circ_0013497 | - | ENSG00000083857; | CVB5_5Y1,Con_5Y1, |
| novel_circ_0018456 | - | ENSG00000135052; | CVB5_5Y1,Con_5Y1, |
| hsa_circ_0091427   | - | ENSG00000101882; | CVB5_5Y1,Con_5Y2  |
| hsa_circ_0008579   | + | ENSG00000198689; | CVB5_5Y1,Con_5Y2  |
| hsa_circ_0089772   | + | ENSG00000182378; | CVB5_5Y1,Con_5Y2  |
| hsa_circ_0000495   | - | ENSG00000005810; | CVB5_5Y1,Con_5Y2  |
| hsa_circ_0007885   | - | ENSG00000089234; | CVB5_5Y1,Con_5Y2  |
| hsa_circ_0025721   | + | ENSG00000029153; | CVB5_5Y1,Con_5Y2  |
| hsa_circ_0027629   | + | ENSG00000067798; | CVB5_5Y1,Con_5Y2  |
| hsa_circ_0022058   | - | ENSG00000030066; | CVB5_5Y1,Con_5Y2  |
| hsa_circ_0022983   | - | ENSG00000174669; | CVB5_5Y1,Con_5Y2  |
| hsa_circ_0003206   | + | ENSG00000166439; | CVB5_5Y1,Con_5Y2  |
| hsa_circ_0005321   | + | ENSG00000065613; | CVB5_5Y1,Con_5Y2  |
| hsa_circ_0002298   | + | ENSG00000107651; | CVB5_5Y1,Con_5Y2  |
| hsa_circ_0000236   | + | ENSG00000169826; | CVB5_5Y1,Con_5Y2  |
| hsa_circ_0018736   | - | ENSG00000138303; | CVB5_5Y1,Con_5Y2  |
| hsa_circ_0004954   | - | ENSG00000174238; | CVB5_5Y1,Con_5Y2  |
| hsa_circ_0042474   | - | ENSG00000124422; | CVB5_5Y1,Con_5Y2  |
| hsa_circ_0002404   | - | ENSG00000278540; | CVB5_5Y1,Con_5Y2  |
| hsa_circ_0043428   | - | ENSG00000125686; | CVB5_5Y1,Con_5Y2  |
| hsa_circ_0000679   | + | ENSG00000103222; | CVB5_5Y1,Con_5Y2  |
| hsa_circ_0002902   | - | ENSG00000168434; | CVB5_5Y1,Con_5Y2  |
| hsa_circ_0040792   | - | ENSG00000104731; | CVB5_5Y1,Con_5Y2  |
| hsa_circ_0035294   | + | ENSG00000138594; | CVB5_5Y1,Con_5Y2  |
| hsa_circ_0004047   | - | ENSG00000198604; | CVB5_5Y1,Con_5Y2  |
| hsa_circ_0002395   | - | ENSG00000182400; | CVB5_5Y1,Con_5Y2  |
| hsa_circ_0003819   | + | ENSG00000089916; | CVB5_5Y1,Con_5Y2  |
| hsa_circ_0006698   | + | ENSG00000007047; | CVB5_5Y1,Con_5Y2  |
| hsa_circ_0002560   | + | ENSG00000078142; | CVB5_5Y1,Con_5Y2  |
| hsa_circ_0062157   | - | ENSG00000069998; | CVB5_5Y1,Con_5Y2  |
| hsa_circ_0002035   | + | ENSG00000101294; | CVB5_5Y1,Con_5Y2  |
| hsa_circ_0060530   | + | ENSG00000101109; | CVB5_5Y1,Con_5Y2  |
| hsa_circ_0060922   | - | ENSG00000019186; | CVB5_5Y1,Con_5Y2  |
| hsa_circ_0002197   | - | ENSG00000159131; | CVB5_5Y1,Con_5Y2  |
| hsa_circ_0003476   | + | ENSG00000160218; | CVB5_5Y1,Con_5Y2  |
| hsa_circ_0007639   | + | ENSG00000146828; | CVB5_5Y1,Con_5Y2  |
| hsa_circ_0008441   | - | ENSG00000243797; | CVB5_5Y1,Con_5Y2  |
| hsa_circ_0082439   | + | ENSG00000131558; | CVB5_5Y1,Con_5Y2  |
| hsa_circ_0007762   | + | ENSG00000164506; | CVB5_5Y1,Con_5Y2  |
| hsa_circ_0003130   | - | ENSG00000184465; | CVB5_5Y1,Con_5Y2  |
| hsa_circ_0075487   | + | ENSG00000124588; | CVB5_5Y1,Con_5Y2  |
| hsa_circ_0005913   | + | ENSG00000137221; | CVB5_5Y1,Con_5Y2  |
| hsa_circ_0071261   | - | ENSG00000109686; | CVB5_5Y1,Con_5Y2  |
| hsa_circ_0003148   | - | ENSG00000189308; | CVB5_5Y1,Con_5Y2  |
| hsa_circ_0064388   | - | ENSG00000144711; | CVB5_5Y1,Con_5Y2  |
| hsa_circ_0002761   | - | ENSG00000073792; | CVB5_5Y1,Con_5Y2  |
| hsa_circ_0006039   | - | ENSG00000151276; | CVB5_5Y1,Con_5Y2  |
| hsa_circ_0002401   | + | ENSG00000158435; | CVB5_5Y1,Con_5Y2  |
| hsa_circ_0058874   | - | ENSG00000132323; | CVB5_5Y1,Con_5Y2  |
| hsa_circ_0058920   | - | ENSG00000130414; | CVB5_5Y1,Con_5Y2  |
| hsa_circ_0053786   | + | ENSG00000115760; | CVB5_5Y1,Con_5Y2  |
| hsa_circ_0015529   | - | ENSG00000135823; | CVB5_5Y1,Con_5Y2  |

|                    |   |                       |                   |
|--------------------|---|-----------------------|-------------------|
| hsa_circ_0000089   | + | ENSG00000065243;      | CVB5_5Y1,Con_5Y2  |
| hsa_circ_0087932   | - | ENSG00000106771;      | CVB5_5Y1,Con_5Y2  |
| hsa_circ_0088088   | + | ENSG00000119471;      | CVB5_5Y1,Con_5Y2  |
| hsa_circ_0005432   | + | ENSG00000187742;      | CVB5_5Y1,Con_5Y2  |
| hsa_circ_0085187   | - | ENSG00000104517;      | CVB5_5Y1,Con_5Y2  |
| hsa_circ_0002887   | + | ENSG00000078674;      | CVB5_5Y1,Con_5Y2  |
| hsa_circ_0005847   | + | ENSG00000254673;ENSG0 | CVB5_5Y1,Con_5Y2  |
| novel_circ_0018703 | + | ENSG00000156531;      | CVB5_5Y1,Con_5Y2  |
| novel_circ_0002925 | - | ENSG00000027001;      | CVB5_5Y1,Con_5Y2  |
| novel_circ_0003261 | - | ENSG00000088387;      | CVB5_5Y1,Con_5Y2  |
| novel_circ_0002485 | + | ENSG00000066084;      | CVB5_5Y1,Con_5Y2  |
| novel_circ_0001221 | - | ENSG00000080854;      | CVB5_5Y1,Con_5Y2  |
| novel_circ_0001549 | - | ENSG00000110066;      | CVB5_5Y1,Con_5Y2  |
| novel_circ_0001768 | + | ENSG00000284057;ENSG0 | CVB5_5Y1,Con_5Y2  |
| novel_circ_0005394 | - | ENSG00000007202;      | CVB5_5Y1,Con_5Y2  |
| novel_circ_0005482 | + | ENSG00000270647;      | CVB5_5Y1,Con_5Y2  |
| novel_circ_0005697 | + | ENSG00000108424;      | CVB5_5Y1,Con_5Y2  |
| novel_circ_0005806 | - | ENSG00000108395;      | CVB5_5Y1,Con_5Y2  |
| novel_circ_0005954 | - | ENSG00000108854;      | CVB5_5Y1,Con_5Y2  |
| novel_circ_0006018 | + | ENSG00000262943;      | CVB5_5Y1,Con_5Y2  |
| novel_circ_0005139 | - | ENSG00000140943;      | CVB5_5Y1,Con_5Y2  |
| novel_circ_0004137 | + | ENSG00000171763;      | CVB5_5Y1,Con_5Y2  |
| novel_circ_0004160 | + | ENSG00000138592;      | CVB5_5Y1,Con_5Y2  |
| novel_circ_0004402 | + | n/a                   | CVB5_5Y1,Con_5Y2  |
| novel_circ_0004413 | - | ENSG00000169375;      | CVB5_5Y1,Con_5Y2  |
| novel_circ_0006715 | + | ENSG00000132024;      | CVB5_5Y1,Con_5Y2  |
| novel_circ_0009709 | + | ENSG00000099917;      | CVB5_5Y1,Con_5Y2  |
| novel_circ_0009495 | + | ENSG00000155313;      | CVB5_5Y1,Con_5Y2  |
| novel_circ_0015822 | - | ENSG00000078319;      | CVB5_5Y1,Con_5Y2  |
| novel_circ_0016515 | - | ENSG00000272693;      | CVB5_5Y1,Con_5Y2  |
| novel_circ_0015112 | - | ENSG00000135541;      | CVB5_5Y1,Con_5Y2  |
| novel_circ_0015337 | + | ENSG00000130396;      | CVB5_5Y1,Con_5Y2  |
| novel_circ_0015540 | - | ENSG00000124571;      | CVB5_5Y1,Con_5Y2  |
| novel_circ_0011775 | - | ENSG00000138468;      | CVB5_5Y1,Con_5Y2  |
| novel_circ_0012222 | + | ENSG00000154814;      | CVB5_5Y1,Con_5Y2  |
| novel_circ_0012467 | - | ENSG00000163975;      | CVB5_5Y1,Con_5Y2  |
| novel_circ_0012653 | + | ENSG00000144674;      | CVB5_5Y1,Con_5Y2  |
| novel_circ_0007530 | - | ENSG00000248333;      | CVB5_5Y1,Con_5Y2  |
| novel_circ_0007953 | - | ENSG00000090686;      | CVB5_5Y1,Con_5Y2  |
| novel_circ_0008093 | - | ENSG00000069248;      | CVB5_5Y1,Con_5Y2  |
| novel_circ_0017500 | + | ENSG00000104218;      | CVB5_5Y1,Con_5Y2  |
| hsa_circ_0026154   | + | ENSG00000123352;      | CVB5_5Y1,Con_5Y2, |
| hsa_circ_0006286   | + | ENSG00000137693;      | CVB5_5Y1,Con_5Y2, |
| hsa_circ_0007626   | + | ENSG00000165476;      | CVB5_5Y1,Con_5Y2, |
| hsa_circ_0019122   | + | ENSG00000095564;      | CVB5_5Y1,Con_5Y2, |
| hsa_circ_0008605   | - | ENSG00000070366;      | CVB5_5Y1,Con_5Y2, |
| hsa_circ_0044776   | - | ENSG00000285897;ENSG0 | CVB5_5Y1,Con_5Y2, |
| hsa_circ_0045045   | - | ENSG00000108506;      | CVB5_5Y1,Con_5Y2, |
| hsa_circ_0008700   | + | ENSG00000141076;      | CVB5_5Y1,Con_5Y2, |
| hsa_circ_0002466   | - | ENSG00000128881;      | CVB5_5Y1,Con_5Y2, |
| hsa_circ_0000572   | - | ENSG00000088808;      | CVB5_5Y1,Con_5Y2, |
| hsa_circ_0032673   | - | ENSG00000119638;      | CVB5_5Y1,Con_5Y2, |
| hsa_circ_0008615   | - | ENSG00000104881;      | CVB5_5Y1,Con_5Y2, |
| hsa_circ_0048704   | + | ENSG00000127663;      | CVB5_5Y1,Con_5Y2, |
| hsa_circ_0003805   | - | ENSG00000153339;      | CVB5_5Y1,Con_5Y2, |
| hsa_circ_0062176   | - | ENSG00000243156;      | CVB5_5Y1,Con_5Y2, |
| hsa_circ_0001195   | - | ENSG00000185658;      | CVB5_5Y1,Con_5Y2, |
| hsa_circ_0005038   | - | ENSG00000124587;      | CVB5_5Y1,Con_5Y2, |

|                    |   |                       |                   |
|--------------------|---|-----------------------|-------------------|
| hsa_circ_0005888   | + | ENSG00000116731;      | CVB5_5Y1,Con_5Y2, |
| hsa_circ_0083455   | + | ENSG00000078674;      | CVB5_5Y1,Con_5Y2, |
| hsa_circ_0002537   | + | ENSG00000169139;      | CVB5_5Y1,Con_5Y2, |
| novel_circ_0018931 | + | ENSG00000146950;      | CVB5_5Y1,Con_5Y2, |
| novel_circ_0002211 | + | ENSG00000061936;      | CVB5_5Y1,Con_5Y2, |
| novel_circ_0005558 | - | ENSG00000131747;      | CVB5_5Y1,Con_5Y2, |
| novel_circ_0005801 | + | ENSG00000108384;      | CVB5_5Y1,Con_5Y2, |
| novel_circ_0004898 | - | ENSG00000102921;      | CVB5_5Y1,Con_5Y2, |
| novel_circ_0005020 | + | ENSG00000102908;      | CVB5_5Y1,Con_5Y2, |
| novel_circ_0006645 | - | ENSG00000130816;      | CVB5_5Y1,Con_5Y2, |
| novel_circ_0006733 | - | ENSG00000141867;      | CVB5_5Y1,Con_5Y2, |
| novel_circ_0013782 | + | ENSG00000132405;      | CVB5_5Y1,Con_5Y2, |
| novel_circ_0011950 | - | ENSG00000070476;      | CVB5_5Y1,Con_5Y2, |
| novel_circ_0012322 | + | ENSG00000274840;      | CVB5_5Y1,Con_5Y2, |
| novel_circ_0011634 | + | ENSG00000176407;      | CVB5_5Y1,Con_5Y2, |
| novel_circ_0007607 | - | ENSG00000224228;      | CVB5_5Y1,Con_5Y2, |
| novel_circ_0018233 | - | ENSG00000137073;      | CVB5_5Y1,Con_5Y2, |
| hsa_circ_0007100   | + | ENSG00000130826;      | CVB5_5Y1,Con_5Y3  |
| hsa_circ_0006390   | + | ENSG00000022840;      | CVB5_5Y1,Con_5Y3  |
| hsa_circ_0042330   | - | ENSG00000177302;      | CVB5_5Y1,Con_5Y3  |
| hsa_circ_0006690   | - | ENSG00000108588;      | CVB5_5Y1,Con_5Y3  |
| hsa_circ_0037753   | - | ENSG00000140632;      | CVB5_5Y1,Con_5Y3  |
| hsa_circ_0002604   | - | ENSG00000159593;      | CVB5_5Y1,Con_5Y3  |
| hsa_circ_0034088   | + | ENSG00000273749;      | CVB5_5Y1,Con_5Y3  |
| hsa_circ_0004180   | + | ENSG00000275835;      | CVB5_5Y1,Con_5Y3  |
| hsa_circ_0002551   | - | ENSG00000104064;      | CVB5_5Y1,Con_5Y3  |
| hsa_circ_0036927   | - | ENSG00000198901;ENSG0 | CVB5_5Y1,Con_5Y3  |
| hsa_circ_0048171   | - | ENSG00000099817;      | CVB5_5Y1,Con_5Y3  |
| hsa_circ_0062595   | + | ENSG00000099991;      | CVB5_5Y1,Con_5Y3  |
| hsa_circ_0006704   | - | ENSG00000089006;      | CVB5_5Y1,Con_5Y3  |
| hsa_circ_0007544   | - | ENSG00000146833;      | CVB5_5Y1,Con_5Y3  |
| hsa_circ_0002958   | + | ENSG00000145982;      | CVB5_5Y1,Con_5Y3  |
| hsa_circ_0008823   | - | ENSG00000122203;      | CVB5_5Y1,Con_5Y3  |
| hsa_circ_0073127   | - | ENSG00000152413;      | CVB5_5Y1,Con_5Y3  |
| hsa_circ_0006517   | + | ENSG00000145012;      | CVB5_5Y1,Con_5Y3  |
| hsa_circ_0054309   | - | ENSG00000115970;      | CVB5_5Y1,Con_5Y3  |
| hsa_circ_0009205   | - | ENSG00000188976;      | CVB5_5Y1,Con_5Y3  |
| hsa_circ_0086648   | + | ENSG00000086102;      | CVB5_5Y1,Con_5Y3  |
| hsa_circ_0005376   | + | ENSG00000168172;      | CVB5_5Y1,Con_5Y3  |
| novel_circ_0018752 | - | ENSG00000224533;ENSG0 | CVB5_5Y1,Con_5Y3  |
| novel_circ_0003192 | - | ENSG00000005810;      | CVB5_5Y1,Con_5Y3  |
| novel_circ_0002117 | + | ENSG00000184445;      | CVB5_5Y1,Con_5Y3  |
| novel_circ_0002251 | + | ENSG00000006831;      | CVB5_5Y1,Con_5Y3  |
| novel_circ_0001299 | + | ENSG00000169519;      | CVB5_5Y1,Con_5Y3  |
| novel_circ_0000942 | + | ENSG00000108239;      | CVB5_5Y1,Con_5Y3  |
| novel_circ_0004559 | + | ENSG00000173575;      | CVB5_5Y1,Con_5Y3  |
| novel_circ_0003345 | + | ENSG00000131323;      | CVB5_5Y1,Con_5Y3  |
| novel_circ_0009756 | + | ENSG00000100077;      | CVB5_5Y1,Con_5Y3  |
| novel_circ_0015079 | - | ENSG00000146376;      | CVB5_5Y1,Con_5Y3  |
| novel_circ_0012734 | - | ENSG00000181555;      | CVB5_5Y1,Con_5Y3  |
| novel_circ_0007777 | - | ENSG00000077549;      | CVB5_5Y1,Con_5Y3  |
| novel_circ_0017053 | - | ENSG00000167632;      | CVB5_5Y1,Con_5Y3  |
| novel_circ_0017330 | + | ENSG00000168615;      | CVB5_5Y1,Con_5Y3  |
| novel_circ_0017606 | - | n/a                   | CVB5_5Y1,Con_5Y3  |
| hsa_circ_0005990   | + | ENSG00000137693;      | CVB5_5Y1,CVB5_5Y  |
| hsa_circ_0045768   | - | ENSG00000167881;      | CVB5_5Y1,CVB5_5Y  |
| hsa_circ_0046509   | + | ENSG00000141556;      | CVB5_5Y1,CVB5_5Y  |
| hsa_circ_0008860   | + | ENSG00000138834;      | CVB5_5Y1,CVB5_5Y  |

|                    |   |                        |                   |
|--------------------|---|------------------------|-------------------|
| hsa_circ_0007593   | - | ENSG00000064607;       | CVB5_5Y1, CVB5_5Y |
| hsa_circ_0061721   | - | ENSG00000185658;       | CVB5_5Y1, CVB5_5Y |
| hsa_circ_0002708   | + | ENSG00000006451;       | CVB5_5Y1, CVB5_5Y |
| hsa_circ_0073036   | + | ENSG00000113161;       | CVB5_5Y1, CVB5_5Y |
| hsa_circ_0065242   | - | ENSG00000173473;       | CVB5_5Y1, CVB5_5Y |
| hsa_circ_0002377   | - | ENSG00000138399;       | CVB5_5Y1, CVB5_5Y |
| hsa_circ_0008141   | + | ENSG00000152061;       | CVB5_5Y1, CVB5_5Y |
| hsa_circ_0004406   | - | ENSG00000078369;       | CVB5_5Y1, CVB5_5Y |
| hsa_circ_0011191   | - | ENSG00000116353;       | CVB5_5Y1, CVB5_5Y |
| hsa_circ_0085257   | - | ENSG00000104517;       | CVB5_5Y1, CVB5_5Y |
| novel_circ_0000815 | - | ENSG00000151657;       | CVB5_5Y1, CVB5_5Y |
| novel_circ_0005293 | - | ENSG00000141027;       | CVB5_5Y1, CVB5_5Y |
| novel_circ_0005089 | - | ENSG00000090863;       | CVB5_5Y1, CVB5_5Y |
| novel_circ_0009767 | + | n/a                    | CVB5_5Y1, CVB5_5Y |
| novel_circ_0009478 | + | ENSG00000101161;       | CVB5_5Y1, CVB5_5Y |
| novel_circ_0016062 | - | ENSG00000006459;       | CVB5_5Y1, CVB5_5Y |
| novel_circ_0015680 | + | ENSG00000196586;       | CVB5_5Y1, CVB5_5Y |
| novel_circ_0014617 | + | ENSG00000095015;       | CVB5_5Y1, CVB5_5Y |
| novel_circ_0011829 | - | ENSG00000285943; ENSG0 | CVB5_5Y1, CVB5_5Y |
| novel_circ_0012163 | + | ENSG00000152601;       | CVB5_5Y1, CVB5_5Y |
| novel_circ_0012204 | + | ENSG00000174891;       | CVB5_5Y1, CVB5_5Y |
| novel_circ_0012947 | + | n/a                    | CVB5_5Y1, CVB5_5Y |
| novel_circ_0010356 | + | ENSG00000136560;       | CVB5_5Y1, CVB5_5Y |
| novel_circ_0010628 | + | ENSG00000055044;       | CVB5_5Y1, CVB5_5Y |
| novel_circ_0007237 | - | ENSG00000162777;       | CVB5_5Y1, CVB5_5Y |
| novel_circ_0007528 | + | ENSG00000157191;       | CVB5_5Y1, CVB5_5Y |
| novel_circ_0007722 | + | ENSG00000135829;       | CVB5_5Y1, CVB5_5Y |
| novel_circ_0008528 | - | ENSG00000198815;       | CVB5_5Y1, CVB5_5Y |
| hsa_circ_0001921   | - | ENSG00000072501;       | CVB5_5Y1, CVB5_5Y |
| hsa_circ_0002435   | - | ENSG00000107864;       | CVB5_5Y1, CVB5_5Y |
| hsa_circ_0007637   | - | ENSG00000005339;       | CVB5_5Y1, CVB5_5Y |
| hsa_circ_0006590   | + | ENSG00000099331;       | CVB5_5Y1, CVB5_5Y |
| hsa_circ_0048775   | - | ENSG00000196365;       | CVB5_5Y1, CVB5_5Y |
| hsa_circ_0060461   | + | ENSG00000101057;       | CVB5_5Y1, CVB5_5Y |
| hsa_circ_0004254   | - | ENSG00000124201;       | CVB5_5Y1, CVB5_5Y |
| hsa_circ_0004342   | + | ENSG00000130396;       | CVB5_5Y1, CVB5_5Y |
| hsa_circ_0075158   | + | ENSG00000165671;       | CVB5_5Y1, CVB5_5Y |
| hsa_circ_0002239   | + | ENSG00000116288;       | CVB5_5Y1, CVB5_5Y |
| novel_circ_0001424 | - | ENSG00000175216;       | CVB5_5Y1, CVB5_5Y |
| novel_circ_0006693 | - | ENSG00000196826;       | CVB5_5Y1, CVB5_5Y |
| novel_circ_0009529 | - | ENSG00000156299;       | CVB5_5Y1, CVB5_5Y |
| novel_circ_0011413 | + | ENSG00000173209;       | CVB5_5Y1, CVB5_5Y |
| novel_circ_0007548 | + | ENSG00000143190;       | CVB5_5Y1, CVB5_5Y |
| novel_circ_0008371 | - | ENSG00000134644;       | CVB5_5Y1, CVB5_5Y |
| novel_circ_0008997 | + | ENSG00000122483;       | CVB5_5Y1, CVB5_5Y |
| novel_circ_0017312 | - | ENSG00000104221;       | CVB5_5Y1, CVB5_5Y |
| novel_circ_0017604 | - | n/a                    | CVB5_5Y1, CVB5_5Y |
| hsa_circ_0005161   | + | ENSG00000150403;       | CVB5_5Y1, CVB5_5Y |
| hsa_circ_0022989   | + | ENSG00000254986;       | CVB5_5Y1, CVB5_5Y |
| hsa_circ_0019609   | - | ENSG00000198408;       | CVB5_5Y1, CVB5_5Y |
| hsa_circ_0006608   | + | ENSG00000067057;       | CVB5_5Y1, CVB5_5Y |
| hsa_circ_0008662   | - | ENSG00000148719;       | CVB5_5Y1, CVB5_5Y |
| hsa_circ_0044839   | + | ENSG00000108406;       | CVB5_5Y1, CVB5_5Y |
| hsa_circ_0007669   | + | ENSG00000103064;       | CVB5_5Y1, CVB5_5Y |
| hsa_circ_0003438   | - | ENSG00000090861;       | CVB5_5Y1, CVB5_5Y |
| hsa_circ_0006153   | - | ENSG00000185024;       | CVB5_5Y1, CVB5_5Y |
| hsa_circ_0031738   | - | ENSG00000182400;       | CVB5_5Y1, CVB5_5Y |
| hsa_circ_0031977   | - | ENSG00000100523;       | CVB5_5Y1, CVB5_5Y |



|                    |   |                  |                   |
|--------------------|---|------------------|-------------------|
| hsa_circ_0005746   | - | ENSG00000105063; | CVB5_5Y1, CVB5_5Y |
| hsa_circ_0003630   | - | ENSG00000184708; | CVB5_5Y1, CVB5_5Y |
| hsa_circ_0003342   | + | ENSG00000160218; | CVB5_5Y1, CVB5_5Y |
| hsa_circ_0079534   | - | ENSG00000183742; | CVB5_5Y1, CVB5_5Y |
| hsa_circ_0008336   | + | ENSG00000122507; | CVB5_5Y1, CVB5_5Y |
| hsa_circ_0004331   | + | ENSG00000127955; | CVB5_5Y1, CVB5_5Y |
| hsa_circ_0077492   | - | ENSG00000112249; | CVB5_5Y1, CVB5_5Y |
| hsa_circ_0076742   | - | ENSG00000112118; | CVB5_5Y1, CVB5_5Y |
| hsa_circ_0002594   | - | ENSG00000109381; | CVB5_5Y1, CVB5_5Y |
| hsa_circ_0001395   | + | ENSG00000109805; | CVB5_5Y1, CVB5_5Y |
| hsa_circ_0065052   | - | ENSG00000163812; | CVB5_5Y1, CVB5_5Y |
| hsa_circ_0008343   | + | ENSG00000177479; | CVB5_5Y1, CVB5_5Y |
| hsa_circ_0004001   | - | ENSG00000013441; | CVB5_5Y1, CVB5_5Y |
| hsa_circ_0053829   | + | ENSG00000115760; | CVB5_5Y1, CVB5_5Y |
| hsa_circ_0000025   | - | ENSG00000075151; | CVB5_5Y1, CVB5_5Y |
| hsa_circ_0011450   | + | ENSG00000116497; | CVB5_5Y1, CVB5_5Y |
| hsa_circ_0088602   | - | ENSG00000119487; | CVB5_5Y1, CVB5_5Y |
| hsa_circ_0008599   | - | ENSG00000171889; | CVB5_5Y1, CVB5_5Y |
| hsa_circ_0085800   | - | ENSG00000171045; | CVB5_5Y1, CVB5_5Y |
| novel_circ_0000877 | + | ENSG00000138182; | CVB5_5Y1, CVB5_5Y |
| novel_circ_0006745 | + | ENSG00000072954; | CVB5_5Y1, CVB5_5Y |
| novel_circ_0006821 | - | ENSG00000176619; | CVB5_5Y1, CVB5_5Y |
| novel_circ_0016434 | - | ENSG00000164744; | CVB5_5Y1, CVB5_5Y |
| novel_circ_0015463 | - | ENSG00000196821; | CVB5_5Y1, CVB5_5Y |
| novel_circ_0014442 | + | ENSG00000127022; | CVB5_5Y1, CVB5_5Y |
| novel_circ_0013552 | - | ENSG00000091490; | CVB5_5Y1, CVB5_5Y |
| novel_circ_0012592 | - | ENSG00000144635; | CVB5_5Y1, CVB5_5Y |
| novel_circ_0012969 | - | ENSG00000151276; | CVB5_5Y1, CVB5_5Y |
| novel_circ_0017241 | + | ENSG00000221914; | CVB5_5Y1, CVB5_5Y |
| hsa_circ_0004372   | + | ENSG00000152520; | CVB5_5Y1, CVB5_5Y |
| hsa_circ_0030253   | + | ENSG00000136169; | CVB5_5Y1, CVB5_5Y |
| hsa_circ_0027700   | - | ENSG00000049130; | CVB5_5Y1, CVB5_5Y |
| hsa_circ_0024231   | + | ENSG00000149311; | CVB5_5Y1, CVB5_5Y |
| hsa_circ_0004075   | - | ENSG00000109920; | CVB5_5Y1, CVB5_5Y |
| hsa_circ_0004162   | - | ENSG00000166889; | CVB5_5Y1, CVB5_5Y |
| hsa_circ_0024043   | - | ENSG00000020922; | CVB5_5Y1, CVB5_5Y |
| hsa_circ_0000258   | + | ENSG00000148843; | CVB5_5Y1, CVB5_5Y |
| hsa_circ_0008311   | + | ENSG00000136738; | CVB5_5Y1, CVB5_5Y |
| hsa_circ_0008655   | - | ENSG00000151240; | CVB5_5Y1, CVB5_5Y |
| hsa_circ_0041252   | - | ENSG00000174238; | CVB5_5Y1, CVB5_5Y |
| hsa_circ_0007736   | - | ENSG00000141252; | CVB5_5Y1, CVB5_5Y |
| hsa_circ_0008099   | - | ENSG00000108854; | CVB5_5Y1, CVB5_5Y |
| hsa_circ_0045526   | - | ENSG00000133195; | CVB5_5Y1, CVB5_5Y |
| hsa_circ_0006719   | - | ENSG00000255439; | CVB5_5Y1, CVB5_5Y |
| hsa_circ_0040188   | - | ENSG00000090861; | CVB5_5Y1, CVB5_5Y |
| hsa_circ_0031485   | - | ENSG00000092148; | CVB5_5Y1, CVB5_5Y |
| hsa_circ_0032406   | + | ENSG00000100731; | CVB5_5Y1, CVB5_5Y |
| hsa_circ_0008521   | + | ENSG00000080815; | CVB5_5Y1, CVB5_5Y |
| hsa_circ_0006446   | + | ENSG00000257103; | CVB5_5Y1, CVB5_5Y |
| hsa_circ_0000942   | + | ENSG00000125753; | CVB5_5Y1, CVB5_5Y |
| hsa_circ_0051749   | + | ENSG00000105464; | CVB5_5Y1, CVB5_5Y |
| hsa_circ_0006400   | - | ENSG00000141385; | CVB5_5Y1, CVB5_5Y |
| hsa_circ_0006209   | + | ENSG00000060069; | CVB5_5Y1, CVB5_5Y |
| hsa_circ_0004547   | + | ENSG00000183762; | CVB5_5Y1, CVB5_5Y |
| hsa_circ_0007513   | + | ENSG00000100116; | CVB5_5Y1, CVB5_5Y |
| hsa_circ_0008324   | - | ENSG00000106462; | CVB5_5Y1, CVB5_5Y |
| hsa_circ_0083196   | - | ENSG00000117868; | CVB5_5Y1, CVB5_5Y |
| hsa_circ_0081024   | - | ENSG00000127980; | CVB5_5Y1, CVB5_5Y |

|                    |   |                  |                   |
|--------------------|---|------------------|-------------------|
| hsa_circ_0078224   | - | ENSG00000131023; | CVB5_5Y1, CVB5_5Y |
| hsa_circ_0008403   | + | ENSG00000231185; | CVB5_5Y1, CVB5_5Y |
| hsa_circ_0004098   | - | ENSG00000072803; | CVB5_5Y1, CVB5_5Y |
| hsa_circ_0072380   | + | ENSG00000172262; | CVB5_5Y1, CVB5_5Y |
| hsa_circ_0072546   | + | ENSG00000062194; | CVB5_5Y1, CVB5_5Y |
| hsa_circ_0007692   | - | ENSG00000071127; | CVB5_5Y1, CVB5_5Y |
| hsa_circ_0003673   | - | ENSG00000145348; | CVB5_5Y1, CVB5_5Y |
| hsa_circ_0070421   | + | ENSG00000138646; | CVB5_5Y1, CVB5_5Y |
| hsa_circ_0003113   | - | ENSG00000163785; | CVB5_5Y1, CVB5_5Y |
| hsa_circ_0001349   | + | ENSG00000152601; | CVB5_5Y1, CVB5_5Y |
| hsa_circ_0001274   | + | ENSG00000154822; | CVB5_5Y1, CVB5_5Y |
| hsa_circ_0001965   | - | ENSG00000173889; | CVB5_5Y1, CVB5_5Y |
| hsa_circ_0002569   | - | ENSG00000181555; | CVB5_5Y1, CVB5_5Y |
| hsa_circ_0066452   | - | ENSG00000151276; | CVB5_5Y1, CVB5_5Y |
| hsa_circ_0003789   | + | ENSG00000211460; | CVB5_5Y1, CVB5_5Y |
| hsa_circ_0003994   | + | ENSG00000196141; | CVB5_5Y1, CVB5_5Y |
| hsa_circ_0007381   | - | ENSG00000153827; | CVB5_5Y1, CVB5_5Y |
| hsa_circ_0008944   | + | ENSG00000213064; | CVB5_5Y1, CVB5_5Y |
| hsa_circ_0000196   | - | ENSG00000135766; | CVB5_5Y1, CVB5_5Y |
| hsa_circ_0000042   | + | ENSG00000159023; | CVB5_5Y1, CVB5_5Y |
| hsa_circ_0000076   | + | ENSG00000172456; | CVB5_5Y1, CVB5_5Y |
| hsa_circ_0012782   | + | ENSG00000132849; | CVB5_5Y1, CVB5_5Y |
| hsa_circ_0009007   | + | ENSG00000136933; | CVB5_5Y1, CVB5_5Y |
| hsa_circ_0001897   | + | ENSG00000130714; | CVB5_5Y1, CVB5_5Y |
| hsa_circ_0006459   | - | ENSG00000156052; | CVB5_5Y1, CVB5_5Y |
| hsa_circ_0085434   | - | ENSG00000136986; | CVB5_5Y1, CVB5_5Y |
| hsa_circ_0085459   | - | ENSG00000156802; | CVB5_5Y1, CVB5_5Y |
| hsa_circ_0084746   | - | ENSG00000067167; | CVB5_5Y1, CVB5_5Y |
| novel_circ_0002930 | - | ENSG00000102699; | CVB5_5Y1, CVB5_5Y |
| novel_circ_0002780 | + | ENSG00000120802; | CVB5_5Y1, CVB5_5Y |
| novel_circ_0001460 | + | ENSG00000070047; | CVB5_5Y1, CVB5_5Y |
| novel_circ_0003948 | - | ENSG00000140470; | CVB5_5Y1, CVB5_5Y |
| novel_circ_0006830 | + | ENSG00000105176; | CVB5_5Y1, CVB5_5Y |
| novel_circ_0016381 | + | n/a              | CVB5_5Y1, CVB5_5Y |
| novel_circ_0016768 | + | ENSG00000164715; | CVB5_5Y1, CVB5_5Y |
| novel_circ_0015555 | + | ENSG00000198087; | CVB5_5Y1, CVB5_5Y |
| novel_circ_0012466 | - | ENSG00000163975; | CVB5_5Y1, CVB5_5Y |
| novel_circ_0008406 | - | ENSG00000134684; | CVB5_5Y1, CVB5_5Y |
| novel_circ_0018277 | - | ENSG00000080298; | CVB5_5Y1, CVB5_5Y |
| novel_circ_0017553 | - | ENSG00000147592; | CVB5_5Y1, CVB5_5Y |
| hsa_circ_0006903   | - | ENSG00000176915; | CVB5_5Y1, CVB5_5Y |
| hsa_circ_0044968   | + | ENSG00000170836; | CVB5_5Y1, CVB5_5Y |
| hsa_circ_0032047   | - | ENSG00000070367; | CVB5_5Y1, CVB5_5Y |
| hsa_circ_0003271   | + | ENSG00000167601; | CVB5_5Y1, CVB5_5Y |
| hsa_circ_0059802   | + | ENSG00000088305; | CVB5_5Y1, CVB5_5Y |
| hsa_circ_0010402   | - | ENSG00000077549; | CVB5_5Y1, CVB5_5Y |
| hsa_circ_0002318   | + | ENSG00000157693; | CVB5_5Y1, CVB5_5Y |
| novel_circ_0002602 | - | ENSG00000111653; | CVB5_5Y1, CVB5_5Y |
| novel_circ_0009269 | + | n/a              | CVB5_5Y1, CVB5_5Y |
| novel_circ_0015498 | + | ENSG00000156639; | CVB5_5Y1, CVB5_5Y |
| novel_circ_0011159 | - | ENSG00000171865; | CVB5_5Y1, CVB5_5Y |
| novel_circ_0011625 | - | ENSG00000159374; | CVB5_5Y1, CVB5_5Y |
| hsa_circ_0030051   | - | ENSG00000120690; | CVB5_5Y1, CVB5_5Y |
| hsa_circ_0007458   | + | ENSG00000158636; | CVB5_5Y1, CVB5_5Y |
| hsa_circ_0004376   | - | ENSG00000005100; | CVB5_5Y1, CVB5_5Y |
| hsa_circ_0007066   | - | ENSG00000215041; | CVB5_5Y1, CVB5_5Y |
| hsa_circ_0045758   | - | ENSG00000167880; | CVB5_5Y1, CVB5_5Y |
| hsa_circ_0046435   | + | ENSG00000141568; | CVB5_5Y1, CVB5_5Y |

|                    |   |                        |                   |
|--------------------|---|------------------------|-------------------|
| hsa_circ_0004315   | - | ENSG00000090863;       | CVB5_5Y1, CVB5_5Y |
| hsa_circ_0007206   | - | ENSG00000092439;       | CVB5_5Y1, CVB5_5Y |
| hsa_circ_0008636   | - | ENSG00000103591;       | CVB5_5Y1, CVB5_5Y |
| hsa_circ_0004794   | - | ENSG00000151748;       | CVB5_5Y1, CVB5_5Y |
| hsa_circ_0047292   | - | ENSG00000141447;       | CVB5_5Y1, CVB5_5Y |
| hsa_circ_0004812   | - | ENSG00000101004;       | CVB5_5Y1, CVB5_5Y |
| hsa_circ_0008540   | + | ENSG00000105819;       | CVB5_5Y1, CVB5_5Y |
| hsa_circ_0006920   | + | n/a                    | CVB5_5Y1, CVB5_5Y |
| hsa_circ_0073057   | - | ENSG00000152359;       | CVB5_5Y1, CVB5_5Y |
| hsa_circ_0065898   | - | ENSG00000145041;       | CVB5_5Y1, CVB5_5Y |
| hsa_circ_0064139   | + | ENSG00000168137;       | CVB5_5Y1, CVB5_5Y |
| hsa_circ_0003071   | + | ENSG00000196141;       | CVB5_5Y1, CVB5_5Y |
| hsa_circ_0012275   | - | ENSG00000197429;       | CVB5_5Y1, CVB5_5Y |
| hsa_circ_0006906   | - | ENSG00000116171; ENSG0 | CVB5_5Y1, CVB5_5Y |
| hsa_circ_0009143   | + | ENSG00000249859;       | CVB5_5Y1, CVB5_5Y |
| hsa_circ_0003134   | + | ENSG00000104213;       | CVB5_5Y1, CVB5_5Y |
| novel_circ_0018789 | + | ENSG00000130741;       | CVB5_5Y1, CVB5_5Y |
| novel_circ_0002612 | + | ENSG00000111581;       | CVB5_5Y1, CVB5_5Y |
| novel_circ_0001606 | - | ENSG00000162105;       | CVB5_5Y1, CVB5_5Y |
| novel_circ_0003881 | - | ENSG00000165929;       | CVB5_5Y1, CVB5_5Y |
| novel_circ_0014304 | - | ENSG00000153395;       | CVB5_5Y1, CVB5_5Y |
| novel_circ_0012628 | - | ENSG00000163539;       | CVB5_5Y1, CVB5_5Y |
| hsa_circ_0000345   | - | ENSG00000048649;       | CVB5_5Y1, CVB5_5Y |
| hsa_circ_0000345   | - | ENSG00000048649;       | CVB5_5Y1, CVB5_5Y |
| hsa_circ_0005637   | - | ENSG00000108854;       | CVB5_5Y1, CVB5_5Y |
| hsa_circ_0045534   | + | ENSG00000166685;       | CVB5_5Y1, CVB5_5Y |
| hsa_circ_0046447   | + | ENSG00000141556;       | CVB5_5Y1, CVB5_5Y |
| hsa_circ_0002255   | - | ENSG00000117899;       | CVB5_5Y1, CVB5_5Y |
| hsa_circ_0037002   | + | ENSG00000173575;       | CVB5_5Y1, CVB5_5Y |
| hsa_circ_0000926   | + | ENSG00000257103;       | CVB5_5Y1, CVB5_5Y |
| hsa_circ_0007940   | + | ENSG00000130429; ENSG0 | CVB5_5Y1, CVB5_5Y |
| hsa_circ_0003131   | - | ENSG00000112079;       | CVB5_5Y1, CVB5_5Y |
| hsa_circ_0008646   | + | ENSG00000038382;       | CVB5_5Y1, CVB5_5Y |
| hsa_circ_0007184   | + | ENSG00000138802;       | CVB5_5Y1, CVB5_5Y |
| hsa_circ_0067528   | - | ENSG00000051382;       | CVB5_5Y1, CVB5_5Y |
| hsa_circ_0007900   | - | ENSG00000135945;       | CVB5_5Y1, CVB5_5Y |
| hsa_circ_0004380   | - | ENSG00000167632;       | CVB5_5Y1, CVB5_5Y |
| hsa_circ_0005296   | + | ENSG00000168615;       | CVB5_5Y1, CVB5_5Y |
| novel_circ_0001051 | + | n/a                    | CVB5_5Y1, CVB5_5Y |
| novel_circ_0000729 | + | ENSG00000060339;       | CVB5_5Y1, CVB5_5Y |
| novel_circ_0005290 | - | ENSG00000141027;       | CVB5_5Y1, CVB5_5Y |
| novel_circ_0005790 | - | ENSG00000136450;       | CVB5_5Y1, CVB5_5Y |
| novel_circ_0006071 | - | ENSG00000129667;       | CVB5_5Y1, CVB5_5Y |
| novel_circ_0006122 | + | ENSG00000141564;       | CVB5_5Y1, CVB5_5Y |
| novel_circ_0004119 | + | ENSG00000137770;       | CVB5_5Y1, CVB5_5Y |
| novel_circ_0009925 | - | ENSG00000182841;       | CVB5_5Y1, CVB5_5Y |
| novel_circ_0013691 | - | ENSG00000145244;       | CVB5_5Y1, CVB5_5Y |
| novel_circ_0013923 | + | ENSG00000184305;       | CVB5_5Y1, CVB5_5Y |
| novel_circ_0018521 | + | ENSG00000148120;       | CVB5_5Y1, CVB5_5Y |
| novel_circ_0018543 | + | ENSG00000182150;       | CVB5_5Y1, CVB5_5Y |
| hsa_circ_0008131   | - | ENSG00000167393;       | CVB5_5Y1, CVB5_5Y |
| hsa_circ_0029170   | - | ENSG00000090975;       | CVB5_5Y1, CVB5_5Y |
| hsa_circ_0004596   | - | ENSG00000175582;       | CVB5_5Y1, CVB5_5Y |
| hsa_circ_0000228   | + | ENSG00000148516;       | CVB5_5Y1, CVB5_5Y |
| hsa_circ_0006285   | + | ENSG00000138160;       | CVB5_5Y1, CVB5_5Y |
| hsa_circ_0005508   | - | ENSG00000174238;       | CVB5_5Y1, CVB5_5Y |
| hsa_circ_0008866   | + | ENSG00000160551;       | CVB5_5Y1, CVB5_5Y |
| hsa_circ_0003127   | + | ENSG00000062716;       | CVB5_5Y1, CVB5_5Y |

|                    |   |                        |                   |
|--------------------|---|------------------------|-------------------|
| hsa_circ_0047096   | + | ENSG00000101752;       | CVB5_5Y1, CVB5_5Y |
| hsa_circ_0001581   | + | ENSG00000165097;       | CVB5_5Y1, CVB5_5Y |
| hsa_circ_0003373   | - | ENSG00000118816;       | CVB5_5Y1, CVB5_5Y |
| hsa_circ_0007841   | + | ENSG00000058262;       | CVB5_5Y1, CVB5_5Y |
| hsa_circ_0003693   | - | ENSG00000186141;       | CVB5_5Y1, CVB5_5Y |
| hsa_circ_0011163   | + | ENSG00000162419;       | CVB5_5Y1, CVB5_5Y |
| hsa_circ_0008129   | + | ENSG00000117054;       | CVB5_5Y1, CVB5_5Y |
| hsa_circ_0001807   | - | ENSG00000066777;       | CVB5_5Y1, CVB5_5Y |
| novel_circ_0013484 | + | ENSG00000109762;       | CVB5_5Y1, CVB5_5Y |
| novel_circ_0012830 | + | ENSG00000004534;       | CVB5_5Y1, CVB5_5Y |
| novel_circ_0012887 | - | ENSG00000163935;       | CVB5_5Y1, CVB5_5Y |
| novel_circ_0013057 | - | ENSG00000057019;       | CVB5_5Y1, CVB5_5Y |
| hsa_circ_0006238   | + | ENSG00000123352;       | CVB5_5Y1, CVB5_5Y |
| hsa_circ_0005589   | + | ENSG00000095139;       | CVB5_5Y1, CVB5_5Y |
| hsa_circ_0002124   | + | ENSG00000137804; ENSG0 | CVB5_5Y1, CVB5_5Y |
| hsa_circ_0000604   | - | ENSG00000137776;       | CVB5_5Y1, CVB5_5Y |
| hsa_circ_0036287   | + | ENSG00000179335;       | CVB5_5Y1, CVB5_5Y |
| hsa_circ_0072482   | + | ENSG00000039123;       | CVB5_5Y1, CVB5_5Y |
| hsa_circ_0066459   | - | ENSG00000151276;       | CVB5_5Y1, CVB5_5Y |
| hsa_circ_0058182   | + | ENSG00000079246;       | CVB5_5Y1, CVB5_5Y |
| hsa_circ_0010444   | - | ENSG00000127483;       | CVB5_5Y1, CVB5_5Y |
| hsa_circ_0008650   | - | ENSG00000185420;       | CVB5_5Y1, CVB5_5Y |
| hsa_circ_0004005   | - | ENSG00000162851;       | CVB5_5Y1, CVB5_5Y |
| hsa_circ_0005249   | + | ENSG00000165219;       | CVB5_5Y1, CVB5_5Y |
| hsa_circ_0086748   | - | ENSG00000186638;       | CVB5_5Y1, CVB5_5Y |
| novel_circ_0002030 | + | n/a                    | CVB5_5Y1, CVB5_5Y |
| novel_circ_0001329 | - | ENSG00000176102;       | CVB5_5Y1, CVB5_5Y |
| novel_circ_0000235 | - | ENSG00000066468;       | CVB5_5Y1, CVB5_5Y |
| novel_circ_0016657 | + | ENSG00000127955;       | CVB5_5Y1, CVB5_5Y |
| novel_circ_0017078 | - | ENSG00000169398;       | CVB5_5Y1, CVB5_5Y |
| hsa_circ_0028270   | - | ENSG00000204842;       | CVB5_5Y1, CVB5_5Y |
| hsa_circ_0005082   | - | ENSG00000196498;       | CVB5_5Y1, CVB5_5Y |
| hsa_circ_0005701   | + | ENSG00000110108;       | CVB5_5Y1, CVB5_5Y |
| hsa_circ_0002383   | - | ENSG00000214530;       | CVB5_5Y1, CVB5_5Y |
| hsa_circ_0019975   | + | ENSG00000065621;       | CVB5_5Y1, CVB5_5Y |
| hsa_circ_0040987   | + | ENSG00000158805;       | CVB5_5Y1, CVB5_5Y |
| hsa_circ_0007737   | + | ENSG00000126214; ENSG0 | CVB5_5Y1, CVB5_5Y |
| hsa_circ_0003312   | + | ENSG00000104856;       | CVB5_5Y1, CVB5_5Y |
| hsa_circ_0068843   | + | ENSG00000090316;       | CVB5_5Y1, CVB5_5Y |
| hsa_circ_0001846   | - | ENSG00000137073;       | CVB5_5Y1, CVB5_5Y |
| hsa_circ_0001866   | - | ENSG00000135018;       | CVB5_5Y1, CVB5_5Y |
| hsa_circ_0084051   | + | ENSG00000168615;       | CVB5_5Y1, CVB5_5Y |
| novel_circ_0004101 | - | ENSG00000067369;       | CVB5_5Y1, CVB5_5Y |
| novel_circ_0003834 | - | ENSG00000100629;       | CVB5_5Y1, CVB5_5Y |
| novel_circ_0006718 | + | ENSG00000104998;       | CVB5_5Y1, CVB5_5Y |
| novel_circ_0012267 | + | ENSG00000075420;       | CVB5_5Y1, CVB5_5Y |
| hsa_circ_0006541   | + | ENSG00000132964;       | CVB5_5Y1, CVB5_5Y |
| hsa_circ_0008670   | + | ENSG00000256950; ENSG0 | CVB5_5Y1, CVB5_5Y |
| hsa_circ_0029308   | - | ENSG00000196498;       | CVB5_5Y1, CVB5_5Y |
| hsa_circ_0000392   | - | ENSG00000015153;       | CVB5_5Y1, CVB5_5Y |
| hsa_circ_0006535   | + | ENSG00000066117;       | CVB5_5Y1, CVB5_5Y |
| hsa_circ_0008992   | - | ENSG00000149269;       | CVB5_5Y1, CVB5_5Y |
| hsa_circ_0020181   | - | ENSG00000151923;       | CVB5_5Y1, CVB5_5Y |
| hsa_circ_0004451   | + | ENSG00000019995;       | CVB5_5Y1, CVB5_5Y |
| hsa_circ_0003459   | - | ENSG00000122912;       | CVB5_5Y1, CVB5_5Y |
| hsa_circ_0003584   | + | ENSG00000095564;       | CVB5_5Y1, CVB5_5Y |
| hsa_circ_0042458   | - | ENSG00000124422;       | CVB5_5Y1, CVB5_5Y |
| hsa_circ_0041388   | - | ENSG00000070366;       | CVB5_5Y1, CVB5_5Y |

|                    |   |                        |                   |
|--------------------|---|------------------------|-------------------|
| hsa_circ_0038487   | + | ENSG00000103319;       | CVB5_5Y1, CVB5_5Y |
| hsa_circ_0006008   | + | ENSG00000090905;       | CVB5_5Y1, CVB5_5Y |
| hsa_circ_0008223   | - | ENSG00000169180;       | CVB5_5Y1, CVB5_5Y |
| hsa_circ_0039076   | + | ENSG00000080603;       | CVB5_5Y1, CVB5_5Y |
| hsa_circ_0006482   | + | ENSG00000067955;       | CVB5_5Y1, CVB5_5Y |
| hsa_circ_0007361   | - | ENSG00000140948;       | CVB5_5Y1, CVB5_5Y |
| hsa_circ_0037060   | - | ENSG00000140470;       | CVB5_5Y1, CVB5_5Y |
| hsa_circ_0008488   | + | ENSG00000156958;       | CVB5_5Y1, CVB5_5Y |
| hsa_circ_0004252   | + | ENSG00000137807;       | CVB5_5Y1, CVB5_5Y |
| hsa_circ_0004266   | + | ENSG00000137807;       | CVB5_5Y1, CVB5_5Y |
| hsa_circ_0036354   | - | ENSG00000169375;       | CVB5_5Y1, CVB5_5Y |
| hsa_circ_0036763   | + | ENSG00000185033;       | CVB5_5Y1, CVB5_5Y |
| hsa_circ_0000660   | + | ENSG00000140563;       | CVB5_5Y1, CVB5_5Y |
| hsa_circ_0000557   | - | ENSG00000119638;       | CVB5_5Y1, CVB5_5Y |
| hsa_circ_0049356   | + | ENSG00000142453;       | CVB5_5Y1, CVB5_5Y |
| hsa_circ_0050336   | + | ENSG00000105176;       | CVB5_5Y1, CVB5_5Y |
| hsa_circ_0003356   | + | ENSG00000011485;       | CVB5_5Y1, CVB5_5Y |
| hsa_circ_0005175   | - | ENSG00000100099;       | CVB5_5Y1, CVB5_5Y |
| hsa_circ_0001235   | - | ENSG00000100401;       | CVB5_5Y1, CVB5_5Y |
| hsa_circ_0004580   | - | ENSG00000089123;       | CVB5_5Y1, CVB5_5Y |
| hsa_circ_0009098   | + | ENSG00000088325;       | CVB5_5Y1, CVB5_5Y |
| hsa_circ_0002715   | + | ENSG00000160299;       | CVB5_5Y1, CVB5_5Y |
| hsa_circ_0007518   | + | ENSG00000090266;       | CVB5_5Y1, CVB5_5Y |
| hsa_circ_0003203   | - | ENSG00000126524;       | CVB5_5Y1, CVB5_5Y |
| hsa_circ_0005214   | - | ENSG00000135541;       | CVB5_5Y1, CVB5_5Y |
| hsa_circ_0006835   | - | ENSG00000135540;       | CVB5_5Y1, CVB5_5Y |
| hsa_circ_0076125   | + | ENSG00000023892;       | CVB5_5Y1, CVB5_5Y |
| hsa_circ_0001599   | - | ENSG00000096060;       | CVB5_5Y1, CVB5_5Y |
| hsa_circ_0077078   | + | ENSG00000112701;       | CVB5_5Y1, CVB5_5Y |
| hsa_circ_0075157   | + | ENSG00000165671;       | CVB5_5Y1, CVB5_5Y |
| hsa_circ_0073027   | - | ENSG00000198780;       | CVB5_5Y1, CVB5_5Y |
| hsa_circ_0006916   | - | ENSG00000152413;       | CVB5_5Y1, CVB5_5Y |
| hsa_circ_0073276   | + | ENSG00000113356;       | CVB5_5Y1, CVB5_5Y |
| hsa_circ_0009039   | - | ENSG00000083857;       | CVB5_5Y1, CVB5_5Y |
| hsa_circ_0002194   | - | ENSG00000181826;       | CVB5_5Y1, CVB5_5Y |
| hsa_circ_0006884   | + | ENSG00000113845;       | CVB5_5Y1, CVB5_5Y |
| hsa_circ_0006619   | + | ENSG00000075975;       | CVB5_5Y1, CVB5_5Y |
| hsa_circ_0005414   | + | ENSG00000153551;       | CVB5_5Y1, CVB5_5Y |
| hsa_circ_0001308   | - | ENSG00000114904;       | CVB5_5Y1, CVB5_5Y |
| hsa_circ_0008027   | + | ENSG00000114026;       | CVB5_5Y1, CVB5_5Y |
| hsa_circ_0066608   | + | ENSG00000064225;       | CVB5_5Y1, CVB5_5Y |
| hsa_circ_0004476   | - | ENSG00000143970;       | CVB5_5Y1, CVB5_5Y |
| hsa_circ_0007793   | + | ENSG00000162929;       | CVB5_5Y1, CVB5_5Y |
| hsa_circ_0015211   | + | ENSG00000117523;       | CVB5_5Y1, CVB5_5Y |
| hsa_circ_0015211   | + | ENSG00000117523;       | CVB5_5Y1, CVB5_5Y |
| hsa_circ_0003914   | - | ENSG00000143514;       | CVB5_5Y1, CVB5_5Y |
| hsa_circ_0017041   | - | ENSG00000054267; ENSG0 | CVB5_5Y1, CVB5_5Y |
| hsa_circ_0003757   | - | ENSG00000117305;       | CVB5_5Y1, CVB5_5Y |
| hsa_circ_0000073   | - | ENSG00000162600;       | CVB5_5Y1, CVB5_5Y |
| hsa_circ_0087960   | - | ENSG00000198121;       | CVB5_5Y1, CVB5_5Y |
| hsa_circ_0003496   | - | ENSG00000137073;       | CVB5_5Y1, CVB5_5Y |
| novel_circ_0018839 | + | n/a                    | CVB5_5Y1, CVB5_5Y |
| novel_circ_0002972 | - | ENSG00000120694;       | CVB5_5Y1, CVB5_5Y |
| novel_circ_0002192 | - | ENSG00000150990;       | CVB5_5Y1, CVB5_5Y |
| novel_circ_0002530 | - | ENSG00000139613;       | CVB5_5Y1, CVB5_5Y |
| novel_circ_0005542 | + | ENSG00000167258;       | CVB5_5Y1, CVB5_5Y |
| novel_circ_0005742 | - | ENSG00000011258;       | CVB5_5Y1, CVB5_5Y |
| novel_circ_0005181 | + | ENSG00000179588;       | CVB5_5Y1, CVB5_5Y |

|                    |   |                        |                   |
|--------------------|---|------------------------|-------------------|
| novel_circ_0006708 | - | ENSG00000179271;       | CVB5_5Y1, CVB5_5Y |
| novel_circ_0006835 | - | ENSG00000105556;       | CVB5_5Y1, CVB5_5Y |
| novel_circ_0006283 | - | ENSG00000177150;       | CVB5_5Y1, CVB5_5Y |
| novel_circ_0009814 | - | ENSG00000241878;       | CVB5_5Y1, CVB5_5Y |
| novel_circ_0009973 | - | ENSG00000075275;       | CVB5_5Y1, CVB5_5Y |
| novel_circ_0009271 | + | n/a                    | CVB5_5Y1, CVB5_5Y |
| novel_circ_0013250 | + | ENSG00000164134;       | CVB5_5Y1, CVB5_5Y |
| novel_circ_0012386 | + | ENSG00000163904;       | CVB5_5Y1, CVB5_5Y |
| novel_circ_0010546 | + | ENSG00000064933;       | CVB5_5Y1, CVB5_5Y |
| novel_circ_0018282 | + | ENSG00000198722;       | CVB5_5Y1, CVB5_5Y |
| novel_circ_0016990 | - | ENSG00000254166;       | CVB5_5Y1, CVB5_5Y |
| hsa_circ_0006020   | + | ENSG00000086712;       | CVB5_5Y1, CVB5_5Y |
| hsa_circ_0008077   | + | ENSG00000130962;       | CVB5_5Y1, CVB5_5Y |
| hsa_circ_0007290   | - | ENSG00000069509;       | CVB5_5Y1, CVB5_5Y |
| hsa_circ_0007817   | - | ENSG00000086758;       | CVB5_5Y1, CVB5_5Y |
| hsa_circ_0091178   | - | ENSG00000165288;       | CVB5_5Y1, CVB5_5Y |
| hsa_circ_0029614   | - | ENSG00000121390;       | CVB5_5Y1, CVB5_5Y |
| hsa_circ_0003285   | - | ENSG00000150456;       | CVB5_5Y1, CVB5_5Y |
| hsa_circ_0003489   | + | ENSG00000132964;       | CVB5_5Y1, CVB5_5Y |
| hsa_circ_0006597   | + | ENSG00000152520;       | CVB5_5Y1, CVB5_5Y |
| hsa_circ_0030720   | + | ENSG00000134882;       | CVB5_5Y1, CVB5_5Y |
| hsa_circ_0002601   | - | ENSG00000204842;       | CVB5_5Y1, CVB5_5Y |
| hsa_circ_0028601   | + | ENSG00000135119;       | CVB5_5Y1, CVB5_5Y |
| hsa_circ_0028899   | + | ENSG00000022840;       | CVB5_5Y1, CVB5_5Y |
| hsa_circ_0000450   | - | ENSG00000139725;       | CVB5_5Y1, CVB5_5Y |
| hsa_circ_0007708   | + | ENSG00000130783;       | CVB5_5Y1, CVB5_5Y |
| hsa_circ_0007552   | - | ENSG00000188026;       | CVB5_5Y1, CVB5_5Y |
| hsa_circ_0000458   | + | ENSG00000086598;       | CVB5_5Y1, CVB5_5Y |
| hsa_circ_0000462   | - | ENSG00000139370;       | CVB5_5Y1, CVB5_5Y |
| hsa_circ_0004602   | - | ENSG00000139636;       | CVB5_5Y1, CVB5_5Y |
| hsa_circ_0026230   | + | ENSG00000161813;       | CVB5_5Y1, CVB5_5Y |
| hsa_circ_0000408   | - | ENSG00000111602;       | CVB5_5Y1, CVB5_5Y |
| hsa_circ_0007845   | - | ENSG00000089693;       | CVB5_5Y1, CVB5_5Y |
| hsa_circ_0027492   | + | ENSG00000135679;       | CVB5_5Y1, CVB5_5Y |
| hsa_circ_0027699   | - | ENSG00000049130;       | CVB5_5Y1, CVB5_5Y |
| hsa_circ_0006868   | - | ENSG00000152404;       | CVB5_5Y1, CVB5_5Y |
| hsa_circ_0024169   | + | ENSG00000166266;       | CVB5_5Y1, CVB5_5Y |
| hsa_circ_0004962   | + | ENSG00000168092;       | CVB5_5Y1, CVB5_5Y |
| hsa_circ_0020976   | - | ENSG00000167355;       | CVB5_5Y1, CVB5_5Y |
| hsa_circ_0008338   | + | ENSG00000149054;       | CVB5_5Y1, CVB5_5Y |
| hsa_circ_0006705   | + | ENSG00000166439;       | CVB5_5Y1, CVB5_5Y |
| hsa_circ_0000343   | - | ENSG00000074201;       | CVB5_5Y1, CVB5_5Y |
| hsa_circ_0023942   | - | ENSG00000073921;       | CVB5_5Y1, CVB5_5Y |
| hsa_circ_0024037   | - | ENSG00000020922;       | CVB5_5Y1, CVB5_5Y |
| hsa_circ_0024067   | + | ENSG00000166037;       | CVB5_5Y1, CVB5_5Y |
| hsa_circ_0000255   | - | ENSG00000107829;       | CVB5_5Y1, CVB5_5Y |
| hsa_circ_0000257   | + | ENSG00000166197;       | CVB5_5Y1, CVB5_5Y |
| hsa_circ_0003366   | + | ENSG00000148843;       | CVB5_5Y1, CVB5_5Y |
| hsa_circ_0000259   | + | ENSG00000065613;       | CVB5_5Y1, CVB5_5Y |
| hsa_circ_0002533   | + | ENSG00000151532;       | CVB5_5Y1, CVB5_5Y |
| hsa_circ_0020050   | + | ENSG00000148737;       | CVB5_5Y1, CVB5_5Y |
| hsa_circ_0020072   | - | ENSG00000099204;       | CVB5_5Y1, CVB5_5Y |
| hsa_circ_0020134   | - | ENSG00000151893;       | CVB5_5Y1, CVB5_5Y |
| hsa_circ_0004498   | - | ENSG00000151923;       | CVB5_5Y1, CVB5_5Y |
| hsa_circ_0007448   | - | ENSG00000151461;       | CVB5_5Y1, CVB5_5Y |
| hsa_circ_0020238   | - | ENSG00000066468;       | CVB5_5Y1, CVB5_5Y |
| hsa_circ_0005734   | - | ENSG00000258539; ENSG0 | CVB5_5Y1, CVB5_5Y |
| hsa_circ_0008969   | - | ENSG00000203791; ENSG0 | CVB5_5Y1, CVB5_5Y |

|                  |   |                  |                   |
|------------------|---|------------------|-------------------|
| hsa_circ_0004477 | + | ENSG00000065328; | CVB5_5Y1, CVB5_5Y |
| hsa_circ_0002618 | - | ENSG00000136770; | CVB5_5Y1, CVB5_5Y |
| hsa_circ_0004306 | - | ENSG00000136770; | CVB5_5Y1, CVB5_5Y |
| hsa_circ_0003583 | - | ENSG00000150867; | CVB5_5Y1, CVB5_5Y |
| hsa_circ_0018009 | - | ENSG00000107890; | CVB5_5Y1, CVB5_5Y |
| hsa_circ_0018168 | - | ENSG00000148498; | CVB5_5Y1, CVB5_5Y |
| hsa_circ_0006272 | + | ENSG00000060339; | CVB5_5Y1, CVB5_5Y |
| hsa_circ_0008865 | + | ENSG00000165732; | CVB5_5Y1, CVB5_5Y |
| hsa_circ_0017412 | - | ENSG00000107929; | CVB5_5Y1, CVB5_5Y |
| hsa_circ_0019079 | + | ENSG00000138182; | CVB5_5Y1, CVB5_5Y |
| hsa_circ_0005801 | - | ENSG00000077147; | CVB5_5Y1, CVB5_5Y |
| hsa_circ_0005887 | - | ENSG00000171311; | CVB5_5Y1, CVB5_5Y |
| hsa_circ_0008996 | + | ENSG00000065559; | CVB5_5Y1, CVB5_5Y |
| hsa_circ_0004142 | + | ENSG00000091542; | CVB5_5Y1, CVB5_5Y |
| hsa_circ_0005946 | + | ENSG00000132383; | CVB5_5Y1, CVB5_5Y |
| hsa_circ_0002167 | + | ENSG00000108587; | CVB5_5Y1, CVB5_5Y |
| hsa_circ_0004751 | + | ENSG00000275700; | CVB5_5Y1, CVB5_5Y |
| hsa_circ_0000759 | - | ENSG00000278540; | CVB5_5Y1, CVB5_5Y |
| hsa_circ_0007635 | + | ENSG00000131467; | CVB5_5Y1, CVB5_5Y |
| hsa_circ_0004622 | + | ENSG00000141279; | CVB5_5Y1, CVB5_5Y |
| hsa_circ_0005600 | + | ENSG00000175155; | CVB5_5Y1, CVB5_5Y |
| hsa_circ_0004958 | + | ENSG00000170836; | CVB5_5Y1, CVB5_5Y |
| hsa_circ_0007682 | + | ENSG00000141376; | CVB5_5Y1, CVB5_5Y |
| hsa_circ_0004913 | - | ENSG00000136478; | CVB5_5Y1, CVB5_5Y |
| hsa_circ_0005347 | + | ENSG00000171634; | CVB5_5Y1, CVB5_5Y |
| hsa_circ_0000741 | + | ENSG00000181222; | CVB5_5Y1, CVB5_5Y |
| hsa_circ_0003684 | - | ENSG00000125447; | CVB5_5Y1, CVB5_5Y |
| hsa_circ_0006799 | - | ENSG00000129646; | CVB5_5Y1, CVB5_5Y |
| hsa_circ_0008114 | + | ENSG00000167280; | CVB5_5Y1, CVB5_5Y |
| hsa_circ_0041986 | + | ENSG00000170037; | CVB5_5Y1, CVB5_5Y |
| hsa_circ_0008310 | + | ENSG00000170037; | CVB5_5Y1, CVB5_5Y |
| hsa_circ_0000813 | + | ENSG00000141564; | CVB5_5Y1, CVB5_5Y |
| hsa_circ_0046123 | - | ENSG00000157637; | CVB5_5Y1, CVB5_5Y |
| hsa_circ_0046209 | - | ENSG00000182446; | CVB5_5Y1, CVB5_5Y |
| hsa_circ_0000673 | - | ENSG00000171490; | CVB5_5Y1, CVB5_5Y |
| hsa_circ_0008120 | + | ENSG00000103222; | CVB5_5Y1, CVB5_5Y |
| hsa_circ_0000688 | + | ENSG00000013364; | CVB5_5Y1, CVB5_5Y |
| hsa_circ_0008535 | - | ENSG00000174938; | CVB5_5Y1, CVB5_5Y |
| hsa_circ_0037158 | - | ENSG00000103126; | CVB5_5Y1, CVB5_5Y |
| hsa_circ_0007788 | - | ENSG00000153406; | CVB5_5Y1, CVB5_5Y |
| hsa_circ_0005813 | + | ENSG00000102910; | CVB5_5Y1, CVB5_5Y |
| hsa_circ_0000705 | - | ENSG00000125107; | CVB5_5Y1, CVB5_5Y |
| hsa_circ_0002122 | + | ENSG00000102974; | CVB5_5Y1, CVB5_5Y |
| hsa_circ_0006845 | + | ENSG00000102908; | CVB5_5Y1, CVB5_5Y |
| hsa_circ_0004983 | - | ENSG00000181019; | CVB5_5Y1, CVB5_5Y |
| hsa_circ_0009163 | + | ENSG00000189091; | CVB5_5Y1, CVB5_5Y |
| hsa_circ_0006173 | + | n/a              | CVB5_5Y1, CVB5_5Y |
| hsa_circ_0003315 | - | ENSG00000090863; | CVB5_5Y1, CVB5_5Y |
| hsa_circ_0004910 | - | ENSG00000103091; | CVB5_5Y1, CVB5_5Y |
| hsa_circ_0000669 | - | ENSG00000153048; | CVB5_5Y1, CVB5_5Y |
| hsa_circ_0004640 | + | ENSG00000158545; | CVB5_5Y1, CVB5_5Y |
| hsa_circ_0040831 | + | ENSG00000158545; | CVB5_5Y1, CVB5_5Y |
| hsa_circ_0005152 | - | ENSG00000187555; | CVB5_5Y1, CVB5_5Y |
| hsa_circ_0004344 | - | ENSG00000187555; | CVB5_5Y1, CVB5_5Y |
| hsa_circ_0003846 | - | ENSG00000167522; | CVB5_5Y1, CVB5_5Y |
| hsa_circ_0040929 | - | ENSG00000167522; | CVB5_5Y1, CVB5_5Y |
| hsa_circ_0004945 | + | ENSG00000197912; | CVB5_5Y1, CVB5_5Y |
| hsa_circ_0037096 | - | ENSG00000140479; | CVB5_5Y1, CVB5_5Y |

|                  |   |                        |                   |
|------------------|---|------------------------|-------------------|
| hsa_circ_0034294 | - | ENSG00000104067;       | CVB5_5Y1, CVB5_5Y |
| hsa_circ_0004942 | - | ENSG00000137824;       | CVB5_5Y1, CVB5_5Y |
| hsa_circ_0004279 | - | ENSG00000128908;       | CVB5_5Y1, CVB5_5Y |
| hsa_circ_0008346 | + | ENSG00000285920; ENSG0 | CVB5_5Y1, CVB5_5Y |
| hsa_circ_0000596 | + | ENSG00000166734;       | CVB5_5Y1, CVB5_5Y |
| hsa_circ_0035292 | + | ENSG00000138594;       | CVB5_5Y1, CVB5_5Y |
| hsa_circ_0003713 | - | ENSG00000137776;       | CVB5_5Y1, CVB5_5Y |
| hsa_circ_0008104 | + | ENSG00000140455;       | CVB5_5Y1, CVB5_5Y |
| hsa_circ_0000612 | + | ENSG00000140455;       | CVB5_5Y1, CVB5_5Y |
| hsa_circ_0035796 | - | ENSG00000103657;       | CVB5_5Y1, CVB5_5Y |
| hsa_circ_0004374 | - | ENSG00000166855;       | CVB5_5Y1, CVB5_5Y |
| hsa_circ_0004401 | - | ENSG00000179151;       | CVB5_5Y1, CVB5_5Y |
| hsa_circ_0003620 | - | ENSG00000140374;       | CVB5_5Y1, CVB5_5Y |
| hsa_circ_0005558 | - | ENSG00000117899;       | CVB5_5Y1, CVB5_5Y |
| hsa_circ_0036599 | - | ENSG00000140612;       | CVB5_5Y1, CVB5_5Y |
| hsa_circ_0007262 | + | ENSG00000173575; ENSG0 | CVB5_5Y1, CVB5_5Y |
| hsa_circ_0000655 | + | ENSG00000173575;       | CVB5_5Y1, CVB5_5Y |
| hsa_circ_0036997 | + | ENSG00000173575;       | CVB5_5Y1, CVB5_5Y |
| hsa_circ_0037000 | + | ENSG00000173575;       | CVB5_5Y1, CVB5_5Y |
| hsa_circ_0006809 | - | ENSG00000198752;       | CVB5_5Y1, CVB5_5Y |
| hsa_circ_0005721 | - | ENSG00000129566;       | CVB5_5Y1, CVB5_5Y |
| hsa_circ_0031241 | - | ENSG00000100461;       | CVB5_5Y1, CVB5_5Y |
| hsa_circ_0000524 | - | ENSG00000100461;       | CVB5_5Y1, CVB5_5Y |
| hsa_circ_0031447 | - | ENSG00000196792;       | CVB5_5Y1, CVB5_5Y |
| hsa_circ_0000530 | + | ENSG00000150527;       | CVB5_5Y1, CVB5_5Y |
| hsa_circ_0000539 | - | ENSG00000126787;       | CVB5_5Y1, CVB5_5Y |
| hsa_circ_0032825 | - | ENSG00000100629;       | CVB5_5Y1, CVB5_5Y |
| hsa_circ_0007715 | + | ENSG00000099622;       | CVB5_5Y1, CVB5_5Y |
| hsa_circ_0000915 | - | ENSG00000105701;       | CVB5_5Y1, CVB5_5Y |
| hsa_circ_0006804 | + | ENSG00000167491;       | CVB5_5Y1, CVB5_5Y |
| hsa_circ_0007328 | + | ENSG00000104885;       | CVB5_5Y1, CVB5_5Y |
| hsa_circ_0000921 | + | ENSG00000105176;       | CVB5_5Y1, CVB5_5Y |
| hsa_circ_0002661 | - | ENSG00000105298;       | CVB5_5Y1, CVB5_5Y |
| hsa_circ_0000871 | - | ENSG00000186111;       | CVB5_5Y1, CVB5_5Y |
| hsa_circ_0006670 | + | ENSG00000105738;       | CVB5_5Y1, CVB5_5Y |
| hsa_circ_0000936 | + | ENSG00000160410;       | CVB5_5Y1, CVB5_5Y |
| hsa_circ_0000944 | + | ENSG00000105321;       | CVB5_5Y1, CVB5_5Y |
| hsa_circ_0002084 | + | ENSG00000104805;       | CVB5_5Y1, CVB5_5Y |
| hsa_circ_0052095 | + | ENSG00000196214;       | CVB5_5Y1, CVB5_5Y |
| hsa_circ_0000880 | - | ENSG00000130254;       | CVB5_5Y1, CVB5_5Y |
| hsa_circ_0005104 | + | ENSG00000160633;       | CVB5_5Y1, CVB5_5Y |
| hsa_circ_0006382 | + | ENSG00000099783;       | CVB5_5Y1, CVB5_5Y |
| hsa_circ_0046702 | - | ENSG00000176105;       | CVB5_5Y1, CVB5_5Y |
| hsa_circ_0008435 | + | ENSG00000060069;       | CVB5_5Y1, CVB5_5Y |
| hsa_circ_0005353 | + | ENSG00000206418;       | CVB5_5Y1, CVB5_5Y |
| hsa_circ_0008870 | - | ENSG00000100030;       | CVB5_5Y1, CVB5_5Y |
| hsa_circ_0007312 | + | ENSG00000100014; ENSG0 | CVB5_5Y1, CVB5_5Y |
| hsa_circ_0002931 | - | ENSG00000183765;       | CVB5_5Y1, CVB5_5Y |
| hsa_circ_0006752 | + | ENSG00000186575;       | CVB5_5Y1, CVB5_5Y |
| hsa_circ_0063534 | - | ENSG00000100401;       | CVB5_5Y1, CVB5_5Y |
| hsa_circ_0063716 | + | ENSG00000241484; ENSG0 | CVB5_5Y1, CVB5_5Y |
| hsa_circ_0006117 | + | ENSG00000132670;       | CVB5_5Y1, CVB5_5Y |
| hsa_circ_0001137 | + | ENSG00000088305;       | CVB5_5Y1, CVB5_5Y |
| hsa_circ_0008817 | - | ENSG00000131051;       | CVB5_5Y1, CVB5_5Y |
| hsa_circ_0060420 | - | ENSG00000124177;       | CVB5_5Y1, CVB5_5Y |
| hsa_circ_0008253 | - | ENSG00000054793;       | CVB5_5Y1, CVB5_5Y |
| hsa_circ_0060927 | - | ENSG00000019186;       | CVB5_5Y1, CVB5_5Y |
| hsa_circ_0061342 | - | ENSG00000142192;       | CVB5_5Y1, CVB5_5Y |



|                  |   |                  |                  |
|------------------|---|------------------|------------------|
| hsa_circ_0001187 | + | ENSG00000142197; | CVB5_5Y1,CVB5_5Y |
| hsa_circ_0061774 | + | ENSG00000182240; | CVB5_5Y1,CVB5_5Y |
| hsa_circ_0001200 | - | ENSG00000183255; | CVB5_5Y1,CVB5_5Y |
| hsa_circ_0005037 | + | ENSG00000197381; | CVB5_5Y1,CVB5_5Y |
| hsa_circ_0002903 | + | ENSG00000160299; | CVB5_5Y1,CVB5_5Y |
| hsa_circ_0005925 | + | ENSG00000121716; | CVB5_5Y1,CVB5_5Y |
| hsa_circ_0006501 | + | ENSG00000257923; | CVB5_5Y1,CVB5_5Y |
| hsa_circ_0081751 | - | ENSG00000105821; | CVB5_5Y1,CVB5_5Y |
| hsa_circ_0079440 | + | ENSG00000106443; | CVB5_5Y1,CVB5_5Y |
| hsa_circ_0002699 | + | ENSG00000105976; | CVB5_5Y1,CVB5_5Y |
| hsa_circ_0003655 | + | ENSG00000197157; | CVB5_5Y1,CVB5_5Y |
| hsa_circ_0082444 | + | ENSG00000131558; | CVB5_5Y1,CVB5_5Y |
| hsa_circ_0006357 | - | ENSG00000106462; | CVB5_5Y1,CVB5_5Y |
| hsa_circ_0001766 | - | ENSG00000155660; | CVB5_5Y1,CVB5_5Y |
| hsa_circ_0004351 | + | ENSG00000197024; | CVB5_5Y1,CVB5_5Y |
| hsa_circ_0083176 | + | ENSG00000105993; | CVB5_5Y1,CVB5_5Y |
| hsa_circ_0003162 | + | ENSG00000122507; | CVB5_5Y1,CVB5_5Y |
| hsa_circ_0007501 | - | ENSG00000011275; | CVB5_5Y1,CVB5_5Y |
| hsa_circ_0007417 | - | ENSG00000229180; | CVB5_5Y1,CVB5_5Y |
| hsa_circ_0003866 | - | ENSG00000009954; | CVB5_5Y1,CVB5_5Y |
| hsa_circ_0005588 | + | ENSG00000071462; | CVB5_5Y1,CVB5_5Y |
| hsa_circ_0009012 | - | ENSG00000106089; | CVB5_5Y1,CVB5_5Y |
| hsa_circ_0001638 | + | ENSG00000173214; | CVB5_5Y1,CVB5_5Y |
| hsa_circ_0001641 | - | ENSG00000112339; | CVB5_5Y1,CVB5_5Y |
| hsa_circ_0007218 | + | ENSG00000124523; | CVB5_5Y1,CVB5_5Y |
| hsa_circ_0075796 | - | ENSG00000124795; | CVB5_5Y1,CVB5_5Y |
| hsa_circ_0008846 | - | ENSG00000124795; | CVB5_5Y1,CVB5_5Y |
| hsa_circ_0076178 | - | ENSG00000096063; | CVB5_5Y1,CVB5_5Y |
| hsa_circ_0001608 | - | ENSG00000112651; | CVB5_5Y1,CVB5_5Y |
| hsa_circ_0008285 | + | ENSG00000153046; | CVB5_5Y1,CVB5_5Y |
| hsa_circ_0007874 | + | ENSG00000135297; | CVB5_5Y1,CVB5_5Y |
| hsa_circ_0002465 | + | ENSG00000156535; | CVB5_5Y1,CVB5_5Y |
| hsa_circ_0006131 | - | ENSG00000135316; | CVB5_5Y1,CVB5_5Y |
| hsa_circ_0077292 | - | ENSG00000111880; | CVB5_5Y1,CVB5_5Y |
| hsa_circ_0001619 | - | ENSG00000112159; | CVB5_5Y1,CVB5_5Y |
| hsa_circ_0001529 | - | ENSG00000072364; | CVB5_5Y1,CVB5_5Y |
| hsa_circ_0001531 | + | ENSG00000170606; | CVB5_5Y1,CVB5_5Y |
| hsa_circ_0004854 | - | ENSG00000113648; | CVB5_5Y1,CVB5_5Y |
| hsa_circ_0003280 | - | ENSG00000113013; | CVB5_5Y1,CVB5_5Y |
| hsa_circ_0075341 | - | ENSG00000050748; | CVB5_5Y1,CVB5_5Y |
| hsa_circ_0001470 | - | ENSG00000113384; | CVB5_5Y1,CVB5_5Y |
| hsa_circ_0007071 | + | ENSG00000172262; | CVB5_5Y1,CVB5_5Y |
| hsa_circ_0001479 | + | ENSG00000172262; | CVB5_5Y1,CVB5_5Y |
| hsa_circ_0005730 | + | ENSG00000134058; | CVB5_5Y1,CVB5_5Y |
| hsa_circ_0072954 | + | ENSG00000157107; | CVB5_5Y1,CVB5_5Y |
| hsa_circ_0004405 | - | ENSG00000198780; | CVB5_5Y1,CVB5_5Y |
| hsa_circ_0003550 | - | ENSG00000071127; | CVB5_5Y1,CVB5_5Y |
| hsa_circ_0006935 | - | ENSG00000138801; | CVB5_5Y1,CVB5_5Y |
| hsa_circ_0001436 | + | ENSG00000138802; | CVB5_5Y1,CVB5_5Y |
| hsa_circ_0001438 | + | ENSG00000138709; | CVB5_5Y1,CVB5_5Y |
| hsa_circ_0007619 | + | ENSG00000138709; | CVB5_5Y1,CVB5_5Y |
| hsa_circ_0004731 | - | ENSG00000157869; | CVB5_5Y1,CVB5_5Y |
| hsa_circ_0001445 | + | ENSG00000153147; | CVB5_5Y1,CVB5_5Y |
| hsa_circ_0001447 | - | ENSG00000151612; | CVB5_5Y1,CVB5_5Y |
| hsa_circ_0071422 | - | ENSG00000154447; | CVB5_5Y1,CVB5_5Y |
| hsa_circ_0001459 | + | ENSG00000109674; | CVB5_5Y1,CVB5_5Y |
| hsa_circ_0002212 | - | ENSG00000129187; | CVB5_5Y1,CVB5_5Y |
| hsa_circ_0071615 | - | ENSG00000083857; | CVB5_5Y1,CVB5_5Y |

|                  |   |                        |                   |
|------------------|---|------------------------|-------------------|
| hsa_circ_0008872 | + | ENSG00000063978;       | CVB5_5Y1, CVB5_5Y |
| hsa_circ_0006737 | - | ENSG00000087269;       | CVB5_5Y1, CVB5_5Y |
| hsa_circ_0001400 | - | ENSG00000181826;       | CVB5_5Y1, CVB5_5Y |
| hsa_circ_0001403 | - | ENSG00000035928;       | CVB5_5Y1, CVB5_5Y |
| hsa_circ_0009154 | + | ENSG00000078140;       | CVB5_5Y1, CVB5_5Y |
| hsa_circ_0002590 | + | ENSG00000078140;       | CVB5_5Y1, CVB5_5Y |
| hsa_circ_0069492 | + | ENSG00000078140;       | CVB5_5Y1, CVB5_5Y |
| hsa_circ_0069559 | - | ENSG00000163697;       | CVB5_5Y1, CVB5_5Y |
| hsa_circ_0008453 | - | ENSG00000163697;       | CVB5_5Y1, CVB5_5Y |
| hsa_circ_0005912 | + | ENSG00000145216;       | CVB5_5Y1, CVB5_5Y |
| hsa_circ_0007476 | + | ENSG00000145216;       | CVB5_5Y1, CVB5_5Y |
| hsa_circ_0069748 | + | ENSG00000145216;       | CVB5_5Y1, CVB5_5Y |
| hsa_circ_0069987 | + | ENSG00000163738;       | CVB5_5Y1, CVB5_5Y |
| hsa_circ_0003451 | + | ENSG00000145293;       | CVB5_5Y1, CVB5_5Y |
| hsa_circ_0001421 | - | ENSG00000138674;       | CVB5_5Y1, CVB5_5Y |
| hsa_circ_0001324 | + | ENSG00000114439;       | CVB5_5Y1, CVB5_5Y |
| hsa_circ_0004639 | + | ENSG00000177707;       | CVB5_5Y1, CVB5_5Y |
| hsa_circ_0007315 | + | ENSG00000177707;       | CVB5_5Y1, CVB5_5Y |
| hsa_circ_0066783 | + | ENSG00000144824;       | CVB5_5Y1, CVB5_5Y |
| hsa_circ_0007986 | - | ENSG00000082701;       | CVB5_5Y1, CVB5_5Y |
| hsa_circ_0067103 | - | ENSG00000163848;       | CVB5_5Y1, CVB5_5Y |
| hsa_circ_0003181 | + | ENSG00000159685;       | CVB5_5Y1, CVB5_5Y |
| hsa_circ_0005768 | - | ENSG00000163785;       | CVB5_5Y1, CVB5_5Y |
| hsa_circ_0001359 | - | ENSG00000173889;       | CVB5_5Y1, CVB5_5Y |
| hsa_circ_0001360 | - | ENSG00000173889;       | CVB5_5Y1, CVB5_5Y |
| hsa_circ_0002387 | - | ENSG00000154310;       | CVB5_5Y1, CVB5_5Y |
| hsa_circ_0006248 | - | ENSG00000136527;       | CVB5_5Y1, CVB5_5Y |
| hsa_circ_0007203 | - | ENSG00000075711;       | CVB5_5Y1, CVB5_5Y |
| hsa_circ_0006215 | - | ENSG00000033867;       | CVB5_5Y1, CVB5_5Y |
| hsa_circ_0001277 | - | ENSG00000033867;       | CVB5_5Y1, CVB5_5Y |
| hsa_circ_0001294 | - | ENSG00000173473;       | CVB5_5Y1, CVB5_5Y |
| hsa_circ_0001296 | - | ENSG00000173473;       | CVB5_5Y1, CVB5_5Y |
| hsa_circ_0001307 | + | ENSG00000164080;       | CVB5_5Y1, CVB5_5Y |
| hsa_circ_0001309 | - | ENSG00000114904;       | CVB5_5Y1, CVB5_5Y |
| hsa_circ_0001312 | + | ENSG00000180376;       | CVB5_5Y1, CVB5_5Y |
| hsa_circ_0003540 | - | ENSG00000151276;       | CVB5_5Y1, CVB5_5Y |
| hsa_circ_0003101 | + | ENSG00000144741;       | CVB5_5Y1, CVB5_5Y |
| hsa_circ_0006135 | + | ENSG00000169379;       | CVB5_5Y1, CVB5_5Y |
| hsa_circ_0001062 | + | ENSG00000188177;       | CVB5_5Y1, CVB5_5Y |
| hsa_circ_0001070 | + | ENSG00000048991;       | CVB5_5Y1, CVB5_5Y |
| hsa_circ_0001074 | - | ENSG00000115947;       | CVB5_5Y1, CVB5_5Y |
| hsa_circ_0000978 | - | ENSG00000151779;       | CVB5_5Y1, CVB5_5Y |
| hsa_circ_0008010 | + | ENSG00000115183;       | CVB5_5Y1, CVB5_5Y |
| hsa_circ_0003296 | - | ENSG00000198648;       | CVB5_5Y1, CVB5_5Y |
| hsa_circ_0002141 | + | ENSG00000204186;       | CVB5_5Y1, CVB5_5Y |
| hsa_circ_0008544 | + | n/a                    | CVB5_5Y1, CVB5_5Y |
| hsa_circ_0007648 | - | ENSG00000115568;       | CVB5_5Y1, CVB5_5Y |
| hsa_circ_0058456 | - | ENSG00000286239; ENSG0 | CVB5_5Y1, CVB5_5Y |
| hsa_circ_0008382 | + | ENSG00000185404;       | CVB5_5Y1, CVB5_5Y |
| hsa_circ_0003922 | + | ENSG00000067066;       | CVB5_5Y1, CVB5_5Y |
| hsa_circ_0007321 | + | ENSG00000144535;       | CVB5_5Y1, CVB5_5Y |
| hsa_circ_0003341 | + | ENSG00000204120;       | CVB5_5Y1, CVB5_5Y |
| hsa_circ_0001115 | + | ENSG00000077044;       | CVB5_5Y1, CVB5_5Y |
| hsa_circ_0005059 | - | ENSG00000144504;       | CVB5_5Y1, CVB5_5Y |
| hsa_circ_0000985 | + | ENSG00000243943; ENSG0 | CVB5_5Y1, CVB5_5Y |
| hsa_circ_0006794 | - | ENSG00000138081;       | CVB5_5Y1, CVB5_5Y |
| hsa_circ_0005552 | + | ENSG00000115504;       | CVB5_5Y1, CVB5_5Y |
| hsa_circ_0001023 | + | ENSG00000169621;       | CVB5_5Y1, CVB5_5Y |

|                  |   |                        |                   |
|------------------|---|------------------------|-------------------|
| hsa_circ_0007092 | - | ENSG00000135945;       | CVB5_5Y1, CVB5_5Y |
| hsa_circ_0000116 | + | ENSG00000198162;       | CVB5_5Y1, CVB5_5Y |
| hsa_circ_0000117 | + | ENSG00000198162;       | CVB5_5Y1, CVB5_5Y |
| hsa_circ_0000120 | + | ENSG00000198162;       | CVB5_5Y1, CVB5_5Y |
| hsa_circ_0006470 | + | ENSG00000116688;       | CVB5_5Y1, CVB5_5Y |
| hsa_circ_0000002 | - | ENSG00000078808;       | CVB5_5Y1, CVB5_5Y |
| hsa_circ_0008063 | - | ENSG00000160087;       | CVB5_5Y1, CVB5_5Y |
| hsa_circ_0010023 | - | ENSG00000162496;       | CVB5_5Y1, CVB5_5Y |
| hsa_circ_0013953 | + | ENSG00000131778; ENSG0 | CVB5_5Y1, CVB5_5Y |
| hsa_circ_0000128 | + | ENSG00000163156;       | CVB5_5Y1, CVB5_5Y |
| hsa_circ_0014613 | + | ENSG00000132676;       | CVB5_5Y1, CVB5_5Y |
| hsa_circ_0000019 | + | ENSG00000197312;       | CVB5_5Y1, CVB5_5Y |
| hsa_circ_0006758 | + | ENSG00000143179;       | CVB5_5Y1, CVB5_5Y |
| hsa_circ_0004722 | - | ENSG00000143207;       | CVB5_5Y1, CVB5_5Y |
| hsa_circ_0005522 | + | ENSG00000136643;       | CVB5_5Y1, CVB5_5Y |
| hsa_circ_0000028 | - | ENSG00000090686;       | CVB5_5Y1, CVB5_5Y |
| hsa_circ_0002166 | - | ENSG00000090686;       | CVB5_5Y1, CVB5_5Y |
| hsa_circ_0007739 | - | ENSG00000136628;       | CVB5_5Y1, CVB5_5Y |
| hsa_circ_0000198 | - | ENSG00000135749;       | CVB5_5Y1, CVB5_5Y |
| hsa_circ_0003553 | + | ENSG00000117602;       | CVB5_5Y1, CVB5_5Y |
| hsa_circ_0003940 | + | ENSG00000090273;       | CVB5_5Y1, CVB5_5Y |
| hsa_circ_0005087 | + | ENSG00000090273;       | CVB5_5Y1, CVB5_5Y |
| hsa_circ_0008057 | - | ENSG00000158161;       | CVB5_5Y1, CVB5_5Y |
| hsa_circ_0007895 | - | ENSG00000158161;       | CVB5_5Y1, CVB5_5Y |
| hsa_circ_0006602 | - | ENSG00000116350;       | CVB5_5Y1, CVB5_5Y |
| hsa_circ_0000045 | - | ENSG00000134644;       | CVB5_5Y1, CVB5_5Y |
| hsa_circ_0007249 | + | ENSG00000121766;       | CVB5_5Y1, CVB5_5Y |
| hsa_circ_0003238 | + | ENSG00000084652;       | CVB5_5Y1, CVB5_5Y |
| hsa_circ_0009027 | + | ENSG00000160094;       | CVB5_5Y1, CVB5_5Y |
| hsa_circ_0000061 | - | ENSG00000010803;       | CVB5_5Y1, CVB5_5Y |
| hsa_circ_0008774 | - | ENSG00000159592;       | CVB5_5Y1, CVB5_5Y |
| hsa_circ_0012333 | + | ENSG00000173660;       | CVB5_5Y1, CVB5_5Y |
| hsa_circ_0008657 | + | ENSG00000162607;       | CVB5_5Y1, CVB5_5Y |
| hsa_circ_0006354 | + | ENSG00000049245;       | CVB5_5Y1, CVB5_5Y |
| hsa_circ_0009674 | - | ENSG00000178585;       | CVB5_5Y1, CVB5_5Y |
| hsa_circ_0087905 | - | ENSG00000106771;       | CVB5_5Y1, CVB5_5Y |
| hsa_circ_0002672 | + | ENSG00000011454;       | CVB5_5Y1, CVB5_5Y |
| hsa_circ_0088427 | - | ENSG00000165209;       | CVB5_5Y1, CVB5_5Y |
| hsa_circ_0088614 | + | ENSG00000196814;       | CVB5_5Y1, CVB5_5Y |
| hsa_circ_0005871 | + | ENSG00000130723;       | CVB5_5Y1, CVB5_5Y |
| hsa_circ_0089310 | + | ENSG00000148308;       | CVB5_5Y1, CVB5_5Y |
| hsa_circ_0089371 | - | ENSG00000148300;       | CVB5_5Y1, CVB5_5Y |
| hsa_circ_0006502 | - | ENSG00000148399;       | CVB5_5Y1, CVB5_5Y |
| hsa_circ_0001904 | + | ENSG00000181090;       | CVB5_5Y1, CVB5_5Y |
| hsa_circ_0089727 | + | ENSG00000181090;       | CVB5_5Y1, CVB5_5Y |
| hsa_circ_0001851 | - | ENSG00000137073;       | CVB5_5Y1, CVB5_5Y |
| hsa_circ_0086735 | - | ENSG00000137073;       | CVB5_5Y1, CVB5_5Y |
| hsa_circ_0001860 | + | ENSG00000147905;       | CVB5_5Y1, CVB5_5Y |
| hsa_circ_0006345 | + | ENSG00000120158;       | CVB5_5Y1, CVB5_5Y |
| hsa_circ_0087630 | + | ENSG00000130956;       | CVB5_5Y1, CVB5_5Y |
| hsa_circ_0087631 | + | ENSG00000130956;       | CVB5_5Y1, CVB5_5Y |
| hsa_circ_0006623 | - | ENSG00000070756;       | CVB5_5Y1, CVB5_5Y |
| hsa_circ_0085173 | + | ENSG00000083307;       | CVB5_5Y1, CVB5_5Y |
| hsa_circ_0008849 | + | ENSG00000249859;       | CVB5_5Y1, CVB5_5Y |
| hsa_circ_0002965 | - | ENSG00000123908;       | CVB5_5Y1, CVB5_5Y |
| hsa_circ_0007313 | - | ENSG00000123908;       | CVB5_5Y1, CVB5_5Y |
| hsa_circ_0086154 | - | ENSG00000147799;       | CVB5_5Y1, CVB5_5Y |
| hsa_circ_0083443 | - | ENSG00000129422;       | CVB5_5Y1, CVB5_5Y |

|                    |   |                        |                   |
|--------------------|---|------------------------|-------------------|
| hsa_circ_0007618   | + | ENSG00000147459;       | CVB5_5Y1, CVB5_5Y |
| hsa_circ_0007353   | + | ENSG00000104660;       | CVB5_5Y1, CVB5_5Y |
| hsa_circ_0006376   | + | ENSG00000168172;       | CVB5_5Y1, CVB5_5Y |
| hsa_circ_0007581   | + | ENSG00000104388;       | CVB5_5Y1, CVB5_5Y |
| hsa_circ_0003388   | + | ENSG00000104218;       | CVB5_5Y1, CVB5_5Y |
| hsa_circ_0084889   | + | ENSG00000164953;       | CVB5_5Y1, CVB5_5Y |
| hsa_circ_0084927   | + | ENSG00000104413;       | CVB5_5Y1, CVB5_5Y |
| novel_circ_0002806 | - | ENSG00000134884;       | CVB5_5Y1, CVB5_5Y |
| novel_circ_0002650 | + | ENSG00000258168;       | CVB5_5Y1, CVB5_5Y |
| novel_circ_0002663 | - | ENSG00000251138;       | CVB5_5Y1, CVB5_5Y |
| novel_circ_0001137 | - | ENSG00000110367;       | CVB5_5Y1, CVB5_5Y |
| novel_circ_0001430 | - | ENSG00000175216;       | CVB5_5Y1, CVB5_5Y |
| novel_circ_0001541 | + | ENSG00000173715;       | CVB5_5Y1, CVB5_5Y |
| novel_circ_0000124 | + | n/a                    | CVB5_5Y1, CVB5_5Y |
| novel_circ_0000374 | - | n/a                    | CVB5_5Y1, CVB5_5Y |
| novel_circ_0005636 | + | ENSG00000136448;       | CVB5_5Y1, CVB5_5Y |
| novel_circ_0005739 | - | n/a                    | CVB5_5Y1, CVB5_5Y |
| novel_circ_0005779 | + | ENSG00000166263;       | CVB5_5Y1, CVB5_5Y |
| novel_circ_0006024 | - | n/a                    | CVB5_5Y1, CVB5_5Y |
| novel_circ_0006109 | + | ENSG00000173821;       | CVB5_5Y1, CVB5_5Y |
| novel_circ_0006148 | + | ENSG00000185298;       | CVB5_5Y1, CVB5_5Y |
| novel_circ_0006197 | + | ENSG00000141556;       | CVB5_5Y1, CVB5_5Y |
| novel_circ_0005191 | + | ENSG00000158545;       | CVB5_5Y1, CVB5_5Y |
| novel_circ_0004099 | - | ENSG00000067369;       | CVB5_5Y1, CVB5_5Y |
| novel_circ_0004201 | + | ENSG00000151575;       | CVB5_5Y1, CVB5_5Y |
| novel_circ_0004328 | + | ENSG00000166949;       | CVB5_5Y1, CVB5_5Y |
| novel_circ_0004429 | + | ENSG00000140367;       | CVB5_5Y1, CVB5_5Y |
| novel_circ_0003518 | + | ENSG00000100941;       | CVB5_5Y1, CVB5_5Y |
| novel_circ_0003535 | - | ENSG00000100442;       | CVB5_5Y1, CVB5_5Y |
| novel_circ_0006759 | - | n/a                    | CVB5_5Y1, CVB5_5Y |
| novel_circ_0006772 | - | ENSG00000006016;       | CVB5_5Y1, CVB5_5Y |
| novel_circ_0006852 | - | ENSG00000121289;       | CVB5_5Y1, CVB5_5Y |
| novel_circ_0006440 | + | ENSG00000167216;       | CVB5_5Y1, CVB5_5Y |
| novel_circ_0009963 | + | ENSG00000130638;       | CVB5_5Y1, CVB5_5Y |
| novel_circ_0009270 | + | n/a                    | CVB5_5Y1, CVB5_5Y |
| novel_circ_0009272 | + | n/a                    | CVB5_5Y1, CVB5_5Y |
| novel_circ_0009458 | + | ENSG00000101187;       | CVB5_5Y1, CVB5_5Y |
| novel_circ_0016055 | + | ENSG00000146963; ENSG0 | CVB5_5Y1, CVB5_5Y |
| novel_circ_0016269 | - | ENSG00000136231;       | CVB5_5Y1, CVB5_5Y |
| novel_circ_0016552 | - | ENSG00000229180;       | CVB5_5Y1, CVB5_5Y |
| novel_circ_0015128 | - | ENSG00000135525;       | CVB5_5Y1, CVB5_5Y |
| novel_circ_0015148 | + | ENSG00000009844;       | CVB5_5Y1, CVB5_5Y |
| novel_circ_0015330 | + | ENSG00000130396;       | CVB5_5Y1, CVB5_5Y |
| novel_circ_0015382 | - | ENSG00000124795;       | CVB5_5Y1, CVB5_5Y |
| novel_circ_0015427 | - | ENSG00000204560;       | CVB5_5Y1, CVB5_5Y |
| novel_circ_0015527 | + | ENSG00000124541;       | CVB5_5Y1, CVB5_5Y |
| novel_circ_0015556 | + | ENSG00000198087;       | CVB5_5Y1, CVB5_5Y |
| novel_circ_0015574 | - | ENSG00000012660;       | CVB5_5Y1, CVB5_5Y |
| novel_circ_0015621 | + | ENSG00000285976; ENSG0 | CVB5_5Y1, CVB5_5Y |
| novel_circ_0015686 | - | n/a                    | CVB5_5Y1, CVB5_5Y |
| novel_circ_0013976 | - | ENSG00000251574;       | CVB5_5Y1, CVB5_5Y |
| novel_circ_0014037 | + | ENSG00000177879;       | CVB5_5Y1, CVB5_5Y |
| novel_circ_0014371 | - | ENSG00000145555;       | CVB5_5Y1, CVB5_5Y |
| novel_circ_0014433 | + | n/a                    | CVB5_5Y1, CVB5_5Y |
| novel_circ_0014720 | + | ENSG00000145734;       | CVB5_5Y1, CVB5_5Y |
| novel_circ_0014922 | - | ENSG00000153922;       | CVB5_5Y1, CVB5_5Y |
| novel_circ_0013402 | - | ENSG00000181381;       | CVB5_5Y1, CVB5_5Y |
| novel_circ_0013492 | - | ENSG00000083857;       | CVB5_5Y1, CVB5_5Y |

|                    |   |                        |                   |
|--------------------|---|------------------------|-------------------|
| novel_circ_0011803 | + | ENSG00000177707;       | CVB5_5Y1, CVB5_5Y |
| novel_circ_0012459 | - | ENSG00000163961;       | CVB5_5Y1, CVB5_5Y |
| novel_circ_0012552 | - | ENSG00000235493;       | CVB5_5Y1, CVB5_5Y |
| novel_circ_0012593 | - | ENSG00000144635;       | CVB5_5Y1, CVB5_5Y |
| novel_circ_0012594 | - | ENSG00000144635;       | CVB5_5Y1, CVB5_5Y |
| novel_circ_0012603 | + | ENSG00000182973;       | CVB5_5Y1, CVB5_5Y |
| novel_circ_0012937 | + | n/a                    | CVB5_5Y1, CVB5_5Y |
| novel_circ_0010775 | + | n/a                    | CVB5_5Y1, CVB5_5Y |
| novel_circ_0010779 | + | n/a                    | CVB5_5Y1, CVB5_5Y |
| novel_circ_0010783 | + | n/a                    | CVB5_5Y1, CVB5_5Y |
| novel_circ_0010819 | - | ENSG00000152056; ENSG0 | CVB5_5Y1, CVB5_5Y |
| novel_circ_0010862 | + | ENSG00000185404;       | CVB5_5Y1, CVB5_5Y |
| novel_circ_0011032 | - | ENSG00000138074;       | CVB5_5Y1, CVB5_5Y |
| novel_circ_0011163 | + | ENSG00000234171;       | CVB5_5Y1, CVB5_5Y |
| novel_circ_0011329 | + | ENSG00000119888;       | CVB5_5Y1, CVB5_5Y |
| novel_circ_0011332 | + | ENSG00000119888;       | CVB5_5Y1, CVB5_5Y |
| novel_circ_0011411 | + | ENSG00000173209;       | CVB5_5Y1, CVB5_5Y |
| novel_circ_0011420 | - | ENSG00000115464;       | CVB5_5Y1, CVB5_5Y |
| novel_circ_0011475 | - | ENSG00000082898;       | CVB5_5Y1, CVB5_5Y |
| novel_circ_0007238 | - | ENSG00000162777;       | CVB5_5Y1, CVB5_5Y |
| novel_circ_0007543 | - | ENSG00000215908;       | CVB5_5Y1, CVB5_5Y |
| novel_circ_0007757 | - | ENSG00000285280;       | CVB5_5Y1, CVB5_5Y |
| novel_circ_0008295 | + | ENSG00000157978;       | CVB5_5Y1, CVB5_5Y |
| novel_circ_0008301 | + | ENSG00000130695;       | CVB5_5Y1, CVB5_5Y |
| novel_circ_0008468 | - | ENSG00000134697;       | CVB5_5Y1, CVB5_5Y |
| novel_circ_0008796 | + | ENSG00000198160;       | CVB5_5Y1, CVB5_5Y |
| novel_circ_0008931 | - | ENSG00000142599;       | CVB5_5Y1, CVB5_5Y |
| novel_circ_0018216 | + | ENSG00000086061;       | CVB5_5Y1, CVB5_5Y |
| novel_circ_0018254 | - | ENSG00000137073;       | CVB5_5Y1, CVB5_5Y |
| novel_circ_0018350 | - | ENSG00000183354;       | CVB5_5Y1, CVB5_5Y |
| novel_circ_0016887 | + | ENSG00000104412;       | CVB5_5Y1, CVB5_5Y |
| novel_circ_0017230 | - | ENSG00000120889;       | CVB5_5Y1, CVB5_5Y |
| novel_circ_0017461 | + | ENSG00000171316;       | CVB5_5Y1, CVB5_5Y |
| novel_circ_0017747 | + | ENSG00000132549;       | CVB5_5Y1, CVB5_5Y |
| hsa_circ_0007232   | - | ENSG00000102753;       | CVB5_5Y1, CVB5_5Y |
| hsa_circ_0000416   | + | ENSG00000135679;       | CVB5_5Y1, CVB5_5Y |
| hsa_circ_0017438   | + | ENSG00000047056;       | CVB5_5Y1, CVB5_5Y |
| hsa_circ_0005516   | - | ENSG00000148908;       | CVB5_5Y1, CVB5_5Y |
| hsa_circ_0007759   | - | ENSG00000108506;       | CVB5_5Y1, CVB5_5Y |
| hsa_circ_0000631   | - | ENSG00000159322;       | CVB5_5Y1, CVB5_5Y |
| hsa_circ_0050256   | - | ENSG00000105726;       | CVB5_5Y1, CVB5_5Y |
| hsa_circ_0075648   | + | ENSG00000124523;       | CVB5_5Y1, CVB5_5Y |
| hsa_circ_0078563   | - | ENSG00000120438;       | CVB5_5Y1, CVB5_5Y |
| hsa_circ_0072654   | + | ENSG00000153015;       | CVB5_5Y1, CVB5_5Y |
| hsa_circ_0001413   | + | ENSG00000145216;       | CVB5_5Y1, CVB5_5Y |
| hsa_circ_0001282   | + | ENSG00000144674;       | CVB5_5Y1, CVB5_5Y |
| hsa_circ_0058876   | - | ENSG00000132323;       | CVB5_5Y1, CVB5_5Y |
| hsa_circ_0009246   | - | ENSG00000160087;       | CVB5_5Y1, CVB5_5Y |
| hsa_circ_0014306   | + | ENSG00000143624;       | CVB5_5Y1, CVB5_5Y |
| hsa_circ_0008998   | - | ENSG00000132680;       | CVB5_5Y1, CVB5_5Y |
| hsa_circ_0009040   | - | ENSG00000171603;       | CVB5_5Y1, CVB5_5Y |
| hsa_circ_0007613   | + | ENSG00000130723;       | CVB5_5Y1, CVB5_5Y |
| hsa_circ_0002647   | + | ENSG00000181090;       | CVB5_5Y1, CVB5_5Y |
| hsa_circ_0085673   | - | ENSG00000066827;       | CVB5_5Y1, CVB5_5Y |
| hsa_circ_0001790   | + | ENSG00000129691;       | CVB5_5Y1, CVB5_5Y |
| novel_circ_0001462 | + | ENSG00000070047;       | CVB5_5Y1, CVB5_5Y |
| novel_circ_0006222 | - | ENSG00000175711;       | CVB5_5Y1, CVB5_5Y |
| novel_circ_0004952 | - | n/a                    | CVB5_5Y1, CVB5_5Y |

|                    |   |                        |                   |
|--------------------|---|------------------------|-------------------|
| novel_circ_0004971 | - | ENSG00000141098;       | CVB5_5Y1, CVB5_5Y |
| novel_circ_0003600 | + | ENSG00000258479;       | CVB5_5Y1, CVB5_5Y |
| novel_circ_0015012 | + | ENSG00000196911;       | CVB5_5Y1, CVB5_5Y |
| novel_circ_0007915 | + | ENSG00000162769;       | CVB5_5Y1, CVB5_5Y |
| novel_circ_0009044 | + | ENSG00000173614;       | CVB5_5Y1, CVB5_5Y |
| novel_circ_0018592 | + | ENSG00000095380;       | CVB5_5Y1, CVB5_5Y |
| hsa_circ_0091223   | - | ENSG00000188917;       | CVB5_5Y1, CVB5_5Y |
| hsa_circ_0008539   | + | ENSG00000150403;       | CVB5_5Y1, CVB5_5Y |
| hsa_circ_0026238   | + | ENSG00000161813;       | CVB5_5Y1, CVB5_5Y |
| hsa_circ_0026627   | + | ENSG00000185591;       | CVB5_5Y1, CVB5_5Y |
| hsa_circ_0008194   | - | ENSG00000124942;       | CVB5_5Y1, CVB5_5Y |
| hsa_circ_0020197   | + | ENSG00000107651;       | CVB5_5Y1, CVB5_5Y |
| hsa_circ_0002050   | + | ENSG00000150760;       | CVB5_5Y1, CVB5_5Y |
| hsa_circ_0008883   | + | ENSG00000103326;       | CVB5_5Y1, CVB5_5Y |
| hsa_circ_0003848   | + | ENSG00000080815;       | CVB5_5Y1, CVB5_5Y |
| hsa_circ_0049700   | + | ENSG00000132024;       | CVB5_5Y1, CVB5_5Y |
| hsa_circ_0008214   | - | ENSG00000123159;       | CVB5_5Y1, CVB5_5Y |
| hsa_circ_0047650   | - | ENSG00000141627;       | CVB5_5Y1, CVB5_5Y |
| hsa_circ_0000852   | + | ENSG00000091157;       | CVB5_5Y1, CVB5_5Y |
| hsa_circ_0062156   | - | ENSG00000069998;       | CVB5_5Y1, CVB5_5Y |
| hsa_circ_0005917   | + | ENSG00000111845;       | CVB5_5Y1, CVB5_5Y |
| hsa_circ_0001640   | - | ENSG00000079819;       | CVB5_5Y1, CVB5_5Y |
| hsa_circ_0001574   | + | ENSG00000168566;       | CVB5_5Y1, CVB5_5Y |
| hsa_circ_0002972   | - | ENSG00000146067;       | CVB5_5Y1, CVB5_5Y |
| hsa_circ_0068957   | - | ENSG00000087269;       | CVB5_5Y1, CVB5_5Y |
| hsa_circ_0064802   | + | ENSG00000170248;       | CVB5_5Y1, CVB5_5Y |
| hsa_circ_0065251   | - | ENSG00000173473;       | CVB5_5Y1, CVB5_5Y |
| hsa_circ_0055019   | + | ENSG00000169621;       | CVB5_5Y1, CVB5_5Y |
| hsa_circ_0005986   | + | ENSG00000116731;       | CVB5_5Y1, CVB5_5Y |
| hsa_circ_0003952   | + | ENSG00000143374;       | CVB5_5Y1, CVB5_5Y |
| hsa_circ_0011585   | - | ENSG00000092853;       | CVB5_5Y1, CVB5_5Y |
| novel_circ_0005117 | - | ENSG00000153774;       | CVB5_5Y1, CVB5_5Y |
| novel_circ_0006788 | + | ENSG00000167491;       | CVB5_5Y1, CVB5_5Y |
| novel_circ_0006953 | - | ENSG00000176531;       | CVB5_5Y1, CVB5_5Y |
| novel_circ_0009100 | + | ENSG00000088930;       | CVB5_5Y1, CVB5_5Y |
| novel_circ_0016629 | + | ENSG00000135205;       | CVB5_5Y1, CVB5_5Y |
| novel_circ_0015457 | + | ENSG00000137309;       | CVB5_5Y1, CVB5_5Y |
| novel_circ_0014698 | - | ENSG00000171368;       | CVB5_5Y1, CVB5_5Y |
| novel_circ_0010211 | - | ENSG00000224043;       | CVB5_5Y1, CVB5_5Y |
| novel_circ_0010830 | - | ENSG00000036257;       | CVB5_5Y1, CVB5_5Y |
| hsa_circ_0000374   | + | ENSG00000111203;       | CVB5_5Y1, CVB5_5Y |
| hsa_circ_0025908   | + | ENSG00000134283;       | CVB5_5Y1, CVB5_5Y |
| hsa_circ_0027494   | + | ENSG00000135679;       | CVB5_5Y1, CVB5_5Y |
| hsa_circ_0021644   | + | ENSG00000135387;       | CVB5_5Y1, CVB5_5Y |
| hsa_circ_0042437   | + | ENSG00000128487;       | CVB5_5Y1, CVB5_5Y |
| hsa_circ_0046263   | - | ENSG00000185624;       | CVB5_5Y1, CVB5_5Y |
| hsa_circ_0005725   | - | ENSG00000178741;       | CVB5_5Y1, CVB5_5Y |
| hsa_circ_0006779   | + | ENSG00000140525;       | CVB5_5Y1, CVB5_5Y |
| hsa_circ_0052011   | + | ENSG00000062822;       | CVB5_5Y1, CVB5_5Y |
| hsa_circ_0000958   | - | ENSG00000125503;       | CVB5_5Y1, CVB5_5Y |
| hsa_circ_0000860   | + | ENSG00000060069;       | CVB5_5Y1, CVB5_5Y |
| hsa_circ_0062169   | + | ENSG00000099968;       | CVB5_5Y1, CVB5_5Y |
| hsa_circ_0007004   | + | ENSG00000128563;       | CVB5_5Y1, CVB5_5Y |
| hsa_circ_0001541   | + | ENSG00000131503; ENSG0 | CVB5_5Y1, CVB5_5Y |
| hsa_circ_0064871   | + | ENSG00000172939;       | CVB5_5Y1, CVB5_5Y |
| hsa_circ_0005520   | + | ENSG00000171848;       | CVB5_5Y1, CVB5_5Y |
| hsa_circ_0001124   | + | ENSG00000168395;       | CVB5_5Y1, CVB5_5Y |
| hsa_circ_0015733   | - | ENSG00000116750;       | CVB5_5Y1, CVB5_5Y |

|                    |   |                        |                   |
|--------------------|---|------------------------|-------------------|
| hsa_circ_0006415   | - | ENSG00000135749;       | CVB5_5Y1, CVB5_5Y |
| hsa_circ_0002043   | + | ENSG00000146463;       | CVB5_5Y1, CVB5_5Y |
| hsa_circ_0006388   | + | ENSG00000066697;       | CVB5_5Y1, CVB5_5Y |
| hsa_circ_0001789   | - | ENSG00000156675;       | CVB5_5Y1, CVB5_5Y |
| hsa_circ_0001796   | + | ENSG00000168522; ENSG0 | CVB5_5Y1, CVB5_5Y |
| novel_circ_0001087 | - | ENSG00000137710;       | CVB5_5Y1, CVB5_5Y |
| novel_circ_0003562 | - | ENSG00000165525;       | CVB5_5Y1, CVB5_5Y |
| novel_circ_0009274 | + | n/a                    | CVB5_5Y1, CVB5_5Y |
| novel_circ_0016058 | + | ENSG00000269955; ENSG0 | CVB5_5Y1, CVB5_5Y |
| novel_circ_0016583 | - | ENSG00000277149;       | CVB5_5Y1, CVB5_5Y |
| novel_circ_0015332 | + | ENSG00000130396;       | CVB5_5Y1, CVB5_5Y |
| novel_circ_0014669 | - | ENSG00000123219;       | CVB5_5Y1, CVB5_5Y |
| novel_circ_0011883 | - | ENSG00000051341;       | CVB5_5Y1, CVB5_5Y |
| novel_circ_0011333 | + | ENSG00000119888;       | CVB5_5Y1, CVB5_5Y |
| novel_circ_0016868 | - | ENSG00000251003;       | CVB5_5Y1, CVB5_5Y |
| novel_circ_0016987 | + | ENSG00000286122;       | CVB5_5Y1, CVB5_5Y |
| hsa_circ_0029468   | + | ENSG00000183495;       | CVB5_5Y1, CVB5_5Y |
| hsa_circ_0018553   | + | ENSG00000060339;       | CVB5_5Y1, CVB5_5Y |
| hsa_circ_0003704   | - | ENSG00000103404;       | CVB5_5Y1, CVB5_5Y |
| hsa_circ_0036730   | + | ENSG00000140534;       | CVB5_5Y1, CVB5_5Y |
| hsa_circ_0008479   | + | n/a                    | CVB5_5Y1, CVB5_5Y |
| hsa_circ_0007532   | + | ENSG00000121152;       | CVB5_5Y1, CVB5_5Y |
| hsa_circ_0083757   | - | ENSG00000104228;       | CVB5_5Y1, CVB5_5Y |
| novel_circ_0002516 | + | ENSG00000185591;       | CVB5_5Y1, CVB5_5Y |
| novel_circ_0003597 | + | ENSG00000258479;       | CVB5_5Y1, CVB5_5Y |
| novel_circ_0014022 | - | ENSG00000171444;       | CVB5_5Y1, CVB5_5Y |
| hsa_circ_0030883   | + | ENSG00000213995;       | CVB5_5Y1, CVB5_5Y |
| hsa_circ_0005086   | + | ENSG00000022840;       | CVB5_5Y1, CVB5_5Y |
| hsa_circ_0027058   | - | ENSG00000076108;       | CVB5_5Y1, CVB5_5Y |
| hsa_circ_0044224   | - | ENSG00000004897;       | CVB5_5Y1, CVB5_5Y |
| hsa_circ_0008740   | - | ENSG00000141252;       | CVB5_5Y1, CVB5_5Y |
| hsa_circ_0045319   | - | ENSG00000108854;       | CVB5_5Y1, CVB5_5Y |
| hsa_circ_0008255   | + | ENSG00000103222;       | CVB5_5Y1, CVB5_5Y |
| hsa_circ_0037748   | - | ENSG00000103199;       | CVB5_5Y1, CVB5_5Y |
| hsa_circ_0040569   | + | ENSG00000186153;       | CVB5_5Y1, CVB5_5Y |
| hsa_circ_0049459   | - | ENSG00000205517;       | CVB5_5Y1, CVB5_5Y |
| hsa_circ_0000932   | + | ENSG00000196235;       | CVB5_5Y1, CVB5_5Y |
| hsa_circ_0079385   | + | ENSG00000136247;       | CVB5_5Y1, CVB5_5Y |
| hsa_circ_0003418   | - | ENSG00000204371;       | CVB5_5Y1, CVB5_5Y |
| hsa_circ_0002102   | + | ENSG00000188846;       | CVB5_5Y1, CVB5_5Y |
| hsa_circ_0007198   | - | ENSG00000173473;       | CVB5_5Y1, CVB5_5Y |
| hsa_circ_0005315   | - | ENSG00000134313;       | CVB5_5Y1, CVB5_5Y |
| hsa_circ_0007615   | - | ENSG00000152104;       | CVB5_5Y1, CVB5_5Y |
| hsa_circ_0010850   | - | ENSG00000125944;       | CVB5_5Y1, CVB5_5Y |
| hsa_circ_0000057   | - | ENSG00000043514;       | CVB5_5Y1, CVB5_5Y |
| hsa_circ_0009076   | - | ENSG00000078618;       | CVB5_5Y1, CVB5_5Y |
| hsa_circ_0088398   | - | ENSG00000056586;       | CVB5_5Y1, CVB5_5Y |
| hsa_circ_0007230   | - | ENSG00000119487;       | CVB5_5Y1, CVB5_5Y |
| hsa_circ_0086708   | - | ENSG00000137073;       | CVB5_5Y1, CVB5_5Y |
| hsa_circ_0087606   | + | ENSG00000182150;       | CVB5_5Y1, CVB5_5Y |
| novel_circ_0002295 | + | ENSG00000029153;       | CVB5_5Y1, CVB5_5Y |
| novel_circ_0005902 | - | ENSG00000108510;       | CVB5_5Y1, CVB5_5Y |
| novel_circ_0006147 | + | ENSG00000185298;       | CVB5_5Y1, CVB5_5Y |
| novel_circ_0004434 | + | ENSG00000167196;       | CVB5_5Y1, CVB5_5Y |
| novel_circ_0009450 | + | ENSG00000130703;       | CVB5_5Y1, CVB5_5Y |
| novel_circ_0013977 | - | ENSG00000113504;       | CVB5_5Y1, CVB5_5Y |
| novel_circ_0011125 | + | ENSG00000115760;       | CVB5_5Y1, CVB5_5Y |
| novel_circ_0007348 | - | ENSG00000264522;       | CVB5_5Y1, CVB5_5Y |

|                    |   |                       |                   |
|--------------------|---|-----------------------|-------------------|
| novel_circ_0007476 | - | ENSG00000160075;      | CVB5_5Y1, CVB5_5Y |
| novel_circ_0018097 | + | ENSG00000188986;      | CVB5_5Y1, CVB5_5Y |
| hsa_circ_0027621   | + | ENSG00000186908;      | CVB5_5Y1, CVB5_5Y |
| hsa_circ_0021727   | + | ENSG00000026508;      | CVB5_5Y1, CVB5_5Y |
| hsa_circ_0002677   | + | ENSG00000170836;      | CVB5_5Y1, CVB5_5Y |
| hsa_circ_0004440   | + | ENSG00000007047;      | CVB5_5Y1, CVB5_5Y |
| hsa_circ_0060746   | + | ENSG00000124207;      | CVB5_5Y1, CVB5_5Y |
| hsa_circ_0080026   | - | ENSG00000015676;      | CVB5_5Y1, CVB5_5Y |
| hsa_circ_0078673   | + | ENSG00000130396;      | CVB5_5Y1, CVB5_5Y |
| hsa_circ_0073585   | + | ENSG00000134982;      | CVB5_5Y1, CVB5_5Y |
| hsa_circ_0001456   | - | ENSG00000137601;      | CVB5_5Y1, CVB5_5Y |
| hsa_circ_0009134   | + | ENSG00000181090;      | CVB5_5Y1, CVB5_5Y |
| hsa_circ_0005062   | + | ENSG00000107104;      | CVB5_5Y1, CVB5_5Y |
| hsa_circ_0085268   | - | ENSG00000104517;      | CVB5_5Y1, CVB5_5Y |
| hsa_circ_0004686   | - | ENSG00000169398;      | CVB5_5Y1, CVB5_5Y |
| hsa_circ_0007545   | - | ENSG00000104375;      | CVB5_5Y1, CVB5_5Y |
| novel_circ_0018917 | - | ENSG00000165288;      | CVB5_5Y1, CVB5_5Y |
| novel_circ_0003074 | - | ENSG00000123200;      | CVB5_5Y1, CVB5_5Y |
| novel_circ_0012332 | - | ENSG00000043093;      | CVB5_5Y1, CVB5_5Y |
| novel_circ_0018138 | + | ENSG00000044459;      | CVB5_5Y1, CVB5_5Y |
| hsa_circ_0007401   | - | ENSG00000110713;      | CVB5_5Y1, CVB5_5Y |
| hsa_circ_0008145   | - | ENSG00000138303;      | CVB5_5Y1, CVB5_5Y |
| hsa_circ_0041443   | + | ENSG00000132359;      | CVB5_5Y1, CVB5_5Y |
| hsa_circ_0045202   | + | ENSG00000136485;      | CVB5_5Y1, CVB5_5Y |
| hsa_circ_0002879   | - | ENSG00000141252;      | CVB5_5Y1, CVB5_5Y |
| hsa_circ_0039844   | + | ENSG00000102974;      | CVB5_5Y1, CVB5_5Y |
| hsa_circ_0040321   | - | ENSG00000103043;      | CVB5_5Y1, CVB5_5Y |
| hsa_circ_0000613   | + | ENSG00000140455;      | CVB5_5Y1, CVB5_5Y |
| hsa_circ_0004624   | + | ENSG00000257103;      | CVB5_5Y1, CVB5_5Y |
| hsa_circ_0007022   | + | ENSG00000142230;      | CVB5_5Y1, CVB5_5Y |
| hsa_circ_0001966   | - | ENSG00000142192;      | CVB5_5Y1, CVB5_5Y |
| hsa_circ_0008466   | - | ENSG00000185658;      | CVB5_5Y1, CVB5_5Y |
| hsa_circ_0079668   | + | ENSG00000106052;      | CVB5_5Y1, CVB5_5Y |
| hsa_circ_0004119   | - | ENSG00000112210;      | CVB5_5Y1, CVB5_5Y |
| hsa_circ_0001528   | + | ENSG00000113522;ENSG0 | CVB5_5Y1, CVB5_5Y |
| hsa_circ_0072081   | - | ENSG00000150712;      | CVB5_5Y1, CVB5_5Y |
| hsa_circ_0070272   | - | ENSG00000173085;      | CVB5_5Y1, CVB5_5Y |
| hsa_circ_0007728   | - | ENSG00000206560;      | CVB5_5Y1, CVB5_5Y |
| hsa_circ_0008124   | + | ENSG00000152492;      | CVB5_5Y1, CVB5_5Y |
| hsa_circ_0054034   | - | ENSG00000115808;      | CVB5_5Y1, CVB5_5Y |
| hsa_circ_0054469   | + | ENSG00000095002;      | CVB5_5Y1, CVB5_5Y |
| hsa_circ_0005521   | + | ENSG00000136636;      | CVB5_5Y1, CVB5_5Y |
| hsa_circ_0011542   | + | ENSG00000146463;      | CVB5_5Y1, CVB5_5Y |
| hsa_circ_0009025   | - | ENSG00000080608;      | CVB5_5Y1, CVB5_5Y |
| hsa_circ_0005499   | - | ENSG00000285982;ENSG0 | CVB5_5Y1, CVB5_5Y |
| novel_circ_0003068 | - | ENSG00000123200;      | CVB5_5Y1, CVB5_5Y |
| novel_circ_0002391 | + | ENSG00000120647;      | CVB5_5Y1, CVB5_5Y |
| novel_circ_0000171 | - | ENSG00000187164;      | CVB5_5Y1, CVB5_5Y |
| novel_circ_0005907 | - | ENSG00000108510;      | CVB5_5Y1, CVB5_5Y |
| novel_circ_0015971 | + | n/a                   | CVB5_5Y1, CVB5_5Y |
| novel_circ_0015063 | + | ENSG00000066651;      | CVB5_5Y1, CVB5_5Y |
| novel_circ_0013115 | - | ENSG00000138801;      | CVB5_5Y1, CVB5_5Y |
| novel_circ_0013412 | - | ENSG00000145439;      | CVB5_5Y1, CVB5_5Y |
| novel_circ_0013060 | - | ENSG00000057019;      | CVB5_5Y1, CVB5_5Y |
| novel_circ_0018569 | - | ENSG00000196597;      | CVB5_5Y1, CVB5_5Y |
| hsa_circ_0091508   | + | ENSG00000085185;      | CVB5_5Y1, CVB5_5Y |
| hsa_circ_0001917   | - | ENSG00000147044;      | CVB5_5Y1, CVB5_5Y |
| hsa_circ_0002628   | + | ENSG00000174437;      | CVB5_5Y1, CVB5_5Y |



|                    |   |                        |                   |
|--------------------|---|------------------------|-------------------|
| hsa_circ_0003641   | + | ENSG00000149311;       | CVB5_5Y1, CVB5_5Y |
| hsa_circ_0008542   | - | ENSG00000109118;       | CVB5_5Y1, CVB5_5Y |
| hsa_circ_0002496   | - | ENSG00000062725;       | CVB5_5Y1, CVB5_5Y |
| hsa_circ_0004241   | - | ENSG00000161542;       | CVB5_5Y1, CVB5_5Y |
| hsa_circ_0003592   | + | ENSG00000007545;       | CVB5_5Y1, CVB5_5Y |
| hsa_circ_0041103   | + | ENSG00000141002;       | CVB5_5Y1, CVB5_5Y |
| hsa_circ_0005387   | - | ENSG00000128731;       | CVB5_5Y1, CVB5_5Y |
| hsa_circ_0007349   | + | ENSG00000140455;       | CVB5_5Y1, CVB5_5Y |
| hsa_circ_0003651   | - | ENSG00000103591;       | CVB5_5Y1, CVB5_5Y |
| hsa_circ_0004965   | + | ENSG00000256053;       | CVB5_5Y1, CVB5_5Y |
| hsa_circ_0031433   | - | ENSG00000196792;       | CVB5_5Y1, CVB5_5Y |
| hsa_circ_0004066   | - | ENSG00000105705;       | CVB5_5Y1, CVB5_5Y |
| hsa_circ_0005188   | + | ENSG00000134815;       | CVB5_5Y1, CVB5_5Y |
| hsa_circ_0063411   | + | ENSG00000100354;       | CVB5_5Y1, CVB5_5Y |
| hsa_circ_0004052   | + | ENSG00000101104;       | CVB5_5Y1, CVB5_5Y |
| hsa_circ_0008628   | - | ENSG00000091127;       | CVB5_5Y1, CVB5_5Y |
| hsa_circ_0006565   | + | ENSG00000055130;       | CVB5_5Y1, CVB5_5Y |
| hsa_circ_0002808   | - | ENSG00000006715;       | CVB5_5Y1, CVB5_5Y |
| hsa_circ_0002512   | - | ENSG00000035499;       | CVB5_5Y1, CVB5_5Y |
| hsa_circ_0007747   | - | ENSG00000237187;       | CVB5_5Y1, CVB5_5Y |
| hsa_circ_0006007   | - | ENSG00000109323;       | CVB5_5Y1, CVB5_5Y |
| hsa_circ_0069396   | - | ENSG00000047365;       | CVB5_5Y1, CVB5_5Y |
| hsa_circ_0008547   | - | ENSG00000163697;       | CVB5_5Y1, CVB5_5Y |
| hsa_circ_0003036   | + | ENSG00000180370;       | CVB5_5Y1, CVB5_5Y |
| hsa_circ_0004609   | - | ENSG00000114316;       | CVB5_5Y1, CVB5_5Y |
| hsa_circ_0001316   | - | ENSG00000163946;       | CVB5_5Y1, CVB5_5Y |
| hsa_circ_0002193   | - | ENSG00000198648;       | CVB5_5Y1, CVB5_5Y |
| hsa_circ_0005952   | - | ENSG00000055917;       | CVB5_5Y1, CVB5_5Y |
| hsa_circ_0003926   | - | ENSG00000221978;       | CVB5_5Y1, CVB5_5Y |
| hsa_circ_0000008   | - | ENSG00000078369;       | CVB5_5Y1, CVB5_5Y |
| hsa_circ_0007120   | + | ENSG00000157933;       | CVB5_5Y1, CVB5_5Y |
| hsa_circ_0010906   | - | ENSG00000185436;       | CVB5_5Y1, CVB5_5Y |
| hsa_circ_0000034   | + | ENSG00000117682;       | CVB5_5Y1, CVB5_5Y |
| hsa_circ_0007356   | - | ENSG00000186638;       | CVB5_5Y1, CVB5_5Y |
| hsa_circ_0005460   | + | ENSG00000165304;       | CVB5_5Y1, CVB5_5Y |
| hsa_circ_0005517   | + | ENSG00000165304;       | CVB5_5Y1, CVB5_5Y |
| novel_circ_0018654 | - | ENSG00000125676;       | CVB5_5Y1, CVB5_5Y |
| novel_circ_0002949 | + | ENSG00000122034;       | CVB5_5Y1, CVB5_5Y |
| novel_circ_0003077 | - | ENSG00000123200;       | CVB5_5Y1, CVB5_5Y |
| novel_circ_0000445 | - | ENSG00000107890;       | CVB5_5Y1, CVB5_5Y |
| novel_circ_0004759 | + | ENSG00000090905;       | CVB5_5Y1, CVB5_5Y |
| novel_circ_0003412 | - | ENSG00000254505; ENSG0 | CVB5_5Y1, CVB5_5Y |
| novel_circ_0003685 | + | ENSG00000054654;       | CVB5_5Y1, CVB5_5Y |
| novel_circ_0006785 | + | ENSG00000167491;       | CVB5_5Y1, CVB5_5Y |
| novel_circ_0006470 | - | ENSG00000167306;       | CVB5_5Y1, CVB5_5Y |
| novel_circ_0009833 | - | ENSG00000233080;       | CVB5_5Y1, CVB5_5Y |
| novel_circ_0009617 | - | ENSG00000185658;       | CVB5_5Y1, CVB5_5Y |
| novel_circ_0015185 | - | ENSG00000186625;       | CVB5_5Y1, CVB5_5Y |
| novel_circ_0015778 | + | ENSG00000118412;       | CVB5_5Y1, CVB5_5Y |
| novel_circ_0010629 | + | ENSG00000055044;       | CVB5_5Y1, CVB5_5Y |
| novel_circ_0010787 | + | n/a                    | CVB5_5Y1, CVB5_5Y |
| novel_circ_0007412 | + | ENSG00000143569;       | CVB5_5Y1, CVB5_5Y |
| novel_circ_0008377 | + | ENSG00000142611;       | CVB5_5Y1, CVB5_5Y |
| hsa_circ_0029898   | + | ENSG00000132952;       | CVB5_5Y1, CVB5_5Y |
| hsa_circ_0002485   | + | ENSG00000166377;       | CVB5_5Y1, CVB5_5Y |
| hsa_circ_0060238   | - | ENSG00000080839;       | CVB5_5Y1, CVB5_5Y |
| hsa_circ_0007507   | + | ENSG00000145715;       | CVB5_5Y1, CVB5_5Y |
| hsa_circ_0001337   | + | ENSG00000075785;       | CVB5_5Y1, CVB5_5Y |

|                    |   |                        |                   |
|--------------------|---|------------------------|-------------------|
| hsa_circ_0004581   | - | ENSG00000114316;       | CVB5_5Y1, CVB5_5Y |
| hsa_circ_0007868   | + | ENSG00000031698;       | CVB5_5Y1, CVB5_5Y |
| hsa_circ_0006760   | + | ENSG00000143363;       | CVB5_5Y1, CVB5_5Y |
| hsa_circ_0083756   | - | ENSG00000104228;       | CVB5_5Y1, CVB5_5Y |
| novel_circ_0001576 | + | ENSG00000110075;       | CVB5_5Y1, CVB5_5Y |
| novel_circ_0000961 | - | ENSG00000077147;       | CVB5_5Y1, CVB5_5Y |
| novel_circ_0009846 | - | ENSG00000100353;       | CVB5_5Y1, CVB5_5Y |
| novel_circ_0012004 | - | ENSG00000114686;       | CVB5_5Y1, CVB5_5Y |
| novel_circ_0013026 | + | ENSG00000134077;       | CVB5_5Y1, CVB5_5Y |
| novel_circ_0010097 | + | ENSG00000114999;       | CVB5_5Y1, CVB5_5Y |
| hsa_circ_0001932   | - | ENSG00000085224;       | CVB5_5Y1, CVB5_5Y |
| hsa_circ_0007044   | + | ENSG00000198431;       | CVB5_5Y1, CVB5_5Y |
| hsa_circ_0002783   | - | ENSG00000196498;       | CVB5_5Y1, CVB5_5Y |
| hsa_circ_0002357   | + | ENSG00000110841;       | CVB5_5Y1, CVB5_5Y |
| hsa_circ_0024946   | - | ENSG00000073614;       | CVB5_5Y1, CVB5_5Y |
| hsa_circ_0021843   | - | ENSG00000110497;       | CVB5_5Y1, CVB5_5Y |
| hsa_circ_0008251   | - | ENSG00000165322;       | CVB5_5Y1, CVB5_5Y |
| hsa_circ_0003605   | + | ENSG00000108175;       | CVB5_5Y1, CVB5_5Y |
| hsa_circ_0003258   | - | ENSG00000198740;       | CVB5_5Y1, CVB5_5Y |
| hsa_circ_0046419   | + | ENSG00000141562;       | CVB5_5Y1, CVB5_5Y |
| hsa_circ_0038132   | + | ENSG00000103222;       | CVB5_5Y1, CVB5_5Y |
| hsa_circ_0005818   | + | ENSG00000020426;       | CVB5_5Y1, CVB5_5Y |
| hsa_circ_0050247   | - | ENSG00000105717;       | CVB5_5Y1, CVB5_5Y |
| hsa_circ_0000832   | + | ENSG00000101639;       | CVB5_5Y1, CVB5_5Y |
| hsa_circ_0062948   | + | ENSG00000100150; ENSG0 | CVB5_5Y1, CVB5_5Y |
| hsa_circ_0001172   | - | ENSG00000124224;       | CVB5_5Y1, CVB5_5Y |
| hsa_circ_0005515   | + | ENSG00000135164;       | CVB5_5Y1, CVB5_5Y |
| hsa_circ_0005451   | + | ENSG00000170734;       | CVB5_5Y1, CVB5_5Y |
| hsa_circ_0070590   | - | ENSG00000145348;       | CVB5_5Y1, CVB5_5Y |
| hsa_circ_0005994   | - | ENSG00000135749;       | CVB5_5Y1, CVB5_5Y |
| hsa_circ_0088494   | + | ENSG00000119408;       | CVB5_5Y1, CVB5_5Y |
| novel_circ_0002116 | + | ENSG00000184445;       | CVB5_5Y1, CVB5_5Y |
| novel_circ_0000513 | - | ENSG00000170759;       | CVB5_5Y1, CVB5_5Y |
| novel_circ_0000850 | - | ENSG00000062650;       | CVB5_5Y1, CVB5_5Y |
| novel_circ_0006738 | + | ENSG00000167460;       | CVB5_5Y1, CVB5_5Y |
| novel_circ_0011779 | - | ENSG00000066422;       | CVB5_5Y1, CVB5_5Y |
| novel_circ_0012490 | + | ENSG00000122068;       | CVB5_5Y1, CVB5_5Y |
| novel_circ_0007766 | + | ENSG00000116747;       | CVB5_5Y1, CVB5_5Y |
| novel_circ_0017470 | - | ENSG00000198363;       | CVB5_5Y1, CVB5_5Y |
| hsa_circ_0006628   | - | ENSG00000107745;       | CVB5_5Y1, CVB5_5Y |
| hsa_circ_0043244   | - | ENSG00000278540;       | CVB5_5Y1, CVB5_5Y |
| hsa_circ_0006886   | - | ENSG00000172775;       | CVB5_5Y1, CVB5_5Y |
| hsa_circ_0000532   | + | ENSG00000185246;       | CVB5_5Y1, CVB5_5Y |
| hsa_circ_0001236   | + | ENSG00000100403;       | CVB5_5Y1, CVB5_5Y |
| hsa_circ_0067230   | - | ENSG00000163902;       | CVB5_5Y1, CVB5_5Y |
| hsa_circ_0007344   | - | ENSG00000115761;       | CVB5_5Y1, CVB5_5Y |
| hsa_circ_0013644   | - | ENSG00000009307;       | CVB5_5Y1, CVB5_5Y |
| hsa_circ_0012964   | + | ENSG00000117054;       | CVB5_5Y1, CVB5_5Y |
| novel_circ_0002865 | - | ENSG00000121390;       | CVB5_5Y1, CVB5_5Y |
| novel_circ_0002703 | - | ENSG00000177425;       | CVB5_5Y1, CVB5_5Y |
| novel_circ_0002737 | - | ENSG00000049130;       | CVB5_5Y1, CVB5_5Y |
| novel_circ_0007170 | - | ENSG00000171466;       | CVB5_5Y1, CVB5_5Y |
| novel_circ_0009909 | + | ENSG00000100393;       | CVB5_5Y1, CVB5_5Y |
| novel_circ_0015896 | - | ENSG00000091127;       | CVB5_5Y1, CVB5_5Y |
| novel_circ_0016793 | - | ENSG00000106244;       | CVB5_5Y1, CVB5_5Y |
| novel_circ_0014422 | + | ENSG00000165671;       | CVB5_5Y1, CVB5_5Y |
| hsa_circ_0004278   | + | ENSG00000090889;       | CVB5_5Y1, CVB5_5Y |
| hsa_circ_0003133   | - | ENSG00000084112;       | CVB5_5Y1, CVB5_5Y |

|                    |   |                        |                   |
|--------------------|---|------------------------|-------------------|
| hsa_circ_0041871   | + | ENSG00000181222;       | CVB5_5Y1, CVB5_5Y |
| hsa_circ_0035875   | - | ENSG00000090487;       | CVB5_5Y1, CVB5_5Y |
| hsa_circ_0004578   | + | ENSG00000101752;       | CVB5_5Y1, CVB5_5Y |
| hsa_circ_0003032   | + | ENSG00000151422;       | CVB5_5Y1, CVB5_5Y |
| hsa_circ_0057703   | + | ENSG00000196141;       | CVB5_5Y1, CVB5_5Y |
| hsa_circ_0004916   | + | ENSG00000285542; ENSG0 | CVB5_5Y1, CVB5_5Y |
| hsa_circ_0002321   | + | ENSG00000066027;       | CVB5_5Y1, CVB5_5Y |
| novel_circ_0002476 | + | ENSG00000161813;       | CVB5_5Y1, CVB5_5Y |
| novel_circ_0001767 | + | ENSG00000284057; ENSG0 | CVB5_5Y1, CVB5_5Y |
| novel_circ_0005208 | - | ENSG00000167522;       | CVB5_5Y1, CVB5_5Y |
| novel_circ_0004221 | - | ENSG00000140299;       | CVB5_5Y1, CVB5_5Y |
| novel_circ_0015624 | + | ENSG00000118482;       | CVB5_5Y1, CVB5_5Y |
| novel_circ_0014278 | - | ENSG00000186314;       | CVB5_5Y1, CVB5_5Y |
| novel_circ_0014603 | + | ENSG00000039123;       | CVB5_5Y1, CVB5_5Y |
| novel_circ_0013076 | - | ENSG00000138814;       | CVB5_5Y1, CVB5_5Y |
| novel_circ_0018183 | + | ENSG00000099810;       | CVB5_5Y1, CVB5_5Y |
| hsa_circ_0029974   | + | ENSG00000172915;       | CVB5_5Y2          |
| hsa_circ_0030507   | - | ENSG00000005810;       | CVB5_5Y2          |
| hsa_circ_0006871   | - | ENSG00000125257;       | CVB5_5Y2          |
| hsa_circ_0008092   | - | ENSG00000110880;       | CVB5_5Y2          |
| hsa_circ_0007830   | - | ENSG00000110880;       | CVB5_5Y2          |
| hsa_circ_0028282   | - | ENSG00000089234;       | CVB5_5Y2          |
| hsa_circ_0005005   | - | ENSG00000089154;       | CVB5_5Y2          |
| hsa_circ_0029192   | - | ENSG00000051825;       | CVB5_5Y2          |
| hsa_circ_0025042   | - | ENSG00000111206;       | CVB5_5Y2          |
| hsa_circ_0026302   | - | ENSG00000110925;       | CVB5_5Y2          |
| hsa_circ_0020749   | + | ENSG00000183020;       | CVB5_5Y2          |
| hsa_circ_0024234   | + | ENSG00000149311;       | CVB5_5Y2          |
| hsa_circ_0020764   | - | ENSG00000078902;       | CVB5_5Y2          |
| hsa_circ_0024876   | + | ENSG00000149418;       | CVB5_5Y2          |
| hsa_circ_0024920   | - | ENSG00000151503;       | CVB5_5Y2          |
| hsa_circ_0021569   | + | ENSG00000060749;       | CVB5_5Y2          |
| hsa_circ_0000299   | + | ENSG00000134574;       | CVB5_5Y2          |
| hsa_circ_0022007   | - | ENSG00000149187;       | CVB5_5Y2          |
| hsa_circ_0023321   | + | ENSG00000131626;       | CVB5_5Y2          |
| hsa_circ_0023628   | + | ENSG00000149257;       | CVB5_5Y2          |
| hsa_circ_0003661   | + | ENSG00000137494;       | CVB5_5Y2          |
| hsa_circ_0004117   | - | ENSG00000120029;       | CVB5_5Y2          |
| hsa_circ_0003779   | + | ENSG00000107882;       | CVB5_5Y2          |
| hsa_circ_0019773   | + | ENSG00000270316; ENSG0 | CVB5_5Y2          |
| hsa_circ_0020024   | + | ENSG00000150593;       | CVB5_5Y2          |
| hsa_circ_0000261   | + | ENSG00000108061;       | CVB5_5Y2          |
| hsa_circ_0005312   | + | ENSG00000107651;       | CVB5_5Y2          |
| hsa_circ_0020381   | + | ENSG00000150760;       | CVB5_5Y2          |
| hsa_circ_0006750   | + | ENSG00000108239;       | CVB5_5Y2          |
| hsa_circ_0002723   | - | ENSG00000108953;       | CVB5_5Y2          |
| hsa_circ_0042250   | - | ENSG00000141030;       | CVB5_5Y2          |
| hsa_circ_0008652   | - | ENSG00000177302;       | CVB5_5Y2          |
| hsa_circ_0042364   | + | ENSG00000141127;       | CVB5_5Y2          |
| hsa_circ_0042733   | - | ENSG00000109118;       | CVB5_5Y2          |
| hsa_circ_0004800   | + | ENSG00000160551;       | CVB5_5Y2          |
| hsa_circ_0043750   | - | ENSG00000168259;       | CVB5_5Y2          |
| hsa_circ_0043893   | - | ENSG00000108799;       | CVB5_5Y2          |
| hsa_circ_0008586   | + | ENSG00000108424;       | CVB5_5Y2          |
| hsa_circ_0009137   | + | ENSG00000029725;       | CVB5_5Y2          |
| hsa_circ_0045862   | + | ENSG00000078687;       | CVB5_5Y2          |
| hsa_circ_0045904   | + | ENSG00000087157;       | CVB5_5Y2          |
| hsa_circ_0046128   | - | ENSG00000157637;       | CVB5_5Y2          |

|                  |   |                       |          |
|------------------|---|-----------------------|----------|
| hsa_circ_0003430 | - | ENSG00000176155;      | CVB5_5Y2 |
| hsa_circ_0038085 | + | ENSG00000103222;      | CVB5_5Y2 |
| hsa_circ_0038244 | - | ENSG00000157106;      | CVB5_5Y2 |
| hsa_circ_0038942 | + | ENSG00000013364;      | CVB5_5Y2 |
| hsa_circ_0039100 | + | ENSG00000282034;ENSG0 | CVB5_5Y2 |
| hsa_circ_0037737 | + | ENSG00000102858;      | CVB5_5Y2 |
| hsa_circ_0009167 | - | ENSG00000183723;      | CVB5_5Y2 |
| hsa_circ_0003220 | + | ENSG00000103047;      | CVB5_5Y2 |
| hsa_circ_0002521 | - | ENSG00000214331;      | CVB5_5Y2 |
| hsa_circ_0040496 | - | ENSG00000168411;      | CVB5_5Y2 |
| hsa_circ_0037078 | + | ENSG00000154237;      | CVB5_5Y2 |
| hsa_circ_0035861 | + | ENSG00000166839;      | CVB5_5Y2 |
| hsa_circ_0036356 | - | ENSG00000169375;      | CVB5_5Y2 |
| hsa_circ_0033191 | - | ENSG00000140105;      | CVB5_5Y2 |
| hsa_circ_0033424 | + | ENSG00000131323;      | CVB5_5Y2 |
| hsa_circ_0033431 | + | ENSG00000131323;      | CVB5_5Y2 |
| hsa_circ_0009051 | - | ENSG00000198554;      | CVB5_5Y2 |
| hsa_circ_0000546 | - | ENSG00000072121;      | CVB5_5Y2 |
| hsa_circ_0032464 | + | ENSG00000197555;      | CVB5_5Y2 |
| hsa_circ_0032651 | - | ENSG00000119638;      | CVB5_5Y2 |
| hsa_circ_0006149 | - | ENSG00000079999;      | CVB5_5Y2 |
| hsa_circ_0049330 | + | ENSG00000079805;      | CVB5_5Y2 |
| hsa_circ_0049792 | - | ENSG00000127507;      | CVB5_5Y2 |
| hsa_circ_0049998 | + | ENSG00000130313;      | CVB5_5Y2 |
| hsa_circ_0000925 | - | ENSG00000121289;      | CVB5_5Y2 |
| hsa_circ_0051081 | - | ENSG00000105221;      | CVB5_5Y2 |
| hsa_circ_0004952 | - | ENSG00000160392;      | CVB5_5Y2 |
| hsa_circ_0003061 | - | ENSG00000090013;      | CVB5_5Y2 |
| hsa_circ_0051494 | - | ENSG00000012061;      | CVB5_5Y2 |
| hsa_circ_0048687 | + | ENSG00000127663;      | CVB5_5Y2 |
| hsa_circ_0002941 | + | ENSG00000125733;      | CVB5_5Y2 |
| hsa_circ_0047125 | + | ENSG00000101752;      | CVB5_5Y2 |
| hsa_circ_0047285 | + | ENSG00000168234;      | CVB5_5Y2 |
| hsa_circ_0047473 | + | ENSG00000150477;      | CVB5_5Y2 |
| hsa_circ_0047478 | + | ENSG00000150477;      | CVB5_5Y2 |
| hsa_circ_0047594 | - | ENSG00000078043;      | CVB5_5Y2 |
| hsa_circ_0047676 | - | ENSG00000167306;      | CVB5_5Y2 |
| hsa_circ_0046861 | + | ENSG00000017797;      | CVB5_5Y2 |
| hsa_circ_0062563 | + | ENSG00000099956;      | CVB5_5Y2 |
| hsa_circ_0062610 | + | ENSG00000100014;ENSG0 | CVB5_5Y2 |
| hsa_circ_0006612 | + | ENSG00000101310;      | CVB5_5Y2 |
| hsa_circ_0005759 | + | ENSG00000118705;      | CVB5_5Y2 |
| hsa_circ_0001163 | - | ENSG00000101040;      | CVB5_5Y2 |
| hsa_circ_0060874 | - | ENSG00000054793;      | CVB5_5Y2 |
| hsa_circ_0001186 | + | ENSG00000243927;      | CVB5_5Y2 |
| hsa_circ_0062003 | + | ENSG00000197381;      | CVB5_5Y2 |
| hsa_circ_0006046 | + | ENSG00000160299;      | CVB5_5Y2 |
| hsa_circ_0005705 | - | ENSG00000091127;      | CVB5_5Y2 |
| hsa_circ_0007102 | + | ENSG00000136261;      | CVB5_5Y2 |
| hsa_circ_0079201 | + | ENSG00000106012;      | CVB5_5Y2 |
| hsa_circ_0006073 | + | ENSG00000106052;      | CVB5_5Y2 |
| hsa_circ_0079818 | + | ENSG00000122507;      | CVB5_5Y2 |
| hsa_circ_0079940 | + | ENSG00000065883;      | CVB5_5Y2 |
| hsa_circ_0081309 | + | ENSG00000196367;      | CVB5_5Y2 |
| hsa_circ_0075658 | - | ENSG00000010017;      | CVB5_5Y2 |
| hsa_circ_0078217 | - | ENSG00000186625;      | CVB5_5Y2 |
| hsa_circ_0006793 | + | ENSG00000120254;      | CVB5_5Y2 |
| hsa_circ_0076157 | - | ENSG00000096060;      | CVB5_5Y2 |

|                  |   |                       |          |
|------------------|---|-----------------------|----------|
| hsa_circ_0076710 | - | ENSG00000244694;      | CVB5_5Y2 |
| hsa_circ_0008924 | - | ENSG00000151914;      | CVB5_5Y2 |
| hsa_circ_0008325 | - | ENSG00000112210;      | CVB5_5Y2 |
| hsa_circ_0075561 | + | ENSG00000124782;      | CVB5_5Y2 |
| hsa_circ_0077422 | - | ENSG00000132424;      | CVB5_5Y2 |
| hsa_circ_0073772 | + | ENSG00000064651;      | CVB5_5Y2 |
| hsa_circ_0003180 | + | ENSG00000113615;      | CVB5_5Y2 |
| hsa_circ_0073993 | + | ENSG00000113615;      | CVB5_5Y2 |
| hsa_circ_0073994 | + | ENSG00000113615;      | CVB5_5Y2 |
| hsa_circ_0074069 | - | ENSG00000031003;      | CVB5_5Y2 |
| hsa_circ_0006995 | - | ENSG00000113013;      | CVB5_5Y2 |
| hsa_circ_0006674 | + | ENSG00000038382;      | CVB5_5Y2 |
| hsa_circ_0074391 | + | ENSG00000156463;      | CVB5_5Y2 |
| hsa_circ_0074854 | + | ENSG00000038274;      | CVB5_5Y2 |
| hsa_circ_0008047 | + | ENSG00000157107;      | CVB5_5Y2 |
| hsa_circ_0073132 | - | ENSG00000152413;      | CVB5_5Y2 |
| hsa_circ_0004700 | + | ENSG00000198856;      | CVB5_5Y2 |
| hsa_circ_0071291 | + | ENSG00000109654;      | CVB5_5Y2 |
| hsa_circ_0006225 | + | ENSG00000121211;      | CVB5_5Y2 |
| hsa_circ_0006366 | - | ENSG00000154447;      | CVB5_5Y2 |
| hsa_circ_0069837 | + | ENSG00000174780;      | CVB5_5Y2 |
| hsa_circ_0070097 | + | ENSG00000138759;      | CVB5_5Y2 |
| hsa_circ_0066846 | - | ENSG00000181722;      | CVB5_5Y2 |
| hsa_circ_0067594 | - | ENSG00000114126;      | CVB5_5Y2 |
| hsa_circ_0007306 | + | ENSG00000175166;      | CVB5_5Y2 |
| hsa_circ_0001377 | - | ENSG00000061938;      | CVB5_5Y2 |
| hsa_circ_0065259 | - | ENSG00000173473;      | CVB5_5Y2 |
| hsa_circ_0007994 | - | ENSG00000173473;      | CVB5_5Y2 |
| hsa_circ_0065347 | - | ENSG00000047849;      | CVB5_5Y2 |
| hsa_circ_0007196 | + | ENSG00000003756;      | CVB5_5Y2 |
| hsa_circ_0006226 | + | ENSG00000144724;      | CVB5_5Y2 |
| hsa_circ_0007250 | - | ENSG00000143870;      | CVB5_5Y2 |
| hsa_circ_0007186 | + | ENSG00000144118;      | CVB5_5Y2 |
| hsa_circ_0005533 | - | ENSG00000151779;      | CVB5_5Y2 |
| hsa_circ_0057168 | - | ENSG00000116044;      | CVB5_5Y2 |
| hsa_circ_0002087 | - | ENSG00000187231;      | CVB5_5Y2 |
| hsa_circ_0058565 | - | ENSG00000153827;      | CVB5_5Y2 |
| hsa_circ_0006391 | - | ENSG00000115687;      | CVB5_5Y2 |
| hsa_circ_0053035 | - | ENSG00000138101;      | CVB5_5Y2 |
| hsa_circ_0053343 | + | ENSG00000163811;      | CVB5_5Y2 |
| hsa_circ_0053394 | - | ENSG00000162961;ENSG0 | CVB5_5Y2 |
| hsa_circ_0000993 | - | ENSG00000119787;      | CVB5_5Y2 |
| hsa_circ_0054706 | + | ENSG00000162929;      | CVB5_5Y2 |
| hsa_circ_0001021 | + | ENSG00000119844;      | CVB5_5Y2 |
| hsa_circ_0006251 | + | ENSG00000187605;      | CVB5_5Y2 |
| hsa_circ_0055426 | - | ENSG00000115486;      | CVB5_5Y2 |
| hsa_circ_0009682 | + | ENSG00000162444;      | CVB5_5Y2 |
| hsa_circ_0009732 | + | ENSG00000142657;      | CVB5_5Y2 |
| hsa_circ_0010024 | - | ENSG00000162496;      | CVB5_5Y2 |
| hsa_circ_0006851 | + | ENSG00000143379;      | CVB5_5Y2 |
| hsa_circ_0014558 | - | ENSG00000116539;      | CVB5_5Y2 |
| hsa_circ_0000140 | - | ENSG00000132680;      | CVB5_5Y2 |
| hsa_circ_0010048 | + | ENSG00000197312;      | CVB5_5Y2 |
| hsa_circ_0014824 | - | ENSG00000132694;      | CVB5_5Y2 |
| hsa_circ_0015211 | + | ENSG00000117523;      | CVB5_5Y2 |
| hsa_circ_0015211 | + | ENSG00000117523;      | CVB5_5Y2 |
| hsa_circ_0007538 | + | ENSG00000157181;      | CVB5_5Y2 |
| hsa_circ_0010536 | - | ENSG00000090686;      | CVB5_5Y2 |

|                    |   |                       |          |
|--------------------|---|-----------------------|----------|
| hsa_circ_0002720   | + | ENSG00000133216;      | CVB5_5Y2 |
| hsa_circ_0004802   | + | ENSG00000117602;      | CVB5_5Y2 |
| hsa_circ_0011946   | - | ENSG00000010803;      | CVB5_5Y2 |
| hsa_circ_0012363   | - | ENSG00000123473;      | CVB5_5Y2 |
| hsa_circ_0012460   | + | ENSG00000117859;      | CVB5_5Y2 |
| hsa_circ_0006676   | - | ENSG00000058804;      | CVB5_5Y2 |
| hsa_circ_0012732   | - | ENSG00000162601;      | CVB5_5Y2 |
| hsa_circ_0009527   | - | ENSG00000162408;      | CVB5_5Y2 |
| hsa_circ_0089078   | + | ENSG00000148358;      | CVB5_5Y2 |
| hsa_circ_0089131   | + | ENSG00000097007;      | CVB5_5Y2 |
| hsa_circ_0002407   | + | ENSG00000197724;      | CVB5_5Y2 |
| hsa_circ_0002796   | + | ENSG00000197816;ENSG0 | CVB5_5Y2 |
| hsa_circ_0002125   | + | ENSG00000131773;      | CVB5_5Y2 |
| hsa_circ_0083270   | + | ENSG00000104728;ENSG0 | CVB5_5Y2 |
| hsa_circ_0002131   | + | ENSG00000104765;      | CVB5_5Y2 |
| hsa_circ_0008397   | + | ENSG00000168522;      | CVB5_5Y2 |
| hsa_circ_0084281   | - | ENSG00000253729;      | CVB5_5Y2 |
| hsa_circ_0084336   | - | ENSG00000253729;      | CVB5_5Y2 |
| hsa_circ_0002576   | - | ENSG00000251136;      | CVB5_5Y2 |
| hsa_circ_0008608   | - | ENSG00000175305;      | CVB5_5Y2 |
| novel_circ_0018769 | - | ENSG00000180815;      | CVB5_5Y2 |
| novel_circ_0018906 | - | ENSG00000085224;      | CVB5_5Y2 |
| novel_circ_0018908 | - | ENSG00000085224;      | CVB5_5Y2 |
| novel_circ_0018912 | + | ENSG00000165240;      | CVB5_5Y2 |
| novel_circ_0018926 | + | ENSG00000101849;      | CVB5_5Y2 |
| novel_circ_0002832 | + | ENSG00000139842;      | CVB5_5Y2 |
| novel_circ_0002897 | - | ENSG00000132953;      | CVB5_5Y2 |
| novel_circ_0003196 | - | ENSG00000139746;      | CVB5_5Y2 |
| novel_circ_0003237 | - | ENSG00000102595;      | CVB5_5Y2 |
| novel_circ_0001833 | - | ENSG00000075188;      | CVB5_5Y2 |
| novel_circ_0001850 | - | ENSG00000120837;      | CVB5_5Y2 |
| novel_circ_0001861 | + | ENSG00000198431;      | CVB5_5Y2 |
| novel_circ_0001979 | - | ENSG00000111300;      | CVB5_5Y2 |
| novel_circ_0002008 | - | ENSG00000111344;      | CVB5_5Y2 |
| novel_circ_0002085 | - | ENSG00000212694;ENSG0 | CVB5_5Y2 |
| novel_circ_0002087 | + | ENSG00000110801;      | CVB5_5Y2 |
| novel_circ_0002089 | + | ENSG00000110987;      | CVB5_5Y2 |
| novel_circ_0002099 | - | ENSG00000130779;      | CVB5_5Y2 |
| novel_circ_0002145 | - | ENSG00000139697;      | CVB5_5Y2 |
| novel_circ_0002289 | - | ENSG00000064115;      | CVB5_5Y2 |
| novel_circ_0002455 | + | ENSG00000123352;      | CVB5_5Y2 |
| novel_circ_0002486 | + | ENSG00000066084;      | CVB5_5Y2 |
| novel_circ_0002565 | + | ENSG00000061987;      | CVB5_5Y2 |
| novel_circ_0002573 | + | ENSG00000196935;      | CVB5_5Y2 |
| novel_circ_0002754 | - | ENSG00000102189;      | CVB5_5Y2 |
| novel_circ_0001008 | - | ENSG00000137692;      | CVB5_5Y2 |
| novel_circ_0001029 | + | ENSG00000177112;      | CVB5_5Y2 |
| novel_circ_0001052 | + | ENSG00000285696;      | CVB5_5Y2 |
| novel_circ_0001114 | - | ENSG00000137656;      | CVB5_5Y2 |
| novel_circ_0001527 | - | ENSG00000168056;      | CVB5_5Y2 |
| novel_circ_0001547 | - | ENSG00000177030;      | CVB5_5Y2 |
| novel_circ_0001580 | + | ENSG00000110075;      | CVB5_5Y2 |
| novel_circ_0001743 | + | ENSG00000254860;      | CVB5_5Y2 |
| novel_circ_0001760 | + | ENSG00000166004;      | CVB5_5Y2 |
| novel_circ_0000036 | - | ENSG00000198408;      | CVB5_5Y2 |
| novel_circ_0000066 | + | ENSG00000107862;      | CVB5_5Y2 |
| novel_circ_0000135 | + | n/a                   | CVB5_5Y2 |
| novel_circ_0000139 | + | ENSG00000148737;      | CVB5_5Y2 |

|                    |   |                       |          |
|--------------------|---|-----------------------|----------|
| novel_circ_0000176 | - | ENSG00000107560;      | CVB5_5Y2 |
| novel_circ_0000177 | + | ENSG00000148426;      | CVB5_5Y2 |
| novel_circ_0000179 | - | ENSG00000151893;      | CVB5_5Y2 |
| novel_circ_0000204 | - | ENSG00000151923;      | CVB5_5Y2 |
| novel_circ_0000360 | + | ENSG00000065328;      | CVB5_5Y2 |
| novel_circ_0000378 | - | ENSG00000152464;ENSG0 | CVB5_5Y2 |
| novel_circ_0000441 | - | ENSG00000136754;      | CVB5_5Y2 |
| novel_circ_0000558 | - | ENSG00000151240;      | CVB5_5Y2 |
| novel_circ_0000571 | - | ENSG00000172671;      | CVB5_5Y2 |
| novel_circ_0000573 | - | ENSG00000172671;      | CVB5_5Y2 |
| novel_circ_0000705 | - | ENSG00000138346;      | CVB5_5Y2 |
| novel_circ_0000907 | - | ENSG00000119912;      | CVB5_5Y2 |
| novel_circ_0000921 | - | ENSG00000138119;      | CVB5_5Y2 |
| novel_circ_0000934 | - | ENSG00000173145;      | CVB5_5Y2 |
| novel_circ_0000936 | + | ENSG00000108239;      | CVB5_5Y2 |
| novel_circ_0000955 | + | ENSG00000177853;      | CVB5_5Y2 |
| novel_circ_0005332 | + | ENSG00000141127;      | CVB5_5Y2 |
| novel_circ_0005395 | + | ENSG00000109111;      | CVB5_5Y2 |
| novel_circ_0005415 | + | ENSG00000126653;      | CVB5_5Y2 |
| novel_circ_0005549 | + | ENSG00000108344;      | CVB5_5Y2 |
| novel_circ_0005659 | - | ENSG00000141456;      | CVB5_5Y2 |
| novel_circ_0005809 | - | ENSG00000108395;      | CVB5_5Y2 |
| novel_circ_0005970 | - | ENSG00000198920;      | CVB5_5Y2 |
| novel_circ_0005997 | + | ENSG00000171634;      | CVB5_5Y2 |
| novel_circ_0006074 | - | ENSG00000070495;      | CVB5_5Y2 |
| novel_circ_0006135 | - | ENSG00000182446;      | CVB5_5Y2 |
| novel_circ_0004648 | + | ENSG00000072864;      | CVB5_5Y2 |
| novel_circ_0004735 | + | ENSG00000103319;      | CVB5_5Y2 |
| novel_circ_0004834 | + | ENSG00000213918;      | CVB5_5Y2 |
| novel_circ_0004859 | - | ENSG00000171241;      | CVB5_5Y2 |
| novel_circ_0004905 | + | ENSG00000121274;      | CVB5_5Y2 |
| novel_circ_0004937 | + | ENSG00000102900;      | CVB5_5Y2 |
| novel_circ_0005048 | + | ENSG00000189091;      | CVB5_5Y2 |
| novel_circ_0005049 | + | ENSG00000189091;      | CVB5_5Y2 |
| novel_circ_0005051 | + | ENSG00000189091;      | CVB5_5Y2 |
| novel_circ_0003961 | - | ENSG00000185418;      | CVB5_5Y2 |
| novel_circ_0004061 | - | ENSG00000128908;      | CVB5_5Y2 |
| novel_circ_0004195 | + | ENSG00000069943;      | CVB5_5Y2 |
| novel_circ_0004463 | + | ENSG00000140403;      | CVB5_5Y2 |
| novel_circ_0004486 | - | ENSG00000117899;      | CVB5_5Y2 |
| novel_circ_0004542 | + | ENSG00000140575;      | CVB5_5Y2 |
| novel_circ_0004547 | - | ENSG00000284946;ENSG0 | CVB5_5Y2 |
| novel_circ_0003276 | + | ENSG00000176473;      | CVB5_5Y2 |
| novel_circ_0003368 | + | ENSG00000066735;      | CVB5_5Y2 |
| novel_circ_0003626 | - | ENSG00000198554;      | CVB5_5Y2 |
| novel_circ_0003629 | - | ENSG00000198554;      | CVB5_5Y2 |
| novel_circ_0003656 | - | ENSG00000100612;      | CVB5_5Y2 |
| novel_circ_0003922 | + | ENSG00000100749;      | CVB5_5Y2 |
| novel_circ_0006762 | + | ENSG00000130479;      | CVB5_5Y2 |
| novel_circ_0006845 | - | ENSG00000105186;      | CVB5_5Y2 |
| novel_circ_0007041 | + | ENSG00000126464;      | CVB5_5Y2 |
| novel_circ_0007044 | + | ENSG00000104973;      | CVB5_5Y2 |
| novel_circ_0007088 | - | ENSG00000167608;      | CVB5_5Y2 |
| novel_circ_0007107 | + | ENSG00000160633;      | CVB5_5Y2 |
| novel_circ_0006383 | + | ENSG00000101596;      | CVB5_5Y2 |
| novel_circ_0006416 | + | ENSG00000075643;      | CVB5_5Y2 |
| novel_circ_0009824 | + | ENSG00000242082;      | CVB5_5Y2 |
| novel_circ_0009072 | - | ENSG00000089048;      | CVB5_5Y2 |

|                    |   |                       |          |
|--------------------|---|-----------------------|----------|
| novel_circ_0009276 | + | n/a                   | CVB5_5Y2 |
| novel_circ_0009325 | - | ENSG00000198026;      | CVB5_5Y2 |
| novel_circ_0009358 | + | ENSG00000124207;      | CVB5_5Y2 |
| novel_circ_0009360 | + | ENSG00000124207;      | CVB5_5Y2 |
| novel_circ_0009379 | - | ENSG00000124201;      | CVB5_5Y2 |
| novel_circ_0009464 | - | ENSG00000101191;      | CVB5_5Y2 |
| novel_circ_0009499 | + | ENSG00000155313;      | CVB5_5Y2 |
| novel_circ_0009577 | + | ENSG00000159256;      | CVB5_5Y2 |
| novel_circ_0009665 | - | ENSG00000186866;      | CVB5_5Y2 |
| novel_circ_0009666 | + | ENSG00000223768;      | CVB5_5Y2 |
| novel_circ_0015857 | + | ENSG00000105819;ENSG0 | CVB5_5Y2 |
| novel_circ_0016026 | + | ENSG00000131558;      | CVB5_5Y2 |
| novel_circ_0016042 | - | ENSG00000122778;      | CVB5_5Y2 |
| novel_circ_0016060 | - | ENSG00000064393;      | CVB5_5Y2 |
| novel_circ_0016082 | - | ENSG00000146904;      | CVB5_5Y2 |
| novel_circ_0016309 | - | ENSG00000070882;      | CVB5_5Y2 |
| novel_circ_0016328 | + | ENSG00000106052;      | CVB5_5Y2 |
| novel_circ_0016338 | - | ENSG00000136193;      | CVB5_5Y2 |
| novel_circ_0016526 | - | ENSG00000169919;      | CVB5_5Y2 |
| novel_circ_0016721 | + | ENSG00000127914;      | CVB5_5Y2 |
| novel_circ_0015167 | - | ENSG00000146414;      | CVB5_5Y2 |
| novel_circ_0015215 | + | ENSG00000131016;      | CVB5_5Y2 |
| novel_circ_0015436 | - | ENSG00000204463;      | CVB5_5Y2 |
| novel_circ_0015533 | + | ENSG00000137221;      | CVB5_5Y2 |
| novel_circ_0015699 | - | ENSG00000005700;      | CVB5_5Y2 |
| novel_circ_0014106 | - | ENSG00000273217;ENSG0 | CVB5_5Y2 |
| novel_circ_0014276 | - | ENSG00000186314;      | CVB5_5Y2 |
| novel_circ_0014292 | + | ENSG00000091009;      | CVB5_5Y2 |
| novel_circ_0014315 | + | ENSG00000145907;      | CVB5_5Y2 |
| novel_circ_0014518 | - | ENSG00000197603;      | CVB5_5Y2 |
| novel_circ_0014520 | - | ENSG00000113569;      | CVB5_5Y2 |
| novel_circ_0014539 | + | ENSG00000082068;      | CVB5_5Y2 |
| novel_circ_0014778 | - | ENSG00000132842;      | CVB5_5Y2 |
| novel_circ_0014787 | + | ENSG00000085365;      | CVB5_5Y2 |
| novel_circ_0014809 | - | ENSG00000164300;      | CVB5_5Y2 |
| novel_circ_0013099 | - | ENSG00000138777;      | CVB5_5Y2 |
| novel_circ_0013104 | - | ENSG00000236699;ENSG0 | CVB5_5Y2 |
| novel_circ_0013312 | + | ENSG00000071205;      | CVB5_5Y2 |
| novel_circ_0013384 | - | ENSG00000171497;      | CVB5_5Y2 |
| novel_circ_0013440 | - | ENSG00000109576;      | CVB5_5Y2 |
| novel_circ_0013457 | - | ENSG00000178177;      | CVB5_5Y2 |
| novel_circ_0013541 | - | ENSG00000281501;ENSG0 | CVB5_5Y2 |
| novel_circ_0013642 | + | ENSG00000078177;      | CVB5_5Y2 |
| novel_circ_0013660 | - | ENSG00000163697;      | CVB5_5Y2 |
| novel_circ_0013672 | - | ENSG00000145220;      | CVB5_5Y2 |
| novel_circ_0013740 | + | ENSG00000145216;      | CVB5_5Y2 |
| novel_circ_0013766 | + | ENSG00000013288;      | CVB5_5Y2 |
| novel_circ_0013768 | - | ENSG00000033178;      | CVB5_5Y2 |
| novel_circ_0011781 | - | ENSG00000066422;      | CVB5_5Y2 |
| novel_circ_0011861 | - | n/a                   | CVB5_5Y2 |
| novel_circ_0011910 | + | ENSG00000132170;      | CVB5_5Y2 |
| novel_circ_0011945 | - | ENSG00000114520;      | CVB5_5Y2 |
| novel_circ_0011958 | + | ENSG00000073111;      | CVB5_5Y2 |
| novel_circ_0012415 | + | ENSG00000188001;      | CVB5_5Y2 |
| novel_circ_0012488 | - | ENSG00000075711;      | CVB5_5Y2 |
| novel_circ_0012491 | + | ENSG00000122068;      | CVB5_5Y2 |
| novel_circ_0012493 | + | ENSG00000122068;      | CVB5_5Y2 |
| novel_circ_0012595 | + | ENSG00000182973;      | CVB5_5Y2 |



|                    |   |                       |          |
|--------------------|---|-----------------------|----------|
| novel_circ_0012733 | - | ENSG00000181555;      | CVB5_5Y2 |
| novel_circ_0012780 | - | ENSG00000173473;      | CVB5_5Y2 |
| novel_circ_0012838 | + | ENSG00000003756;      | CVB5_5Y2 |
| novel_circ_0012907 | - | ENSG00000163947;      | CVB5_5Y2 |
| novel_circ_0010063 | + | ENSG00000163006;      | CVB5_5Y2 |
| novel_circ_0010078 | - | n/a                   | CVB5_5Y2 |
| novel_circ_0010140 | + | ENSG00000144118;      | CVB5_5Y2 |
| novel_circ_0010237 | - | ENSG00000076003;      | CVB5_5Y2 |
| novel_circ_0010264 | + | ENSG00000080345;      | CVB5_5Y2 |
| novel_circ_0010351 | + | ENSG00000136536;      | CVB5_5Y2 |
| novel_circ_0010413 | - | ENSG00000198586;      | CVB5_5Y2 |
| novel_circ_0010527 | - | n/a                   | CVB5_5Y2 |
| novel_circ_0010816 | + | ENSG00000123983;      | CVB5_5Y2 |
| novel_circ_0010967 | - | ENSG00000122085;      | CVB5_5Y2 |
| novel_circ_0011037 | - | ENSG00000138002;      | CVB5_5Y2 |
| novel_circ_0011154 | + | ENSG00000049323;      | CVB5_5Y2 |
| novel_circ_0011225 | - | ENSG00000205111;      | CVB5_5Y2 |
| novel_circ_0011235 | - | ENSG00000138050;      | CVB5_5Y2 |
| novel_circ_0011415 | - | ENSG00000115464;      | CVB5_5Y2 |
| novel_circ_0011436 | - | ENSG00000115464;      | CVB5_5Y2 |
| novel_circ_0011649 | + | ENSG00000168883;      | CVB5_5Y2 |
| novel_circ_0011686 | + | ENSG00000119203;      | CVB5_5Y2 |
| novel_circ_0011748 | + | ENSG00000158417;      | CVB5_5Y2 |
| novel_circ_0007261 | + | ENSG00000118655;      | CVB5_5Y2 |
| novel_circ_0007263 | - | ENSG00000197323;      | CVB5_5Y2 |
| novel_circ_0007375 | + | ENSG00000143458;      | CVB5_5Y2 |
| novel_circ_0007502 | + | ENSG00000065526;      | CVB5_5Y2 |
| novel_circ_0007691 | + | ENSG00000135837;      | CVB5_5Y2 |
| novel_circ_0007728 | - | ENSG00000116406;      | CVB5_5Y2 |
| novel_circ_0007767 | - | ENSG00000023572;      | CVB5_5Y2 |
| novel_circ_0007940 | + | ENSG00000117724;      | CVB5_5Y2 |
| novel_circ_0007971 | - | ENSG00000136628;      | CVB5_5Y2 |
| novel_circ_0007975 | - | ENSG00000136628;      | CVB5_5Y2 |
| novel_circ_0008108 | + | ENSG00000004487;ENSG0 | CVB5_5Y2 |
| novel_circ_0008167 | - | ENSG00000125944;      | CVB5_5Y2 |
| novel_circ_0008277 | - | ENSG00000162851;      | CVB5_5Y2 |
| novel_circ_0008352 | + | ENSG00000060656;      | CVB5_5Y2 |
| novel_circ_0008353 | + | ENSG00000060656;      | CVB5_5Y2 |
| novel_circ_0008355 | - | ENSG00000134644;      | CVB5_5Y2 |
| novel_circ_0008392 | + | ENSG00000025800;      | CVB5_5Y2 |
| novel_circ_0008402 | - | ENSG00000176261;      | CVB5_5Y2 |
| novel_circ_0008416 | - | ENSG00000163867;ENSG0 | CVB5_5Y2 |
| novel_circ_0008436 | - | ENSG00000142687;      | CVB5_5Y2 |
| novel_circ_0008496 | + | ENSG00000117000;      | CVB5_5Y2 |
| novel_circ_0017821 | - | ENSG00000136813;      | CVB5_5Y2 |
| novel_circ_0017866 | - | ENSG00000095397;      | CVB5_5Y2 |
| novel_circ_0017875 | - | ENSG00000136861;      | CVB5_5Y2 |
| novel_circ_0018182 | + | ENSG00000099810;      | CVB5_5Y2 |
| novel_circ_0018325 | - | ENSG00000107249;      | CVB5_5Y2 |
| novel_circ_0018379 | + | ENSG00000119125;      | CVB5_5Y2 |
| novel_circ_0018409 | - | n/a                   | CVB5_5Y2 |
| novel_circ_0018455 | - | ENSG00000135052;      | CVB5_5Y2 |
| novel_circ_0016833 | - | ENSG00000104517;      | CVB5_5Y2 |
| novel_circ_0016856 | - | ENSG00000247081;      | CVB5_5Y2 |
| novel_circ_0016981 | + | ENSG00000156831;      | CVB5_5Y2 |
| novel_circ_0017236 | + | ENSG00000147459;      | CVB5_5Y2 |
| novel_circ_0017463 | + | ENSG00000171316;      | CVB5_5Y2 |
| novel_circ_0017614 | + | ENSG00000104325;      | CVB5_5Y2 |

|                    |   |                       |                  |
|--------------------|---|-----------------------|------------------|
| novel_circ_0017643 | + | ENSG00000164953;      | CVB5_5Y2         |
| hsa_circ_0006430   | - | ENSG00000110713;      | CVB5_5Y2,Con_5Y1 |
| hsa_circ_0005861   | - | ENSG00000133316;      | CVB5_5Y2,Con_5Y1 |
| hsa_circ_0019606   | - | ENSG00000198408;      | CVB5_5Y2,Con_5Y1 |
| hsa_circ_0006610   | + | ENSG00000151553;      | CVB5_5Y2,Con_5Y1 |
| hsa_circ_0005767   | - | ENSG00000148484;      | CVB5_5Y2,Con_5Y1 |
| hsa_circ_0002478   | - | ENSG00000057608;      | CVB5_5Y2,Con_5Y1 |
| hsa_circ_0000240   | + | ENSG00000060339;      | CVB5_5Y2,Con_5Y1 |
| hsa_circ_0042986   | + | ENSG00000178691;      | CVB5_5Y2,Con_5Y1 |
| hsa_circ_0044647   | - | ENSG00000008294;      | CVB5_5Y2,Con_5Y1 |
| hsa_circ_0045219   | - | ENSG00000108588;      | CVB5_5Y2,Con_5Y1 |
| hsa_circ_0042009   | + | ENSG00000178921;      | CVB5_5Y2,Con_5Y1 |
| hsa_circ_0006836   | + | ENSG00000038532;      | CVB5_5Y2,Con_5Y1 |
| hsa_circ_0038054   | + | ENSG00000072864;      | CVB5_5Y2,Con_5Y1 |
| hsa_circ_0036586   | - | ENSG00000064726;      | CVB5_5Y2,Con_5Y1 |
| hsa_circ_0048466   | + | ENSG00000141905;      | CVB5_5Y2,Con_5Y1 |
| hsa_circ_0002558   | + | ENSG00000267216;ENSG0 | CVB5_5Y2,Con_5Y1 |
| hsa_circ_0008190   | + | ENSG00000101752;      | CVB5_5Y2,Con_5Y1 |
| hsa_circ_0062714   | - | ENSG00000183765;      | CVB5_5Y2,Con_5Y1 |
| hsa_circ_0061031   | + | ENSG00000149657;      | CVB5_5Y2,Con_5Y1 |
| hsa_circ_0061291   | + | ENSG00000155313;      | CVB5_5Y2,Con_5Y1 |
| hsa_circ_0081797   | - | ENSG00000164815;      | CVB5_5Y2,Con_5Y1 |
| hsa_circ_0078762   | + | ENSG00000130023;      | CVB5_5Y2,Con_5Y1 |
| hsa_circ_0073992   | + | ENSG00000113615;      | CVB5_5Y2,Con_5Y1 |
| hsa_circ_0071384   | + | ENSG00000109466;      | CVB5_5Y2,Con_5Y1 |
| hsa_circ_0004358   | - | ENSG00000132466;      | CVB5_5Y2,Con_5Y1 |
| hsa_circ_0070133   | + | ENSG00000138759;      | CVB5_5Y2,Con_5Y1 |
| hsa_circ_0007975   | + | ENSG00000197548;      | CVB5_5Y2,Con_5Y1 |
| hsa_circ_0003533   | - | ENSG00000160746;      | CVB5_5Y2,Con_5Y1 |
| hsa_circ_0003091   | - | ENSG00000114268;      | CVB5_5Y2,Con_5Y1 |
| hsa_circ_0003060   | - | ENSG00000172340;      | CVB5_5Y2,Con_5Y1 |
| hsa_circ_0004276   | - | ENSG00000172340;      | CVB5_5Y2,Con_5Y1 |
| hsa_circ_0002652   | - | ENSG00000115524;      | CVB5_5Y2,Con_5Y1 |
| hsa_circ_0003081   | + | ENSG00000168958;      | CVB5_5Y2,Con_5Y1 |
| hsa_circ_0054282   | + | ENSG00000057935;      | CVB5_5Y2,Con_5Y1 |
| hsa_circ_0005951   | + | ENSG00000162869;      | CVB5_5Y2,Con_5Y1 |
| hsa_circ_0015077   | - | ENSG00000143183;      | CVB5_5Y2,Con_5Y1 |
| hsa_circ_0006869   | - | ENSG00000078369;      | CVB5_5Y2,Con_5Y1 |
| hsa_circ_0007234   | + | ENSG00000082512;      | CVB5_5Y2,Con_5Y1 |
| hsa_circ_0010835   | + | ENSG00000004487;      | CVB5_5Y2,Con_5Y1 |
| hsa_circ_0004839   | - | ENSG00000116209;      | CVB5_5Y2,Con_5Y1 |
| hsa_circ_0088744   | - | ENSG00000148337;      | CVB5_5Y2,Con_5Y1 |
| hsa_circ_0086422   | + | ENSG00000044459;      | CVB5_5Y2,Con_5Y1 |
| hsa_circ_0087247   | + | ENSG00000197969;      | CVB5_5Y2,Con_5Y1 |
| novel_circ_0018676 | - | ENSG00000147255;      | CVB5_5Y2,Con_5Y1 |
| novel_circ_0002858 | + | n/a                   | CVB5_5Y2,Con_5Y1 |
| novel_circ_0001807 | + | ENSG00000075089;      | CVB5_5Y2,Con_5Y1 |
| novel_circ_0001851 | - | ENSG00000120837;      | CVB5_5Y2,Con_5Y1 |
| novel_circ_0002268 | + | ENSG00000111700;ENSG0 | CVB5_5Y2,Con_5Y1 |
| novel_circ_0002307 | + | ENSG00000004478;      | CVB5_5Y2,Con_5Y1 |
| novel_circ_0001310 | - | ENSG00000170959;      | CVB5_5Y2,Con_5Y1 |
| novel_circ_0001579 | + | ENSG00000110075;      | CVB5_5Y2,Con_5Y1 |
| novel_circ_0005486 | - | n/a                   | CVB5_5Y2,Con_5Y1 |
| novel_circ_0005213 | - | ENSG00000167522;      | CVB5_5Y2,Con_5Y1 |
| novel_circ_0004078 | + | ENSG00000174197;      | CVB5_5Y2,Con_5Y1 |
| novel_circ_0004560 | + | ENSG00000173575;      | CVB5_5Y2,Con_5Y1 |
| novel_circ_0003383 | - | ENSG00000129566;      | CVB5_5Y2,Con_5Y1 |
| novel_circ_0006740 | - | ENSG00000071564;      | CVB5_5Y2,Con_5Y1 |

|                    |   |                       |                   |
|--------------------|---|-----------------------|-------------------|
| novel_circ_0006384 | + | ENSG00000101596;      | CVB5_5Y2,Con_5Y1  |
| novel_circ_0009431 | + | ENSG00000286235;ENSG0 | CVB5_5Y2,Con_5Y1  |
| novel_circ_0009543 | + | ENSG00000166979;      | CVB5_5Y2,Con_5Y1  |
| novel_circ_0015183 | + | ENSG00000055211;      | CVB5_5Y2,Con_5Y1  |
| novel_circ_0015764 | - | ENSG00000112159;      | CVB5_5Y2,Con_5Y1  |
| novel_circ_0013299 | + | ENSG00000071205;      | CVB5_5Y2,Con_5Y1  |
| novel_circ_0013815 | + | ENSG00000138768;      | CVB5_5Y2,Con_5Y1  |
| novel_circ_0010909 | + | ENSG00000077044;      | CVB5_5Y2,Con_5Y1  |
| novel_circ_0007377 | - | ENSG00000163159;      | CVB5_5Y2,Con_5Y1  |
| novel_circ_0007536 | + | ENSG00000143179;      | CVB5_5Y2,Con_5Y1  |
| novel_circ_0017944 | - | ENSG00000136935;      | CVB5_5Y2,Con_5Y1  |
| novel_circ_0018471 | + | ENSG00000123975;      | CVB5_5Y2,Con_5Y1  |
| novel_circ_0017030 | - | ENSG00000129295;      | CVB5_5Y2,Con_5Y1  |
| novel_circ_0017253 | - | ENSG00000147419;      | CVB5_5Y2,Con_5Y1  |
| hsa_circ_0030347   | - | ENSG00000136100;      | CVB5_5Y2,Con_5Y1, |
| hsa_circ_0002513   | - | ENSG00000073921;      | CVB5_5Y2,Con_5Y1, |
| hsa_circ_0008393   | - | ENSG00000107554;      | CVB5_5Y2,Con_5Y1, |
| hsa_circ_0007882   | + | ENSG00000160551;      | CVB5_5Y2,Con_5Y1, |
| hsa_circ_0042952   | - | ENSG00000108651;      | CVB5_5Y2,Con_5Y1, |
| hsa_circ_0007248   | - | ENSG00000141698;      | CVB5_5Y2,Con_5Y1, |
| hsa_circ_0044016   | - | ENSG00000108840;      | CVB5_5Y2,Con_5Y1, |
| hsa_circ_0044646   | - | ENSG00000008294;      | CVB5_5Y2,Con_5Y1, |
| hsa_circ_0005652   | + | ENSG00000141198;      | CVB5_5Y2,Con_5Y1, |
| hsa_circ_0005582   | - | ENSG00000083093;      | CVB5_5Y2,Con_5Y1, |
| hsa_circ_0035296   | + | ENSG00000138594;      | CVB5_5Y2,Con_5Y1, |
| hsa_circ_0008683   | + | ENSG00000197102;      | CVB5_5Y2,Con_5Y1, |
| hsa_circ_0002369   | - | ENSG00000159082;      | CVB5_5Y2,Con_5Y1, |
| hsa_circ_0001736   | + | ENSG00000005483;      | CVB5_5Y2,Con_5Y1, |
| hsa_circ_0083142   | + | ENSG00000009335;      | CVB5_5Y2,Con_5Y1, |
| hsa_circ_0007172   | - | ENSG00000196821;      | CVB5_5Y2,Con_5Y1, |
| hsa_circ_0076078   | + | ENSG00000064999;      | CVB5_5Y2,Con_5Y1, |
| hsa_circ_0004990   | - | ENSG00000135317;ENSG0 | CVB5_5Y2,Con_5Y1, |
| hsa_circ_0001534   | - | ENSG00000031003;      | CVB5_5Y2,Con_5Y1, |
| hsa_circ_0003057   | - | ENSG00000154122;      | CVB5_5Y2,Con_5Y1, |
| hsa_circ_0070911   | + | ENSG00000164070;      | CVB5_5Y2,Con_5Y1, |
| hsa_circ_0071123   | + | ENSG00000071205;      | CVB5_5Y2,Con_5Y1, |
| hsa_circ_0006673   | + | ENSG00000154743;      | CVB5_5Y2,Con_5Y1, |
| hsa_circ_0067531   | - | ENSG00000051382;      | CVB5_5Y2,Con_5Y1, |
| hsa_circ_0067997   | + | ENSG00000075420;      | CVB5_5Y2,Con_5Y1, |
| hsa_circ_0008550   | - | ENSG00000078070;      | CVB5_5Y2,Con_5Y1, |
| hsa_circ_0068629   | - | ENSG00000072274;      | CVB5_5Y2,Con_5Y1, |
| hsa_circ_0005873   | + | ENSG00000186001;      | CVB5_5Y2,Con_5Y1, |
| hsa_circ_0001988   | + | ENSG00000163635;ENSG0 | CVB5_5Y2,Con_5Y1, |
| hsa_circ_0008465   | + | ENSG00000168137;      | CVB5_5Y2,Con_5Y1, |
| hsa_circ_0002795   | + | ENSG00000021574;      | CVB5_5Y2,Con_5Y1, |
| hsa_circ_0001011   | + | ENSG00000162924;      | CVB5_5Y2,Con_5Y1, |
| hsa_circ_0010064   | + | ENSG00000116786;      | CVB5_5Y2,Con_5Y1, |
| hsa_circ_0008857   | + | ENSG00000118217;      | CVB5_5Y2,Con_5Y1, |
| hsa_circ_0011159   | - | ENSG00000120656;      | CVB5_5Y2,Con_5Y1, |
| hsa_circ_0011555   | + | ENSG00000146463;      | CVB5_5Y2,Con_5Y1, |
| hsa_circ_0088511   | - | ENSG00000148200;      | CVB5_5Y2,Con_5Y1, |
| hsa_circ_0002976   | - | ENSG00000137073;      | CVB5_5Y2,Con_5Y1, |
| hsa_circ_0086729   | - | ENSG00000137073;      | CVB5_5Y2,Con_5Y1, |
| hsa_circ_0008613   | + | ENSG00000147854;      | CVB5_5Y2,Con_5Y1, |
| hsa_circ_0008075   | + | ENSG00000197969;      | CVB5_5Y2,Con_5Y1, |
| hsa_circ_0007800   | - | ENSG00000120875;      | CVB5_5Y2,Con_5Y1, |
| novel_circ_0018659 | - | ENSG00000125676;      | CVB5_5Y2,Con_5Y1, |
| novel_circ_0001509 | - | ENSG00000133315;      | CVB5_5Y2,Con_5Y1, |

|                    |   |                  |                   |
|--------------------|---|------------------|-------------------|
| novel_circ_0000129 | + | n/a              | CVB5_5Y2,Con_5Y1, |
| novel_circ_0005998 | + | ENSG00000171634; | CVB5_5Y2,Con_5Y1, |
| novel_circ_0004489 | + | ENSG00000259429; | CVB5_5Y2,Con_5Y1, |
| novel_circ_0003701 | + | ENSG00000033170; | CVB5_5Y2,Con_5Y1, |
| novel_circ_0006705 | - | ENSG00000105612; | CVB5_5Y2,Con_5Y1, |
| novel_circ_0009793 | + | ENSG00000159873; | CVB5_5Y2,Con_5Y1, |
| novel_circ_0016138 | + | ENSG00000184863; | CVB5_5Y2,Con_5Y1, |
| novel_circ_0015047 | + | ENSG00000146373; | CVB5_5Y2,Con_5Y1, |
| novel_circ_0014446 | + | ENSG00000127022; | CVB5_5Y2,Con_5Y1, |
| novel_circ_0014661 | + | ENSG00000153015; | CVB5_5Y2,Con_5Y1, |
| novel_circ_0013760 | + | ENSG00000174780; | CVB5_5Y2,Con_5Y1, |
| novel_circ_0012755 | - | ENSG00000173473; | CVB5_5Y2,Con_5Y1, |
| novel_circ_0011320 | + | ENSG00000171132; | CVB5_5Y2,Con_5Y1, |
| novel_circ_0011654 | - | ENSG00000068654; | CVB5_5Y2,Con_5Y1, |
| novel_circ_0007737 | + | ENSG00000157181; | CVB5_5Y2,Con_5Y1, |
| novel_circ_0008066 | - | ENSG00000143776; | CVB5_5Y2,Con_5Y1, |
| novel_circ_0018196 | - | ENSG00000120159; | CVB5_5Y2,Con_5Y1, |
| hsa_circ_0091103   | - | ENSG00000085224; | CVB5_5Y2,Con_5Y1, |
| hsa_circ_0031007   | - | ENSG00000139835; | CVB5_5Y2,Con_5Y1, |
| hsa_circ_0002473   | + | ENSG00000102580; | CVB5_5Y2,Con_5Y1, |
| hsa_circ_0005424   | + | ENSG00000198431; | CVB5_5Y2,Con_5Y1, |
| hsa_circ_0000438   | - | ENSG00000204842; | CVB5_5Y2,Con_5Y1, |
| hsa_circ_0018046   | - | ENSG00000169126; | CVB5_5Y2,Con_5Y1, |
| hsa_circ_0043297   | - | ENSG00000275066; | CVB5_5Y2,Con_5Y1, |
| hsa_circ_0005877   | - | ENSG00000131747; | CVB5_5Y2,Con_5Y1, |
| hsa_circ_0038074   | + | ENSG00000103222; | CVB5_5Y2,Con_5Y1, |
| hsa_circ_0040458   | - | ENSG00000090863; | CVB5_5Y2,Con_5Y1, |
| hsa_circ_0005220   | + | ENSG00000172530; | CVB5_5Y2,Con_5Y1, |
| hsa_circ_0003973   | + | ENSG00000166949; | CVB5_5Y2,Con_5Y1, |
| hsa_circ_0000542   | + | ENSG00000032219; | CVB5_5Y2,Con_5Y1, |
| hsa_circ_0032821   | - | ENSG00000100629; | CVB5_5Y2,Con_5Y1, |
| hsa_circ_0004786   | + | ENSG00000125753; | CVB5_5Y2,Con_5Y1, |
| hsa_circ_0006332   | + | ENSG00000101057; | CVB5_5Y2,Con_5Y1, |
| hsa_circ_0081822   | + | ENSG00000005483; | CVB5_5Y2,Con_5Y1, |
| hsa_circ_0002494   | - | ENSG00000157800; | CVB5_5Y2,Con_5Y1, |
| hsa_circ_0083226   | + | ENSG00000126870; | CVB5_5Y2,Con_5Y1, |
| hsa_circ_0076560   | - | ENSG00000124571; | CVB5_5Y2,Con_5Y1, |
| hsa_circ_0006499   | - | ENSG00000145723; | CVB5_5Y2,Con_5Y1, |
| hsa_circ_0007773   | - | ENSG00000055147; | CVB5_5Y2,Con_5Y1, |
| hsa_circ_0006894   | - | ENSG00000120137; | CVB5_5Y2,Con_5Y1, |
| hsa_circ_0008164   | - | ENSG00000132842; | CVB5_5Y2,Con_5Y1, |
| hsa_circ_0068956   | - | ENSG00000087269; | CVB5_5Y2,Con_5Y1, |
| hsa_circ_0007820   | + | ENSG00000065882; | CVB5_5Y2,Con_5Y1, |
| hsa_circ_0007143   | + | ENSG00000144824; | CVB5_5Y2,Con_5Y1, |
| hsa_circ_0053378   | + | ENSG00000172954; | CVB5_5Y2,Con_5Y1, |
| hsa_circ_0014088   | + | ENSG00000143363; | CVB5_5Y2,Con_5Y1, |
| hsa_circ_0000018   | + | ENSG00000116138; | CVB5_5Y2,Con_5Y1, |
| hsa_circ_0004777   | + | ENSG00000143842; | CVB5_5Y2,Con_5Y1, |
| hsa_circ_0001958   | - | ENSG00000135749; | CVB5_5Y2,Con_5Y1, |
| hsa_circ_0004109   | - | ENSG00000106771; | CVB5_5Y2,Con_5Y1, |
| hsa_circ_0088072   | - | ENSG00000119314; | CVB5_5Y2,Con_5Y1, |
| novel_circ_0001025 | + | ENSG00000133805; | CVB5_5Y2,Con_5Y1, |
| novel_circ_0000408 | - | ENSG00000078114; | CVB5_5Y2,Con_5Y1, |
| novel_circ_0004472 | + | ENSG00000041357; | CVB5_5Y2,Con_5Y1, |
| novel_circ_0015867 | - | ENSG00000164815; | CVB5_5Y2,Con_5Y1, |
| novel_circ_0015924 | + | ENSG00000106443; | CVB5_5Y2,Con_5Y1, |
| novel_circ_0014126 | + | ENSG00000170606; | CVB5_5Y2,Con_5Y1, |
| novel_circ_0014497 | - | ENSG00000056097; | CVB5_5Y2,Con_5Y1, |

|                    |   |                       |                   |
|--------------------|---|-----------------------|-------------------|
| novel_circ_0014751 | - | ENSG00000164347;      | CVB5_5Y2,Con_5Y1, |
| novel_circ_0010265 | + | ENSG00000080345;      | CVB5_5Y2,Con_5Y1, |
| novel_circ_0010368 | - | ENSG00000198648;      | CVB5_5Y2,Con_5Y1, |
| novel_circ_0007806 | - | ENSG00000118193;      | CVB5_5Y2,Con_5Y1, |
| novel_circ_0008088 | + | ENSG00000168118;      | CVB5_5Y2,Con_5Y1, |
| novel_circ_0016866 | - | ENSG00000253649;      | CVB5_5Y2,Con_5Y1, |
| novel_circ_0017485 | + | ENSG00000147316;      | CVB5_5Y2,Con_5Y1, |
| hsa_circ_0000469   | + | ENSG00000152520;      | CVB5_5Y2,Con_5Y1, |
| hsa_circ_0029311   | - | ENSG00000196498;      | CVB5_5Y2,Con_5Y1, |
| hsa_circ_0000409   | - | ENSG00000198056;      | CVB5_5Y2,Con_5Y1, |
| hsa_circ_0002539   | - | ENSG00000179912;ENSG0 | CVB5_5Y2,Con_5Y1, |
| hsa_circ_0009168   | - | ENSG00000108588;      | CVB5_5Y2,Con_5Y1, |
| hsa_circ_0000721   | + | ENSG00000197943;      | CVB5_5Y2,Con_5Y1, |
| hsa_circ_0035289   | + | ENSG00000138594;      | CVB5_5Y2,Con_5Y1, |
| hsa_circ_0031417   | + | ENSG00000092108;      | CVB5_5Y2,Con_5Y1, |
| hsa_circ_0032511   | + | ENSG00000100767;      | CVB5_5Y2,Con_5Y1, |
| hsa_circ_0005030   | - | ENSG00000119682;      | CVB5_5Y2,Con_5Y1, |
| hsa_circ_0049072   | + | ENSG00000099783;      | CVB5_5Y2,Con_5Y1, |
| hsa_circ_0060219   | - | ENSG00000149639;      | CVB5_5Y2,Con_5Y1, |
| hsa_circ_0061726   | - | ENSG00000185658;      | CVB5_5Y2,Con_5Y1, |
| hsa_circ_0004381   | + | ENSG00000049618;      | CVB5_5Y2,Con_5Y1, |
| hsa_circ_0005608   | + | ENSG00000043143;      | CVB5_5Y2,Con_5Y1, |
| hsa_circ_0074158   | + | ENSG00000044115;      | CVB5_5Y2,Con_5Y1, |
| hsa_circ_0073434   | + | ENSG00000164292;      | CVB5_5Y2,Con_5Y1, |
| hsa_circ_0008757   | + | ENSG00000138768;      | CVB5_5Y2,Con_5Y1, |
| hsa_circ_0006866   | - | ENSG00000145332;      | CVB5_5Y2,Con_5Y1, |
| hsa_circ_0008649   | - | ENSG00000167103;      | CVB5_5Y2,Con_5Y1, |
| hsa_circ_0085278   | - | ENSG00000155096;      | CVB5_5Y2,Con_5Y1, |
| novel_circ_0002656 | - | ENSG00000133858;      | CVB5_5Y2,Con_5Y1, |
| novel_circ_0001215 | + | ENSG00000084234;      | CVB5_5Y2,Con_5Y1, |
| novel_circ_0000041 | - | ENSG00000198408;      | CVB5_5Y2,Con_5Y1, |
| novel_circ_0005112 | - | ENSG00000153774;      | CVB5_5Y2,Con_5Y1, |
| novel_circ_0014005 | - | ENSG00000129595;      | CVB5_5Y2,Con_5Y1, |
| novel_circ_0014364 | + | ENSG00000113327;      | CVB5_5Y2,Con_5Y1, |
| novel_circ_0012569 | - | ENSG00000113851;      | CVB5_5Y2,Con_5Y1, |
| novel_circ_0012716 | - | ENSG00000163814;      | CVB5_5Y2,Con_5Y1, |
| novel_circ_0016980 | + | ENSG00000156831;      | CVB5_5Y2,Con_5Y1, |
| hsa_circ_0005816   | + | ENSG00000239407;      | CVB5_5Y2,Con_5Y2  |
| hsa_circ_0008775   | + | ENSG00000028203;      | CVB5_5Y2,Con_5Y2  |
| hsa_circ_0003712   | - | ENSG00000148950;      | CVB5_5Y2,Con_5Y2  |
| hsa_circ_0005793   | + | ENSG00000173715;      | CVB5_5Y2,Con_5Y2  |
| hsa_circ_0024032   | - | ENSG00000020922;      | CVB5_5Y2,Con_5Y2  |
| hsa_circ_0003499   | + | ENSG00000150760;      | CVB5_5Y2,Con_5Y2  |
| hsa_circ_0002118   | + | ENSG00000108021;      | CVB5_5Y2,Con_5Y2  |
| hsa_circ_0043157   | - | ENSG00000278259;      | CVB5_5Y2,Con_5Y2  |
| hsa_circ_0006692   | - | n/a                   | CVB5_5Y2,Con_5Y2  |
| hsa_circ_0008805   | + | ENSG00000275832;      | CVB5_5Y2,Con_5Y2  |
| hsa_circ_0043528   | + | ENSG00000131759;      | CVB5_5Y2,Con_5Y2  |
| hsa_circ_0004090   | - | ENSG00000108395;      | CVB5_5Y2,Con_5Y2  |
| hsa_circ_0008480   | + | ENSG00000138834;      | CVB5_5Y2,Con_5Y2  |
| hsa_circ_0038376   | + | ENSG00000174628;      | CVB5_5Y2,Con_5Y2  |
| hsa_circ_0040908   | + | ENSG00000176715;      | CVB5_5Y2,Con_5Y2  |
| hsa_circ_0035828   | - | ENSG00000259316;ENSG0 | CVB5_5Y2,Con_5Y2  |
| hsa_circ_0037010   | + | ENSG00000140563;      | CVB5_5Y2,Con_5Y2  |
| hsa_circ_0049207   | - | ENSG00000130816;      | CVB5_5Y2,Con_5Y2  |
| hsa_circ_0046968   | + | ENSG00000141391;      | CVB5_5Y2,Con_5Y2  |
| hsa_circ_0047678   | - | ENSG00000167306;      | CVB5_5Y2,Con_5Y2  |
| hsa_circ_0004128   | - | ENSG00000183765;      | CVB5_5Y2,Con_5Y2  |

|                    |   |                  |                  |
|--------------------|---|------------------|------------------|
| hsa_circ_0062713   | - | ENSG00000183765; | CVB5_5Y2,Con_5Y2 |
| hsa_circ_0003723   | - | ENSG00000100401; | CVB5_5Y2,Con_5Y2 |
| hsa_circ_0004359   | - | ENSG00000124177; | CVB5_5Y2,Con_5Y2 |
| hsa_circ_0008452   | - | ENSG00000185658; | CVB5_5Y2,Con_5Y2 |
| hsa_circ_0001197   | - | ENSG00000160193; | CVB5_5Y2,Con_5Y2 |
| hsa_circ_0006887   | - | ENSG00000146376; | CVB5_5Y2,Con_5Y2 |
| hsa_circ_0006305   | + | ENSG00000049618; | CVB5_5Y2,Con_5Y2 |
| hsa_circ_0003042   | + | ENSG00000137275; | CVB5_5Y2,Con_5Y2 |
| hsa_circ_0008801   | + | ENSG00000137161; | CVB5_5Y2,Con_5Y2 |
| hsa_circ_0004894   | - | ENSG00000031003; | CVB5_5Y2,Con_5Y2 |
| hsa_circ_0074082   | - | ENSG00000031003; | CVB5_5Y2,Con_5Y2 |
| hsa_circ_0073052   | + | ENSG00000122008; | CVB5_5Y2,Con_5Y2 |
| hsa_circ_0070939   | + | ENSG00000138709; | CVB5_5Y2,Con_5Y2 |
| hsa_circ_0006213   | + | ENSG00000004534; | CVB5_5Y2,Con_5Y2 |
| hsa_circ_0009020   | - | ENSG00000186522; | CVB5_5Y2,Con_5Y2 |
| hsa_circ_0056262   | + | ENSG00000088179; | CVB5_5Y2,Con_5Y2 |
| hsa_circ_0004442   | - | ENSG00000198586; | CVB5_5Y2,Con_5Y2 |
| hsa_circ_0007529   | + | ENSG00000115827; | CVB5_5Y2,Con_5Y2 |
| hsa_circ_0058710   | + | ENSG00000135930; | CVB5_5Y2,Con_5Y2 |
| hsa_circ_0053063   | - | ENSG00000084754; | CVB5_5Y2,Con_5Y2 |
| hsa_circ_0054474   | + | ENSG00000116062; | CVB5_5Y2,Con_5Y2 |
| hsa_circ_0054802   | - | ENSG00000115464; | CVB5_5Y2,Con_5Y2 |
| hsa_circ_0055161   | - | ENSG00000003137; | CVB5_5Y2,Con_5Y2 |
| hsa_circ_0009248   | - | ENSG00000160087; | CVB5_5Y2,Con_5Y2 |
| hsa_circ_0004861   | + | ENSG00000116731; | CVB5_5Y2,Con_5Y2 |
| hsa_circ_0008653   | + | ENSG00000116199; | CVB5_5Y2,Con_5Y2 |
| hsa_circ_0000190   | + | ENSG00000143771; | CVB5_5Y2,Con_5Y2 |
| hsa_circ_0000192   | + | ENSG00000143641; | CVB5_5Y2,Con_5Y2 |
| hsa_circ_0000053   | - | ENSG00000196182; | CVB5_5Y2,Con_5Y2 |
| hsa_circ_0089720   | + | ENSG00000181090; | CVB5_5Y2,Con_5Y2 |
| hsa_circ_0008367   | - | ENSG00000196305; | CVB5_5Y2,Con_5Y2 |
| hsa_circ_0085714   | - | ENSG00000123908; | CVB5_5Y2,Con_5Y2 |
| hsa_circ_0084119   | + | ENSG00000078668; | CVB5_5Y2,Con_5Y2 |
| novel_circ_0018696 | - | ENSG00000213468; | CVB5_5Y2,Con_5Y2 |
| novel_circ_0001846 | - | ENSG00000111696; | CVB5_5Y2,Con_5Y2 |
| novel_circ_0002179 | - | ENSG00000196498; | CVB5_5Y2,Con_5Y2 |
| novel_circ_0002186 | - | ENSG00000196498; | CVB5_5Y2,Con_5Y2 |
| novel_circ_0002426 | - | ENSG00000111371; | CVB5_5Y2,Con_5Y2 |
| novel_circ_0000020 | + | ENSG00000107815; | CVB5_5Y2,Con_5Y2 |
| novel_circ_0000251 | - | ENSG00000107669; | CVB5_5Y2,Con_5Y2 |
| novel_circ_0000673 | + | ENSG00000165476; | CVB5_5Y2,Con_5Y2 |
| novel_circ_0000774 | - | ENSG00000122884; | CVB5_5Y2,Con_5Y2 |
| novel_circ_0000945 | + | ENSG00000119969; | CVB5_5Y2,Con_5Y2 |
| novel_circ_0000989 | - | ENSG00000107554; | CVB5_5Y2,Con_5Y2 |
| novel_circ_0005550 | - | ENSG00000008838; | CVB5_5Y2,Con_5Y2 |
| novel_circ_0005698 | + | ENSG00000198933; | CVB5_5Y2,Con_5Y2 |
| novel_circ_0006098 | - | ENSG00000055483; | CVB5_5Y2,Con_5Y2 |
| novel_circ_0006169 | - | ENSG00000141551; | CVB5_5Y2,Con_5Y2 |
| novel_circ_0004652 | - | ENSG00000133393; | CVB5_5Y2,Con_5Y2 |
| novel_circ_0005047 | + | ENSG00000189091; | CVB5_5Y2,Con_5Y2 |
| novel_circ_0005109 | + | ENSG00000186187; | CVB5_5Y2,Con_5Y2 |
| novel_circ_0004083 | + | ENSG00000159433; | CVB5_5Y2,Con_5Y2 |
| novel_circ_0004351 | + | ENSG00000033800; | CVB5_5Y2,Con_5Y2 |
| novel_circ_0003773 | + | ENSG00000100767; | CVB5_5Y2,Con_5Y2 |
| novel_circ_0007111 | + | ENSG00000160633; | CVB5_5Y2,Con_5Y2 |
| novel_circ_0006411 | + | ENSG00000134759; | CVB5_5Y2,Con_5Y2 |
| novel_circ_0009737 | + | ENSG00000099991; | CVB5_5Y2,Con_5Y2 |
| novel_circ_0009284 | + | ENSG00000125779; | CVB5_5Y2,Con_5Y2 |

|                    |   |                       |                   |
|--------------------|---|-----------------------|-------------------|
| novel_circ_0015907 | - | ENSG00000146776;      | CVB5_5Y2,Con_5Y2  |
| novel_circ_0015961 | - | ENSG00000048405;      | CVB5_5Y2,Con_5Y2  |
| novel_circ_0016481 | + | ENSG00000106305;      | CVB5_5Y2,Con_5Y2  |
| novel_circ_0015009 | - | ENSG00000153975;      | CVB5_5Y2,Con_5Y2  |
| novel_circ_0015389 | - | ENSG00000172197;      | CVB5_5Y2,Con_5Y2  |
| novel_circ_0014151 | + | ENSG00000145833;      | CVB5_5Y2,Con_5Y2  |
| novel_circ_0013417 | - | ENSG00000137601;      | CVB5_5Y2,Con_5Y2  |
| novel_circ_0013517 | + | ENSG00000248515;      | CVB5_5Y2,Con_5Y2  |
| novel_circ_0013697 | - | ENSG00000170448;      | CVB5_5Y2,Con_5Y2  |
| novel_circ_0012810 | + | ENSG00000177479;      | CVB5_5Y2,Con_5Y2  |
| novel_circ_0012910 | + | n/a                   | CVB5_5Y2,Con_5Y2  |
| novel_circ_0012998 | - | n/a                   | CVB5_5Y2,Con_5Y2  |
| novel_circ_0010582 | - | ENSG00000197121;      | CVB5_5Y2,Con_5Y2  |
| novel_circ_0011058 | + | ENSG00000163811;      | CVB5_5Y2,Con_5Y2  |
| novel_circ_0007229 | + | n/a                   | CVB5_5Y2,Con_5Y2  |
| novel_circ_0007800 | + | ENSG00000169914;      | CVB5_5Y2,Con_5Y2  |
| novel_circ_0008250 | - | ENSG00000153187;      | CVB5_5Y2,Con_5Y2  |
| novel_circ_0008347 | - | ENSG00000116350;      | CVB5_5Y2,Con_5Y2  |
| novel_circ_0008535 | + | ENSG00000066135;ENSG0 | CVB5_5Y2,Con_5Y2  |
| novel_circ_0017992 | + | ENSG00000167123;      | CVB5_5Y2,Con_5Y2  |
| novel_circ_0017251 | + | ENSG00000120899;      | CVB5_5Y2,Con_5Y2  |
| hsa_circ_0004408   | + | ENSG00000185896;      | CVB5_5Y2,Con_5Y2, |
| hsa_circ_0030707   | - | ENSG00000102572;      | CVB5_5Y2,Con_5Y2, |
| hsa_circ_0034657   | - | ENSG00000128908;      | CVB5_5Y2,Con_5Y2, |
| hsa_circ_0034989   | - | ENSG00000067369;      | CVB5_5Y2,Con_5Y2, |
| hsa_circ_0000645   | - | ENSG00000117899;      | CVB5_5Y2,Con_5Y2, |
| hsa_circ_0000659   | + | ENSG00000140563;      | CVB5_5Y2,Con_5Y2, |
| hsa_circ_0006831   | - | ENSG00000198554;      | CVB5_5Y2,Con_5Y2, |
| hsa_circ_0007163   | + | ENSG00000033170;      | CVB5_5Y2,Con_5Y2, |
| hsa_circ_0032526   | + | ENSG00000258653;ENSG0 | CVB5_5Y2,Con_5Y2, |
| hsa_circ_0005973   | + | ENSG00000127616;      | CVB5_5Y2,Con_5Y2, |
| hsa_circ_0062545   | - | ENSG00000228315;      | CVB5_5Y2,Con_5Y2, |
| hsa_circ_0061938   | + | ENSG00000160218;      | CVB5_5Y2,Con_5Y2, |
| hsa_circ_0007017   | - | ENSG00000055609;      | CVB5_5Y2,Con_5Y2, |
| hsa_circ_0001714   | - | ENSG00000009954;      | CVB5_5Y2,Con_5Y2, |
| hsa_circ_0007842   | - | ENSG00000049541;      | CVB5_5Y2,Con_5Y2, |
| hsa_circ_0077496   | - | ENSG00000112249;      | CVB5_5Y2,Con_5Y2, |
| hsa_circ_0001542   | + | ENSG00000131503;ENSG0 | CVB5_5Y2,Con_5Y2, |
| hsa_circ_0073486   | - | ENSG00000153922;      | CVB5_5Y2,Con_5Y2, |
| hsa_circ_0006977   | - | ENSG00000138757;      | CVB5_5Y2,Con_5Y2, |
| hsa_circ_0068129   | + | ENSG00000114416;      | CVB5_5Y2,Con_5Y2, |
| hsa_circ_0003927   | - | ENSG00000047849;      | CVB5_5Y2,Con_5Y2, |
| hsa_circ_0066147   | - | ENSG00000163935;      | CVB5_5Y2,Con_5Y2, |
| hsa_circ_0058809   | + | ENSG00000157985;      | CVB5_5Y2,Con_5Y2, |
| hsa_circ_0008161   | - | ENSG00000116539;      | CVB5_5Y2,Con_5Y2, |
| hsa_circ_0005814   | + | ENSG00000074964;      | CVB5_5Y2,Con_5Y2, |
| hsa_circ_0002008   | + | ENSG00000065243;      | CVB5_5Y2,Con_5Y2, |
| hsa_circ_0007592   | + | ENSG00000120158;      | CVB5_5Y2,Con_5Y2, |
| hsa_circ_0006928   | - | ENSG00000165138;      | CVB5_5Y2,Con_5Y2, |
| novel_circ_0001856 | - | ENSG00000255641;      | CVB5_5Y2,Con_5Y2, |
| novel_circ_0002628 | + | ENSG00000135679;      | CVB5_5Y2,Con_5Y2, |
| novel_circ_0006519 | - | ENSG00000134440;      | CVB5_5Y2,Con_5Y2, |
| novel_circ_0009944 | + | ENSG00000241484;ENSG0 | CVB5_5Y2,Con_5Y2, |
| novel_circ_0015107 | - | ENSG00000118514;      | CVB5_5Y2,Con_5Y2, |
| novel_circ_0015384 | - | ENSG00000124795;      | CVB5_5Y2,Con_5Y2, |
| novel_circ_0011369 | - | ENSG00000068878;      | CVB5_5Y2,Con_5Y2, |
| novel_circ_0011372 | + | ENSG00000214595;      | CVB5_5Y2,Con_5Y2, |
| novel_circ_0008182 | + | ENSG00000284770;ENSG0 | CVB5_5Y2,Con_5Y2, |

|                    |   |                       |                   |
|--------------------|---|-----------------------|-------------------|
| novel_circ_0018586 | + | ENSG00000136937;      | CVB5_5Y2,Con_5Y2, |
| hsa_circ_0029762   | - | ENSG00000102699;      | CVB5_5Y2,Con_5Y3  |
| hsa_circ_0029441   | + | ENSG00000061936;      | CVB5_5Y2,Con_5Y3  |
| hsa_circ_0025128   | - | ENSG00000067182;      | CVB5_5Y2,Con_5Y3  |
| hsa_circ_0000360   | - | ENSG00000110367;      | CVB5_5Y2,Con_5Y3  |
| hsa_circ_0002955   | + | ENSG00000196914;      | CVB5_5Y2,Con_5Y3  |
| hsa_circ_0022631   | + | ENSG00000168439;      | CVB5_5Y2,Con_5Y3  |
| hsa_circ_0002417   | + | ENSG00000110075;      | CVB5_5Y2,Con_5Y3  |
| hsa_circ_0023558   | - | ENSG00000168014;      | CVB5_5Y2,Con_5Y3  |
| hsa_circ_0020251   | - | ENSG00000107669;      | CVB5_5Y2,Con_5Y3  |
| hsa_circ_0044158   | - | ENSG00000161714;      | CVB5_5Y2,Con_5Y3  |
| hsa_circ_0002809   | - | ENSG00000108395;      | CVB5_5Y2,Con_5Y3  |
| hsa_circ_0003864   | + | ENSG00000013364;      | CVB5_5Y2,Con_5Y3  |
| hsa_circ_0040738   | + | ENSG00000131149;      | CVB5_5Y2,Con_5Y3  |
| hsa_circ_0032190   | + | ENSG00000100714;      | CVB5_5Y2,Con_5Y3  |
| hsa_circ_0050338   | + | ENSG00000105176;      | CVB5_5Y2,Con_5Y3  |
| hsa_circ_0063452   | - | ENSG00000196588;      | CVB5_5Y2,Con_5Y3  |
| hsa_circ_0061208   | + | ENSG00000101161;      | CVB5_5Y2,Con_5Y3  |
| hsa_circ_0006087   | + | ENSG00000091009;ENSG0 | CVB5_5Y2,Con_5Y3  |
| hsa_circ_0073102   | - | ENSG00000132842;      | CVB5_5Y2,Con_5Y3  |
| hsa_circ_0068960   | - | ENSG00000087269;      | CVB5_5Y2,Con_5Y3  |
| hsa_circ_0069740   | + | ENSG00000145216;      | CVB5_5Y2,Con_5Y3  |
| hsa_circ_0069086   | + | ENSG00000013288;      | CVB5_5Y2,Con_5Y3  |
| hsa_circ_0005830   | - | ENSG00000178950;      | CVB5_5Y2,Con_5Y3  |
| hsa_circ_0067222   | - | ENSG00000163902;      | CVB5_5Y2,Con_5Y3  |
| hsa_circ_0058779   | - | ENSG00000085982;      | CVB5_5Y2,Con_5Y3  |
| hsa_circ_0055190   | - | ENSG00000144036;      | CVB5_5Y2,Con_5Y3  |
| hsa_circ_0004095   | + | ENSG00000197312;      | CVB5_5Y2,Con_5Y3  |
| hsa_circ_0006578   | - | ENSG00000196182;      | CVB5_5Y2,Con_5Y3  |
| hsa_circ_0088680   | - | ENSG00000136830;      | CVB5_5Y2,Con_5Y3  |
| hsa_circ_0006088   | + | ENSG00000197694;      | CVB5_5Y2,Con_5Y3  |
| hsa_circ_0084929   | + | ENSG00000104413;      | CVB5_5Y2,Con_5Y3  |
| novel_circ_0018747 | + | ENSG00000071859;      | CVB5_5Y2,Con_5Y3  |
| novel_circ_0000178 | - | ENSG00000151893;      | CVB5_5Y2,Con_5Y3  |
| novel_circ_0000465 | - | ENSG00000169126;      | CVB5_5Y2,Con_5Y3  |
| novel_circ_0005606 | - | ENSG00000132388;      | CVB5_5Y2,Con_5Y3  |
| novel_circ_0005770 | - | ENSG00000005100;      | CVB5_5Y2,Con_5Y3  |
| novel_circ_0005115 | - | ENSG00000153774;      | CVB5_5Y2,Con_5Y3  |
| novel_circ_0005144 | - | ENSG00000153786;      | CVB5_5Y2,Con_5Y3  |
| novel_circ_0004006 | - | ENSG00000166912;      | CVB5_5Y2,Con_5Y3  |
| novel_circ_0006942 | + | ENSG00000077312;      | CVB5_5Y2,Con_5Y3  |
| novel_circ_0007133 | - | ENSG00000070423;      | CVB5_5Y2,Con_5Y3  |
| novel_circ_0006377 | + | ENSG00000101596;      | CVB5_5Y2,Con_5Y3  |
| novel_circ_0014935 | - | ENSG00000112249;      | CVB5_5Y2,Con_5Y3  |
| novel_circ_0015777 | + | ENSG00000118412;      | CVB5_5Y2,Con_5Y3  |
| novel_circ_0014862 | - | ENSG00000164180;      | CVB5_5Y2,Con_5Y3  |
| novel_circ_0013257 | - | ENSG00000145391;      | CVB5_5Y2,Con_5Y3  |
| novel_circ_0013704 | + | ENSG00000109171;      | CVB5_5Y2,Con_5Y3  |
| novel_circ_0012803 | - | ENSG00000114268;      | CVB5_5Y2,Con_5Y3  |
| novel_circ_0010389 | - | ENSG00000152253;      | CVB5_5Y2,Con_5Y3  |
| novel_circ_0010590 | + | ENSG00000270757;ENSG0 | CVB5_5Y2,Con_5Y3  |
| novel_circ_0010772 | + | n/a                   | CVB5_5Y2,Con_5Y3  |
| novel_circ_0007823 | + | ENSG00000198700;      | CVB5_5Y2,Con_5Y3  |
| novel_circ_0008379 | - | ENSG00000184007;      | CVB5_5Y2,Con_5Y3  |
| novel_circ_0008831 | + | n/a                   | CVB5_5Y2,Con_5Y3  |
| novel_circ_0016898 | - | ENSG00000147677;      | CVB5_5Y2,Con_5Y3  |
| novel_circ_0016927 | - | ENSG00000136986;      | CVB5_5Y2,Con_5Y3  |
| hsa_circ_0029934   | - | ENSG00000244754;      | CVB5_5Y2, CVB5_5Y |



|                    |   |                        |                   |
|--------------------|---|------------------------|-------------------|
| hsa_circ_0003170   | - | ENSG00000102572;       | CVB5_5Y2, CVB5_5Y |
| hsa_circ_0028339   | - | ENSG00000111300;       | CVB5_5Y2, CVB5_5Y |
| hsa_circ_0005186   | + | ENSG00000061936;       | CVB5_5Y2, CVB5_5Y |
| hsa_circ_0005450   | + | ENSG00000067798;       | CVB5_5Y2, CVB5_5Y |
| hsa_circ_0024230   | + | ENSG00000149311;       | CVB5_5Y2, CVB5_5Y |
| hsa_circ_0020340   | + | ENSG00000019995;       | CVB5_5Y2, CVB5_5Y |
| hsa_circ_0018937   | - | ENSG00000151208;       | CVB5_5Y2, CVB5_5Y |
| hsa_circ_0042799   | - | ENSG00000141298;       | CVB5_5Y2, CVB5_5Y |
| hsa_circ_0006860   | - | ENSG00000278259;       | CVB5_5Y2, CVB5_5Y |
| hsa_circ_0045881   | + | ENSG00000183077;       | CVB5_5Y2, CVB5_5Y |
| hsa_circ_0005429   | + | ENSG00000072415;       | CVB5_5Y2, CVB5_5Y |
| hsa_circ_0032377   | - | ENSG00000006432;       | CVB5_5Y2, CVB5_5Y |
| hsa_circ_0032379   | - | ENSG00000006432;       | CVB5_5Y2, CVB5_5Y |
| hsa_circ_0005007   | + | ENSG00000090060;       | CVB5_5Y2, CVB5_5Y |
| hsa_circ_0005679   | - | ENSG00000242247;       | CVB5_5Y2, CVB5_5Y |
| hsa_circ_0060236   | - | ENSG00000080839;       | CVB5_5Y2, CVB5_5Y |
| hsa_circ_0061746   | - | ENSG00000185658;       | CVB5_5Y2, CVB5_5Y |
| hsa_circ_0081849   | - | ENSG00000091127;       | CVB5_5Y2, CVB5_5Y |
| hsa_circ_0008612   | + | ENSG00000106144;       | CVB5_5Y2, CVB5_5Y |
| hsa_circ_0003249   | - | ENSG00000120256; ENSG0 | CVB5_5Y2, CVB5_5Y |
| hsa_circ_0002165   | - | ENSG00000096063;       | CVB5_5Y2, CVB5_5Y |
| hsa_circ_0073527   | + | ENSG00000151422;       | CVB5_5Y2, CVB5_5Y |
| hsa_circ_0006472   | - | ENSG00000164099;       | CVB5_5Y2, CVB5_5Y |
| hsa_circ_0008910   | - | ENSG00000129187;       | CVB5_5Y2, CVB5_5Y |
| hsa_circ_0008394   | + | ENSG00000113845;       | CVB5_5Y2, CVB5_5Y |
| hsa_circ_0001361   | + | ENSG00000075420;       | CVB5_5Y2, CVB5_5Y |
| hsa_circ_0065269   | - | ENSG00000173473;       | CVB5_5Y2, CVB5_5Y |
| hsa_circ_0056473   | + | ENSG00000136002;       | CVB5_5Y2, CVB5_5Y |
| hsa_circ_0004642   | - | ENSG00000055917;       | CVB5_5Y2, CVB5_5Y |
| hsa_circ_0004554   | - | ENSG00000153827;       | CVB5_5Y2, CVB5_5Y |
| hsa_circ_0000996   | + | ENSG00000143919;       | CVB5_5Y2, CVB5_5Y |
| hsa_circ_0003435   | + | ENSG00000126070;       | CVB5_5Y2, CVB5_5Y |
| hsa_circ_0005157   | + | ENSG00000171793;       | CVB5_5Y2, CVB5_5Y |
| hsa_circ_0088281   | - | ENSG00000136861;       | CVB5_5Y2, CVB5_5Y |
| hsa_circ_0088389   | - | ENSG00000056586;       | CVB5_5Y2, CVB5_5Y |
| novel_circ_0002133 | - | ENSG00000280138;       | CVB5_5Y2, CVB5_5Y |
| novel_circ_0001692 | + | ENSG00000165490;       | CVB5_5Y2, CVB5_5Y |
| novel_circ_0000255 | + | ENSG00000151465;       | CVB5_5Y2, CVB5_5Y |
| novel_circ_0000492 | - | ENSG00000107951;       | CVB5_5Y2, CVB5_5Y |
| novel_circ_0005564 | - | ENSG00000131746;       | CVB5_5Y2, CVB5_5Y |
| novel_circ_0005686 | + | ENSG00000141279;       | CVB5_5Y2, CVB5_5Y |
| novel_circ_0005886 | - | ENSG00000136492;       | CVB5_5Y2, CVB5_5Y |
| novel_circ_0004789 | - | ENSG00000169180;       | CVB5_5Y2, CVB5_5Y |
| novel_circ_0005185 | + | ENSG00000158545;       | CVB5_5Y2, CVB5_5Y |
| novel_circ_0006288 | + | ENSG00000101654;       | CVB5_5Y2, CVB5_5Y |
| novel_circ_0006301 | - | ENSG00000141446;       | CVB5_5Y2, CVB5_5Y |
| novel_circ_0015105 | + | ENSG00000028839;       | CVB5_5Y2, CVB5_5Y |
| novel_circ_0014179 | - | ENSG00000031003;       | CVB5_5Y2, CVB5_5Y |
| novel_circ_0012681 | - | ENSG00000168038;       | CVB5_5Y2, CVB5_5Y |
| novel_circ_0010400 | + | ENSG00000138398;       | CVB5_5Y2, CVB5_5Y |
| novel_circ_0010799 | + | ENSG00000236451;       | CVB5_5Y2, CVB5_5Y |
| novel_circ_0007929 | + | ENSG00000136643;       | CVB5_5Y2, CVB5_5Y |
| novel_circ_0016970 | + | ENSG00000180938;       | CVB5_5Y2, CVB5_5Y |
| novel_circ_0017188 | + | ENSG00000078674;       | CVB5_5Y2, CVB5_5Y |
| novel_circ_0017231 | + | ENSG00000246582;       | CVB5_5Y2, CVB5_5Y |
| novel_circ_0017462 | + | ENSG00000171316;       | CVB5_5Y2, CVB5_5Y |
| hsa_circ_0005574   | - | ENSG00000147010;       | CVB5_5Y2, CVB5_5Y |
| hsa_circ_0025909   | + | ENSG00000134283;       | CVB5_5Y2, CVB5_5Y |

|                    |   |                        |                   |
|--------------------|---|------------------------|-------------------|
| hsa_circ_0019658   | - | ENSG00000120029;       | CVB5_5Y2, CVB5_5Y |
| hsa_circ_0006408   | - | ENSG00000170759;       | CVB5_5Y2, CVB5_5Y |
| hsa_circ_0003020   | - | ENSG00000265354;       | CVB5_5Y2, CVB5_5Y |
| hsa_circ_0007743   | + | ENSG00000006695;       | CVB5_5Y2, CVB5_5Y |
| hsa_circ_0008603   | + | ENSG00000072210;       | CVB5_5Y2, CVB5_5Y |
| hsa_circ_0003796   | + | ENSG00000171634;       | CVB5_5Y2, CVB5_5Y |
| hsa_circ_0040609   | + | ENSG00000197943;       | CVB5_5Y2, CVB5_5Y |
| hsa_circ_0032305   | + | ENSG00000182185;       | CVB5_5Y2, CVB5_5Y |
| hsa_circ_0049192   | - | ENSG00000130816;       | CVB5_5Y2, CVB5_5Y |
| hsa_circ_0061178   | - | ENSG00000130584;       | CVB5_5Y2, CVB5_5Y |
| hsa_circ_0082171   | - | ENSG00000106344;       | CVB5_5Y2, CVB5_5Y |
| hsa_circ_0075675   | + | ENSG00000008083;       | CVB5_5Y2, CVB5_5Y |
| hsa_circ_0004271   | + | ENSG00000181789;       | CVB5_5Y2, CVB5_5Y |
| hsa_circ_0068472   | - | ENSG00000163918;       | CVB5_5Y2, CVB5_5Y |
| hsa_circ_0064679   | + | ENSG00000153551;       | CVB5_5Y2, CVB5_5Y |
| hsa_circ_0064889   | + | ENSG00000157036;       | CVB5_5Y2, CVB5_5Y |
| hsa_circ_0008639   | - | ENSG00000173473;       | CVB5_5Y2, CVB5_5Y |
| hsa_circ_0006838   | + | ENSG00000177479;       | CVB5_5Y2, CVB5_5Y |
| hsa_circ_0004355   | + | ENSG00000241553; ENSG0 | CVB5_5Y2, CVB5_5Y |
| hsa_circ_0004919   | + | ENSG00000138380;       | CVB5_5Y2, CVB5_5Y |
| hsa_circ_0008339   | - | ENSG00000132680;       | CVB5_5Y2, CVB5_5Y |
| hsa_circ_0015136   | - | ENSG00000143147;       | CVB5_5Y2, CVB5_5Y |
| hsa_circ_0002924   | - | ENSG00000118873;       | CVB5_5Y2, CVB5_5Y |
| hsa_circ_0089728   | + | ENSG00000181090;       | CVB5_5Y2, CVB5_5Y |
| novel_circ_0005264 | - | n/a                    | CVB5_5Y2, CVB5_5Y |
| novel_circ_0005717 | + | ENSG00000108848;       | CVB5_5Y2, CVB5_5Y |
| novel_circ_0005013 | - | ENSG00000132604;       | CVB5_5Y2, CVB5_5Y |
| novel_circ_0006753 | + | ENSG00000099331;       | CVB5_5Y2, CVB5_5Y |
| novel_circ_0006605 | + | ENSG00000060069;       | CVB5_5Y2, CVB5_5Y |
| novel_circ_0013189 | - | ENSG00000159692;       | CVB5_5Y2, CVB5_5Y |
| novel_circ_0012416 | + | ENSG00000188001;       | CVB5_5Y2, CVB5_5Y |
| novel_circ_0013033 | + | ENSG00000169379;       | CVB5_5Y2, CVB5_5Y |
| novel_circ_0010031 | - | ENSG00000135966;       | CVB5_5Y2, CVB5_5Y |
| hsa_circ_0027775   | + | ENSG00000111142;       | CVB5_5Y2, CVB5_5Y |
| hsa_circ_0008451   | - | ENSG00000110713;       | CVB5_5Y2, CVB5_5Y |
| hsa_circ_0007866   | - | ENSG00000234857; ENSG0 | CVB5_5Y2, CVB5_5Y |
| hsa_circ_0018281   | - | ENSG00000172671;       | CVB5_5Y2, CVB5_5Y |
| hsa_circ_0006243   | - | ENSG00000225830;       | CVB5_5Y2, CVB5_5Y |
| hsa_circ_0008874   | + | ENSG00000108239;       | CVB5_5Y2, CVB5_5Y |
| hsa_circ_0003638   | + | ENSG00000087095;       | CVB5_5Y2, CVB5_5Y |
| hsa_circ_0043280   | + | ENSG00000276234;       | CVB5_5Y2, CVB5_5Y |
| hsa_circ_0006631   | - | ENSG00000074755;       | CVB5_5Y2, CVB5_5Y |
| hsa_circ_0006255   | - | ENSG00000108840;       | CVB5_5Y2, CVB5_5Y |
| hsa_circ_0045931   | - | ENSG00000055483;       | CVB5_5Y2, CVB5_5Y |
| hsa_circ_0004519   | - | ENSG00000168411;       | CVB5_5Y2, CVB5_5Y |
| hsa_circ_0004033   | - | ENSG00000159322;       | CVB5_5Y2, CVB5_5Y |
| hsa_circ_0031615   | - | ENSG00000198604;       | CVB5_5Y2, CVB5_5Y |
| hsa_circ_0051399   | + | ENSG00000142273;       | CVB5_5Y2, CVB5_5Y |
| hsa_circ_0060745   | + | ENSG00000124207;       | CVB5_5Y2, CVB5_5Y |
| hsa_circ_0004343   | - | ENSG00000002822;       | CVB5_5Y2, CVB5_5Y |
| hsa_circ_0007823   | + | ENSG00000106346;       | CVB5_5Y2, CVB5_5Y |
| hsa_circ_0005629   | - | ENSG00000135074;       | CVB5_5Y2, CVB5_5Y |
| hsa_circ_0075143   | + | ENSG00000113761;       | CVB5_5Y2, CVB5_5Y |
| hsa_circ_0071189   | - | ENSG00000198589;       | CVB5_5Y2, CVB5_5Y |
| hsa_circ_0006498   | + | ENSG00000153767;       | CVB5_5Y2, CVB5_5Y |
| hsa_circ_0067013   | + | ENSG00000065485;       | CVB5_5Y2, CVB5_5Y |
| hsa_circ_0057041   | - | ENSG00000123600;       | CVB5_5Y2, CVB5_5Y |
| hsa_circ_0008979   | - | ENSG00000180398;       | CVB5_5Y2, CVB5_5Y |

|                    |   |                       |                  |
|--------------------|---|-----------------------|------------------|
| hsa_circ_0000015   | + | ENSG00000251503;      | CVB5_5Y2,CVB5_5Y |
| hsa_circ_0015837   | + | ENSG00000118200;      | CVB5_5Y2,CVB5_5Y |
| hsa_circ_0004493   | - | ENSG00000127483;      | CVB5_5Y2,CVB5_5Y |
| hsa_circ_0006556   | + | ENSG00000137145;      | CVB5_5Y2,CVB5_5Y |
| hsa_circ_0084663   | + | ENSG00000104218;      | CVB5_5Y2,CVB5_5Y |
| novel_circ_0003076 | - | ENSG00000123200;      | CVB5_5Y2,CVB5_5Y |
| novel_circ_0002050 | + | ENSG00000082805;      | CVB5_5Y2,CVB5_5Y |
| novel_circ_0005737 | - | n/a                   | CVB5_5Y2,CVB5_5Y |
| novel_circ_0006129 | - | ENSG00000157637;      | CVB5_5Y2,CVB5_5Y |
| novel_circ_0009591 | + | ENSG00000182670;      | CVB5_5Y2,CVB5_5Y |
| novel_circ_0015933 | + | ENSG00000106443;      | CVB5_5Y2,CVB5_5Y |
| novel_circ_0016332 | + | ENSG00000106052;      | CVB5_5Y2,CVB5_5Y |
| novel_circ_0012547 | - | ENSG00000235493;      | CVB5_5Y2,CVB5_5Y |
| novel_circ_0011668 | + | ENSG00000153561;      | CVB5_5Y2,CVB5_5Y |
| novel_circ_0007770 | + | ENSG00000134371;      | CVB5_5Y2,CVB5_5Y |
| novel_circ_0008577 | - | ENSG00000123473;      | CVB5_5Y2,CVB5_5Y |
| novel_circ_0018377 | + | ENSG00000119125;      | CVB5_5Y2,CVB5_5Y |
| novel_circ_0016873 | - | ENSG00000254093;      | CVB5_5Y2,CVB5_5Y |
| hsa_circ_0030117   | - | ENSG00000102763;      | CVB5_5Y2,CVB5_5Y |
| hsa_circ_0002154   | + | ENSG00000111785;      | CVB5_5Y2,CVB5_5Y |
| hsa_circ_0007468   | - | ENSG00000110851;      | CVB5_5Y2,CVB5_5Y |
| hsa_circ_0007776   | - | ENSG00000089234;      | CVB5_5Y2,CVB5_5Y |
| hsa_circ_0005310   | - | ENSG00000139697;      | CVB5_5Y2,CVB5_5Y |
| hsa_circ_0002826   | + | ENSG00000112787;      | CVB5_5Y2,CVB5_5Y |
| hsa_circ_0027618   | - | ENSG00000091039;      | CVB5_5Y2,CVB5_5Y |
| hsa_circ_0024295   | + | ENSG00000150768;      | CVB5_5Y2,CVB5_5Y |
| hsa_circ_0020670   | + | ENSG00000070047;      | CVB5_5Y2,CVB5_5Y |
| hsa_circ_0022308   | - | ENSG00000167986;      | CVB5_5Y2,CVB5_5Y |
| hsa_circ_0019610   | - | ENSG00000198408;      | CVB5_5Y2,CVB5_5Y |
| hsa_circ_0000235   | + | ENSG00000108100;      | CVB5_5Y2,CVB5_5Y |
| hsa_circ_0000239   | - | ENSG00000204130;      | CVB5_5Y2,CVB5_5Y |
| hsa_circ_0008102   | + | ENSG00000196233;      | CVB5_5Y2,CVB5_5Y |
| hsa_circ_0041152   | - | ENSG00000181031;      | CVB5_5Y2,CVB5_5Y |
| hsa_circ_0005320   | + | ENSG00000184640;      | CVB5_5Y2,CVB5_5Y |
| hsa_circ_0005606   | + | ENSG00000007545;      | CVB5_5Y2,CVB5_5Y |
| hsa_circ_0006795   | - | ENSG00000103550;      | CVB5_5Y2,CVB5_5Y |
| hsa_circ_0004603   | + | ENSG00000162063;      | CVB5_5Y2,CVB5_5Y |
| hsa_circ_0002439   | - | ENSG00000090447;      | CVB5_5Y2,CVB5_5Y |
| hsa_circ_0008168   | + | ENSG00000174442;      | CVB5_5Y2,CVB5_5Y |
| hsa_circ_0031446   | - | ENSG00000196792;      | CVB5_5Y2,CVB5_5Y |
| hsa_circ_0008554   | - | ENSG00000197256;      | CVB5_5Y2,CVB5_5Y |
| hsa_circ_0006941   | - | ENSG00000205517;      | CVB5_5Y2,CVB5_5Y |
| hsa_circ_0007180   | + | ENSG00000101751;      | CVB5_5Y2,CVB5_5Y |
| hsa_circ_0001202   | + | ENSG00000237438;      | CVB5_5Y2,CVB5_5Y |
| hsa_circ_0062577   | + | ENSG00000099991;      | CVB5_5Y2,CVB5_5Y |
| hsa_circ_0004868   | - | ENSG00000158470;      | CVB5_5Y2,CVB5_5Y |
| hsa_circ_0004770   | - | ENSG00000054793;      | CVB5_5Y2,CVB5_5Y |
| hsa_circ_0001730   | - | ENSG00000196411;      | CVB5_5Y2,CVB5_5Y |
| hsa_circ_0079422   | - | ENSG00000003147;      | CVB5_5Y2,CVB5_5Y |
| hsa_circ_0006715   | + | ENSG00000120254;      | CVB5_5Y2,CVB5_5Y |
| hsa_circ_0078539   | - | ENSG00000092820;      | CVB5_5Y2,CVB5_5Y |
| hsa_circ_0075917   | - | ENSG00000204623;      | CVB5_5Y2,CVB5_5Y |
| hsa_circ_0001571   | + | ENSG00000137275;      | CVB5_5Y2,CVB5_5Y |
| hsa_circ_0001603   | + | ENSG00000024048;      | CVB5_5Y2,CVB5_5Y |
| hsa_circ_0073748   | + | ENSG00000113368;      | CVB5_5Y2,CVB5_5Y |
| hsa_circ_0008595   | + | ENSG00000281398;ENSG0 | CVB5_5Y2,CVB5_5Y |
| hsa_circ_0002785   | - | ENSG00000152990;      | CVB5_5Y2,CVB5_5Y |
| hsa_circ_0003985   | + | ENSG00000174799;      | CVB5_5Y2,CVB5_5Y |

|                    |   |                       |                  |
|--------------------|---|-----------------------|------------------|
| hsa_circ_0002004   | + | ENSG00000114416;      | CVB5_5Y2,CVB5_5Y |
| hsa_circ_0002266   | + | ENSG00000186001;      | CVB5_5Y2,CVB5_5Y |
| hsa_circ_0001289   | - | ENSG00000181555;      | CVB5_5Y2,CVB5_5Y |
| hsa_circ_0065243   | - | ENSG00000173473;      | CVB5_5Y2,CVB5_5Y |
| hsa_circ_0065871   | + | ENSG00000114738;      | CVB5_5Y2,CVB5_5Y |
| hsa_circ_0004862   | + | ENSG00000144535;      | CVB5_5Y2,CVB5_5Y |
| hsa_circ_0001018   | - | ENSG00000115484;      | CVB5_5Y2,CVB5_5Y |
| hsa_circ_0013743   | + | ENSG00000198162;      | CVB5_5Y2,CVB5_5Y |
| hsa_circ_0003942   | + | ENSG00000135837;      | CVB5_5Y2,CVB5_5Y |
| hsa_circ_0000166   | + | ENSG00000157181;      | CVB5_5Y2,CVB5_5Y |
| hsa_circ_0017241   | + | ENSG00000054282;      | CVB5_5Y2,CVB5_5Y |
| hsa_circ_0005174   | - | ENSG00000197989;      | CVB5_5Y2,CVB5_5Y |
| hsa_circ_0008389   | - | ENSG00000007923;      | CVB5_5Y2,CVB5_5Y |
| hsa_circ_0001905   | + | ENSG00000181090;      | CVB5_5Y2,CVB5_5Y |
| hsa_circ_0007367   | - | ENSG00000137073;      | CVB5_5Y2,CVB5_5Y |
| hsa_circ_0003066   | - | ENSG00000169398;      | CVB5_5Y2,CVB5_5Y |
| hsa_circ_0083465   | + | ENSG00000078674;      | CVB5_5Y2,CVB5_5Y |
| hsa_circ_0002961   | + | ENSG00000147649;      | CVB5_5Y2,CVB5_5Y |
| novel_circ_0003070 | - | ENSG00000123200;      | CVB5_5Y2,CVB5_5Y |
| novel_circ_0001028 | - | ENSG00000110315;      | CVB5_5Y2,CVB5_5Y |
| novel_circ_0001525 | + | ENSG00000251562;      | CVB5_5Y2,CVB5_5Y |
| novel_circ_0001550 | - | ENSG00000110066;      | CVB5_5Y2,CVB5_5Y |
| novel_circ_0001562 | + | ENSG00000110075;      | CVB5_5Y2,CVB5_5Y |
| novel_circ_0005791 | - | ENSG00000266086;ENSG0 | CVB5_5Y2,CVB5_5Y |
| novel_circ_0005184 | + | ENSG00000158545;      | CVB5_5Y2,CVB5_5Y |
| novel_circ_0003942 | - | ENSG00000140470;      | CVB5_5Y2,CVB5_5Y |
| novel_circ_0004529 | + | ENSG00000140525;      | CVB5_5Y2,CVB5_5Y |
| novel_circ_0003684 | + | ENSG00000054654;      | CVB5_5Y2,CVB5_5Y |
| novel_circ_0006699 | + | ENSG00000099622;      | CVB5_5Y2,CVB5_5Y |
| novel_circ_0016348 | - | ENSG00000196295;      | CVB5_5Y2,CVB5_5Y |
| novel_circ_0012458 | - | ENSG00000163961;      | CVB5_5Y2,CVB5_5Y |
| novel_circ_0012782 | - | ENSG00000173473;      | CVB5_5Y2,CVB5_5Y |
| novel_circ_0011626 | + | n/a                   | CVB5_5Y2,CVB5_5Y |
| novel_circ_0017032 | - | ENSG00000129295;      | CVB5_5Y2,CVB5_5Y |
| novel_circ_0017572 | - | ENSG00000076554;ENSG0 | CVB5_5Y2,CVB5_5Y |
| hsa_circ_0009152   | + | ENSG00000172766;      | CVB5_5Y2,CVB5_5Y |
| hsa_circ_0006104   | - | ENSG00000175203;      | CVB5_5Y2,CVB5_5Y |
| hsa_circ_0009130   | - | ENSG00000064932;      | CVB5_5Y2,CVB5_5Y |
| hsa_circ_0005837   | + | ENSG00000276043;      | CVB5_5Y2,CVB5_5Y |
| hsa_circ_0006476   | - | ENSG00000197961;      | CVB5_5Y2,CVB5_5Y |
| hsa_circ_0005133   | + | ENSG00000204580;      | CVB5_5Y2,CVB5_5Y |
| hsa_circ_0005372   | + | ENSG00000155903;      | CVB5_5Y2,CVB5_5Y |
| hsa_circ_0064789   | - | ENSG00000163539;      | CVB5_5Y2,CVB5_5Y |
| hsa_circ_0004340   | - | ENSG00000144736;      | CVB5_5Y2,CVB5_5Y |
| hsa_circ_0004883   | - | ENSG00000136861;      | CVB5_5Y2,CVB5_5Y |
| novel_circ_0004345 | + | ENSG00000188779;      | CVB5_5Y2,CVB5_5Y |
| novel_circ_0013744 | + | ENSG00000134851;      | CVB5_5Y2,CVB5_5Y |
| novel_circ_0012325 | + | ENSG00000131374;      | CVB5_5Y2,CVB5_5Y |
| novel_circ_0008195 | + | ENSG00000077585;      | CVB5_5Y2,CVB5_5Y |
| novel_circ_0018100 | - | ENSG00000165724;      | CVB5_5Y2,CVB5_5Y |
| hsa_circ_0091175   | - | ENSG00000165288;      | CVB5_5Y2,CVB5_5Y |
| hsa_circ_0022591   | + | ENSG00000168003;      | CVB5_5Y2,CVB5_5Y |
| hsa_circ_0002042   | - | ENSG00000151240;      | CVB5_5Y2,CVB5_5Y |
| hsa_circ_0040786   | - | ENSG00000104731;      | CVB5_5Y2,CVB5_5Y |
| hsa_circ_0031357   | - | ENSG00000260669;ENSG0 | CVB5_5Y2,CVB5_5Y |
| hsa_circ_0031359   | - | ENSG00000254692;ENSG0 | CVB5_5Y2,CVB5_5Y |
| hsa_circ_0002324   | - | ENSG00000160392;      | CVB5_5Y2,CVB5_5Y |
| hsa_circ_0008809   | + | ENSG00000106263;      | CVB5_5Y2,CVB5_5Y |

|                    |   |                        |                   |
|--------------------|---|------------------------|-------------------|
| hsa_circ_0067163   | - | ENSG00000163870;       | CVB5_5Y2, CVB5_5Y |
| hsa_circ_0006840   | - | ENSG00000136527;       | CVB5_5Y2, CVB5_5Y |
| hsa_circ_0068462   | + | ENSG00000156976;       | CVB5_5Y2, CVB5_5Y |
| hsa_circ_0002229   | + | ENSG00000134324;       | CVB5_5Y2, CVB5_5Y |
| hsa_circ_0057725   | - | ENSG00000013441;       | CVB5_5Y2, CVB5_5Y |
| hsa_circ_0009910   | + | ENSG00000116688;       | CVB5_5Y2, CVB5_5Y |
| hsa_circ_0007110   | + | ENSG00000137145;       | CVB5_5Y2, CVB5_5Y |
| hsa_circ_0006915   | - | ENSG00000040341;       | CVB5_5Y2, CVB5_5Y |
| novel_circ_0000460 | + | ENSG00000285737;       | CVB5_5Y2, CVB5_5Y |
| novel_circ_0000821 | - | ENSG00000148606;       | CVB5_5Y2, CVB5_5Y |
| novel_circ_0005371 | - | ENSG00000070444;       | CVB5_5Y2, CVB5_5Y |
| novel_circ_0005792 | + | ENSG00000264364;       | CVB5_5Y2, CVB5_5Y |
| novel_circ_0003487 | - | ENSG00000198604;       | CVB5_5Y2, CVB5_5Y |
| novel_circ_0003759 | + | ENSG00000119707;       | CVB5_5Y2, CVB5_5Y |
| novel_circ_0006849 | - | ENSG00000121289;       | CVB5_5Y2, CVB5_5Y |
| novel_circ_0015108 | - | ENSG00000112339;       | CVB5_5Y2, CVB5_5Y |
| novel_circ_0012809 | + | ENSG00000177479;       | CVB5_5Y2, CVB5_5Y |
| novel_circ_0008291 | - | ENSG00000162714;       | CVB5_5Y2, CVB5_5Y |
| novel_circ_0008741 | + | ENSG00000132849;       | CVB5_5Y2, CVB5_5Y |
| novel_circ_0018209 | - | ENSG00000080608;       | CVB5_5Y2, CVB5_5Y |
| hsa_circ_0091768   | - | ENSG00000185825;       | CVB5_5Y2, CVB5_5Y |
| hsa_circ_0089974   | + | ENSG00000188158;       | CVB5_5Y2, CVB5_5Y |
| hsa_circ_0027774   | + | ENSG00000111142;       | CVB5_5Y2, CVB5_5Y |
| hsa_circ_0005285   | - | ENSG00000107554;       | CVB5_5Y2, CVB5_5Y |
| hsa_circ_0004678   | + | ENSG00000159202;       | CVB5_5Y2, CVB5_5Y |
| hsa_circ_0005330   | + | ENSG00000189091;       | CVB5_5Y2, CVB5_5Y |
| hsa_circ_0004866   | + | ENSG00000140455;       | CVB5_5Y2, CVB5_5Y |
| hsa_circ_0004386   | + | ENSG00000189042;       | CVB5_5Y2, CVB5_5Y |
| hsa_circ_0005317   | + | ENSG00000130529;       | CVB5_5Y2, CVB5_5Y |
| hsa_circ_0063604   | + | ENSG00000100147;       | CVB5_5Y2, CVB5_5Y |
| hsa_circ_0081746   | + | ENSG00000105819;       | CVB5_5Y2, CVB5_5Y |
| hsa_circ_0079929   | + | ENSG00000065883;       | CVB5_5Y2, CVB5_5Y |
| hsa_circ_0078241   | - | ENSG00000120253;       | CVB5_5Y2, CVB5_5Y |
| hsa_circ_0075872   | + | ENSG00000079691;       | CVB5_5Y2, CVB5_5Y |
| hsa_circ_0005153   | + | ENSG00000153113;       | CVB5_5Y2, CVB5_5Y |
| hsa_circ_0003461   | + | ENSG00000151718;       | CVB5_5Y2, CVB5_5Y |
| hsa_circ_0002554   | - | ENSG00000113812;       | CVB5_5Y2, CVB5_5Y |
| hsa_circ_0066290   | + | ENSG00000136068;       | CVB5_5Y2, CVB5_5Y |
| hsa_circ_0009028   | + | ENSG00000198162;       | CVB5_5Y2, CVB5_5Y |
| hsa_circ_0010146   | - | ENSG00000037637;       | CVB5_5Y2, CVB5_5Y |
| hsa_circ_0010458   | - | ENSG00000075151;       | CVB5_5Y2, CVB5_5Y |
| hsa_circ_0011115   | - | ENSG00000158161;       | CVB5_5Y2, CVB5_5Y |
| novel_circ_0001598 | + | ENSG00000131626;       | CVB5_5Y2, CVB5_5Y |
| novel_circ_0004104 | - | ENSG00000140259;       | CVB5_5Y2, CVB5_5Y |
| novel_circ_0007139 | - | ENSG00000125731;       | CVB5_5Y2, CVB5_5Y |
| novel_circ_0016274 | + | ENSG00000169193;       | CVB5_5Y2, CVB5_5Y |
| novel_circ_0016650 | + | ENSG00000187257;       | CVB5_5Y2, CVB5_5Y |
| novel_circ_0015807 | - | ENSG00000123552;       | CVB5_5Y2, CVB5_5Y |
| novel_circ_0014516 | + | ENSG00000164190;       | CVB5_5Y2, CVB5_5Y |
| novel_circ_0013034 | + | ENSG00000168137;       | CVB5_5Y2, CVB5_5Y |
| novel_circ_0007952 | - | ENSG00000090686;       | CVB5_5Y2, CVB5_5Y |
| novel_circ_0008184 | + | ENSG00000285053; ENSG0 | CVB5_5Y2, CVB5_5Y |
| hsa_circ_0008902   | + | ENSG00000152520;       | CVB5_5Y2, CVB5_5Y |
| hsa_circ_0004766   | - | ENSG00000100814;       | CVB5_5Y2, CVB5_5Y |
| hsa_circ_0049282   | - | ENSG00000129354;       | CVB5_5Y2, CVB5_5Y |
| hsa_circ_0002462   | + | ENSG00000172795;       | CVB5_5Y2, CVB5_5Y |
| hsa_circ_0072271   | - | ENSG00000113569;       | CVB5_5Y2, CVB5_5Y |
| hsa_circ_0069249   | - | ENSG00000151552;       | CVB5_5Y2, CVB5_5Y |

|                    |   |                        |                   |
|--------------------|---|------------------------|-------------------|
| hsa_circ_0008062   | + | ENSG00000172939;       | CVB5_5Y2, CVB5_5Y |
| hsa_circ_0065258   | - | ENSG00000173473;       | CVB5_5Y2, CVB5_5Y |
| hsa_circ_0016733   | - | ENSG00000143776;       | CVB5_5Y2, CVB5_5Y |
| hsa_circ_0004834   | + | ENSG00000270106; ENSG0 | CVB5_5Y2, CVB5_5Y |
| hsa_circ_0007617   | + | ENSG00000121766;       | CVB5_5Y2, CVB5_5Y |
| hsa_circ_0001880   | + | ENSG00000119318;       | CVB5_5Y2, CVB5_5Y |
| novel_circ_0018731 | - | ENSG00000181544;       | CVB5_5Y2, CVB5_5Y |
| novel_circ_0014596 | + | ENSG00000164258;       | CVB5_5Y2, CVB5_5Y |
| novel_circ_0010613 | - | ENSG00000115942;       | CVB5_5Y2, CVB5_5Y |
| novel_circ_0009026 | + | ENSG00000117528;       | CVB5_5Y2, CVB5_5Y |
| hsa_circ_0006598   | - | ENSG00000185291;       | CVB5_5Y3          |
| hsa_circ_0005518   | - | ENSG00000086758;       | CVB5_5Y3          |
| hsa_circ_0091038   | + | ENSG00000147162;       | CVB5_5Y3          |
| hsa_circ_0029772   | - | ENSG00000102699;       | CVB5_5Y3          |
| hsa_circ_0030207   | + | ENSG00000136141;       | CVB5_5Y3          |
| hsa_circ_0030676   | + | ENSG00000065150;       | CVB5_5Y3          |
| hsa_circ_0027867   | + | ENSG00000136021;       | CVB5_5Y3          |
| hsa_circ_0029348   | - | ENSG00000073060;       | CVB5_5Y3          |
| hsa_circ_0025851   | + | ENSG00000087470;       | CVB5_5Y3          |
| hsa_circ_0026240   | + | ENSG00000161813;       | CVB5_5Y3          |
| hsa_circ_0004538   | - | ENSG00000110925;       | CVB5_5Y3          |
| hsa_circ_0026626   | + | ENSG00000185591;       | CVB5_5Y3          |
| hsa_circ_0027380   | + | ENSG00000196935;       | CVB5_5Y3          |
| hsa_circ_0027459   | - | ENSG00000111554;       | CVB5_5Y3          |
| hsa_circ_0027502   | + | ENSG00000111605;       | CVB5_5Y3          |
| hsa_circ_0005612   | + | ENSG00000149311;       | CVB5_5Y3          |
| hsa_circ_0024296   | + | ENSG00000150768;       | CVB5_5Y3          |
| hsa_circ_0003509   | - | ENSG00000149187;       | CVB5_5Y3          |
| hsa_circ_0022723   | - | ENSG00000110047;       | CVB5_5Y3          |
| hsa_circ_0023885   | - | ENSG00000073921;       | CVB5_5Y3          |
| hsa_circ_0023925   | - | ENSG00000073921;       | CVB5_5Y3          |
| hsa_circ_0006555   | - | ENSG00000166169;       | CVB5_5Y3          |
| hsa_circ_0002676   | - | ENSG00000065154;       | CVB5_5Y3          |
| hsa_circ_0008123   | + | ENSG00000107938;       | CVB5_5Y3          |
| hsa_circ_0000225   | + | ENSG00000120539;       | CVB5_5Y3          |
| hsa_circ_0018074   | - | ENSG00000107951;       | CVB5_5Y3          |
| hsa_circ_0018196   | + | ENSG00000095794;       | CVB5_5Y3          |
| hsa_circ_0018882   | + | ENSG00000035403;       | CVB5_5Y3          |
| hsa_circ_0018889   | + | ENSG00000035403;       | CVB5_5Y3          |
| hsa_circ_0019240   | - | ENSG00000173145;       | CVB5_5Y3          |
| hsa_circ_0019488   | - | ENSG00000107554;       | CVB5_5Y3          |
| hsa_circ_0041290   | - | ENSG00000174231;       | CVB5_5Y3          |
| hsa_circ_0042341   | - | ENSG00000176974;       | CVB5_5Y3          |
| hsa_circ_0041383   | - | ENSG00000070366;       | CVB5_5Y3          |
| hsa_circ_0005336   | + | ENSG00000109046;       | CVB5_5Y3          |
| hsa_circ_0043695   | - | ENSG00000141698;       | CVB5_5Y3          |
| hsa_circ_0007272   | - | ENSG00000170832;       | CVB5_5Y3          |
| hsa_circ_0045041   | - | ENSG00000108506;       | CVB5_5Y3          |
| hsa_circ_0045698   | + | ENSG00000132470;       | CVB5_5Y3          |
| hsa_circ_0046264   | - | ENSG00000185624;       | CVB5_5Y3          |
| hsa_circ_0046430   | + | ENSG00000141568;       | CVB5_5Y3          |
| hsa_circ_0038073   | + | ENSG00000103222;       | CVB5_5Y3          |
| hsa_circ_0006663   | - | ENSG00000007392;       | CVB5_5Y3          |
| hsa_circ_0039202   | - | ENSG00000069329;       | CVB5_5Y3          |
| hsa_circ_0040559   | - | ENSG00000065427;       | CVB5_5Y3          |
| hsa_circ_0034762   | + | ENSG00000137802;       | CVB5_5Y3          |
| hsa_circ_0003829   | + | ENSG00000166734;       | CVB5_5Y3          |
| hsa_circ_0035818   | + | ENSG00000028528;       | CVB5_5Y3          |

|                  |   |                       |          |
|------------------|---|-----------------------|----------|
| hsa_circ_0004506 | - | ENSG00000090487;      | CVB5_5Y3 |
| hsa_circ_0004393 | - | ENSG00000174485;      | CVB5_5Y3 |
| hsa_circ_0003166 | + | ENSG00000137807;      | CVB5_5Y3 |
| hsa_circ_0007103 | - | ENSG00000169375;      | CVB5_5Y3 |
| hsa_circ_0036768 | + | ENSG00000185033;      | CVB5_5Y3 |
| hsa_circ_0033598 | + | ENSG00000179364;      | CVB5_5Y3 |
| hsa_circ_0031114 | - | ENSG00000129566;      | CVB5_5Y3 |
| hsa_circ_0031725 | - | ENSG00000100934;      | CVB5_5Y3 |
| hsa_circ_0031845 | - | ENSG00000087299;      | CVB5_5Y3 |
| hsa_circ_0032496 | + | ENSG00000119707;      | CVB5_5Y3 |
| hsa_circ_0032704 | + | ENSG00000119685;      | CVB5_5Y3 |
| hsa_circ_0032740 | + | ENSG00000089916;      | CVB5_5Y3 |
| hsa_circ_0049383 | + | ENSG00000130164;      | CVB5_5Y3 |
| hsa_circ_0049434 | - | ENSG00000130158;      | CVB5_5Y3 |
| hsa_circ_0048454 | + | ENSG00000125912;      | CVB5_5Y3 |
| hsa_circ_0000941 | + | ENSG00000007047;      | CVB5_5Y3 |
| hsa_circ_0046995 | + | ENSG00000101639;      | CVB5_5Y3 |
| hsa_circ_0047749 | + | ENSG00000091157;      | CVB5_5Y3 |
| hsa_circ_0062239 | - | ENSG00000242259;ENSG0 | CVB5_5Y3 |
| hsa_circ_0063327 | - | ENSG00000100201;      | CVB5_5Y3 |
| hsa_circ_0063707 | + | ENSG00000188677;      | CVB5_5Y3 |
| hsa_circ_0059187 | - | ENSG00000256566;ENSG0 | CVB5_5Y3 |
| hsa_circ_0059858 | + | ENSG00000078699;      | CVB5_5Y3 |
| hsa_circ_0001139 | + | ENSG00000125970;      | CVB5_5Y3 |
| hsa_circ_0060043 | - | ENSG00000088298;      | CVB5_5Y3 |
| hsa_circ_0006158 | + | ENSG00000156273;      | CVB5_5Y3 |
| hsa_circ_0006075 | + | ENSG00000182670;      | CVB5_5Y3 |
| hsa_circ_0081739 | - | ENSG00000161048;      | CVB5_5Y3 |
| hsa_circ_0081863 | + | ENSG00000135249;      | CVB5_5Y3 |
| hsa_circ_0082401 | + | ENSG00000128585;      | CVB5_5Y3 |
| hsa_circ_0082854 | - | ENSG00000197362;      | CVB5_5Y3 |
| hsa_circ_0001770 | - | ENSG00000055609;      | CVB5_5Y3 |
| hsa_circ_0079519 | - | ENSG00000071189;      | CVB5_5Y3 |
| hsa_circ_0079766 | + | ENSG00000105778;      | CVB5_5Y3 |
| hsa_circ_0080059 | + | ENSG00000105953;      | CVB5_5Y3 |
| hsa_circ_0079327 | - | ENSG00000086232;      | CVB5_5Y3 |
| hsa_circ_0079377 | + | ENSG00000136247;      | CVB5_5Y3 |
| hsa_circ_0079390 | + | ENSG00000146576;      | CVB5_5Y3 |
| hsa_circ_0080881 | + | ENSG00000127955;      | CVB5_5Y3 |
| hsa_circ_0079085 | + | ENSG00000239857;ENSG0 | CVB5_5Y3 |
| hsa_circ_0081026 | - | ENSG00000127980;      | CVB5_5Y3 |
| hsa_circ_0081301 | + | ENSG00000196367;      | CVB5_5Y3 |
| hsa_circ_0077648 | - | ENSG00000009413;      | CVB5_5Y3 |
| hsa_circ_0077726 | - | ENSG00000047932;      | CVB5_5Y3 |
| hsa_circ_0077913 | - | ENSG00000135541;      | CVB5_5Y3 |
| hsa_circ_0001984 | + | ENSG00000120265;      | CVB5_5Y3 |
| hsa_circ_0078674 | + | ENSG00000130396;      | CVB5_5Y3 |
| hsa_circ_0078737 | - | ENSG00000184465;      | CVB5_5Y3 |
| hsa_circ_0078773 | + | ENSG00000112584;      | CVB5_5Y3 |
| hsa_circ_0076155 | - | ENSG00000096060;      | CVB5_5Y3 |
| hsa_circ_0076747 | - | ENSG00000112118;      | CVB5_5Y3 |
| hsa_circ_0001612 | + | ENSG00000112701;      | CVB5_5Y3 |
| hsa_circ_0001622 | + | ENSG00000118412;      | CVB5_5Y3 |
| hsa_circ_0077408 | - | ENSG00000146263;      | CVB5_5Y3 |
| hsa_circ_0073691 | + | ENSG00000205302;      | CVB5_5Y3 |
| hsa_circ_0073747 | + | ENSG00000113368;      | CVB5_5Y3 |
| hsa_circ_0074206 | + | ENSG00000015479;ENSG0 | CVB5_5Y3 |
| hsa_circ_0008731 | - | ENSG00000177058;      | CVB5_5Y3 |

|                  |   |                       |          |
|------------------|---|-----------------------|----------|
| hsa_circ_0072540 | + | ENSG00000062194;      | CVB5_5Y3 |
| hsa_circ_0072548 | + | ENSG00000062194;      | CVB5_5Y3 |
| hsa_circ_0072732 | + | ENSG00000112851;      | CVB5_5Y3 |
| hsa_circ_0071758 | - | ENSG00000037474;      | CVB5_5Y3 |
| hsa_circ_0006859 | - | ENSG00000171617;      | CVB5_5Y3 |
| hsa_circ_0008408 | + | ENSG00000109685;      | CVB5_5Y3 |
| hsa_circ_0069776 | + | ENSG00000134851;      | CVB5_5Y3 |
| hsa_circ_0069819 | + | ENSG00000174799;      | CVB5_5Y3 |
| hsa_circ_0070000 | - | ENSG00000138757;      | CVB5_5Y3 |
| hsa_circ_0004334 | - | ENSG00000138674;      | CVB5_5Y3 |
| hsa_circ_0067322 | - | ENSG00000172765;      | CVB5_5Y3 |
| hsa_circ_0067619 | - | ENSG00000114127;      | CVB5_5Y3 |
| hsa_circ_0067627 | - | ENSG00000175054;      | CVB5_5Y3 |
| hsa_circ_0067680 | + | ENSG00000181744;      | CVB5_5Y3 |
| hsa_circ_0067880 | + | ENSG00000008952;      | CVB5_5Y3 |
| hsa_circ_0006893 | - | ENSG00000173889;      | CVB5_5Y3 |
| hsa_circ_0065649 | - | ENSG00000067560;      | CVB5_5Y3 |
| hsa_circ_0008107 | - | ENSG00000168374;      | CVB5_5Y3 |
| hsa_circ_0066273 | + | ENSG00000163681;      | CVB5_5Y3 |
| hsa_circ_0052602 | - | ENSG00000115758;      | CVB5_5Y3 |
| hsa_circ_0056285 | + | ENSG00000144118;      | CVB5_5Y3 |
| hsa_circ_0005892 | - | ENSG00000144233;      | CVB5_5Y3 |
| hsa_circ_0006445 | + | ENSG00000115183;      | CVB5_5Y3 |
| hsa_circ_0008427 | + | ENSG00000144426;      | CVB5_5Y3 |
| hsa_circ_0004778 | - | ENSG00000055917;      | CVB5_5Y3 |
| hsa_circ_0008091 | - | ENSG00000023228;      | CVB5_5Y3 |
| hsa_circ_0058905 | - | ENSG00000068024;      | CVB5_5Y3 |
| hsa_circ_0054609 | - | ENSG00000085760;      | CVB5_5Y3 |
| hsa_circ_0008361 | + | ENSG00000162929;      | CVB5_5Y3 |
| hsa_circ_0054961 | + | ENSG00000119844;      | CVB5_5Y3 |
| hsa_circ_0002234 | - | ENSG00000134222;      | CVB5_5Y3 |
| hsa_circ_0009964 | + | ENSG00000048707;      | CVB5_5Y3 |
| hsa_circ_0005948 | + | ENSG00000143624;      | CVB5_5Y3 |
| hsa_circ_0010112 | + | ENSG00000065526;      | CVB5_5Y3 |
| hsa_circ_0015257 | + | ENSG00000010165;      | CVB5_5Y3 |
| hsa_circ_0015489 | + | ENSG00000135837;      | CVB5_5Y3 |
| hsa_circ_0000007 | - | ENSG00000078369;      | CVB5_5Y3 |
| hsa_circ_0000027 | - | ENSG00000117298;      | CVB5_5Y3 |
| hsa_circ_0016485 | - | ENSG00000136628;      | CVB5_5Y3 |
| hsa_circ_0007543 | + | ENSG00000054282;      | CVB5_5Y3 |
| hsa_circ_0017348 | - | ENSG00000196418;      | CVB5_5Y3 |
| hsa_circ_0011422 | + | ENSG00000254553;ENSG0 | CVB5_5Y3 |
| hsa_circ_0011543 | + | ENSG00000146463;      | CVB5_5Y3 |
| hsa_circ_0011625 | + | ENSG00000092847;      | CVB5_5Y3 |
| hsa_circ_0012476 | - | ENSG00000078618;      | CVB5_5Y3 |
| hsa_circ_0009472 | - | ENSG00000131697;      | CVB5_5Y3 |
| hsa_circ_0012930 | + | ENSG00000116754;      | CVB5_5Y3 |
| hsa_circ_0013218 | - | ENSG00000067334;      | CVB5_5Y3 |
| hsa_circ_0088025 | - | ENSG00000136813;      | CVB5_5Y3 |
| hsa_circ_0088563 | + | ENSG00000136933;      | CVB5_5Y3 |
| hsa_circ_0088581 | + | ENSG00000165219;      | CVB5_5Y3 |
| hsa_circ_0089277 | - | ENSG00000107290;      | CVB5_5Y3 |
| hsa_circ_0005118 | + | ENSG00000240498;      | CVB5_5Y3 |
| hsa_circ_0086600 | - | ENSG00000137055;      | CVB5_5Y3 |
| hsa_circ_0001837 | + | ENSG00000120158;      | CVB5_5Y3 |
| hsa_circ_0087162 | - | ENSG00000188647;      | CVB5_5Y3 |
| hsa_circ_0085567 | - | ENSG00000153310;      | CVB5_5Y3 |
| hsa_circ_0083807 | + | ENSG00000012232;      | CVB5_5Y3 |



|                    |   |                       |          |
|--------------------|---|-----------------------|----------|
| hsa_circ_0084318   | - | ENSG00000253729;      | CVB5_5Y3 |
| hsa_circ_0002562   | + | ENSG00000285791;      | CVB5_5Y3 |
| novel_circ_0018745 | - | ENSG00000198910;      | CVB5_5Y3 |
| novel_circ_0018871 | - | ENSG00000131089;      | CVB5_5Y3 |
| novel_circ_0003065 | - | ENSG00000123200;      | CVB5_5Y3 |
| novel_circ_0003174 | - | ENSG00000136111;      | CVB5_5Y3 |
| novel_circ_0001990 | - | ENSG00000173064;      | CVB5_5Y3 |
| novel_circ_0002007 | + | ENSG00000111331;      | CVB5_5Y3 |
| novel_circ_0002200 | + | ENSG00000082805;      | CVB5_5Y3 |
| novel_circ_0002548 | - | ENSG00000166881;      | CVB5_5Y3 |
| novel_circ_0002575 | + | ENSG00000196935;      | CVB5_5Y3 |
| novel_circ_0002614 | + | ENSG00000111581;      | CVB5_5Y3 |
| novel_circ_0002629 | + | ENSG00000135679;      | CVB5_5Y3 |
| novel_circ_0002651 | + | ENSG00000258168;      | CVB5_5Y3 |
| novel_circ_0002666 | - | ENSG00000180881;      | CVB5_5Y3 |
| novel_circ_0001049 | + | ENSG00000166266;      | CVB5_5Y3 |
| novel_circ_0001360 | + | ENSG00000026508;      | CVB5_5Y3 |
| novel_circ_0001393 | - | ENSG00000110713;      | CVB5_5Y3 |
| novel_circ_0001532 | + | ENSG00000174516;      | CVB5_5Y3 |
| novel_circ_0001565 | + | ENSG00000110075;      | CVB5_5Y3 |
| novel_circ_0001573 | + | ENSG00000110075;      | CVB5_5Y3 |
| novel_circ_0000005 | + | ENSG00000166135;      | CVB5_5Y3 |
| novel_circ_0000021 | - | ENSG00000186862;      | CVB5_5Y3 |
| novel_circ_0000032 | - | ENSG00000198408;      | CVB5_5Y3 |
| novel_circ_0000187 | - | ENSG00000107581;      | CVB5_5Y3 |
| novel_circ_0000341 | - | ENSG00000148773;      | CVB5_5Y3 |
| novel_circ_0000382 | - | ENSG00000152465;      | CVB5_5Y3 |
| novel_circ_0000516 | - | ENSG00000170759;      | CVB5_5Y3 |
| novel_circ_0000608 | - | ENSG00000227345;      | CVB5_5Y3 |
| novel_circ_0000632 | + | ENSG00000108021;      | CVB5_5Y3 |
| novel_circ_0000688 | - | ENSG00000108187;      | CVB5_5Y3 |
| novel_circ_0000700 | - | ENSG00000138346;      | CVB5_5Y3 |
| novel_circ_0000752 | + | ENSG00000099284;      | CVB5_5Y3 |
| novel_circ_0000911 | + | ENSG00000138160;      | CVB5_5Y3 |
| novel_circ_0000912 | + | ENSG00000138160;      | CVB5_5Y3 |
| novel_circ_0000984 | + | ENSG00000023839;      | CVB5_5Y3 |
| novel_circ_0005278 | - | ENSG00000175106;      | CVB5_5Y3 |
| novel_circ_0005307 | - | ENSG00000186532;      | CVB5_5Y3 |
| novel_circ_0005335 | + | ENSG00000072134;      | CVB5_5Y3 |
| novel_circ_0005452 | + | ENSG00000196712;      | CVB5_5Y3 |
| novel_circ_0005572 | + | ENSG00000141756;      | CVB5_5Y3 |
| novel_circ_0005712 | + | ENSG00000108846;      | CVB5_5Y3 |
| novel_circ_0005767 | - | ENSG00000005100;      | CVB5_5Y3 |
| novel_circ_0005897 | - | ENSG00000108510;      | CVB5_5Y3 |
| novel_circ_0005921 | - | ENSG00000008283;      | CVB5_5Y3 |
| novel_circ_0005937 | - | ENSG00000256525;      | CVB5_5Y3 |
| novel_circ_0006055 | - | ENSG00000108469;      | CVB5_5Y3 |
| novel_circ_0006160 | - | ENSG00000169710;      | CVB5_5Y3 |
| novel_circ_0004602 | - | ENSG00000188897;      | CVB5_5Y3 |
| novel_circ_0004647 | + | ENSG00000072864;      | CVB5_5Y3 |
| novel_circ_0004685 | - | ENSG00000260342;ENSG0 | CVB5_5Y3 |
| novel_circ_0004817 | + | ENSG00000080603;ENSG0 | CVB5_5Y3 |
| novel_circ_0004845 | - | ENSG00000005339;      | CVB5_5Y3 |
| novel_circ_0004902 | - | ENSG00000118898;      | CVB5_5Y3 |
| novel_circ_0004904 | + | ENSG00000155393;      | CVB5_5Y3 |
| novel_circ_0004103 | - | ENSG00000140259;      | CVB5_5Y3 |
| novel_circ_0004133 | + | ENSG00000185880;      | CVB5_5Y3 |
| novel_circ_0004212 | - | ENSG00000137776;      | CVB5_5Y3 |

|                    |   |                       |          |
|--------------------|---|-----------------------|----------|
| novel_circ_0004264 | - | ENSG00000259316;ENSG0 | CVB5_5Y3 |
| novel_circ_0004423 | - | ENSG00000169371;      | CVB5_5Y3 |
| novel_circ_0004491 | + | ENSG00000259429;      | CVB5_5Y3 |
| novel_circ_0003362 | - | ENSG00000126215;      | CVB5_5Y3 |
| novel_circ_0003402 | - | ENSG00000092036;ENSG0 | CVB5_5Y3 |
| novel_circ_0003553 | - | ENSG00000165525;      | CVB5_5Y3 |
| novel_circ_0003586 | - | ENSG00000151748;      | CVB5_5Y3 |
| novel_circ_0003720 | - | ENSG00000139990;      | CVB5_5Y3 |
| novel_circ_0003721 | - | ENSG00000139990;      | CVB5_5Y3 |
| novel_circ_0003783 | + | ENSG00000119725;ENSG0 | CVB5_5Y3 |
| novel_circ_0003876 | - | ENSG00000015133;      | CVB5_5Y3 |
| novel_circ_0003892 | - | ENSG00000011114;      | CVB5_5Y3 |
| novel_circ_0006744 | - | ENSG00000127526;      | CVB5_5Y3 |
| novel_circ_0006827 | + | n/a                   | CVB5_5Y3 |
| novel_circ_0006840 | + | ENSG00000168813;      | CVB5_5Y3 |
| novel_circ_0006928 | - | ENSG00000275395;      | CVB5_5Y3 |
| novel_circ_0006968 | + | ENSG00000167674;      | CVB5_5Y3 |
| novel_circ_0006991 | - | ENSG00000125755;      | CVB5_5Y3 |
| novel_circ_0006997 | - | ENSG00000130749;      | CVB5_5Y3 |
| novel_circ_0007036 | - | ENSG00000197813;      | CVB5_5Y3 |
| novel_circ_0007150 | + | ENSG00000099783;      | CVB5_5Y3 |
| novel_circ_0006386 | + | ENSG00000101596;      | CVB5_5Y3 |
| novel_circ_0006436 | - | ENSG00000078043;      | CVB5_5Y3 |
| novel_circ_0009895 | + | ENSG00000196236;      | CVB5_5Y3 |
| novel_circ_0009898 | + | ENSG00000100393;      | CVB5_5Y3 |
| novel_circ_0009089 | + | ENSG00000132664;      | CVB5_5Y3 |
| novel_circ_0009281 | + | ENSG00000125779;      | CVB5_5Y3 |
| novel_circ_0009289 | + | ENSG00000198900;      | CVB5_5Y3 |
| novel_circ_0009354 | + | ENSG00000124207;      | CVB5_5Y3 |
| novel_circ_0009392 | - | ENSG00000000419;      | CVB5_5Y3 |
| novel_circ_0009481 | + | ENSG00000182621;      | CVB5_5Y3 |
| novel_circ_0009521 | - | ENSG00000156299;      | CVB5_5Y3 |
| novel_circ_0009537 | - | ENSG00000142207;      | CVB5_5Y3 |
| novel_circ_0009576 | + | ENSG00000159256;      | CVB5_5Y3 |
| novel_circ_0009633 | + | ENSG00000285815;ENSG0 | CVB5_5Y3 |
| novel_circ_0009650 | + | ENSG00000160218;      | CVB5_5Y3 |
| novel_circ_0009658 | + | ENSG00000197381;      | CVB5_5Y3 |
| novel_circ_0015973 | - | ENSG00000106344;      | CVB5_5Y3 |
| novel_circ_0015989 | + | ENSG00000158467;      | CVB5_5Y3 |
| novel_circ_0016049 | + | ENSG00000157741;      | CVB5_5Y3 |
| novel_circ_0016072 | - | ENSG00000157764;      | CVB5_5Y3 |
| novel_circ_0016291 | + | ENSG00000105926;      | CVB5_5Y3 |
| novel_circ_0016460 | + | ENSG00000132434;      | CVB5_5Y3 |
| novel_circ_0016594 | - | ENSG00000009954;      | CVB5_5Y3 |
| novel_circ_0016604 | + | ENSG00000164818;      | CVB5_5Y3 |
| novel_circ_0014924 | - | n/a                   | CVB5_5Y3 |
| novel_circ_0014956 | + | ENSG00000111845;      | CVB5_5Y3 |
| novel_circ_0014975 | + | ENSG00000272162;ENSG0 | CVB5_5Y3 |
| novel_circ_0015025 | - | ENSG00000111885;      | CVB5_5Y3 |
| novel_circ_0015296 | - | ENSG00000130363;      | CVB5_5Y3 |
| novel_circ_0015454 | + | ENSG00000096433;      | CVB5_5Y3 |
| novel_circ_0015564 | - | ENSG00000112118;      | CVB5_5Y3 |
| novel_circ_0015703 | - | ENSG00000005700;      | CVB5_5Y3 |
| novel_circ_0015710 | - | ENSG00000118420;      | CVB5_5Y3 |
| novel_circ_0015715 | + | ENSG00000083097;      | CVB5_5Y3 |
| novel_circ_0014093 | + | ENSG00000064651;      | CVB5_5Y3 |
| novel_circ_0014118 | - | ENSG00000131437;      | CVB5_5Y3 |
| novel_circ_0014157 | + | ENSG00000145833;      | CVB5_5Y3 |

|                    |   |                       |          |
|--------------------|---|-----------------------|----------|
| novel_circ_0014198 | - | ENSG00000113013;      | CVB5_5Y3 |
| novel_circ_0014378 | + | ENSG00000113643;      | CVB5_5Y3 |
| novel_circ_0014388 | + | ENSG00000204764;      | CVB5_5Y3 |
| novel_circ_0014464 | - | ENSG00000131459;      | CVB5_5Y3 |
| novel_circ_0014499 | + | ENSG00000113407;      | CVB5_5Y3 |
| novel_circ_0014767 | + | ENSG00000164252;ENSG0 | CVB5_5Y3 |
| novel_circ_0013253 | + | ENSG00000164134;      | CVB5_5Y3 |
| novel_circ_0013292 | + | ENSG00000071205;      | CVB5_5Y3 |
| novel_circ_0013341 | - | ENSG00000198589;      | CVB5_5Y3 |
| novel_circ_0013439 | - | ENSG00000163950;      | CVB5_5Y3 |
| novel_circ_0013486 | + | ENSG00000205129;      | CVB5_5Y3 |
| novel_circ_0013568 | + | ENSG00000125386;      | CVB5_5Y3 |
| novel_circ_0013753 | + | ENSG00000090989;      | CVB5_5Y3 |
| novel_circ_0013837 | - | ENSG00000118816;      | CVB5_5Y3 |
| novel_circ_0013919 | - | ENSG00000138640;      | CVB5_5Y3 |
| novel_circ_0011879 | + | ENSG00000153767;      | CVB5_5Y3 |
| novel_circ_0011934 | - | ENSG00000163848;      | CVB5_5Y3 |
| novel_circ_0011979 | - | ENSG00000114656;      | CVB5_5Y3 |
| novel_circ_0012031 | + | ENSG00000114054;      | CVB5_5Y3 |
| novel_circ_0012090 | + | ENSG00000069849;      | CVB5_5Y3 |
| novel_circ_0012118 | + | ENSG00000131379;      | CVB5_5Y3 |
| novel_circ_0012161 | + | ENSG00000131375;      | CVB5_5Y3 |
| novel_circ_0012209 | - | ENSG00000068885;ENSG0 | CVB5_5Y3 |
| novel_circ_0012333 | - | ENSG00000043093;      | CVB5_5Y3 |
| novel_circ_0012427 | - | ENSG00000114331;      | CVB5_5Y3 |
| novel_circ_0012439 | - | ENSG00000286168;      | CVB5_5Y3 |
| novel_circ_0012586 | + | ENSG00000153551;      | CVB5_5Y3 |
| novel_circ_0012991 | - | ENSG00000172340;      | CVB5_5Y3 |
| novel_circ_0010029 | - | ENSG00000115758;      | CVB5_5Y3 |
| novel_circ_0010095 | + | ENSG00000188177;      | CVB5_5Y3 |
| novel_circ_0010263 | + | ENSG00000080345;      | CVB5_5Y3 |
| novel_circ_0010272 | - | ENSG00000151779;      | CVB5_5Y3 |
| novel_circ_0010284 | - | ENSG00000196504;      | CVB5_5Y3 |
| novel_circ_0010568 | + | ENSG00000196950;      | CVB5_5Y3 |
| novel_circ_0010612 | - | ENSG00000115942;      | CVB5_5Y3 |
| novel_circ_0010664 | - | ENSG00000055917;      | CVB5_5Y3 |
| novel_circ_0010672 | + | ENSG00000138443;      | CVB5_5Y3 |
| novel_circ_0010801 | + | n/a                   | CVB5_5Y3 |
| novel_circ_0010844 | + | ENSG00000168958;      | CVB5_5Y3 |
| novel_circ_0010859 | - | ENSG00000035115;      | CVB5_5Y3 |
| novel_circ_0010860 | - | ENSG00000163053;      | CVB5_5Y3 |
| novel_circ_0010870 | + | ENSG00000135932;      | CVB5_5Y3 |
| novel_circ_0010957 | - | ENSG00000130414;      | CVB5_5Y3 |
| novel_circ_0010994 | - | ENSG00000198399;      | CVB5_5Y3 |
| novel_circ_0011036 | - | ENSG00000138002;      | CVB5_5Y3 |
| novel_circ_0011614 | + | ENSG00000124356;      | CVB5_5Y3 |
| novel_circ_0011623 | - | ENSG00000114993;      | CVB5_5Y3 |
| novel_circ_0011670 | - | ENSG00000172086;      | CVB5_5Y3 |
| novel_circ_0011671 | - | ENSG00000134313;      | CVB5_5Y3 |
| novel_circ_0007209 | + | ENSG00000116266;      | CVB5_5Y3 |
| novel_circ_0007221 | - | ENSG00000134222;      | CVB5_5Y3 |
| novel_circ_0007226 | + | n/a                   | CVB5_5Y3 |
| novel_circ_0007488 | - | ENSG00000160075;      | CVB5_5Y3 |
| novel_circ_0007540 | + | ENSG00000143179;      | CVB5_5Y3 |
| novel_circ_0007636 | + | ENSG00000152061;      | CVB5_5Y3 |
| novel_circ_0007662 | - | ENSG00000008130;      | CVB5_5Y3 |
| novel_circ_0007801 | - | ENSG00000118193;      | CVB5_5Y3 |
| novel_circ_0007843 | + | ENSG00000198625;      | CVB5_5Y3 |

|                    |   |                       |                  |
|--------------------|---|-----------------------|------------------|
| novel_circ_0007845 | - | ENSG00000133059;      | CVB5_5Y3         |
| novel_circ_0007882 | - | ENSG00000196878;      | CVB5_5Y3         |
| novel_circ_0007912 | + | ENSG00000162772;      | CVB5_5Y3         |
| novel_circ_0007938 | + | ENSG00000067606;      | CVB5_5Y3         |
| novel_circ_0007969 | - | ENSG00000196660;      | CVB5_5Y3         |
| novel_circ_0008126 | + | ENSG00000270106;ENSG0 | CVB5_5Y3         |
| novel_circ_0008174 | - | ENSG00000054267;      | CVB5_5Y3         |
| novel_circ_0008281 | + | ENSG00000162852;      | CVB5_5Y3         |
| novel_circ_0008292 | - | ENSG00000020633;      | CVB5_5Y3         |
| novel_circ_0008346 | - | ENSG00000116350;      | CVB5_5Y3         |
| novel_circ_0008412 | - | ENSG00000116525;      | CVB5_5Y3         |
| novel_circ_0008420 | + | ENSG00000197056;      | CVB5_5Y3         |
| novel_circ_0008996 | + | ENSG00000122483;      | CVB5_5Y3         |
| novel_circ_0017773 | + | ENSG00000106701;      | CVB5_5Y3         |
| novel_circ_0017879 | - | ENSG00000119402;      | CVB5_5Y3         |
| novel_circ_0017885 | + | ENSG00000119397;      | CVB5_5Y3         |
| novel_circ_0017916 | + | ENSG00000011454;      | CVB5_5Y3         |
| novel_circ_0018027 | + | ENSG00000130723;      | CVB5_5Y3         |
| novel_circ_0018047 | - | ENSG00000125485;      | CVB5_5Y3         |
| novel_circ_0018060 | + | ENSG00000196363;      | CVB5_5Y3         |
| novel_circ_0018077 | - | ENSG00000130560;      | CVB5_5Y3         |
| novel_circ_0018156 | + | ENSG00000188352;      | CVB5_5Y3         |
| novel_circ_0018194 | - | ENSG00000120159;      | CVB5_5Y3         |
| novel_circ_0016913 | - | ENSG00000064313;      | CVB5_5Y3         |
| novel_circ_0016996 | + | ENSG00000249859;      | CVB5_5Y3         |
| novel_circ_0017127 | + | ENSG00000105339;      | CVB5_5Y3         |
| novel_circ_0017376 | + | ENSG00000165102;      | CVB5_5Y3         |
| novel_circ_0017531 | - | ENSG00000066777;      | CVB5_5Y3         |
| novel_circ_0017536 | + | ENSG00000155189;      | CVB5_5Y3         |
| hsa_circ_0001931   | - | ENSG00000085224;      | CVB5_5Y3,Con_5Y1 |
| hsa_circ_0028090   | - | ENSG00000084112;      | CVB5_5Y3,Con_5Y1 |
| hsa_circ_0029531   | - | ENSG00000177084;      | CVB5_5Y3,Con_5Y1 |
| hsa_circ_0025006   | + | ENSG00000006831;      | CVB5_5Y3,Con_5Y1 |
| hsa_circ_0001964   | + | ENSG00000029153;      | CVB5_5Y3,Con_5Y1 |
| hsa_circ_0020671   | + | ENSG00000070047;      | CVB5_5Y3,Con_5Y1 |
| hsa_circ_0003417   | + | ENSG00000141279;      | CVB5_5Y3,Con_5Y1 |
| hsa_circ_0004510   | - | ENSG00000188603;ENSG0 | CVB5_5Y3,Con_5Y1 |
| hsa_circ_0006601   | - | ENSG00000179151;      | CVB5_5Y3,Con_5Y1 |
| hsa_circ_0003333   | + | ENSG00000140563;      | CVB5_5Y3,Con_5Y1 |
| hsa_circ_0005412   | + | ENSG00000127616;      | CVB5_5Y3,Con_5Y1 |
| hsa_circ_0049375   | + | ENSG00000127616;      | CVB5_5Y3,Con_5Y1 |
| hsa_circ_0004163   | + | ENSG00000176890;      | CVB5_5Y3,Con_5Y1 |
| hsa_circ_0002799   | + | ENSG00000130856;      | CVB5_5Y3,Con_5Y1 |
| hsa_circ_0006002   | - | ENSG00000122490;      | CVB5_5Y3,Con_5Y1 |
| hsa_circ_0063623   | + | ENSG00000198911;      | CVB5_5Y3,Con_5Y1 |
| hsa_circ_0063816   | - | ENSG00000075275;      | CVB5_5Y3,Con_5Y1 |
| hsa_circ_0060522   | + | ENSG00000101109;      | CVB5_5Y3,Con_5Y1 |
| hsa_circ_0061491   | - | ENSG00000159086;      | CVB5_5Y3,Con_5Y1 |
| hsa_circ_0005592   | + | ENSG00000284461;ENSG0 | CVB5_5Y3,Con_5Y1 |
| hsa_circ_0001726   | - | ENSG00000198556;ENSG0 | CVB5_5Y3,Con_5Y1 |
| hsa_circ_0070236   | - | ENSG00000138674;      | CVB5_5Y3,Con_5Y1 |
| hsa_circ_0064222   | + | ENSG00000144554;      | CVB5_5Y3,Con_5Y1 |
| hsa_circ_0002580   | + | ENSG00000174738;      | CVB5_5Y3,Con_5Y1 |
| hsa_circ_0064696   | + | ENSG00000182973;      | CVB5_5Y3,Con_5Y1 |
| hsa_circ_0065394   | - | ENSG00000114268;      | CVB5_5Y3,Con_5Y1 |
| hsa_circ_0004955   | - | ENSG00000115170;      | CVB5_5Y3,Con_5Y1 |
| hsa_circ_0004575   | + | ENSG00000116117;      | CVB5_5Y3,Con_5Y1 |
| hsa_circ_0003478   | + | ENSG00000068724;      | CVB5_5Y3,Con_5Y1 |

|                    |   |                       |                   |
|--------------------|---|-----------------------|-------------------|
| hsa_circ_0054861   | - | ENSG00000082898;      | CVB5_5Y3,Con_5Y1  |
| hsa_circ_0016969   | - | ENSG00000135749;      | CVB5_5Y3,Con_5Y1  |
| hsa_circ_0006164   | - | ENSG00000043514;      | CVB5_5Y3,Con_5Y1  |
| hsa_circ_0089417   | + | ENSG00000186350;      | CVB5_5Y3,Con_5Y1  |
| hsa_circ_0007816   | + | ENSG00000147854;      | CVB5_5Y3,Con_5Y1  |
| hsa_circ_0004605   | - | ENSG00000130958;ENSG0 | CVB5_5Y3,Con_5Y1  |
| novel_circ_0002034 | + | ENSG00000174989;      | CVB5_5Y3,Con_5Y1  |
| novel_circ_0002317 | + | ENSG00000111203;      | CVB5_5Y3,Con_5Y1  |
| novel_circ_0002659 | - | ENSG00000133858;      | CVB5_5Y3,Con_5Y1  |
| novel_circ_0001122 | + | ENSG00000167257;      | CVB5_5Y3,Con_5Y1  |
| novel_circ_0001705 | - | ENSG00000130413;      | CVB5_5Y3,Con_5Y1  |
| novel_circ_0000269 | - | ENSG00000182022;      | CVB5_5Y3,Con_5Y1  |
| novel_circ_0004935 | - | ENSG00000159461;      | CVB5_5Y3,Con_5Y1  |
| novel_circ_0004965 | + | ENSG00000067955;      | CVB5_5Y3,Con_5Y1  |
| novel_circ_0005187 | + | ENSG00000158545;      | CVB5_5Y3,Con_5Y1  |
| novel_circ_0003992 | - | ENSG00000128731;      | CVB5_5Y3,Con_5Y1  |
| novel_circ_0003461 | - | ENSG00000092148;      | CVB5_5Y3,Con_5Y1  |
| novel_circ_0003547 | - | ENSG00000100479;      | CVB5_5Y3,Con_5Y1  |
| novel_circ_0003791 | + | ENSG00000119596;      | CVB5_5Y3,Con_5Y1  |
| novel_circ_0009768 | - | ENSG00000180957;      | CVB5_5Y3,Con_5Y1  |
| novel_circ_0009933 | - | ENSG00000100304;      | CVB5_5Y3,Con_5Y1  |
| novel_circ_0009948 | + | ENSG00000100376;      | CVB5_5Y3,Con_5Y1  |
| novel_circ_0009268 | + | ENSG00000088888;      | CVB5_5Y3,Con_5Y1  |
| novel_circ_0016046 | - | ENSG00000146858;      | CVB5_5Y3,Con_5Y1  |
| novel_circ_0015121 | + | ENSG00000124523;      | CVB5_5Y3,Con_5Y1  |
| novel_circ_0015446 | - | ENSG00000213676;      | CVB5_5Y3,Con_5Y1  |
| novel_circ_0014067 | + | ENSG00000151292;      | CVB5_5Y3,Con_5Y1  |
| novel_circ_0014183 | - | ENSG00000031003;      | CVB5_5Y3,Con_5Y1  |
| novel_circ_0014677 | + | ENSG00000123213;      | CVB5_5Y3,Con_5Y1  |
| novel_circ_0014899 | + | ENSG00000164292;      | CVB5_5Y3,Con_5Y1  |
| novel_circ_0012127 | - | ENSG00000018408;      | CVB5_5Y3,Con_5Y1  |
| novel_circ_0012492 | + | ENSG00000122068;      | CVB5_5Y3,Con_5Y1  |
| novel_circ_0011071 | + | ENSG00000163811;      | CVB5_5Y3,Con_5Y1  |
| novel_circ_0011117 | + | ENSG00000115760;      | CVB5_5Y3,Con_5Y1  |
| novel_circ_0007427 | - | ENSG00000116539;      | CVB5_5Y3,Con_5Y1  |
| novel_circ_0007799 | + | ENSG00000169914;      | CVB5_5Y3,Con_5Y1  |
| novel_circ_0007864 | - | ENSG00000127483;      | CVB5_5Y3,Con_5Y1  |
| novel_circ_0018340 | + | ENSG00000120158;      | CVB5_5Y3,Con_5Y1  |
| novel_circ_0017629 | + | ENSG00000147606;      | CVB5_5Y3,Con_5Y1  |
| novel_circ_0017710 | + | ENSG00000104356;      | CVB5_5Y3,Con_5Y1  |
| hsa_circ_0004851   | + | ENSG00000135387;      | CVB5_5Y3,Con_5Y1, |
| hsa_circ_0000349   | + | ENSG00000042429;ENSG0 | CVB5_5Y3,Con_5Y1, |
| hsa_circ_0008456   | - | ENSG00000189319;ENSG0 | CVB5_5Y3,Con_5Y1, |
| hsa_circ_0043184   | + | ENSG00000278311;      | CVB5_5Y3,Con_5Y1, |
| hsa_circ_0005287   | + | ENSG00000189149;      | CVB5_5Y3,Con_5Y1, |
| hsa_circ_0039783   | + | ENSG00000067955;      | CVB5_5Y3,Con_5Y1, |
| hsa_circ_0040264   | + | ENSG00000189091;      | CVB5_5Y3,Con_5Y1, |
| hsa_circ_0004172   | - | ENSG00000168411;      | CVB5_5Y3,Con_5Y1, |
| hsa_circ_0006945   | + | ENSG00000158805;      | CVB5_5Y3,Con_5Y1, |
| hsa_circ_0004137   | - | ENSG00000100461;      | CVB5_5Y3,Con_5Y1, |
| hsa_circ_0031431   | + | ENSG00000100473;      | CVB5_5Y3,Con_5Y1, |
| hsa_circ_0003305   | + | ENSG00000100731;      | CVB5_5Y3,Con_5Y1, |
| hsa_circ_0002143   | - | ENSG00000100596;      | CVB5_5Y3,Con_5Y1, |
| hsa_circ_0059481   | - | ENSG00000089177;      | CVB5_5Y3,Con_5Y1, |
| hsa_circ_0079294   | - | ENSG00000011275;      | CVB5_5Y3,Con_5Y1, |
| hsa_circ_0007281   | - | ENSG00000136240;      | CVB5_5Y3,Con_5Y1, |
| hsa_circ_0076254   | - | ENSG00000183826;      | CVB5_5Y3,Con_5Y1, |
| hsa_circ_0005949   | - | ENSG00000168916;      | CVB5_5Y3,Con_5Y1, |

|                    |   |                       |                   |
|--------------------|---|-----------------------|-------------------|
| hsa_circ_0008089   | - | ENSG00000164253;      | CVB5_5Y3,Con_5Y1, |
| hsa_circ_0071197   | - | ENSG00000198589;      | CVB5_5Y3,Con_5Y1, |
| hsa_circ_0068958   | - | ENSG00000087269;      | CVB5_5Y3,Con_5Y1, |
| hsa_circ_0002962   | - | ENSG00000163812;      | CVB5_5Y3,Con_5Y1, |
| hsa_circ_0055514   | - | ENSG00000132305;      | CVB5_5Y3,Con_5Y1, |
| hsa_circ_0008936   | - | ENSG00000160049;      | CVB5_5Y3,Con_5Y1, |
| hsa_circ_0004717   | + | ENSG00000143569;      | CVB5_5Y3,Con_5Y1, |
| hsa_circ_0002898   | + | ENSG00000116138;      | CVB5_5Y3,Con_5Y1, |
| hsa_circ_0000137   | - | ENSG00000116539;      | CVB5_5Y3,Con_5Y1, |
| hsa_circ_0011588   | - | ENSG00000092853;      | CVB5_5Y3,Con_5Y1, |
| hsa_circ_0012545   | - | ENSG00000134744;      | CVB5_5Y3,Con_5Y1, |
| hsa_circ_0087564   | + | ENSG00000175787;      | CVB5_5Y3,Con_5Y1, |
| novel_circ_0002760 | - | ENSG00000173588;      | CVB5_5Y3,Con_5Y1, |
| novel_circ_0000098 | - | ENSG00000119953;      | CVB5_5Y3,Con_5Y1, |
| novel_circ_0005019 | - | ENSG00000102908;      | CVB5_5Y3,Con_5Y1, |
| novel_circ_0005235 | + | ENSG00000141002;      | CVB5_5Y3,Con_5Y1, |
| novel_circ_0003994 | - | ENSG00000104067;      | CVB5_5Y3,Con_5Y1, |
| novel_circ_0004466 | + | ENSG00000140403;      | CVB5_5Y3,Con_5Y1, |
| novel_circ_0003751 | + | ENSG00000197555;      | CVB5_5Y3,Con_5Y1, |
| novel_circ_0007064 | - | ENSG00000161551;      | CVB5_5Y3,Con_5Y1, |
| novel_circ_0011993 | - | ENSG00000172765;      | CVB5_5Y3,Con_5Y1, |
| novel_circ_0012053 | - | ENSG00000118007;      | CVB5_5Y3,Con_5Y1, |
| novel_circ_0011666 | - | ENSG00000115561;      | CVB5_5Y3,Con_5Y1, |
| novel_circ_0007406 | - | ENSG00000143614;      | CVB5_5Y3,Con_5Y1, |
| novel_circ_0008932 | + | ENSG00000097033;      | CVB5_5Y3,Con_5Y1, |
| novel_circ_0018215 | + | ENSG00000086061;      | CVB5_5Y3,Con_5Y1, |
| hsa_circ_0008399   | + | ENSG00000102317;      | CVB5_5Y3,Con_5Y1, |
| hsa_circ_0003040   | + | ENSG00000182957;      | CVB5_5Y3,Con_5Y1, |
| hsa_circ_0030704   | - | ENSG00000102572;      | CVB5_5Y3,Con_5Y1, |
| hsa_circ_0002881   | - | ENSG00000073614;      | CVB5_5Y3,Con_5Y1, |
| hsa_circ_0024402   | + | ENSG00000167257;      | CVB5_5Y3,Con_5Y1, |
| hsa_circ_0000339   | - | ENSG00000175582;      | CVB5_5Y3,Con_5Y1, |
| hsa_circ_0007242   | + | ENSG00000123240;      | CVB5_5Y3,Con_5Y1, |
| hsa_circ_0003508   | - | ENSG00000186566;      | CVB5_5Y3,Con_5Y1, |
| hsa_circ_0008284   | + | ENSG00000103319;      | CVB5_5Y3,Con_5Y1, |
| hsa_circ_0005217   | + | ENSG00000197912;      | CVB5_5Y3,Con_5Y1, |
| hsa_circ_0000657   | + | ENSG00000140563;      | CVB5_5Y3,Con_5Y1, |
| hsa_circ_0049398   | + | ENSG00000130164;      | CVB5_5Y3,Con_5Y1, |
| hsa_circ_0083012   | - | ENSG00000055609;      | CVB5_5Y3,Con_5Y1, |
| hsa_circ_0079492   | + | ENSG00000136261;      | CVB5_5Y3,Con_5Y1, |
| hsa_circ_0077717   | + | ENSG00000164465;      | CVB5_5Y3,Con_5Y1, |
| hsa_circ_0005820   | - | ENSG00000135316;      | CVB5_5Y3,Con_5Y1, |
| hsa_circ_0002449   | + | ENSG00000120306;      | CVB5_5Y3,Con_5Y1, |
| hsa_circ_0008839   | + | ENSG00000114354;      | CVB5_5Y3,Con_5Y1, |
| hsa_circ_0007348   | + | ENSG00000114098;      | CVB5_5Y3,Con_5Y1, |
| hsa_circ_0064555   | - | ENSG00000182568;      | CVB5_5Y3,Con_5Y1, |
| hsa_circ_0002912   | + | ENSG00000163808;      | CVB5_5Y3,Con_5Y1, |
| hsa_circ_0057173   | + | ENSG00000018510;      | CVB5_5Y3,Con_5Y1, |
| hsa_circ_0004164   | - | ENSG00000176946;      | CVB5_5Y3,Con_5Y1, |
| hsa_circ_0007608   | - | ENSG00000116539;      | CVB5_5Y3,Con_5Y1, |
| hsa_circ_0016115   | + | ENSG00000058673;ENSG0 | CVB5_5Y3,Con_5Y1, |
| hsa_circ_0011572   | - | ENSG00000142687;      | CVB5_5Y3,Con_5Y1, |
| hsa_circ_0005246   | - | ENSG00000117419;      | CVB5_5Y3,Con_5Y1, |
| hsa_circ_0089392   | - | ENSG00000160293;      | CVB5_5Y3,Con_5Y1, |
| hsa_circ_0008678   | + | ENSG00000188352;      | CVB5_5Y3,Con_5Y1, |
| hsa_circ_0086242   | - | ENSG00000080298;      | CVB5_5Y3,Con_5Y1, |
| hsa_circ_0006728   | + | ENSG00000086102;      | CVB5_5Y3,Con_5Y1, |
| hsa_circ_0087255   | + | ENSG00000197969;      | CVB5_5Y3,Con_5Y1, |

|                    |   |                       |                   |
|--------------------|---|-----------------------|-------------------|
| hsa_circ_0006586   | + | ENSG00000168522;ENSG0 | CVB5_5Y3,Con_5Y1, |
| novel_circ_0002936 | - | ENSG00000151849;      | CVB5_5Y3,Con_5Y1, |
| novel_circ_0006041 | + | ENSG00000181222;      | CVB5_5Y3,Con_5Y1, |
| novel_circ_0006615 | + | ENSG00000168502;      | CVB5_5Y3,Con_5Y1, |
| novel_circ_0009247 | - | ENSG00000080839;      | CVB5_5Y3,Con_5Y1, |
| novel_circ_0015597 | + | n/a                   | CVB5_5Y3,Con_5Y1, |
| novel_circ_0012045 | - | ENSG00000118007;      | CVB5_5Y3,Con_5Y1, |
| novel_circ_0012581 | + | ENSG00000153551;      | CVB5_5Y3,Con_5Y1, |
| novel_circ_0008423 | - | ENSG00000116560;      | CVB5_5Y3,Con_5Y1, |
| hsa_circ_0029693   | - | ENSG00000150457;      | CVB5_5Y3,Con_5Y1, |
| hsa_circ_0051450   | + | ENSG00000007047;      | CVB5_5Y3,Con_5Y1, |
| hsa_circ_0069320   | - | ENSG00000152990;      | CVB5_5Y3,Con_5Y1, |
| hsa_circ_0069795   | - | ENSG00000134852;      | CVB5_5Y3,Con_5Y1, |
| hsa_circ_0070113   | + | ENSG00000138759;      | CVB5_5Y3,Con_5Y1, |
| hsa_circ_0004086   | - | ENSG00000173905;      | CVB5_5Y3,Con_5Y1, |
| hsa_circ_0065635   | - | ENSG00000114316;      | CVB5_5Y3,Con_5Y1, |
| hsa_circ_0057657   | + | ENSG00000115520;      | CVB5_5Y3,Con_5Y1, |
| hsa_circ_0005853   | - | ENSG00000286239;ENSG0 | CVB5_5Y3,Con_5Y1, |
| hsa_circ_0007439   | + | ENSG00000213639;ENSG0 | CVB5_5Y3,Con_5Y1, |
| hsa_circ_0015207   | + | ENSG00000117523;      | CVB5_5Y3,Con_5Y1, |
| hsa_circ_0013084   | + | ENSG00000097033;      | CVB5_5Y3,Con_5Y1, |
| hsa_circ_0089197   | + | ENSG00000130723;      | CVB5_5Y3,Con_5Y1, |
| novel_circ_0002068 | + | ENSG00000022840;      | CVB5_5Y3,Con_5Y1, |
| novel_circ_0001428 | - | ENSG00000175216;      | CVB5_5Y3,Con_5Y1, |
| novel_circ_0005703 | + | ENSG00000159202;      | CVB5_5Y3,Con_5Y1, |
| novel_circ_0009118 | + | ENSG00000101003;      | CVB5_5Y3,Con_5Y1, |
| novel_circ_0014717 | + | ENSG00000145734;      | CVB5_5Y3,Con_5Y1, |
| novel_circ_0013166 | - | ENSG00000159692;      | CVB5_5Y3,Con_5Y1, |
| novel_circ_0013363 | - | ENSG00000109670;      | CVB5_5Y3,Con_5Y1, |
| novel_circ_0010673 | + | ENSG00000138443;      | CVB5_5Y3,Con_5Y1, |
| novel_circ_0010771 | + | n/a                   | CVB5_5Y3,Con_5Y1, |
| novel_circ_0011539 | - | ENSG00000273398;ENSG0 | CVB5_5Y3,Con_5Y1, |
| novel_circ_0008962 | + | ENSG00000189195;      | CVB5_5Y3,Con_5Y1, |
| hsa_circ_0091459   | + | ENSG00000101972;      | CVB5_5Y3,Con_5Y2  |
| hsa_circ_0003587   | - | ENSG00000102781;      | CVB5_5Y3,Con_5Y2  |
| hsa_circ_0007007   | - | ENSG00000110880;      | CVB5_5Y3,Con_5Y2  |
| hsa_circ_0028088   | - | ENSG00000084112;      | CVB5_5Y3,Con_5Y2  |
| hsa_circ_0005916   | + | ENSG00000174989;      | CVB5_5Y3,Con_5Y2  |
| hsa_circ_0025836   | + | ENSG00000174718;      | CVB5_5Y3,Con_5Y2  |
| hsa_circ_0024271   | - | ENSG00000137713;      | CVB5_5Y3,Con_5Y2  |
| hsa_circ_0003307   | + | ENSG00000177156;      | CVB5_5Y3,Con_5Y2  |
| hsa_circ_0019664   | - | ENSG00000198728;      | CVB5_5Y3,Con_5Y2  |
| hsa_circ_0000268   | + | ENSG00000019995;      | CVB5_5Y3,Con_5Y2  |
| hsa_circ_0017856   | - | ENSG00000148484;      | CVB5_5Y3,Con_5Y2  |
| hsa_circ_0017510   | - | ENSG00000107959;      | CVB5_5Y3,Con_5Y2  |
| hsa_circ_0002758   | + | ENSG00000099282;      | CVB5_5Y3,Con_5Y2  |
| hsa_circ_0005565   | + | ENSG00000010244;      | CVB5_5Y3,Con_5Y2  |
| hsa_circ_0043278   | + | ENSG00000276234;      | CVB5_5Y3,Con_5Y2  |
| hsa_circ_0043954   | - | ENSG00000012048;      | CVB5_5Y3,Con_5Y2  |
| hsa_circ_0004796   | + | ENSG00000108424;      | CVB5_5Y3,Con_5Y2  |
| hsa_circ_0045310   | + | ENSG00000258890;      | CVB5_5Y3,Con_5Y2  |
| hsa_circ_0045714   | + | ENSG00000132478;      | CVB5_5Y3,Con_5Y2  |
| hsa_circ_0000709   | + | ENSG00000102974;      | CVB5_5Y3,Con_5Y2  |
| hsa_circ_0000714   | - | ENSG00000090861;      | CVB5_5Y3,Con_5Y2  |
| hsa_circ_0005417   | - | ENSG00000128881;      | CVB5_5Y3,Con_5Y2  |
| hsa_circ_0035873   | - | ENSG00000090487;      | CVB5_5Y3,Con_5Y2  |
| hsa_circ_0033614   | + | ENSG00000182979;      | CVB5_5Y3,Con_5Y2  |
| hsa_circ_0002012   | + | ENSG00000020577;      | CVB5_5Y3,Con_5Y2  |

|                    |   |                       |                  |
|--------------------|---|-----------------------|------------------|
| hsa_circ_0049329   | + | ENSG00000079805;      | CVB5_5Y3,Con_5Y2 |
| hsa_circ_0005660   | + | ENSG00000008441;      | CVB5_5Y3,Con_5Y2 |
| hsa_circ_0008299   | - | ENSG00000186111;      | CVB5_5Y3,Con_5Y2 |
| hsa_circ_0002403   | + | ENSG00000168234;      | CVB5_5Y3,Con_5Y2 |
| hsa_circ_0063300   | - | ENSG00000283900;ENSG0 | CVB5_5Y3,Con_5Y2 |
| hsa_circ_0063408   | + | ENSG00000100354;      | CVB5_5Y3,Con_5Y2 |
| hsa_circ_0081839   | - | ENSG00000091127;      | CVB5_5Y3,Con_5Y2 |
| hsa_circ_0081872   | - | ENSG00000008282;      | CVB5_5Y3,Con_5Y2 |
| hsa_circ_0082333   | + | ENSG00000128607;      | CVB5_5Y3,Con_5Y2 |
| hsa_circ_0080849   | + | ENSG00000127947;      | CVB5_5Y3,Con_5Y2 |
| hsa_circ_0006554   | - | ENSG00000197442;      | CVB5_5Y3,Con_5Y2 |
| hsa_circ_0077276   | - | ENSG00000146282;      | CVB5_5Y3,Con_5Y2 |
| hsa_circ_0073761   | + | ENSG00000064651;      | CVB5_5Y3,Con_5Y2 |
| hsa_circ_0003989   | + | ENSG00000038382;      | CVB5_5Y3,Con_5Y2 |
| hsa_circ_0003227   | - | ENSG00000113569;      | CVB5_5Y3,Con_5Y2 |
| hsa_circ_0008243   | + | ENSG00000071205;      | CVB5_5Y3,Con_5Y2 |
| hsa_circ_0058763   | + | ENSG00000077044;      | CVB5_5Y3,Con_5Y2 |
| hsa_circ_0000115   | - | ENSG00000009307;      | CVB5_5Y3,Con_5Y2 |
| hsa_circ_0006575   | - | ENSG00000143622;      | CVB5_5Y3,Con_5Y2 |
| hsa_circ_0005357   | - | ENSG00000143207;      | CVB5_5Y3,Con_5Y2 |
| hsa_circ_0005356   | + | ENSG00000176393;      | CVB5_5Y3,Con_5Y2 |
| hsa_circ_0016519   | + | ENSG00000116141;      | CVB5_5Y3,Con_5Y2 |
| hsa_circ_0011174   | + | ENSG00000159023;      | CVB5_5Y3,Con_5Y2 |
| hsa_circ_0088153   | + | ENSG00000138835;      | CVB5_5Y3,Con_5Y2 |
| hsa_circ_0003782   | + | ENSG00000188352;      | CVB5_5Y3,Con_5Y2 |
| hsa_circ_0004982   | - | ENSG00000155096;      | CVB5_5Y3,Con_5Y2 |
| hsa_circ_0004759   | - | ENSG00000147687;      | CVB5_5Y3,Con_5Y2 |
| hsa_circ_0083905   | - | ENSG00000172728;      | CVB5_5Y3,Con_5Y2 |
| hsa_circ_0083964   | + | ENSG00000129691;      | CVB5_5Y3,Con_5Y2 |
| hsa_circ_0001802   | - | ENSG00000168300;      | CVB5_5Y3,Con_5Y2 |
| hsa_circ_0008736   | - | ENSG00000104714;      | CVB5_5Y3,Con_5Y2 |
| hsa_circ_0084974   | + | ENSG00000156471;      | CVB5_5Y3,Con_5Y2 |
| novel_circ_0002856 | + | ENSG00000130177;      | CVB5_5Y3,Con_5Y2 |
| novel_circ_0001887 | + | ENSG00000082805;      | CVB5_5Y3,Con_5Y2 |
| novel_circ_0002634 | + | n/a                   | CVB5_5Y3,Con_5Y2 |
| novel_circ_0001322 | + | ENSG00000060749;      | CVB5_5Y3,Con_5Y2 |
| novel_circ_0001469 | + | ENSG00000070047;      | CVB5_5Y3,Con_5Y2 |
| novel_circ_0000265 | + | ENSG00000151465;      | CVB5_5Y3,Con_5Y2 |
| novel_circ_0005838 | + | ENSG00000062716;      | CVB5_5Y3,Con_5Y2 |
| novel_circ_0006052 | + | ENSG00000073350;      | CVB5_5Y3,Con_5Y2 |
| novel_circ_0005090 | - | ENSG00000090863;      | CVB5_5Y3,Con_5Y2 |
| novel_circ_0005118 | - | ENSG00000065457;      | CVB5_5Y3,Con_5Y2 |
| novel_circ_0003768 | + | ENSG00000080815;      | CVB5_5Y3,Con_5Y2 |
| novel_circ_0006909 | + | ENSG00000105738;      | CVB5_5Y3,Con_5Y2 |
| novel_circ_0007047 | + | ENSG00000104960;      | CVB5_5Y3,Con_5Y2 |
| novel_circ_0006385 | + | ENSG00000101596;      | CVB5_5Y3,Con_5Y2 |
| novel_circ_0009981 | + | ENSG00000054611;      | CVB5_5Y3,Con_5Y2 |
| novel_circ_0009409 | - | ENSG00000019186;      | CVB5_5Y3,Con_5Y2 |
| novel_circ_0009637 | + | ENSG00000182240;      | CVB5_5Y3,Con_5Y2 |
| novel_circ_0015956 | - | ENSG00000081803;      | CVB5_5Y3,Con_5Y2 |
| novel_circ_0015190 | - | ENSG00000131023;      | CVB5_5Y3,Con_5Y2 |
| novel_circ_0015490 | - | ENSG00000112079;      | CVB5_5Y3,Con_5Y2 |
| novel_circ_0015712 | - | ENSG00000118420;      | CVB5_5Y3,Con_5Y2 |
| novel_circ_0014057 | + | ENSG00000151304;      | CVB5_5Y3,Con_5Y2 |
| novel_circ_0014241 | + | ENSG00000131507;      | CVB5_5Y3,Con_5Y2 |
| novel_circ_0014358 | + | ENSG00000113312;      | CVB5_5Y3,Con_5Y2 |
| novel_circ_0014450 | + | ENSG00000161021;      | CVB5_5Y3,Con_5Y2 |
| novel_circ_0014473 | + | n/a                   | CVB5_5Y3,Con_5Y2 |



|                    |   |                       |                   |
|--------------------|---|-----------------------|-------------------|
| novel_circ_0014505 | + | ENSG00000113460;      | CVB5_5Y3,Con_5Y2  |
| novel_circ_0012176 | - | ENSG00000169359;      | CVB5_5Y3,Con_5Y2  |
| novel_circ_0012382 | + | ENSG00000073803;      | CVB5_5Y3,Con_5Y2  |
| novel_circ_0012575 | + | ENSG00000152642;      | CVB5_5Y3,Con_5Y2  |
| novel_circ_0012579 | + | ENSG00000170293;      | CVB5_5Y3,Con_5Y2  |
| novel_circ_0012707 | + | ENSG00000163808;      | CVB5_5Y3,Con_5Y2  |
| novel_circ_0010241 | - | ENSG00000121964;      | CVB5_5Y3,Con_5Y2  |
| novel_circ_0010267 | + | ENSG00000080345;      | CVB5_5Y3,Con_5Y2  |
| novel_circ_0010452 | + | ENSG00000144354;      | CVB5_5Y3,Con_5Y2  |
| novel_circ_0007324 | + | ENSG00000116731;      | CVB5_5Y3,Con_5Y2  |
| novel_circ_0007521 | + | ENSG00000117143;      | CVB5_5Y3,Con_5Y2  |
| novel_circ_0008287 | - | ENSG00000196418;      | CVB5_5Y3,Con_5Y2  |
| novel_circ_0008819 | - | ENSG00000118454;      | CVB5_5Y3,Con_5Y2  |
| novel_circ_0017815 | + | ENSG00000188959;      | CVB5_5Y3,Con_5Y2  |
| novel_circ_0018076 | - | ENSG00000130559;      | CVB5_5Y3,Con_5Y2  |
| novel_circ_0017147 | - | ENSG00000261236;      | CVB5_5Y3,Con_5Y2  |
| novel_circ_0017415 | - | ENSG00000253729;      | CVB5_5Y3,Con_5Y2  |
| novel_circ_0017446 | + | ENSG00000137574;      | CVB5_5Y3,Con_5Y2  |
| novel_circ_0017523 | + | ENSG00000104218;      | CVB5_5Y3,Con_5Y2  |
| hsa_circ_0008930   | - | ENSG00000147099;ENSG0 | CVB5_5Y3,Con_5Y2, |
| hsa_circ_0030771   | + | ENSG00000175198;      | CVB5_5Y3,Con_5Y2, |
| hsa_circ_0002009   | + | ENSG00000111203;      | CVB5_5Y3,Con_5Y2, |
| hsa_circ_0027731   | - | ENSG00000057704;      | CVB5_5Y3,Con_5Y2, |
| hsa_circ_0037527   | + | ENSG00000162063;      | CVB5_5Y3,Con_5Y2, |
| hsa_circ_0040487   | - | ENSG00000168411;      | CVB5_5Y3,Con_5Y2, |
| hsa_circ_0040816   | + | ENSG00000172530;      | CVB5_5Y3,Con_5Y2, |
| hsa_circ_0000617   | - | ENSG00000074603;      | CVB5_5Y3,Con_5Y2, |
| hsa_circ_0005261   | - | ENSG00000105486;      | CVB5_5Y3,Con_5Y2, |
| hsa_circ_0082689   | - | ENSG00000059378;      | CVB5_5Y3,Con_5Y2, |
| hsa_circ_0006010   | - | ENSG00000229358;      | CVB5_5Y3,Con_5Y2, |
| hsa_circ_0079363   | - | ENSG00000164535;      | CVB5_5Y3,Con_5Y2, |
| hsa_circ_0004074   | + | n/a                   | CVB5_5Y3,Con_5Y2, |
| hsa_circ_0008975   | + | ENSG00000071205;      | CVB5_5Y3,Con_5Y2, |
| hsa_circ_0056840   | + | ENSG00000136536;      | CVB5_5Y3,Con_5Y2, |
| hsa_circ_0005899   | - | ENSG00000143669;      | CVB5_5Y3,Con_5Y2, |
| hsa_circ_0011571   | - | ENSG00000142687;      | CVB5_5Y3,Con_5Y2, |
| hsa_circ_0005684   | + | ENSG00000137145;      | CVB5_5Y3,Con_5Y2, |
| hsa_circ_0085189   | - | ENSG00000104517;      | CVB5_5Y3,Con_5Y2, |
| hsa_circ_0085760   | - | ENSG00000169398;      | CVB5_5Y3,Con_5Y2, |
| hsa_circ_0002946   | + | ENSG00000147649;      | CVB5_5Y3,Con_5Y2, |
| novel_circ_0000447 | - | ENSG00000107890;      | CVB5_5Y3,Con_5Y2, |
| novel_circ_0000788 | - | ENSG00000166348;      | CVB5_5Y3,Con_5Y2, |
| novel_circ_0004799 | - | n/a                   | CVB5_5Y3,Con_5Y2, |
| novel_circ_0004464 | + | ENSG00000140403;      | CVB5_5Y3,Con_5Y2, |
| novel_circ_0003870 | - | ENSG00000100784;      | CVB5_5Y3,Con_5Y2, |
| novel_circ_0003883 | - | ENSG00000100815;      | CVB5_5Y3,Con_5Y2, |
| novel_circ_0006714 | + | ENSG00000132003;      | CVB5_5Y3,Con_5Y2, |
| novel_circ_0006330 | + | ENSG00000101773;      | CVB5_5Y3,Con_5Y2, |
| novel_circ_0009834 | - | ENSG00000233080;      | CVB5_5Y3,Con_5Y2, |
| novel_circ_0009373 | - | ENSG00000124214;      | CVB5_5Y3,Con_5Y2, |
| novel_circ_0015603 | + | ENSG00000112200;      | CVB5_5Y3,Con_5Y2, |
| novel_circ_0015623 | + | ENSG00000118482;      | CVB5_5Y3,Con_5Y2, |
| hsa_circ_0004438   | - | ENSG00000150990;      | CVB5_5Y3,Con_5Y3  |
| hsa_circ_0025039   | - | ENSG00000111206;      | CVB5_5Y3,Con_5Y3  |
| hsa_circ_0002886   | + | ENSG00000179104;      | CVB5_5Y3,Con_5Y3  |
| hsa_circ_0020919   | - | ENSG00000110713;      | CVB5_5Y3,Con_5Y3  |
| hsa_circ_0022512   | - | ENSG00000234857;ENSG0 | CVB5_5Y3,Con_5Y3  |
| hsa_circ_0007583   | + | ENSG00000158636;      | CVB5_5Y3,Con_5Y3  |

|                    |   |                       |                  |
|--------------------|---|-----------------------|------------------|
| hsa_circ_0004792   | - | ENSG00000107581;      | CVB5_5Y3,Con_5Y3 |
| hsa_circ_0008851   | + | ENSG00000095794;      | CVB5_5Y3,Con_5Y3 |
| hsa_circ_0000787   | - | ENSG00000121060;      | CVB5_5Y3,Con_5Y3 |
| hsa_circ_0008052   | + | ENSG00000047578;      | CVB5_5Y3,Con_5Y3 |
| hsa_circ_0037710   | + | ENSG00000103423;      | CVB5_5Y3,Con_5Y3 |
| hsa_circ_0008471   | + | ENSG00000156970;      | CVB5_5Y3,Con_5Y3 |
| hsa_circ_0051106   | + | ENSG00000160410;      | CVB5_5Y3,Con_5Y3 |
| hsa_circ_0048782   | - | ENSG00000196365;      | CVB5_5Y3,Con_5Y3 |
| hsa_circ_0047596   | - | ENSG00000078043;      | CVB5_5Y3,Con_5Y3 |
| hsa_circ_0006917   | - | ENSG00000101391;      | CVB5_5Y3,Con_5Y3 |
| hsa_circ_0060193   | + | ENSG00000101084;ENSG0 | CVB5_5Y3,Con_5Y3 |
| hsa_circ_0062090   | + | ENSG00000160299;      | CVB5_5Y3,Con_5Y3 |
| hsa_circ_0079039   | - | ENSG00000188191;      | CVB5_5Y3,Con_5Y3 |
| hsa_circ_0005145   | + | ENSG00000154124;      | CVB5_5Y3,Con_5Y3 |
| hsa_circ_0074719   | + | ENSG00000155508;      | CVB5_5Y3,Con_5Y3 |
| hsa_circ_0070573   | - | ENSG00000138785;      | CVB5_5Y3,Con_5Y3 |
| hsa_circ_0005298   | + | ENSG00000281028;ENSG0 | CVB5_5Y3,Con_5Y3 |
| hsa_circ_0006908   | + | ENSG00000115295;      | CVB5_5Y3,Con_5Y3 |
| hsa_circ_0006583   | + | ENSG00000081026;      | CVB5_5Y3,Con_5Y3 |
| hsa_circ_0008815   | - | ENSG00000134744;      | CVB5_5Y3,Con_5Y3 |
| hsa_circ_0006519   | - | ENSG00000198363;      | CVB5_5Y3,Con_5Y3 |
| novel_circ_0018714 | - | ENSG00000129680;      | CVB5_5Y3,Con_5Y3 |
| novel_circ_0001919 | - | ENSG00000231887;ENSG0 | CVB5_5Y3,Con_5Y3 |
| novel_circ_0002488 | + | ENSG00000123268;      | CVB5_5Y3,Con_5Y3 |
| novel_circ_0001147 | + | ENSG00000110395;      | CVB5_5Y3,Con_5Y3 |
| novel_circ_0000193 | - | ENSG00000107581;      | CVB5_5Y3,Con_5Y3 |
| novel_circ_0000440 | - | ENSG00000136754;      | CVB5_5Y3,Con_5Y3 |
| novel_circ_0000726 | + | ENSG00000060339;      | CVB5_5Y3,Con_5Y3 |
| novel_circ_0005295 | - | ENSG00000141027;      | CVB5_5Y3,Con_5Y3 |
| novel_circ_0005746 | - | ENSG00000011258;      | CVB5_5Y3,Con_5Y3 |
| novel_circ_0003938 | - | ENSG00000140470;      | CVB5_5Y3,Con_5Y3 |
| novel_circ_0004022 | - | ENSG00000021776;      | CVB5_5Y3,Con_5Y3 |
| novel_circ_0003543 | - | ENSG00000100479;      | CVB5_5Y3,Con_5Y3 |
| novel_circ_0003925 | - | ENSG00000127152;      | CVB5_5Y3,Con_5Y3 |
| novel_circ_0007033 | + | ENSG00000177380;      | CVB5_5Y3,Con_5Y3 |
| novel_circ_0015416 | - | ENSG00000021355;      | CVB5_5Y3,Con_5Y3 |
| novel_circ_0015481 | - | ENSG00000096063;      | CVB5_5Y3,Con_5Y3 |
| novel_circ_0015535 | - | ENSG00000124571;      | CVB5_5Y3,Con_5Y3 |
| novel_circ_0012568 | + | n/a                   | CVB5_5Y3,Con_5Y3 |
| novel_circ_0012617 | - | ENSG00000153560;      | CVB5_5Y3,Con_5Y3 |
| novel_circ_0012686 | + | ENSG00000114812;      | CVB5_5Y3,Con_5Y3 |
| novel_circ_0010117 | + | ENSG00000125629;      | CVB5_5Y3,Con_5Y3 |
| novel_circ_0011636 | + | ENSG00000176407;      | CVB5_5Y3,Con_5Y3 |
| novel_circ_0008936 | + | ENSG00000153936;ENSG0 | CVB5_5Y3,Con_5Y3 |
| novel_circ_0018332 | + | ENSG00000120158;      | CVB5_5Y3,Con_5Y3 |
| novel_circ_0018454 | + | ENSG00000135040;      | CVB5_5Y3,Con_5Y3 |
| novel_circ_0016991 | - | ENSG00000254166;      | CVB5_5Y3,Con_5Y3 |



































































































,Con\_5Y3  
,Con\_5Y3  
,Con\_5Y3  
,Con\_5Y3  
,Con\_5Y3  
,Con\_5Y3  
,Con\_5Y3  
,Con\_5Y3





,Con\_5Y3  
,Con\_5Y3  
,Con\_5Y3  
,Con\_5Y3  
,Con\_5Y3  
,Con\_5Y3  
,Con\_5Y3  
,Con\_5Y3  
,Con\_5Y3  
,Con\_5Y3  
,Con\_5Y3  
,Con\_5Y3  
,Con\_5Y3  
,Con\_5Y3  
,Con\_5Y3  
,Con\_5Y3  
,Con\_5Y3  
,Con\_5Y3  
,Con\_5Y3

?2  
?2  
?2  
?2









































































,Con\_5Y3
