# Supplementary material for: Expression Profiles of Differentially Expressed Circular RNAs and circRNA–miRNA–mRNA Regulatory Networks in SH-SY5Y Cells Infected with Coxsackievirus B5
Source: Hindawi journal article supplement (doi:10.1155/2022/9298149), 2022-10-10
Supplement: f2 [file 9298149.f2.pdf]

**Table S2. Feature of identified circRNA genomic**

| <b>Feature</b> | <b>Sample</b> | <b>Num</b> |
|----------------|---------------|------------|
| exon           | CVB5_5Y1      | 7274       |
| intron         | CVB5_5Y1      | 187        |
| intergenic     | CVB5_5Y1      | 100        |
| exon           | CVB5_5Y2      | 7936       |
| intron         | CVB5_5Y2      | 234        |
| intergenic     | CVB5_5Y2      | 110        |
| exon           | CVB5_5Y3      | 7993       |
| intron         | CVB5_5Y3      | 201        |
| intergenic     | CVB5_5Y3      | 98         |
| exon           | Con_5Y1       | 9604       |
| intron         | Con_5Y1       | 267        |
| intergenic     | Con_5Y1       | 127        |
| exon           | Con_5Y2       | 10492      |
| intron         | Con_5Y2       | 322        |
| intergenic     | Con_5Y2       | 136        |
| exon           | Con_5Y3       | 8111       |
| intron         | Con_5Y3       | 203        |
| intergenic     | Con_5Y3       | 111        |
