# Supplementary material for: Expression Profiles of Differentially Expressed Circular RNAs and circRNA–miRNA–mRNA Regulatory Networks in SH-SY5Y Cells Infected with Coxsackievirus B5
Source: Hindawi journal article supplement (doi:10.1155/2022/9298149), 2022-10-10
Supplement: f3 [file 9298149.f3.pdf]

Table S3. Summary of sequencing data quality

| <b>Sample_name</b> | <b>Raw_reads</b> | <b>Clean_reads</b> | <b>Raw_bases(G)</b> | <b>Clean_bases(G)</b> | <b>Error rate(%)</b> | <b>Q20(%)</b> | <b>Q30(%)</b> | <b>GC_content(%)</b> |
|--------------------|------------------|--------------------|---------------------|-----------------------|----------------------|---------------|---------------|----------------------|
| Con_5Y1            | 104866878        | 102846726          | 15.73               | 15.43                 | 0.03                 | 97.78         | 93.73         | 51.71                |
| Con_5Y2            | 127653032        | 125404704          | 19.15               | 18.81                 | 0.03                 | 97.81         | 93.78         | 51.02                |
| Con_5Y3            | 83004818         | 81340414           | 12.45               | 12.2                  | 0.03                 | 97.9          | 93.97         | 51.04                |
| CVB5_5Y1           | 89868976         | 87419108           | 13.48               | 13.11                 | 0.03                 | 97.77         | 93.75         | 53.48                |
| CVB5_5Y2           | 100094218        | 97465572           | 15.01               | 14.62                 | 0.03                 | 97.99         | 94.23         | 52.96                |
| CVB5_5Y3           | 99830494         | 97972780           | 14.97               | 14.7                  | 0.03                 | 97.9          | 94.02         | 52.25                |
