# Supplementary material for: Expression Profiles of Differentially Expressed Circular RNAs and circRNA–miRNA–mRNA Regulatory Networks in SH-SY5Y Cells Infected with Coxsackievirus B5
Source: Hindawi journal article supplement (doi:10.1155/2022/9298149), 2022-10-10
Supplement: f4 [file 9298149.f4.pdf]

**Table S4. The distribution of TPM values of circRNAs**

| <b>TPM Interval</b> | <b>CVB5_5Y1.tpm</b> | <b>CVB5_5Y2.tpm</b> | <b>CVB5_5Y3.tpm</b> | <b>Con_5Y1.tpm</b> | <b>Con_5Y2.tpm</b> | <b>Con_5Y3.tpm</b> |
|---------------------|---------------------|---------------------|---------------------|--------------------|--------------------|--------------------|
| 0-0.1               | 7697(69.21%)        | 7352(66.11%)        | 7401(66.55%)        | 6586(59.22%)       | 6102(54.87%)       | 7303(65.67%)       |
| 0.1-0.3             | 0(0.00%)            | 0(0.00%)            | 0(0.00%)            | 0(0.00%)           | 0(0.00%)           | 0(0.00%)           |
| 0.3-3.57            | 0(0.00%)            | 0(0.00%)            | 0(0.00%)            | 0(0.00%)           | 0(0.00%)           | 0(0.00%)           |
| 3.57-15             | 0(0.00%)            | 0(0.00%)            | 0(0.00%)            | 0(0.00%)           | 0(0.00%)           | 0(0.00%)           |
| 15-60               | 0(0.00%)            | 0(0.00%)            | 0(0.00%)            | 0(0.00%)           | 1219(10.96%)       | 0(0.00%)           |
| >60                 | 3424(30.79%)        | 3769(33.89%)        | 3720(33.45%)        | 4535(40.78%)       | 3800(34.17%)       | 3818(34.33%)       |
