# Supplementary material for: Expression Profiles of Differentially Expressed Circular RNAs and circRNA–miRNA–mRNA Regulatory Networks in SH-SY5Y Cells Infected with Coxsackievirus B5
Source: Hindawi journal article supplement (doi:10.1155/2022/9298149), 2022-10-10
Supplement: f5 [file 9298149.f5.pdf]

**Table S5. miRNA targets of circRNA**

| <b>miRNA</b>     | <b>circRNA</b>     | <b>miRNA</b>     | <b>circRNA</b>   |
|------------------|--------------------|------------------|------------------|
| hsa-miR-124-3p   | novel_circ_0014617 | hsa-miR-105-5p   | hsa_circ_0008378 |
| hsa-miR-1254     | novel_circ_0014617 | hsa-miR-1294     | hsa_circ_0008378 |
| hsa-miR-1270     | novel_circ_0014617 | hsa-miR-133a-3p  | hsa_circ_0008378 |
| hsa-miR-1285-5p  | novel_circ_0014617 | hsa-miR-133b     | hsa_circ_0008378 |
| hsa-miR-1288-3p  | novel_circ_0014617 | hsa-miR-17-3p    | hsa_circ_0008378 |
| hsa-miR-1298-5p  | novel_circ_0014617 | hsa-miR-224-5p   | hsa_circ_0008378 |
| hsa-miR-138-2-3p | novel_circ_0014617 | hsa-miR-23a-3p   | hsa_circ_0008378 |
| hsa-miR-138-5p   | novel_circ_0014617 | hsa-miR-23b-3p   | hsa_circ_0008378 |
| hsa-miR-2110     | novel_circ_0014617 | hsa-miR-23c      | hsa_circ_0008378 |
| hsa-miR-2115-5p  | novel_circ_0014617 | hsa-miR-2681-3p  | hsa_circ_0008378 |
| hsa-miR-2681-5p  | novel_circ_0014617 | hsa-miR-29a-5p   | hsa_circ_0008378 |
| hsa-miR-29a-5p   | novel_circ_0014617 | hsa-miR-3138     | hsa_circ_0008378 |
| hsa-miR-302b-5p  | novel_circ_0014617 | hsa-miR-3160-5p  | hsa_circ_0008378 |
| hsa-miR-302d-5p  | novel_circ_0014617 | hsa-miR-3611     | hsa_circ_0008378 |
| hsa-miR-3116     | novel_circ_0014617 | hsa-miR-3654     | hsa_circ_0008378 |
| hsa-miR-3150a-3p | novel_circ_0014617 | hsa-miR-3689a-5p | hsa_circ_0008378 |
| hsa-miR-3169     | novel_circ_0014617 | hsa-miR-3689b-5p | hsa_circ_0008378 |
| hsa-miR-320e     | novel_circ_0014617 | hsa-miR-3689e    | hsa_circ_0008378 |
| hsa-miR-3690     | novel_circ_0014617 | hsa-miR-3689f    | hsa_circ_0008378 |
| hsa-miR-382-3p   | novel_circ_0014617 | hsa-miR-4315     | hsa_circ_0008378 |
| hsa-miR-4254     | novel_circ_0014617 | hsa-miR-4325     | hsa_circ_0008378 |
| hsa-miR-4299     | novel_circ_0014617 | hsa-miR-4505     | hsa_circ_0008378 |
| hsa-miR-4326     | novel_circ_0014617 | hsa-miR-4520-3p  | hsa_circ_0008378 |
| hsa-miR-4423-5p  | novel_circ_0014617 | hsa-miR-4535     | hsa_circ_0008378 |
| hsa-miR-4434     | novel_circ_0014617 | hsa-miR-455-3p   | hsa_circ_0008378 |
| hsa-miR-4516     | novel_circ_0014617 | hsa-miR-4693-5p  | hsa_circ_0008378 |
| hsa-miR-4535     | novel_circ_0014617 | hsa-miR-4793-3p  | hsa_circ_0008378 |
| hsa-miR-4639-5p  | novel_circ_0014617 | hsa-miR-486-5p   | hsa_circ_0008378 |
| hsa-miR-4667-5p  | novel_circ_0014617 | hsa-miR-492      | hsa_circ_0008378 |
| hsa-miR-4700-5p  | novel_circ_0014617 | hsa-miR-5002-5p  | hsa_circ_0008378 |
| hsa-miR-4720-5p  | novel_circ_0014617 | hsa-miR-518a-3p  | hsa_circ_0008378 |
| hsa-miR-4762-3p  | novel_circ_0014617 | hsa-miR-518b     | hsa_circ_0008378 |
| hsa-miR-4768-3p  | novel_circ_0014617 | hsa-miR-518c-3p  | hsa_circ_0008378 |
| hsa-miR-4799-3p  | novel_circ_0014617 | hsa-miR-518d-3p  | hsa_circ_0008378 |
| hsa-miR-5006-5p  | novel_circ_0014617 | hsa-miR-518e-3p  | hsa_circ_0008378 |
| hsa-miR-5089-5p  | novel_circ_0014617 | hsa-miR-518f-3p  | hsa_circ_0008378 |
| hsa-miR-509-3p   | novel_circ_0014617 | hsa-miR-544a     | hsa_circ_0008378 |
| hsa-miR-5100     | novel_circ_0014617 | hsa-miR-548aw    | hsa_circ_0008378 |
| hsa-miR-512-5p   | novel_circ_0014617 | hsa-miR-5589-5p  | hsa_circ_0008378 |
| hsa-miR-518c-5p  | novel_circ_0014617 | hsa-miR-5787     | hsa_circ_0008378 |
| hsa-miR-550b-3p  | novel_circ_0014617 | hsa-miR-606      | hsa_circ_0008378 |
| hsa-miR-5588-5p  | novel_circ_0014617 | hsa-miR-6500-3p  | hsa_circ_0008378 |
| hsa-miR-5689     | novel_circ_0014617 | hsa-miR-6825-3p  | hsa_circ_0008378 |
| hsa-miR-5703     | novel_circ_0014617 | hsa-miR-7853-5p  | hsa_circ_0008378 |
| hsa-miR-605-3p   | novel_circ_0014617 | hsa-miR-7854-3p  | hsa_circ_0008378 |
| hsa-miR-6079     | novel_circ_0014617 | hsa-miR-943      | hsa_circ_0008378 |
| hsa-miR-619-5p   | novel_circ_0014617 |                  |                  |
| hsa-miR-620      | novel_circ_0014617 |                  |                  |
| hsa-miR-629-3p   | novel_circ_0014617 |                  |                  |
| hsa-miR-6501-5p  | novel_circ_0014617 |                  |                  |
| hsa-miR-6506-5p  | novel_circ_0014617 |                  |                  |
| hsa-miR-656-5p   | novel_circ_0014617 |                  |                  |
| hsa-miR-664a-3p  | novel_circ_0014617 |                  |                  |
| hsa-miR-665      | novel_circ_0014617 |                  |                  |
| hsa-miR-670-5p   | novel_circ_0014617 |                  |                  |
| hsa-miR-6763-5p  | novel_circ_0014617 |                  |                  |

|                  |                    |
|------------------|--------------------|
| hsa-miR-6768-5p  | novel_circ_0014617 |
| hsa-miR-6770-5p  | novel_circ_0014617 |
| hsa-miR-6780a-3p | novel_circ_0014617 |
| hsa-miR-6787-3p  | novel_circ_0014617 |
| hsa-miR-6800-3p  | novel_circ_0014617 |
| hsa-miR-6803-3p  | novel_circ_0014617 |
| hsa-miR-6821-3p  | novel_circ_0014617 |
| hsa-miR-6845-3p  | novel_circ_0014617 |
| hsa-miR-6861-3p  | novel_circ_0014617 |
| hsa-miR-6867-3p  | novel_circ_0014617 |
| hsa-miR-7113-3p  | novel_circ_0014617 |
| hsa-miR-7151-5p  | novel_circ_0014617 |
| hsa-miR-7843-3p  | novel_circ_0014617 |
| hsa-miR-8089     | novel_circ_0014617 |
